# Supplementary material for: Metabolomics and transcriptomics based multi-omics integration reveals radiation-induced altered pathway networking and underlying mechanism
Source: PubMed Central journal article supplement (PMC10492812; doi:10.1038/s41540-023-00305-5), 2023-09-09
Supplement: 41540_2023_305_MOESM1_ESM.pdf [file 41540_2023_305_MOESM1_ESM.pdf]

**Metabolomics and Transcriptomics based Multi-Omics Integration Reveals Radiation-Induced altered pathway networking and underlying mechanism**

*Kiran Maan<sup>1,2</sup>, Ruchi Baghel<sup>1</sup>, Seema Dhariwal<sup>1</sup>, Apoorva Sharma<sup>1</sup>, Radhika Bakhshi<sup>2</sup>, Poonam Rana<sup>1\*</sup>*

<sup>1</sup>Metabolomics Research Facility, Institute of Nuclear Medicine and Allied Sciences (INMAS), DRDO, Delhi, India.

<sup>2</sup>Department of Biomedical Science, Shaheed Rajguru College of Applied Sciences for Women, University of Delhi, Delhi, India.

\*Corresponding Author:

Dr. Poonam Rana, Ph.D. Metabolomics Research Facility

Institute of Nuclear Medicine and Allied Sciences (INMAS), DRDO

S. K Mazumdar Road, Timarpur, Delhi-54, India Tel: 91-11-23905319

Email address: [poonam.inmas@gov.in](mailto:poonam.inmas@gov.in)

## TABLE OF CONTENT

**Supplementary Fig. 1:** The mean quality value across each base position in the read generated by MultiQC.

**Supplementary Fig. 2:** Principal component analysis (PCA) of metabolomics (A), lipidomics (B) in both ionization modes using LC-MS and transcriptomics profiles (C) in mice blood at 24 hrs post irradiation.

**Supplementary Fig. 3:** GO enrichment of differentially expressed genes in LD (A) and HD (B) group.

**Supplementary Fig. 4:** Dysregulated “Hematopoietic cell lineage” by KEGG pathway analysis of DEGs.

**Supplementary Fig. 5:** Joint-Pathway Analysis of significantly altered transcriptomic and metabolomic data after integration when LD and HD groups were compared.

Pathways having pathway impact  $> 0.2$  and  $-\log_{10}(p) > 1.3$  (cutoff is highlighted in red dotted lines) were considered.

(Enrichment analysis by hypergeometric test and topology measure by degree centrality).

(B) Lipid network generated using BioPAN software representing active or suppressed lipid pathways in HD vs LD groups respectively.

## Tables

**Supplementary Table 1:** Total RNA QC status of all the samples.

**Supplementary Table 2:** List of differentially expressed genes in LD group (A) and HD group (B) using edgeR software (two-tailed p-value calculation using Wald statistics and Log<sub>2</sub> fold change by maximum-likelihood estimate).

**Supplementary Table 3:** GO analysis of differentially expressed genes (DEGs) in the biological process (BP), molecular function (MF) and cellular component (CC) in LD group (A) and HD group (B) using the clusterProfiler R package for determining functions of the DEGs based on BH adjusted p-values (adjusted p-value for multiple testing calculated using Benjamin-Hochberg correction method to examine the significance of pathway-term enrichment).

**Supplementary Table 4:** KEGG pathway analysis of differentially expressed genes in LD group (A) and HD group (B) using the clusterProfiler R package for determining functions of the DEGs based on BH adjusted p-values (adjusted p-value for multiple testing calculated using Benjamin-Hochberg correction method).

**Supplementary Table 5:** Identified metabolites/ lipids list with their error in Da.

**Supplementary Table 6:** List of significantly changed metabolites and lipids in LD group and HD group using univariate analysis (two tailed student's t test).

**Supplementary Table 7:** Pathway analysis of dysregulated metabolites in LD group (A) and HD group (B) compared to Control group (p values shows pathway enrichment analysis based on Global Test and pathway impact values shows the pathway topology analysis).

**Supplementary Table 8:** Differentially expressed genes common in both radiation groups. (Two-tailed p-value calculation using Wald statistics and Log2 fold change by maximum-likelihood estimate).

## Supplementary Figures

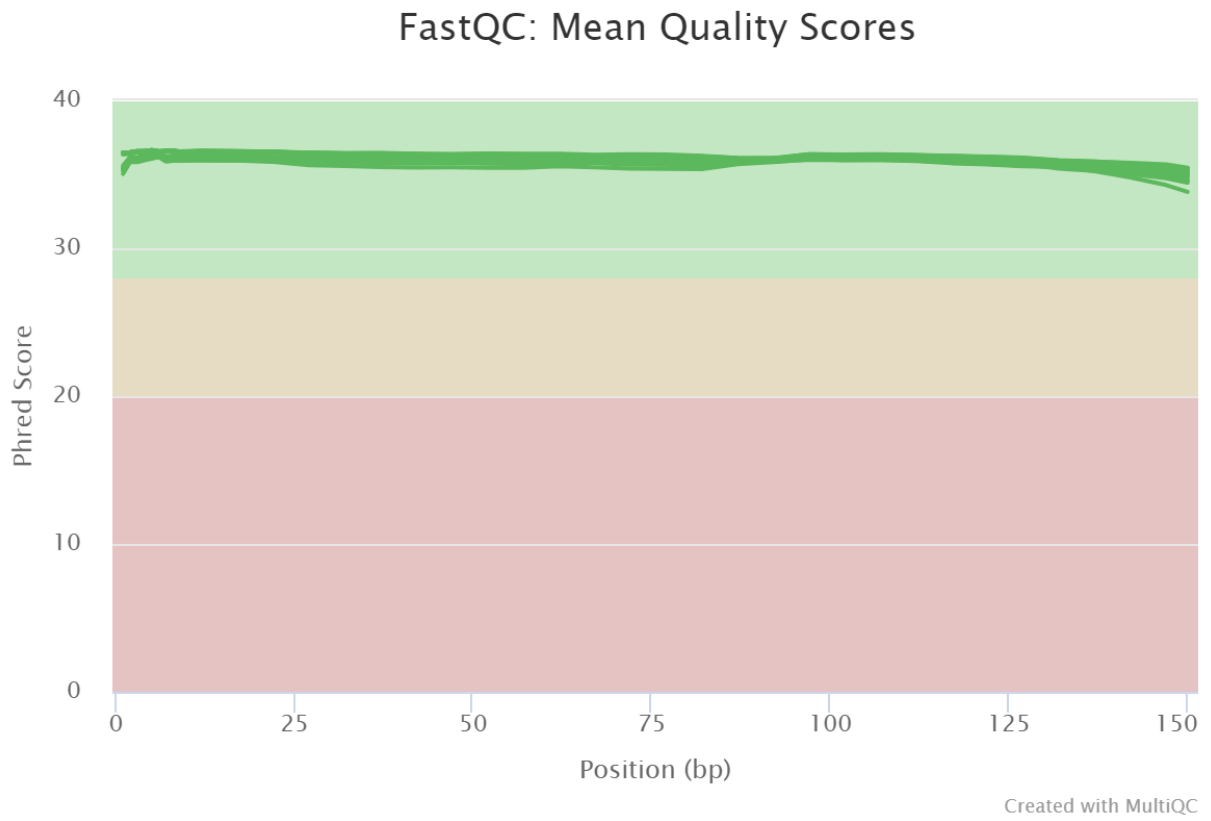

**Supplementary Fig. 1:** The mean quality value across each base position in the read generated by MultiQC.

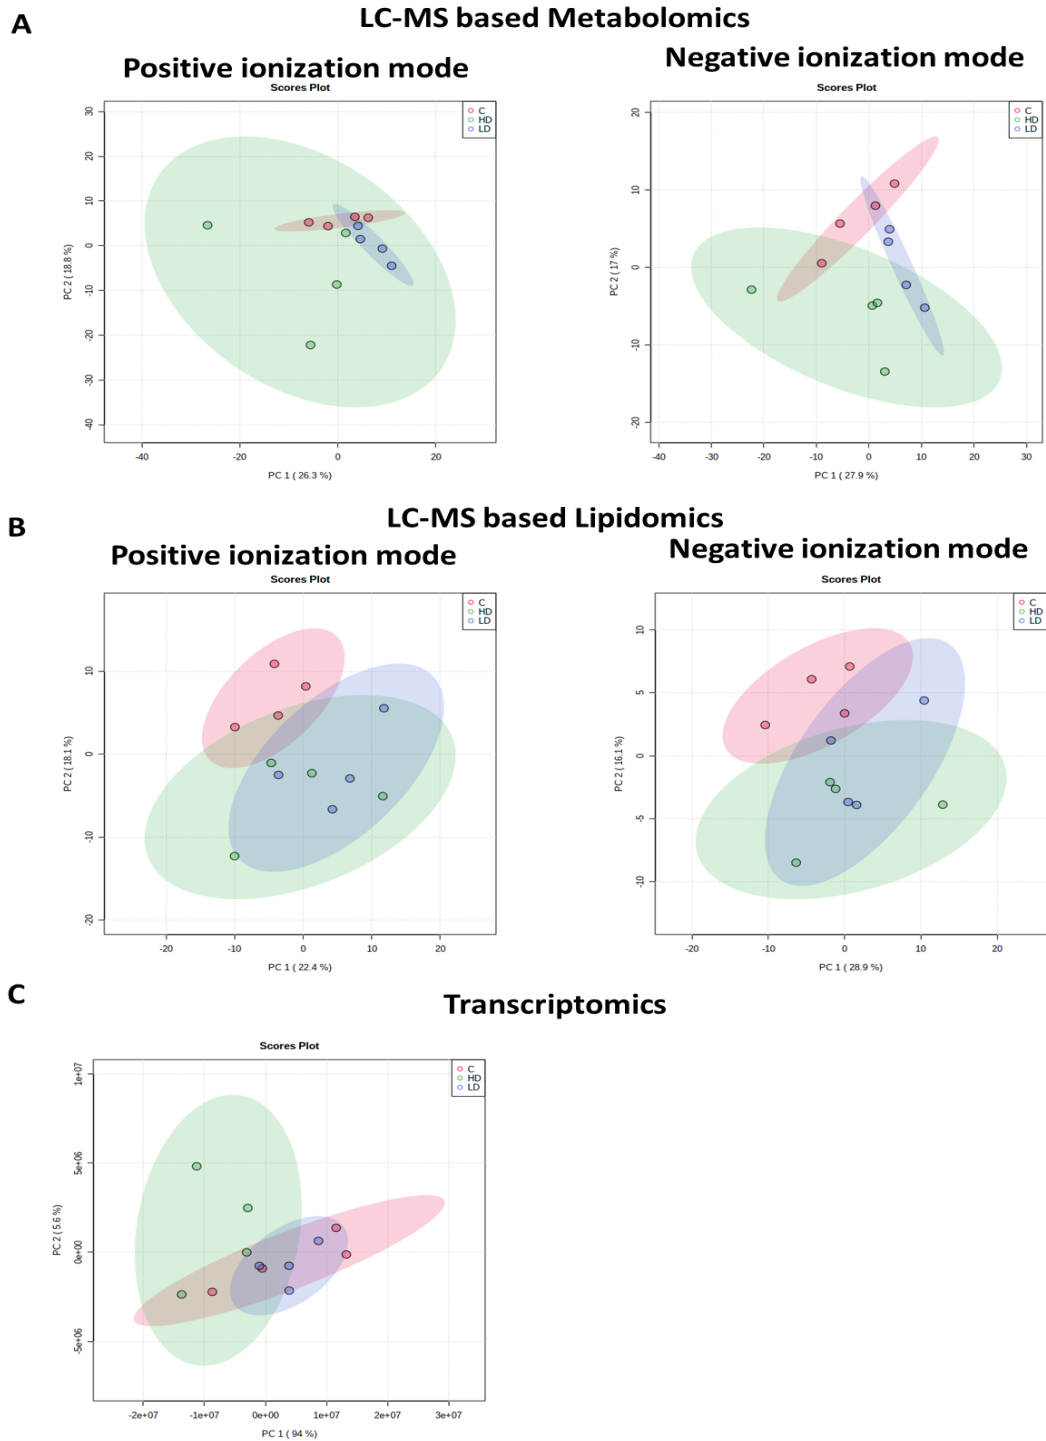

**Supplementary Fig. 2:** Principal component analysis (PCA) of metabolomics (A), lipidomics (B) in both ionization modes using LC-MS and transcriptomics profiles (C) in mice blood at 24 hrs post irradiation.

A

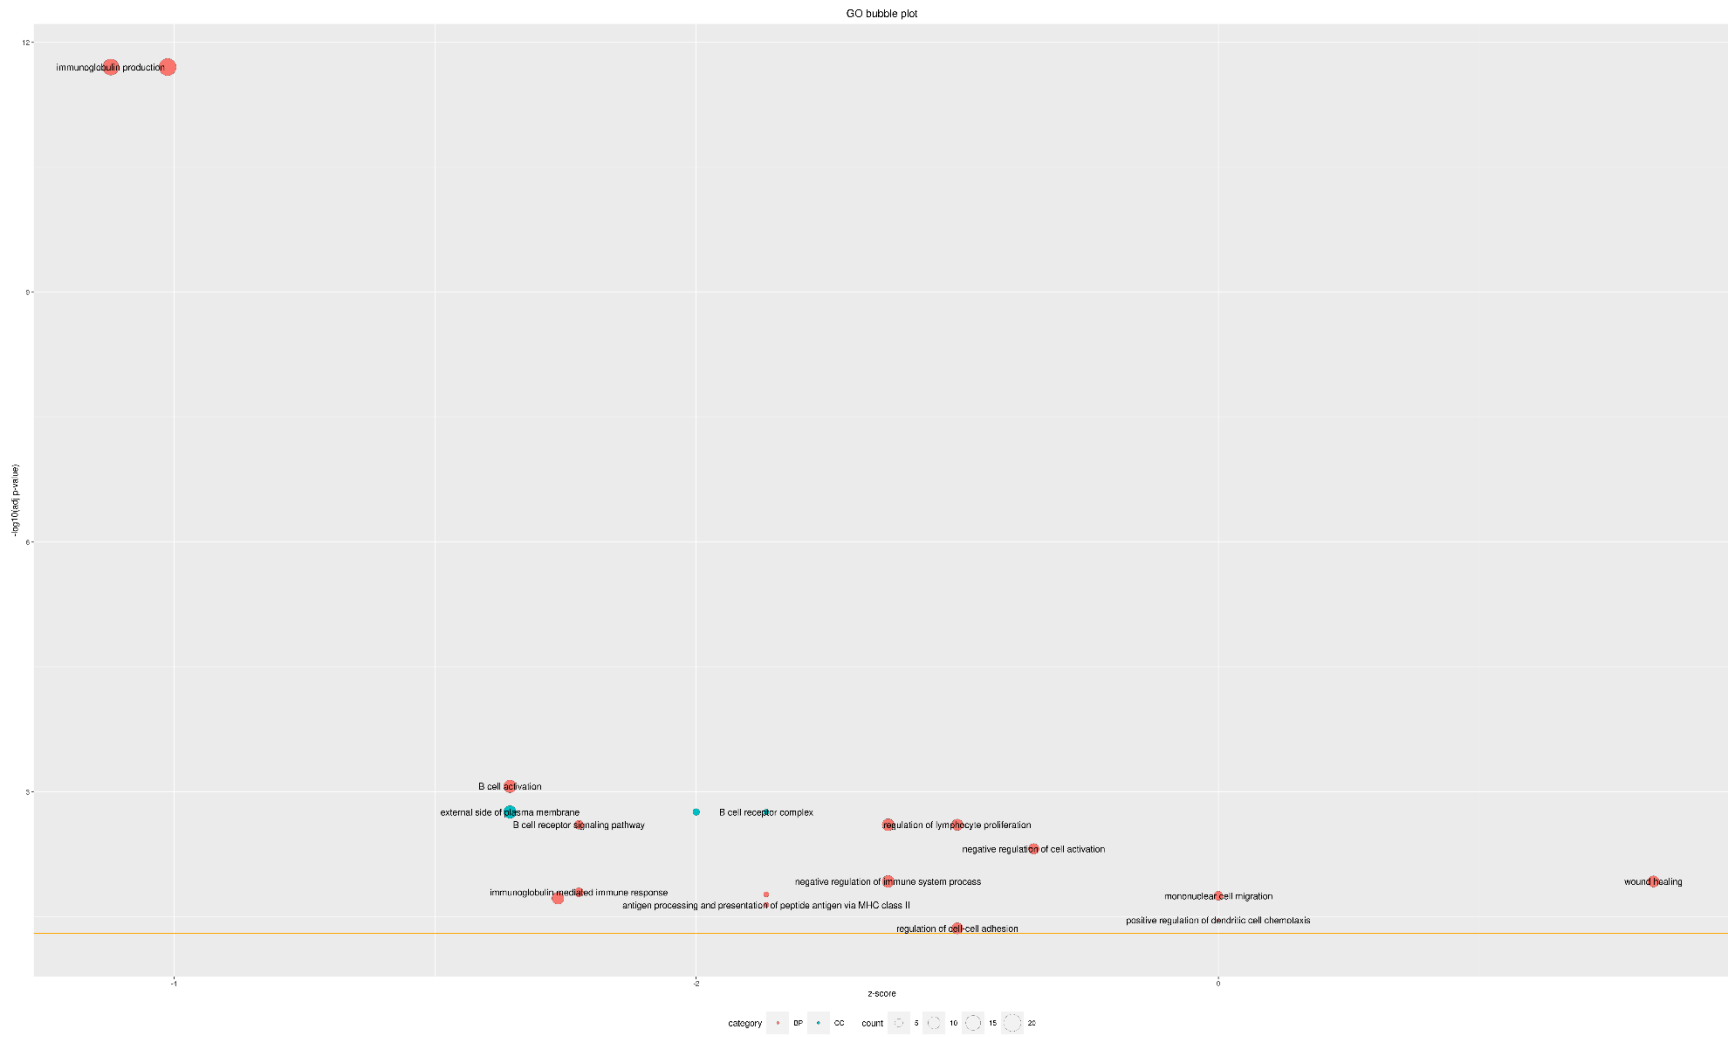







**A**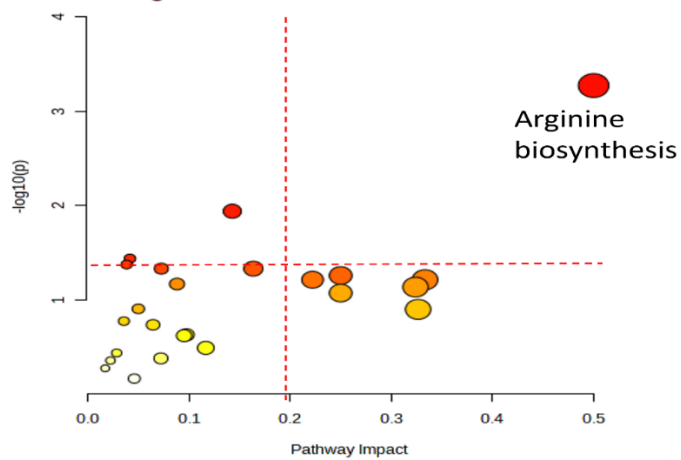**B**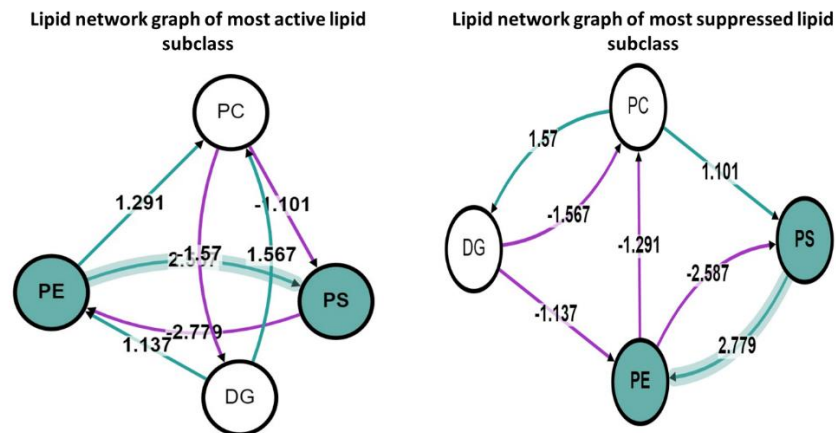

**Supplementary Fig. 5:** (A) Joint-Pathway Analysis of significantly altered transcriptomic and metabolomic data after integration when LD and HD groups were compared.

Pathways having pathway impact  $> 0.2$  and  $-\log_{10}(p) > 1.3$  (cutoff is highlighted in red dotted lines) were considered.

(Enrichment analysis by hypergeometric test and topology measure by degree centrality).

(B) Lipid network generated using BioPAN software representing active or suppressed lipid pathways in HD vs LD groups respectively.

**Supplementary Table 1:** Total RNA QC status of all the samples.

| Sample Details | Tapestation QC |               | QUBIT Quantification |                           |                     | Results     |
|----------------|----------------|---------------|----------------------|---------------------------|---------------------|-------------|
| Sample ID      | RIN            | 28S/18S Ratio | Conc. (ng/ul)        | Vol of RNA available (ul) | Total RNA mass (ng) | Test Result |
| C1             | 7.7            | 1.8           | 50.8                 | 25                        | 1270                | Pass        |
| C2             | 8.5            | 1.1           | 51.4                 | 25                        | 1285                | Pass        |
| C3             | 7.3            | 2.1           | 45                   | 15                        | 675                 | Pass        |
| CT4            | 8.4            | 1             | 51.8                 | 25                        | 1295                | Pass        |
| HD1            | 7.9            | 2.1           | 18.7                 | 25                        | 467.5               | Pass        |
| HD2            | 8.3            | 1.2           | 30.6                 | 25                        | 765                 | Pass        |
| HD3            | 8.4            | 1.1           | 37.8                 | 25                        | 945                 | Pass        |
| HD4            | 7.8            | 1.5           | 22.2                 | 15                        | 333                 | Pass        |
| LD1            | 7.6            | 1.2           | 20                   | 15                        | 300                 | Pass        |
| LD2            | 9.7            | 1.5           | 35                   | 25                        | 875                 | Pass        |
| LD3            | 9.2            | 1.9           | 32.8                 | 25                        | 820                 | Pass        |

**Supplementary Table 2 (A):** List of differentially expressed genes in LD group using edgeR software (two-tailed p-value calculation using Wald statistics and Log2 fold change by maximum-likelihood estimate).

| Column Names            | Description                                                                                                                               |
|-------------------------|-------------------------------------------------------------------------------------------------------------------------------------------|
| <b>Id</b>               | Gene Id                                                                                                                                   |
| <b>Sample1</b>          | Normalized expression value of Sample1                                                                                                    |
| <b>Sample2</b>          | Normalized expression value of Sample2                                                                                                    |
| <b>baseMean</b>         | The mean of normalized counts for all samples (normalized for sequencing depth)                                                           |
| <b>FoldChange</b>       | fold change of expression, calculated as $2\log_2(FC)$                                                                                    |
| <b>log2FoldChange</b>   | Log2 fold change (MLE – maximum-likelihood estimate): the ratio between the mean of normalized counts of Control over Test.               |
| <b>lfcSE</b>            | Standard error estimate for the log2 fold change estimate.                                                                                |
| <b>Stat</b>             | Wald statistic (the log2FoldChange divided by lfcSE, which is compared to a standard Normal distribution to generate a two-tailed pvalue) |
| <b>pvalue</b>           | Wald test p-value.                                                                                                                        |
| <b>Padj</b>             | BH adjusted p-values (adjusted p-value for multiple testing calculated using Benjamin-Hochberg correction method)                         |
| <b>gene_name</b>        | Gene symbol                                                                                                                               |
| <b>gene_description</b> | Gene Description                                                                                                                          |
| <b>gene_biotype</b>     | Gene Biotype                                                                                                                              |
| <b>ENTREZID</b>         | Entrez Gene Id                                                                                                                            |
| <b>TF.Family</b>        | Transcription Factor Family                                                                                                               |

| Control vs LD      |           |        |                 |             |             |           |                                                 |                |           |           |
|--------------------|-----------|--------|-----------------|-------------|-------------|-----------|-------------------------------------------------|----------------|-----------|-----------|
| Id                 | Base Mean | FC     | log2Fold Change | pvalue      | padj        | gene_name | gene_description                                | gene_biotype   | Entrez_id | TF_Family |
| ENSMUSG00000000204 | 1611.69   | 5.529  | 2.467           | 3.01475E-05 | 0.004095172 | Slfn4     | schlafen 4                                      | protein_coding | 20558     | -         |
| ENSMUSG00000000903 | 36.36     | 0.198  | -2.338          | 2.8913E-06  | 0.001138169 | Vpreb3    | pre-B lymphocyte gene 3                         | protein_coding | 22364     | -         |
| ENSMUSG00000001027 | 35.44     | 0.188  | -2.414          | 3.53847E-07 | 0.000310243 | Scn4a     | sodium channel, voltage-gated, type IV, alpha   | protein_coding | 110880    | -         |
| ENSMUSG00000002007 | 26.93     | 0.201  | -2.313          | 1.21856E-05 | 0.002527398 | Srpk3     | serine/arginine-rich protein specific kinase 3  | protein_coding | 56504     | -         |
| ENSMUSG00000002249 | 3.62      | 21.556 | 4.43            | 0.000321116 | 0.020785271 | Tead3     | TEA domain family member 3                      | protein_coding | 21678     | TEA       |
| ENSMUSG00000003379 | 838.5     | 0.247  | -2.016          | 2.11019E-06 | 0.000969132 | Cd79a     | CD79A antigen (immunoglobulin-associated alpha) | protein_coding | 12518     | -         |
| ENSMUSG00000003559 | 13.49     | 4.068  | 2.024           | 0.000341911 | 0.021763634 | As3mt     | arsenic (+3 oxidation state) methyltransferase  | protein_coding | 57344     | -         |

|                    |         |            |        |             |             |        |                                                                                                       |                |        |         |
|--------------------|---------|------------|--------|-------------|-------------|--------|-------------------------------------------------------------------------------------------------------|----------------|--------|---------|
| ENSMUSG00000005540 | 148.38  | 0.199      | -2.327 | 1.28322E-07 | 0.000165013 | Fcer2a | Fc receptor, IgE, low affinity II, alpha polypeptide                                                  | protein_coding | 14128  | -       |
| ENSMUSG00000014453 | 151.63  | 0.202      | -2.307 | 3.60188E-11 | 2.31589E-07 | Blk    | B lymphoid kinase                                                                                     | protein_coding | 12143  | -       |
| ENSMUSG00000015316 | 334.24  | 4.122      | 2.043  | 0.00011489  | 0.010355659 | Slamf1 | signaling lymphocytic activation molecule family member 1                                             | protein_coding | 27218  | -       |
| ENSMUSG00000017009 | 33.35   | 0.209      | -2.261 | 9.49285E-06 | 0.002317817 | Sdc4   | syndecan 4                                                                                            | protein_coding | 20971  | -       |
| ENSMUSG00000017400 | 21.82   | 0.155      | -2.687 | 2.46073E-05 | 0.003618843 | Stac2  | SH3 and cysteine rich domain 2                                                                        | protein_coding | 217154 | -       |
| ENSMUSG00000017999 | 136.78  | 4.455      | 2.156  | 0.000526542 | 0.029439031 | Ddx27  | DEAD (Asp-Glu-Ala-Asp) box polypeptide 27                                                             | protein_coding | 228889 | -       |
| ENSMUSG00000018199 | 77.96   | 4.621      | 2.208  | 1.93529E-05 | 0.003218094 | Trove2 | TROVE domain family, member 2                                                                         | protein_coding | 20822  | -       |
| ENSMUSG00000019851 | 4.66    | 15.21<br>5 | 3.927  | 0.000521937 | 0.029266402 | Perp   | PERP, TP53 apoptosis effector                                                                         | protein_coding | 64058  | -       |
| ENSMUSG00000022504 | 155.64  | 0.168      | -2.569 | 2.47504E-11 | 2.31589E-07 | Ciita  | class II transactivator                                                                               | protein_coding | 12265  | -       |
| ENSMUSG00000022661 | 23.52   | 0.225      | -2.153 | 0.000465378 | 0.026957003 | Cd200  | CD200 antigen                                                                                         | protein_coding | 17470  | -       |
| ENSMUSG00000022803 | 35.05   | 4.777      | 2.256  | 6.06909E-06 | 0.001833855 | Popdc2 | popeye domain containing 2                                                                            | protein_coding | 64082  | -       |
| ENSMUSG00000023067 | 46.09   | 4.615      | 2.206  | 0.000682333 | 0.034274777 | Cdkn1a | cyclin-dependent kinase inhibitor 1A (P21)                                                            | protein_coding | 12575  | -       |
| ENSMUSG00000024076 | 142.45  | 0.018      | -5.769 | 6.43616E-05 | 0.006974556 | Vit    | vitrin                                                                                                | protein_coding | 74199  | -       |
| ENSMUSG00000024298 | 15.69   | 0.208      | -2.264 | 0.001050439 | 0.044047636 | Zfp871 | zinc finger protein 871                                                                               | protein_coding | 208292 | zf-C2H2 |
| ENSMUSG00000024610 | 2580.77 | 0.239      | -2.064 | 1.29498E-05 | 0.002619968 | Cd74   | CD74 antigen (invariant polypeptide of major histocompatibility complex, class II antigen-associated) | protein_coding | 16149  | -       |
| ENSMUSG00000025196 | 6.02    | 10.17<br>1 | 3.346  | 0.000922113 | 0.040888836 | Cpn1   | carboxypeptidase N, polypeptide 1                                                                     | protein_coding | 93721  | -       |
| ENSMUSG00000025856 | 65.18   | 4.629      | 2.211  | 4.93308E-08 | 7.92952E-05 | Pdgfa  | platelet derived growth factor, alpha                                                                 | protein_coding | 18590  | -       |
| ENSMUSG00000026181 | 151.86  | 0.08       | -3.647 | 0.000101166 | 0.00951894  | Ppm1f  | protein phosphatase 1F (PP2C domain containing)                                                       | protein_coding | 68606  | -       |
| ENSMUSG00000026357 | 1234.82 | 5.105      | 2.352  | 9.10367E-05 | 0.008831609 | Rgs18  | regulator of G-protein signaling 18                                                                   | protein_coding | 64214  | -       |
| ENSMUSG00000026837 | 57.56   | 6.328      | 2.662  | 0.000619833 | 0.032666571 | Col5a1 | collagen, type V, alpha 1                                                                             | protein_coding | 12831  | -       |
| ENSMUSG00000026976 | 108.73  | 0.017      | -5.903 | 0.00115039  | 0.0464057   | Pax8   | paired box 8                                                                                          | protein_coding | 18510  | PAX     |
| ENSMUSG00000026986 | 10.89   | 5.128      | 2.358  | 0.000388878 | 0.02388873  | Hnmt   | histamine N-methyltransferase                                                                         | protein_coding | 140483 | -       |
| ENSMUSG00000027014 | 66.9    | 0.181      | -2.468 | 0.001215641 | 0.047778322 | Cwc22  | CWC22 spliceosome-associated protein                                                                  | protein_coding | 80744  | -       |
| ENSMUSG00000027690 | 5.79    | 10.53<br>6 | 3.397  | 0.000130823 | 0.011366851 | Slc2a2 | solute carrier family 2 (facilitated glucose transporter), member 2                                   | protein_coding | 20526  | -       |

|                    |        |        |        |             |             |          |                                                         |                      |        |     |
|--------------------|--------|--------|--------|-------------|-------------|----------|---------------------------------------------------------|----------------------|--------|-----|
| ENSMUSG00000027855 | 7.32   | 5.855  | 2.55   | 0.000677731 | 0.034174367 | Sycp1    | synaptonemal complex protein 1                          | protein_coding       | 20957  | -   |
| ENSMUSG00000028524 | 78.93  | 4.674  | 2.225  | 3.97953E-06 | 0.001421501 | Sgip1    | SH3-domain GRB2-like (endophilin) interacting protein 1 | protein_coding       | 73094  | -   |
| ENSMUSG00000030787 | 5.02   | 14.239 | 3.832  | 5.63824E-05 | 0.006431565 | Lyve1    | lymphatic vessel endothelial hyaluronan receptor 1      | protein_coding       | 114332 | -   |
| ENSMUSG00000031425 | 116.98 | 4.853  | 2.279  | 2.47556E-06 | 0.001041053 | Plp1     | proteolipid protein (myelin) 1                          | protein_coding       | 18823  | -   |
| ENSMUSG00000031647 | 66.39  | 6.472  | 2.694  | 6.03898E-11 | 2.91215E-07 | Mfap3l   | microfibrillar-associated protein 3-like                | protein_coding       | 71306  | -   |
| ENSMUSG00000031842 | 11.39  | 0.153  | -2.706 | 0.000458006 | 0.026690282 | Pde4c    | phosphodiesterase 4C, cAMP specific                     | protein_coding       | 110385 | -   |
| ENSMUSG00000032261 | 602.31 | 4.126  | 2.045  | 2.43228E-05 | 0.003618843 | Sh3bgrl2 | SH3 domain binding glutamic acid-rich protein like 2    | protein_coding       | 212531 | -   |
| ENSMUSG00000037071 | 144.77 | 0.228  | -2.134 | 6.49026E-09 | 1.32396E-05 | Scd1     | stearoyl-Coenzyme A desaturase 1                        | protein_coding       | 20249  | -   |
| ENSMUSG00000038055 | 245.19 | 0.242  | -2.047 | 2.66169E-07 | 0.000256706 | Dexi     | dexamethasone-induced transcript                        | protein_coding       | 58239  | -   |
| ENSMUSG00000038059 | 436.68 | 4.178  | 2.063  | 9.97354E-06 | 0.002346092 | Smim3    | small integral membrane protein 3                       | protein_coding       | 106878 | -   |
| ENSMUSG00000038235 | 47.41  | 4.042  | 2.015  | 2.55667E-05 | 0.003680267 | F11r     | F11 receptor                                            | protein_coding       | 16456  | -   |
| ENSMUSG00000038331 | 37.16  | 5.352  | 2.42   | 0.001133072 | 0.046012283 | Satb2    | special AT-rich sequence binding protein 2              | protein_coding       | 212712 | CUT |
| ENSMUSG00000038421 | 131.28 | 0.25   | -2.001 | 6.86383E-09 | 1.32396E-05 | Fcrla    | Fc receptor-like A                                      | protein_coding       | 98752  | -   |
| ENSMUSG00000038775 | 7.36   | 6.529  | 2.707  | 0.000548102 | 0.03020159  | Vill     | villin-like                                             | protein_coding       | 22351  | -   |
| ENSMUSG00000040447 | 38.13  | 0.2    | -2.319 | 1.86816E-05 | 0.003133479 | Spns2    | spinster homolog 2                                      | protein_coding       | 216892 | -   |
| ENSMUSG00000040592 | 467.69 | 0.245  | -2.03  | 1.62155E-07 | 0.000195488 | Cd79b    | CD79B antigen                                           | protein_coding       | 15985  | -   |
| ENSMUSG00000040899 | 24.02  | 0.178  | -2.49  | 1.73005E-06 | 0.000813924 | Ccr6     | chemokine (C-C motif) receptor 6                        | protein_coding       | 12458  | -   |
| ENSMUSG00000041538 | 279.79 | 0.188  | -2.412 | 1.171E-09   | 3.22677E-06 | H2-Ob    | histocompatibility 2, O region beta locus               | protein_coding       | 15002  | -   |
| ENSMUSG00000041670 | 48.27  | 4.185  | 2.065  | 6.4545E-06  | 0.001834401 | Rims1    | regulating synaptic membrane exocytosis 1               | protein_coding       | 116837 | -   |
| ENSMUSG00000042474 | 177.91 | 0.22   | -2.185 | 4.37832E-08 | 7.67758E-05 | Fcgr     | Fc fragment of IgM receptor                             | protein_coding       | 69169  | -   |
| ENSMUSG00000042734 | 50.77  | 0.082  | -3.605 | 2.19798E-05 | 0.003419104 | Ttc9     | tetratricopeptide repeat domain 9                       | protein_coding       | 69480  | -   |
| ENSMUSG00000045613 | 9.29   | 7.519  | 2.91   | 0.000435875 | 0.026191894 | Chrm2    | cholinergic receptor, muscarinic 2, cardiac             | protein_coding       | 243764 | -   |
| ENSMUSG00000046580 | 6.88   | 0.074  | -3.766 | 7.79457E-05 | 0.008120205 | Gm7862   | -                                                       | processed_pseudogene | -      | -   |
| ENSMUSG00000046637 | 4.68   | 19.503 | 4.286  | 6.3468E-05  | 0.006929899 | Ttc34    | tetratricopeptide repeat domain 34                      | protein_coding       | 242800 | -   |

|                    |              |            |        |             |             |                   |                                                                      |                |        |         |
|--------------------|--------------|------------|--------|-------------|-------------|-------------------|----------------------------------------------------------------------|----------------|--------|---------|
| ENSMUSG00000047250 | 45.61        | 5.024      | 2.329  | 6.61418E-07 | 0.000472522 | Ptgs1             | prostaglandin-endoperoxide synthase 1                                | protein_coding | 19224  | -       |
| ENSMUSG00000048965 | 10.62        | 0.109      | -3.204 | 0.000320043 | 0.020785271 | Mrgpre            | MAS-related GPR, member E                                            | protein_coding | 244238 | -       |
| ENSMUSG00000049001 | 6.24         | 6.822      | 2.77   | 0.000980489 | 0.042310195 | Ndnf              | neuron-derived neurotrophic factor                                   | protein_coding | 68169  | -       |
| ENSMUSG00000050345 | 125.91       | 4.529      | 2.179  | 1.42978E-05 | 0.002730589 | 4930486<br>L24Rik | RIKEN cDNA 4930486L24 gene                                           | protein_coding | 214639 | -       |
| ENSMUSG00000050394 | 13.68        | 4.062      | 2.022  | 0.001222308 | 0.047920946 | Armcx6            | armadillo repeat containing, X-linked 6                              | protein_coding | 278097 | -       |
| ENSMUSG00000051855 | 310.9        | 4.619      | 2.208  | 1.12398E-05 | 0.002492009 | Mest              | mesoderm specific transcript                                         | protein_coding | 17294  | -       |
| ENSMUSG00000052188 | 4.11         | 0.018      | -5.784 | 0.000733354 | 0.035631402 | Gm1496<br>4       | -                                                                    | antisense_RNA  | -      | -       |
| ENSMUSG00000052270 | 44.38        | 4.328      | 2.114  | 5.50539E-06 | 0.001712797 | Fpr2              | formyl peptide receptor 2                                            | protein_coding | 14289  | -       |
| ENSMUSG00000053684 | 14.77        | 0.146      | -2.777 | 9.53957E-05 | 0.009065447 | BC0484<br>03      | cDNA sequence BC048403                                               | protein_coding | 270802 | -       |
| ENSMUSG00000053965 | 30.2         | 4.106      | 2.038  | 2.71875E-06 | 0.00109254  | Pde5a             | phosphodiesterase 5A, cGMP-specific                                  | protein_coding | 242202 | -       |
| ENSMUSG00000054976 | 18.51        | 4.032      | 2.011  | 0.000295464 | 0.019780643 | Nyap2             | neuronal tyrosine-phosphorylated phosphoinositide 3-kinase adaptor 2 | protein_coding | 241134 | -       |
| ENSMUSG00000055745 | 13.96        | 0.172      | -2.542 | 0.001197174 | 0.047778322 | Ldoc11            | retrotransposon Gag like 6                                           | protein_coding | 223732 | -       |
| ENSMUSG00000055963 | 24.25        | 6.521      | 2.705  | 6.20648E-05 | 0.006880278 | Triqk             | triple QxxK/R motif containing                                       | protein_coding | 208820 | -       |
| ENSMUSG00000056004 | 22.21        | 4.072      | 2.026  | 0.001208279 | 0.047778322 | 9330182<br>L06Rik | RIKEN cDNA 9330182L06 gene                                           | protein_coding | 231014 | -       |
| ENSMUSG00000056025 | 11.87        | 6.039      | 2.594  | 0.000170504 | 0.01345527  | Clca3a1           | chloride channel accessory 3A1                                       | protein_coding | 12722  | -       |
| ENSMUSG00000056492 | 30.07        | 14.33<br>8 | 3.842  | 4.11515E-05 | 0.005088095 | Adgrf5            | adhesion G protein-coupled receptor F5                               | protein_coding | 224792 | -       |
| ENSMUSG00000057337 | 193.24       | 0.191      | -2.387 | 9.4182E-10  | 3.0278E-06  | Chst3             | carbohydrate sulfotransferase 3                                      | protein_coding | 53374  | -       |
| ENSMUSG00000058626 | 79.62        | 5.182      | 2.374  | 4.49178E-06 | 0.001507439 | Capn11            | calpain 11                                                           | protein_coding | 268958 | -       |
| ENSMUSG00000060594 | 26.63        | 6.233      | 2.64   | 1.06919E-05 | 0.002426299 | Layn              | layilin                                                              | protein_coding | 244864 | -       |
| ENSMUSG00000061132 | 90.24        | 0.243      | -2.044 | 1.13152E-07 | 0.000155899 | Blnk              | B cell linker                                                        | protein_coding | 17060  | -       |
| ENSMUSG00000062345 | 19.01        | 4.665      | 2.222  | 9.5406E-05  | 0.009065447 | Serpinb2          | serine (or cysteine) peptidase inhibitor, clade B, member 2          | protein_coding | 18788  | -       |
| ENSMUSG00000064337 | 23511.2<br>2 | 4.903      | 2.294  | 0.000240095 | 0.016658932 | mt-Rnr1           | -                                                                    | Mt_rRNA        | -      | -       |
| ENSMUSG00000066838 | 6.01         | 0.056      | -4.146 | 0.000375481 | 0.023288259 | Zfp772            | zinc finger protein 772                                              | protein_coding | 232855 | zf-C2H2 |
| ENSMUSG00000067341 | 52.43        | 0.214      | -2.227 | 1.7475E-05  | 0.003036721 | H2-Eb2            | histocompatibility 2, class II antigen E beta2                       | protein_coding | 381091 | -       |

|                    |         |        |        |             |             |               |                                                        |                        |           |   |
|--------------------|---------|--------|--------|-------------|-------------|---------------|--------------------------------------------------------|------------------------|-----------|---|
| ENSMUSG00000068105 | 89.02   | 0.171  | -2.551 | 3.40657E-11 | 2.31589E-07 | Tnfrsf13c     | tumor necrosis factor receptor superfamily, member 13c | protein_coding         | 72049     | - |
| ENSMUSG00000069306 | 116.25  | 4.169  | 2.06   | 6.67319E-06 | 0.001865496 | Hist1h4m      | histone cluster 1, H4m                                 | protein_coding         | 100041230 | - |
| ENSMUSG00000071745 | 3.42    | 63.701 | 5.993  | 2.66102E-05 | 0.0037466   | DXBay18       | DNA segment, Chr X, Baylor 18                          | protein_coding         | 574405    | - |
| ENSMUSG00000073421 | 1081.55 | 0.182  | -2.459 | 4.90557E-07 | 0.000394265 | H2-Ab1        | histocompatibility 2, class II antigen A, beta 1       | protein_coding         | 14961     | - |
| ENSMUSG00000076501 | 12.26   | 0.174  | -2.523 | 0.001071348 | 0.044496936 | Igkv2-137     | -                                                      | IG_V_gene              | -         | - |
| ENSMUSG00000076508 | 16.48   | 0.173  | -2.534 | 8.30572E-05 | 0.008470694 | Igkv17-127    | -                                                      | IG_V_gene              | -         | - |
| ENSMUSG00000076538 | 12.27   | 0.081  | -3.635 | 1.10848E-05 | 0.002486228 | Igkv13-84     | -                                                      | IG_V_gene              | -         | - |
| ENSMUSG00000076540 | 7.48    | 0.125  | -3.001 | 0.001057987 | 0.04424113  | Igkv4-80      | -                                                      | IG_V_gene              | -         | - |
| ENSMUSG00000076545 | 17.89   | 0.164  | -2.604 | 0.000476691 | 0.027529615 | Igkv4-72      | -                                                      | IG_V_gene              | -         | - |
| ENSMUSG00000076550 | 11.48   | 0.094  | -3.407 | 4.31733E-05 | 0.005233308 | Igkv4-63      | -                                                      | IG_V_gene              | -         | - |
| ENSMUSG00000076618 | 27.26   | 0.23   | -2.117 | 0.000347061 | 0.021949018 | Ighj4         | -                                                      | IG_J_gene              | -         | - |
| ENSMUSG00000076621 | 21.94   | 0.233  | -2.104 | 9.11136E-05 | 0.008831609 | Ighj1         | -                                                      | IG_J_gene              | -         | - |
| ENSMUSG00000076646 | 3.7     | 0.02   | -5.644 | 0.000762226 | 0.03621324  | Ighv2-6-8     | -                                                      | IG_V_gene              | -         | - |
| ENSMUSG00000076870 | 13.35   | 7.52   | 2.911  | 0.000984191 | 0.042375126 | Trdj1         | -                                                      | TR_J_gene              | -         | - |
| ENSMUSG00000076934 | 18.64   | 0.22   | -2.184 | 0.00091051  | 0.040560809 | Iglv1         | -                                                      | IG_V_gene              | -         | - |
| ENSMUSG00000078810 | 144.85  | 4.546  | 2.185  | 9.48805E-07 | 0.000560002 | Gp6           | glycoprotein 6 (platelet)                              | protein_coding         | 243816    | - |
| ENSMUSG00000079001 | 4.85    | 8.526  | 3.092  | 0.001076324 | 0.044511349 | 4930404H24Rik | -                                                      | protein_coding         | -         | - |
| ENSMUSG00000079543 | 12.12   | 0.122  | -3.03  | 0.00021835  | 0.015833638 | Igkv13-85     | -                                                      | IG_V_gene              | -         | - |
| ENSMUSG00000080969 | 8.28    | 0.009  | -6.852 | 9.04473E-07 | 0.000560002 | Gm12372       | -                                                      | processed_pseudogene   | -         | - |
| ENSMUSG00000082141 | 7.13    | 0.138  | -2.856 | 0.000499055 | 0.028312556 | Gm11212       | -                                                      | unprocessed_pseudogene | -         | - |
| ENSMUSG00000084893 | 85.91   | 5.007  | 2.324  | 5.44724E-05 | 0.006254278 | Hba-ps4       | -                                                      | unprocessed_pseudogene | -         | - |
| ENSMUSG00000084970 | 21.49   | 6.054  | 2.598  | 2.26772E-05 | 0.003499361 | 1700060J05Rik | -                                                      | antisense_RNA          | -         | - |
| ENSMUSG00000085971 | 22.95   | 0.229  | -2.124 | 0.000109663 | 0.010025102 | Gm15411       | -                                                      | processed_transcript   | -         | - |
| ENSMUSG00000086146 | 21.98   | 5.787  | 2.533  | 3.83052E-05 | 0.004860986 | Gm15729       | -                                                      | antisense_RNA          | -         | - |

|                    |        |        |        |             |             |               |                                                          |                      |           |   |
|--------------------|--------|--------|--------|-------------|-------------|---------------|----------------------------------------------------------|----------------------|-----------|---|
| ENSMUSG00000086199 | 61.32  | 4.839  | 2.275  | 0.000688497 | 0.034366479 | Bcas3os1      | breast carcinoma amplified sequence 3, opposite strand 1 | antisense_RNA        | 71489     | - |
| ENSMUSG00000086245 | 52.64  | 0.22   | -2.183 | 1.05879E-06 | 0.000600676 | Gm16170       | -                                                        | antisense_RNA        | -         | - |
| ENSMUSG00000086425 | 54.88  | 10.689 | 3.418  | 0.000750722 | 0.035843242 | F730016J06Rik | -                                                        | lincRNA              | -         | - |
| ENSMUSG00000087626 | 24.2   | 4.869  | 2.284  | 0.000448221 | 0.026513092 | Gm15050       | predicted gene 15050                                     | antisense_RNA        | 100504154 | - |
| ENSMUSG00000087684 | 3.44   | 14.071 | 3.815  | 0.000643196 | 0.03343592  | 1200007C13Rik | -                                                        | lincRNA              | -         | - |
| ENSMUSG00000089656 | 8.37   | 7.19   | 2.846  | 0.000145013 | 0.012175024 | Gm16271       | -                                                        | antisense_RNA        | -         | - |
| ENSMUSG00000092035 | 44.31  | 4.042  | 2.015  | 0.000264626 | 0.018124109 | Peg10         | paternally expressed 10                                  | protein_coding       | 170676    | - |
| ENSMUSG00000093327 | 379.72 | 0.201  | -2.317 | 6.30401E-09 | 1.32396E-05 | Mir5107       | microRNA 5107                                            | miRNA                | 100628611 | - |
| ENSMUSG00000093598 | 12.1   | 6.164  | 2.624  | 9.3933E-05  | 0.0090452   | A730085K08Rik | -                                                        | antisense_RNA        | -         | - |
| ENSMUSG00000094117 | 15.41  | 0.219  | -2.191 | 0.000799667 | 0.037621407 | Igkv3-12      | -                                                        | IG_V_gene            | -         | - |
| ENSMUSG00000094124 | 6.01   | 0.088  | -3.506 | 0.001253274 | 0.049035279 | Ighv1-74      | -                                                        | IG_V_gene            | -         | - |
| ENSMUSG00000094157 | 28.75  | 0.031  | -4.993 | 0.000973709 | 0.042206463 | Gm7995        | predicted gene 7995                                      | protein_coding       | 666233    | - |
| ENSMUSG00000094198 | 3.55   | 0.021  | -5.586 | 0.000994313 | 0.042715578 | Ighv1-50      | -                                                        | IG_V_gene            | -         | - |
| ENSMUSG00000094344 | 60.84  | 0.14   | -2.832 | 0.000705448 | 0.034890728 | Gm11942       | -                                                        | processed_pseudogene | -         | - |
| ENSMUSG00000094420 | 35.97  | 0.248  | -2.009 | 6.17972E-06 | 0.001833855 | Igkv10-96     | -                                                        | IG_V_gene            | -         | - |
| ENSMUSG00000094561 | 5.18   | 0.014  | -6.121 | 0.000201804 | 0.015029367 | Ighv1-22      | -                                                        | IG_V_gene            | -         | - |
| ENSMUSG00000094985 | 4.7    | 9.798  | 3.293  | 0.000834702 | 0.038662322 | Topaz1        | testis and ovary specific PAZ domain containing 1        | protein_coding       | 671232    | - |
| ENSMUSG00000095197 | 5.05   | 0.06   | -4.064 | 0.000626154 | 0.032731416 | Ighv1-59      | -                                                        | IG_V_gene            | -         | - |
| ENSMUSG00000095204 | 3.41   | 0.02   | -5.615 | 0.000875969 | 0.039719154 | Ighv1-52      | -                                                        | IG_V_gene            | -         | - |
| ENSMUSG00000095280 | 7.28   | 18.548 | 4.213  | 8.34378E-05 | 0.008470694 | Gm21738       | -                                                        | protein_coding       | -         | - |
| ENSMUSG00000095612 | 8.47   | 0.063  | -3.983 | 0.000448792 | 0.026513092 | Ighv5-4       | -                                                        | IG_V_gene            | -         | - |
| ENSMUSG00000095771 | 16.43  | 0.177  | -2.497 | 0.00016689  | 0.013302233 | Igkv14-111    | -                                                        | IG_V_gene            | -         | - |
| ENSMUSG00000096490 | 14.07  | 0.086  | -3.539 | 7.10059E-06 | 0.001929061 | Igkv10-94     | -                                                        | IG_V_gene            | -         | - |
| ENSMUSG00000096515 | 5.54   | 0.051  | -4.288 | 0.000457904 | 0.026690282 | Igkv14-100    | -                                                        | IG_V_gene            | -         | - |



|                    |        |       |        |             |             |               |   |                                    |   |   |
|--------------------|--------|-------|--------|-------------|-------------|---------------|---|------------------------------------|---|---|
| ENSMUSG00000096638 | 7.43   | 0.01  | -6.679 | 9.70657E-06 | 0.002340375 | Ighv2-9       | - | IG_V_gene                          | - | - |
| ENSMUSG00000096715 | 22.14  | 0.225 | -2.149 | 0.001184003 | 0.047382216 | Igkv3-4       | - | IG_V_gene                          | - | - |
| ENSMUSG00000097133 | 5.99   | 0.012 | -6.382 | 0.00026497  | 0.018124109 | Gm26628       | - | antisense_RNA                      | - | - |
| ENSMUSG00000097174 | 5.06   | 0.061 | -4.033 | 0.000755043 | 0.035960546 | Gm4890        | - | bidirectional_promoter_lincRNA     | - | - |
| ENSMUSG00000098537 | 20.02  | 4.438 | 2.15   | 0.00073107  | 0.03561012  | Gm27867       | - | misc_RNA                           | - | - |
| ENSMUSG00000101308 | 243.96 | 4.071 | 2.025  | 4.53271E-06 | 0.001507439 | Gm28989       | - | antisense_RNA                      | - | - |
| ENSMUSG00000102817 | 8.13   | 7.215 | 2.851  | 0.000630154 | 0.032851473 | Gm6185        | - | transcribed_unprocessed_pseudogene | - | - |
| ENSMUSG00000104213 | 716.04 | 0.145 | -2.784 | 2.01602E-10 | 7.7774E-07  | Ighd          | - | IG_C_gene                          | - | - |
| ENSMUSG00000105703 | 39.19  | 0.092 | -3.436 | 0.000262231 | 0.018064938 | Gm43305       | - | processed_transcript               | - | - |
| ENSMUSG00000105901 | 12.7   | 0.153 | -2.707 | 0.000492598 | 0.028028679 | Gm7291        | - | processed_pseudogene               | - | - |
| ENSMUSG00000107528 | 43.86  | 4.044 | 2.016  | 1.14069E-06 | 0.000611188 | Gm44442       | - | lincRNA                            | - | - |
| ENSMUSG00000108854 | 12.66  | 4.463 | 2.158  | 0.00105964  | 0.04424113  | D830036C21Rik | - | lincRNA                            | - | - |
| ENSMUSG00000109799 | 33.95  | 0.195 | -2.36  | 3.59147E-06 | 0.001332229 | Gm45515       | - | antisense_RNA                      | - | - |
| ENSMUSG00000110575 | 30.34  | 0.25  | -2.002 | 0.001033619 | 0.043531618 | 6330537M06Rik | - | TEC                                | - | - |
| ENSMUSG00000110631 | 23.53  | 8.069 | 3.012  | 3.48394E-05 | 0.004540652 | Gm42047       | - | lincRNA                            | - | - |
| ENSMUSG00000112063 | 17.81  | 0.146 | -2.774 | 4.34097E-05 | 0.005233308 | AC161114.1    | - | processed_pseudogene               | - | - |

**Supplementary Table 2 (B):** List of differentially expressed genes in HD group using edgeR software (two-tailed p-value calculation using Wald statistics and Log2 fold change by maximum-likelihood estimate).

| Control vs HD      |          |       |                |             |             |           |                                                                                                   |                |           |           |
|--------------------|----------|-------|----------------|-------------|-------------|-----------|---------------------------------------------------------------------------------------------------|----------------|-----------|-----------|
| Id                 | baseMean | FC    | log2FoldChange | pvalue      | padj        | gene_name | gene_description                                                                                  | gene_biotype   | Entrez_id | TF_Family |
| ENSMUSG0000000028  | 14.03    | 5.641 | 2.496          | 0.003170837 | 0.010748305 | Cdc45     | cell division cycle 45                                                                            | protein_coding | 12544     | -         |
| ENSMUSG0000000049  | 24.18    | 4.879 | 2.287          | 6.64828E-06 | 7.14492E-05 | ApoH      | apolipoprotein H                                                                                  | protein_coding | 11818     | -         |
| ENSMUSG0000000127  | 341.15   | 4.798 | 2.262          | 4.76205E-08 | 1.2069E-06  | Fer       | fer (fms/fps related) protein kinase                                                              | protein_coding | 14158     | -         |
| ENSMUSG0000000157  | 5.78     | 8.752 | 3.13           | 0.004757099 | 0.014921833 | Itgb2l    | integrin beta 2-like                                                                              | protein_coding | 16415     | -         |
| ENSMUSG0000000159  | 18.24    | 4.979 | 2.316          | 1.27306E-05 | 0.000122146 | Igsf5     | immunoglobulin superfamily, member 5                                                              | protein_coding | 72058     | -         |
| ENSMUSG0000000202  | 5.31     | 6.237 | 2.641          | 0.003565792 | 0.011819539 | Btbd17    | BTB (POZ) domain containing 17                                                                    | protein_coding | 72014     | -         |
| ENSMUSG0000000204  | 1196.78  | 4.686 | 2.228          | 0.000117552 | 0.000741934 | Slnf4     | schlafen 4                                                                                        | protein_coding | 20558     | -         |
| ENSMUSG0000000244  | 123.59   | 0.172 | -2.543         | 5.98052E-13 | 9.42666E-11 | Tspan32   | tetraspanin 32                                                                                    | protein_coding | 27027     | -         |
| ENSMUSG0000000266  | 10.85    | 5.893 | 2.559          | 0.000398178 | 0.001992996 | Mid2      | midline 2                                                                                         | protein_coding | 23947     | -         |
| ENSMUSG0000000295  | 11.88    | 0.153 | -2.711         | 0.000747289 | 0.003315562 | Hddc2     | HD domain containing 2                                                                            | protein_coding | 69692     | -         |
| ENSMUSG0000000320  | 966.48   | 5.292 | 2.404          | 2.78415E-08 | 7.85376E-07 | Alox12    | arachidonate 12-lipoxygenase                                                                      | protein_coding | 11684     | -         |
| ENSMUSG0000000385  | 7.18     | 4.426 | 2.146          | 0.007129196 | 0.020672023 | Tmprss2   | transmembrane protease, serine 2                                                                  | protein_coding | 50528     | -         |
| ENSMUSG0000000409  | 227.85   | 0.183 | -2.454         | 1.31697E-08 | 4.28708E-07 | Lck       | lymphocyte protein tyrosine kinase                                                                | protein_coding | 16818     | -         |
| ENSMUSG0000000567  | 3.74     | 9.781 | 3.29           | 0.000690838 | 0.003114318 | Sox9      | SRY (sex determining region Y)-box 9                                                              | protein_coding | 20682     | HMG       |
| ENSMUSG0000000581  | 19.23    | 0.205 | -2.286         | 7.10428E-05 | 0.000495104 | C1d       | C1D nuclear receptor co-repressor                                                                 | protein_coding | 57316     | -         |
| ENSMUSG0000000782  | 302.38   | 0.175 | -2.514         | 7.23095E-11 | 5.52906E-09 | Tcf7      | transcription factor 7, T cell specific                                                           | protein_coding | 21414     | HMG       |
| ENSMUSG0000000823  | 17.8     | 0.247 | -2.018         | 0.000148437 | 0.000899649 | Zfp512b   | zinc finger protein 512B                                                                          | protein_coding | 269401    | zf-C2H2   |
| ENSMUSG0000000902  | 24.17    | 0.197 | -2.342         | 4.26313E-06 | 5.01336E-05 | Smarb1    | SWI/SNF related, matrix associated, actin dependent regulator of chromatin, subfamily b, member 1 | protein_coding | 20587     | -         |
| ENSMUSG0000000903  | 22.67    | 0.088 | -3.512         | 2.22001E-11 | 2.01472E-09 | Vpreb3    | pre-B lymphocyte gene 3                                                                           | protein_coding | 22364     | -         |
| ENSMUSG00000001014 | 10.17    | 8.837 | 3.144          | 0.000102781 | 0.000668427 | Icam4     | intercellular adhesion molecule 4, Landsteiner-Wiener blood group                                 | protein_coding | 78369     | -         |

|                    |        |       |        |             |             |         |                                                                                   |                |        |          |
|--------------------|--------|-------|--------|-------------|-------------|---------|-----------------------------------------------------------------------------------|----------------|--------|----------|
| ENSMUSG00000001016 | 17.55  | 0.244 | -2.034 | 0.000239662 | 0.001319792 | Iif2    | interleukin enhancer binding factor 2                                             | protein_coding | 67781  | -        |
| ENSMUSG00000001020 | 57.23  | 0.164 | -2.608 | 6.33897E-09 | 2.37797E-07 | S100a4  | S100 calcium binding protein A4                                                   | protein_coding | 20198  | -        |
| ENSMUSG00000001027 | 23.97  | 0.145 | -2.786 | 5.20712E-07 | 8.91112E-06 | Scn4a   | sodium channel, voltage-gated, type IV, alpha                                     | protein_coding | 110880 | -        |
| ENSMUSG00000001029 | 47.14  | 0.138 | -2.856 | 5.38619E-12 | 6.01146E-10 | Icam2   | intercellular adhesion molecule 2                                                 | protein_coding | 15896  | -        |
| ENSMUSG00000001056 | 30.99  | 0.183 | -2.446 | 1.34902E-08 | 4.36768E-07 | Nhp2    | NHP2 ribonucleoprotein                                                            | protein_coding | 52530  | -        |
| ENSMUSG00000001100 | 18.12  | 0.189 | -2.406 | 9.76717E-05 | 0.000641002 | Poldip2 | polymerase (DNA-directed), delta interacting protein 2                            | protein_coding | 67811  | -        |
| ENSMUSG00000001227 | 28.07  | 4.063 | 2.023  | 6.84387E-05 | 0.000479445 | Sema6b  | sema domain, transmembrane domain I, and cytoplasmic domain 19aladin19izaorin) 6B | protein_coding | 20359  | -        |
| ENSMUSG00000001348 | 159.23 | 0.128 | -2.968 | 7.22913E-18 | 3.09286E-15 | Acp5    | acid phosphatase 5, tartrate resistant                                            | protein_coding | 11433  | -        |
| ENSMUSG00000001380 | 22.44  | 0.177 | -2.496 | 6.36929E-07 | 1.04808E-05 | Hars    | histidyl-tRNA synthetase                                                          | protein_coding | 15115  | -        |
| ENSMUSG00000001415 | 79.42  | 0.245 | -2.03  | 1.02297E-07 | 2.29198E-06 | Smg5    | Smg-5 homolog, nonsense mediated mRNA decay factor (C. elegans)                   | protein_coding | 229512 | -        |
| ENSMUSG00000001435 | 22.3   | 5.153 | 2.365  | 0.000277623 | 0.001484263 | Col18a1 | collagen, type XVIII, alpha 1                                                     | protein_coding | 12822  | -        |
| ENSMUSG00000001496 | 7.68   | 8.264 | 3.047  | 0.000492637 | 0.002366897 | Nkx2-1  | NK2 homeobox 1                                                                    | protein_coding | 21869  | Homeobox |
| ENSMUSG00000001506 | 6.93   | 4.573 | 2.193  | 0.001726444 | 0.00658116  | Col1a1  | collagen, type I, alpha 1                                                         | protein_coding | 12842  | -        |
| ENSMUSG00000001507 | 6.4    | 4.595 | 2.2    | 0.013145137 | 0.033590012 | Itga3   | integrin alpha 3                                                                  | protein_coding | 16400  | -        |
| ENSMUSG00000001518 | 8.56   | 0.034 | -4.861 | 1.25573E-07 | 2.68302E-06 | Itfg2   | integrin alpha FG-GAP repeat containing 2                                         | protein_coding | 101142 | -        |
| ENSMUSG00000001520 | 10.29  | 0.153 | -2.707 | 2.07754E-05 | 0.000183627 | Nrip2   | nuclear receptor interacting protein 2                                            | protein_coding | 60345  | -        |
| ENSMUSG00000001666 | 7.98   | 0.199 | -2.326 | 0.004882481 | 0.015244709 | Ddt     | D-dopachrome tautomerase                                                          | protein_coding | 13202  | -        |
| ENSMUSG00000001700 | 82.23  | 0.17  | -2.554 | 3.54675E-11 | 2.96425E-09 | Gramd3  | GRAM domain containing 3                                                          | protein_coding | 107022 | -        |
| ENSMUSG00000001707 | 10.8   | 0.248 | -2.009 | 0.004620969 | 0.014541889 | Eef1e1  | eukaryotic translation elongation factor 1 epsilon 1                              | protein_coding | 66143  | -        |
| ENSMUSG00000001755 | 9.63   | 0.196 | -2.354 | 0.000295473 | 0.001561572 | Coasy   | Coenzyme A synthase                                                               | protein_coding | 71743  | -        |
| ENSMUSG00000001783 | 90.82  | 0.143 | -2.807 | 3.93629E-11 | 3.24455E-09 | Rtcb    | RNA 5',3'-cyclic phosphate and 5'-OH ligase                                       | protein_coding | 28088  | -        |
| ENSMUSG00000001802 | 7.03   | 8.168 | 3.03   | 0.002185372 | 0.007981495 | Lrp3    | low density lipoprotein receptor-related protein 3                                | protein_coding | 435965 | -        |
| ENSMUSG00000001815 | 7.71   | 6.226 | 2.638  | 0.000186166 | 0.001076962 | Evx2    | even-skipped homeobox 2                                                           | protein_coding | 14029  | Homeobox |
| ENSMUSG00000001870 | 58.93  | 5.099 | 2.35   | 6.87712E-10 | 3.71096E-08 | Ltbp1   | latent transforming growth factor beta binding protein 1                          | protein_coding | 268977 | -        |

|                    |        |       |        |             |             |        |                                                                           |                |        |   |
|--------------------|--------|-------|--------|-------------|-------------|--------|---------------------------------------------------------------------------|----------------|--------|---|
| ENSMUSG00000001943 | 67.17  | 6.485 | 2.697  | 1.87511E-10 | 1.19482E-08 | Vsig2  | V-set and immunoglobulin domain containing 2                              | protein_coding | 57276  | - |
| ENSMUSG00000001946 | 113.25 | 4.548 | 2.185  | 4.60104E-08 | 1.17438E-06 | Esam   | endothelial cell-specific adhesion molecule                               | protein_coding | 69524  | - |
| ENSMUSG00000001948 | 18.47  | 9.068 | 3.181  | 1.66312E-07 | 3.40372E-06 | Spa17  | sperm autoantigenic protein 17                                            | protein_coding | 20686  | - |
| ENSMUSG00000001983 | 13.64  | 0.199 | -2.327 | 4.24681E-05 | 0.000326953 | Taco1  | translational activator of mitochondrially encoded cytochrome c oxidase I | protein_coding | 70207  | - |
| ENSMUSG00000002007 | 16.81  | 0.062 | -4.013 | 3.55138E-09 | 1.48062E-07 | Srpk3  | serine/arginine-rich protein specific kinase 3                            | protein_coding | 56504  | - |
| ENSMUSG00000002033 | 166.78 | 0.163 | -2.613 | 3.16056E-12 | 3.73632E-10 | Cd3g   | CD3 antigen, gamma polypeptide                                            | protein_coding | 12502  | - |
| ENSMUSG00000002068 | 17.82  | 0.2   | -2.324 | 2.21947E-05 | 0.000193038 | Ccne1  | cyclin E1                                                                 | protein_coding | 12447  | - |
| ENSMUSG00000002109 | 20.61  | 0.201 | -2.314 | 2.72758E-05 | 0.00022874  | Ddb2   | damage specific DNA binding protein 2                                     | protein_coding | 107986 | - |
| ENSMUSG00000002129 | 26.64  | 0.144 | -2.796 | 1.75093E-06 | 2.41738E-05 | Sf3a1  | splicing factor 3a, subunit 1                                             | protein_coding | 67465  | - |
| ENSMUSG00000002228 | 8.52   | 0.127 | -2.973 | 0.000334433 | 0.001729331 | Ppm1j  | protein phosphatase 1J                                                    | protein_coding | 71887  | - |
| ENSMUSG00000002329 | 43.99  | 0.199 | -2.333 | 6.90625E-10 | 3.71552E-08 | Mdp1   | magnesium-dependent phosphatase 1                                         | protein_coding | 67881  | - |
| ENSMUSG00000002416 | 20.54  | 0.166 | -2.594 | 3.63761E-06 | 4.40757E-05 | Ndufb2 | NADH:ubiquinone oxidoreductase subunit B2                                 | protein_coding | 68198  | - |
| ENSMUSG00000002475 | 9.85   | 4.862 | 2.282  | 0.000785938 | 0.003458861 | Abhd3  | abhydrolase domain containing 3                                           | protein_coding | 106861 | - |
| ENSMUSG00000002565 | 9.88   | 4.733 | 2.243  | 0.004488964 | 0.014228647 | Scin   | scinderin                                                                 | protein_coding | 20259  | - |
| ENSMUSG00000002633 | 9.84   | 5.054 | 2.337  | 0.002530017 | 0.008959771 | Shh    | sonic hedgehog                                                            | protein_coding | 20423  | - |
| ENSMUSG00000002660 | 23.83  | 0.152 | -2.72  | 3.72356E-05 | 0.000293588 | Clpp   | caseinolytic mitochondrial matrix peptidase proteolytic subunit           | protein_coding | 53895  | - |
| ENSMUSG00000002718 | 26.94  | 0.245 | -2.029 | 5.00574E-06 | 5.70375E-05 | Cse11  | chromosome segregation 1-like (S. cerevisiae)                             | protein_coding | 110750 | - |
| ENSMUSG00000002767 | 17.69  | 0.089 | -3.494 | 8.85953E-08 | 2.0126E-06  | Mrpl2  | mitochondrial ribosomal protein L2                                        | protein_coding | 27398  | - |
| ENSMUSG00000002797 | 13.24  | 0.12  | -3.06  | 3.0206E-05  | 0.000247389 | Ggct   | gamma-glutamyl cyclotransferase                                           | protein_coding | 110175 | - |
| ENSMUSG00000002870 | 16.81  | 0.214 | -2.221 | 0.000248042 | 0.001358033 | Mcm2   | minichromosome maintenance complex component 2                            | protein_coding | 17216  | - |
| ENSMUSG00000002871 | 21.75  | 0.234 | -2.096 | 0.0001905   | 0.001097852 | Tpra1  | transmembrane protein, adipoc20aladin20ized 1                             | protein_coding | 24100  | - |
| ENSMUSG00000002949 | 26.97  | 0.169 | -2.566 | 3.52255E-08 | 9.47555E-07 | Timm44 | translocase of inner mitochondrial membrane 44                            | protein_coding | 21856  | - |
| ENSMUSG00000003072 | 87.4   | 0.236 | -2.08  | 1.06172E-07 | 2.356E-06   | Atp5d  | ATP synthase, H+ transporting, mitochondrial F1 complex, delta subunit    | protein_coding | 66043  | - |

|                    |         |       |        |             |             |          |                                                                                 |                |        |         |
|--------------------|---------|-------|--------|-------------|-------------|----------|---------------------------------------------------------------------------------|----------------|--------|---------|
| ENSMUSG00000003099 | 38.1    | 0.194 | -2.364 | 5.05808E-08 | 1.2694E-06  | Ppp5c    | protein phosphatase 5, catalytic subunit                                        | protein_coding | 19060  | -       |
| ENSMUSG00000003153 | 663.85  | 4.805 | 2.265  | 5.1496E-08  | 1.28876E-06 | Slc2a3   | solute carrier family 2 (facilitated glucose transporter), member 3             | protein_coding | 20527  | -       |
| ENSMUSG00000003184 | 39.16   | 0.159 | -2.655 | 1.87382E-07 | 3.78323E-06 | Irf3     | interferon regulatory factor 3                                                  | protein_coding | 54131  | IRF     |
| ENSMUSG00000003190 | 18.93   | 0.182 | -2.458 | 1.34583E-06 | 1.92849E-05 | Bcl2l12  | BCL2-like 12 (proline rich)                                                     | protein_coding | 75736  | -       |
| ENSMUSG00000003227 | 6.9     | 4.169 | 2.06   | 0.003333071 | 0.01118861  | Edar     | ectodysplasin-A receptor                                                        | protein_coding | 13608  | -       |
| ENSMUSG00000003341 | 6.04    | 8.069 | 3.012  | 3.78645E-05 | 0.000297372 | Atp8b3   | ATPase, class I, type 8B, member 3                                              | protein_coding | 67331  | -       |
| ENSMUSG00000003379 | 485.66  | 0.014 | -6.132 | 1.18412E-22 | 8.511E-20   | Cd79a    | CD79A antigen (immunoglobulin-associated alpha)                                 | protein_coding | 12518  | -       |
| ENSMUSG00000003411 | 8.51    | 4.215 | 2.076  | 0.010155103 | 0.027444283 | Rab3b    | RAB3B, member RAS oncogene family                                               | protein_coding | 69908  | -       |
| ENSMUSG00000003429 | 812.84  | 0.222 | -2.169 | 4.24934E-09 | 1.72752E-07 | Rps11    | ribosomal protein S11                                                           | protein_coding | 27207  | -       |
| ENSMUSG00000003528 | 14.59   | 0.237 | -2.074 | 0.000807424 | 0.0035456   | Slc25a1  | solute carrier family 25 (mitochondrial carrier, citrate transporter), member 1 | protein_coding | 13358  | -       |
| ENSMUSG00000003848 | 30.77   | 0.236 | -2.081 | 0.000117713 | 0.000742168 | Nob1     | NIN1/RPN12 binding protein 1 homolog                                            | protein_coding | 67619  | -       |
| ENSMUSG00000003923 | 36.41   | 0.121 | -3.043 | 1.77403E-08 | 5.45849E-07 | Tfam     | transcription factor A, mitochondrial                                           | protein_coding | 21780  | HMG     |
| ENSMUSG00000003948 | 1672.27 | 5.258 | 2.395  | 8.70226E-08 | 1.98692E-06 | Mmd      | monocyte to macrophage differentiation-associated                               | protein_coding | 67468  | -       |
| ENSMUSG00000003949 | 7.25    | 4.388 | 2.134  | 0.016836964 | 0.041009297 | Hlf      | hepatic leukemia factor                                                         | protein_coding | 217082 | TF_bZIP |
| ENSMUSG00000003955 | 14.1    | 0.214 | -2.222 | 6.68776E-05 | 0.000469974 | Fam162a  | family with sequence similarity 162, member A                                   | protein_coding | 70186  | -       |
| ENSMUSG00000004031 | 12.05   | 4.099 | 2.035  | 0.003365729 | 0.011285462 | Brinp2   | bone morphogenic protein/retinoic acid inducible neural-specific 2              | protein_coding | 240843 | -       |
| ENSMUSG00000004044 | 18.18   | 9.133 | 3.191  | 5.96614E-07 | 9.88784E-06 | Cavin1   | caveolae associated 1                                                           | protein_coding | 19285  | -       |
| ENSMUSG00000004085 | 23.27   | 4.575 | 2.194  | 1.63187E-07 | 3.35227E-06 | Map3k20  | mitogen-activated protein kinase kinase kinase 20                               | protein_coding | 65964  | -       |
| ENSMUSG00000004100 | 15.6    | 0.19  | -2.394 | 7.38686E-05 | 0.000510139 | Ppan     | peter pan homolog                                                               | protein_coding | 235036 | -       |
| ENSMUSG00000004231 | 17.61   | 5.372 | 2.425  | 5.07592E-06 | 5.7618E-05  | Pax2     | paired box 2                                                                    | protein_coding | 18504  | PAX     |
| ENSMUSG00000004268 | 100.06  | 0.169 | -2.563 | 7.69832E-13 | 1.19251E-10 | Emg1     | EMG1 N1-specific pseudouridine methyltransferase                                | protein_coding | 14791  | -       |
| ENSMUSG00000004393 | 13.52   | 0.196 | -2.352 | 0.000346051 | 0.001776119 | Ddx56    | DEAD (Asp-Glu-Ala-Asp) box polypeptide 56                                       | protein_coding | 52513  | -       |
| ENSMUSG00000004562 | 7.67    | 5.662 | 2.501  | 0.003928172 | 0.012784882 | Arhgef40 | Rho guanine nucleotide exchange factor (GEF) 40                                 | protein_coding | 268739 | -       |
| ENSMUSG00000004631 | 17.22   | 4.233 | 2.082  | 0.001608373 | 0.00621925  | Sgce     | sarcoglycan, epsilon                                                            | protein_coding | 20392  | -       |

|                    |       |       |        |             |             |               |                                                                               |                |        |          |
|--------------------|-------|-------|--------|-------------|-------------|---------------|-------------------------------------------------------------------------------|----------------|--------|----------|
| ENSMUSG00000004788 | 24.7  | 0.249 | -2.009 | 0.00014523  | 0.000885526 | Eif2b2        | eukaryotic translation initiation factor 2B, subunit 2 beta                   | protein_coding | 217715 | -        |
| ENSMUSG00000004837 | 95.17 | 0.137 | -2.865 | 4.05489E-13 | 6.62385E-11 | Grap          | GRB2-related adaptor protein                                                  | protein_coding | 71520  | -        |
| ENSMUSG00000004872 | 15.75 | 6.454 | 2.69   | 3.33561E-06 | 4.08016E-05 | Pax3          | paired box 3                                                                  | protein_coding | 18505  | PAX      |
| ENSMUSG00000005089 | 17.06 | 6.347 | 2.666  | 1.80963E-06 | 2.47844E-05 | Slc1a2        | solute carrier family 1 (glial high affinity glutamate transporter), member 2 | protein_coding | 20511  | -        |
| ENSMUSG00000005204 | 35.86 | 0.158 | -2.663 | 3.10165E-09 | 1.33334E-07 | Senp3         | SUMO/sentrin specific peptidase 3                                             | protein_coding | 80886  | -        |
| ENSMUSG00000005268 | 14.98 | 4.385 | 2.133  | 0.004345559 | 0.01388703  | Prlr          | prolactin receptor                                                            | protein_coding | 19116  | -        |
| ENSMUSG00000005413 | 29.51 | 4.007 | 2.002  | 0.000391328 | 0.00196199  | Hmox1         | heme oxygenase 1                                                              | protein_coding | 15368  | -        |
| ENSMUSG00000005465 | 57.14 | 0.188 | -2.408 | 3.33945E-08 | 9.0632E-07  | Il27ra        | interleukin 27 receptor, alpha                                                | protein_coding | 50931  | -        |
| ENSMUSG00000005505 | 13.74 | 0.157 | -2.669 | 0.000100419 | 0.000655916 | Kbtbd4        | kelch repeat and BTB (POZ) domain containing 4                                | protein_coding | 67136  | -        |
| ENSMUSG00000005540 | 89.11 | 0.024 | -5.381 | 1.56673E-24 | 1.48172E-21 | Fcer2a        | Fc receptor, IgE, low affinity II, alpha polypeptide                          | protein_coding | 14128  | -        |
| ENSMUSG00000005611 | 94.89 | 5.986 | 2.582  | 1.67125E-14 | 4.05821E-12 | Mrv1l         | MRV integration site 1                                                        | protein_coding | 17540  | -        |
| ENSMUSG00000005672 | 10    | 4.62  | 2.208  | 0.001160736 | 0.004766284 | Kit           | KIT proto-oncogene receptor tyrosine kinase                                   | protein_coding | 16590  | -        |
| ENSMUSG00000005674 | 17.79 | 0.247 | -2.02  | 0.000333391 | 0.001725431 | Tomm40l       | translocase of outer mitochondrial membrane 40-like                           | protein_coding | 641376 | -        |
| ENSMUSG00000005677 | 11.96 | 0.229 | -2.13  | 0.000586645 | 0.002732352 | Nr1i3         | nuclear receptor subfamily 1, group I, member 3                               | protein_coding | 12355  | THR-like |
| ENSMUSG00000005696 | 22.9  | 0.158 | -2.666 | 3.72706E-08 | 9.9567E-07  | Sh2d1a        | SH2 domain containing 1A                                                      | protein_coding | 20400  | -        |
| ENSMUSG00000005718 | 9.56  | 0.237 | -2.076 | 0.002041516 | 0.007540391 | Tfap4         | transcription factor AP4                                                      | protein_coding | 83383  | bHLH     |
| ENSMUSG00000005732 | 32.76 | 0.225 | -2.152 | 5.87544E-07 | 9.78126E-06 | Ranbp1        | RAN binding protein 1                                                         | protein_coding | 19385  | -        |
| ENSMUSG00000005763 | 179.7 | 0.204 | -2.296 | 1.13342E-11 | 1.13147E-09 | Cd247         | CD247 antigen                                                                 | protein_coding | 12503  | -        |
| ENSMUSG00000005846 | 32.9  | 0.216 | -2.208 | 2.41539E-08 | 6.98909E-07 | Rsl1d1        | ribosomal L1 domain containing 1                                              | protein_coding | 66409  | -        |
| ENSMUSG00000005952 | 5.47  | 6.558 | 2.713  | 0.000711063 | 0.003190283 | Trpv1         | transient receptor potential cation channel, subfamily V, member 1            | protein_coding | 193034 | -        |
| ENSMUSG00000005958 | 4.73  | 9.684 | 3.276  | 0.000456195 | 0.002231789 | Ephb3         | Eph receptor B3                                                               | protein_coding | 13845  | -        |
| ENSMUSG00000006204 | 10.27 | 7.312 | 2.87   | 0.00164741  | 0.006340979 | 5430419d17Rik | RIKEN cDNA 5430419D17 gene                                                    | protein_coding | 71395  | -        |
| ENSMUSG00000006288 | 51.8  | 0.248 | -2.01  | 3.8491E-07  | 6.91644E-06 | Ttc5          | tetratricopeptide repeat domain 5                                             | protein_coding | 219022 | -        |
| ENSMUSG00000006289 | 24.63 | 0.206 | -2.282 | 2.99576E-05 | 0.000245803 | Osgep         | O-sialoglycoprotein endopeptidase                                             | protein_coding | 66246  | -        |

|                    |        |       |        |             |             |                   |                                                           |                |        |      |
|--------------------|--------|-------|--------|-------------|-------------|-------------------|-----------------------------------------------------------|----------------|--------|------|
| ENSMUSG00000006315 | 19.39  | 0.234 | -2.098 | 2.17061E-05 | 0.000189799 | Tmem147           | transmembrane protein 147                                 | protein_coding | 69804  | -    |
| ENSMUSG00000006356 | 33.11  | 4.081 | 2.029  | 0.002540961 | 0.0089879   | Crip2             | cysteine rich protein 2                                   | protein_coding | 68337  | -    |
| ENSMUSG00000006360 | 144.31 | 0.135 | -2.89  | 1.74686E-16 | 6.15476E-14 | Crip1             | cysteine-rich protein 1 (intestinal)                      | protein_coding | 12925  | -    |
| ENSMUSG00000006386 | 19.84  | 7.049 | 2.818  | 1.48666E-06 | 2.10179E-05 | Tek               | TEK receptor tyrosine kinase                              | protein_coding | 21687  | -    |
| ENSMUSG00000006389 | 136.87 | 4.665 | 2.222  | 2.12924E-08 | 6.3345E-07  | Mpl               | myeloproliferative leukemia virus oncogene                | protein_coding | 17480  | -    |
| ENSMUSG00000006442 | 18.08  | 0.217 | -2.203 | 0.000157673 | 0.000941894 | Srm               | spermidine synthase                                       | protein_coding | 20810  | -    |
| ENSMUSG00000006462 | 9.73   | 4.51  | 2.173  | 0.007912258 | 0.022467662 | A530013C23<br>Rik | RIKEN cDNA A530013C23 gene                                | lincRNA        | 329562 | -    |
| ENSMUSG00000006498 | 98.43  | 0.231 | -2.112 | 2.77812E-09 | 1.22654E-07 | Ptpb1             | polypyrimidine tract binding protein 1                    | protein_coding | 19205  | -    |
| ENSMUSG00000006567 | 21.08  | 5.072 | 2.343  | 2.91924E-06 | 3.66823E-05 | Atp7b             | ATPase, Cu <sup>++</sup> transporting, beta polypeptide   | protein_coding | 11979  | -    |
| ENSMUSG00000006728 | 49.44  | 0.138 | -2.86  | 1.84528E-11 | 1.72697E-09 | Cdk4              | cyclin-dependent kinase 4                                 | protein_coding | 12567  | -    |
| ENSMUSG00000006931 | 7.21   | 8.842 | 3.144  | 5.7026E-05  | 0.000414188 | P3h4              | prolyl 3-hydroxylase family member 4 (non-enzymatic)      | protein_coding | 66180  | -    |
| ENSMUSG00000007029 | 96.34  | 0.144 | -2.8   | 3.92158E-11 | 3.24455E-09 | Vars              | valyl-tRNA synthetase                                     | protein_coding | 22321  | -    |
| ENSMUSG00000007338 | 14.01  | 0.19  | -2.397 | 3.23441E-05 | 0.000262034 | Mrpl49            | mitochondrial ribosomal protein L49                       | protein_coding | 18120  | -    |
| ENSMUSG00000007603 | 33.02  | 0.142 | -2.817 | 9.7804E-10  | 5.02126E-08 | Dus31             | dihydrouridine synthase 3-like (S. cerevisiae)            | protein_coding | 224907 | -    |
| ENSMUSG00000007653 | 18.32  | 4.754 | 2.249  | 3.11223E-05 | 0.000253246 | Gabrb2            | gamma-aminobutyric acid (GABA) A receptor, subunit beta 2 | protein_coding | 14401  | -    |
| ENSMUSG00000007739 | 93.02  | 0.211 | -2.248 | 3.25781E-07 | 6.01022E-06 | Cct4              | chaperonin containing Tcp1, subunit 4 (delta)             | protein_coding | 12464  | -    |
| ENSMUSG00000007805 | 9.13   | 6.762 | 2.758  | 0.000545761 | 0.002573631 | Twist2            | twist basic helix-loop-helix transcription factor 2       | protein_coding | 13345  | bHLH |
| ENSMUSG00000007872 | 29.42  | 0.05  | -4.325 | 8.02323E-14 | 1.63829E-11 | Id3               | inhibitor of DNA binding 3                                | protein_coding | 15903  | bHLH |
| ENSMUSG00000007950 | 49.49  | 0.167 | -2.581 | 2.72658E-11 | 2.37835E-09 | Abhd8             | abhydrolase domain containing 8                           | protein_coding | 64296  | -    |
| ENSMUSG00000007989 | 11.19  | 4.615 | 2.206  | 6.65977E-05 | 0.000469108 | Fzd3              | frizzled class receptor 3                                 | protein_coding | 14365  | -    |
| ENSMUSG00000008167 | 4.5    | 0.014 | -6.145 | 1.19717E-05 | 0.000115968 | Fbxw9             | F-box and WD-40 domain protein 9                          | protein_coding | 68628  | -    |
| ENSMUSG00000008193 | 99.38  | 0.019 | -5.717 | 1.26818E-28 | 2.07289E-25 | Spib              | Spi-B transcription factor (Spi-1/PU.1 related)           | protein_coding | 272382 | ETS  |
| ENSMUSG00000008333 | 30.17  | 0.237 | -2.077 | 7.54392E-05 | 0.000518977 | Snrpb2            | U2 small nuclear ribonucleoprotein B                      | protein_coding | 20639  | -    |
| ENSMUSG00000008373 | 15.98  | 0.218 | -2.196 | 0.000325785 | 0.001692405 | Prpf31            | pre-mRNA processing factor 31                             | protein_coding | 68988  | -    |

|                    |         |       |        |             |             |           |                                                                       |                |        |         |
|--------------------|---------|-------|--------|-------------|-------------|-----------|-----------------------------------------------------------------------|----------------|--------|---------|
| ENSMUSG00000008575 | 46.76   | 4.983 | 2.317  | 2.53471E-06 | 3.2533E-05  | Nfib      | nuclear factor I/B                                                    | protein_coding | 18028  | CTF/NFI |
| ENSMUSG00000008668 | 957.99  | 0.12  | -3.059 | 3.60146E-12 | 4.14838E-10 | Rps18     | ribosomal protein S18                                                 | protein_coding | 20084  | -       |
| ENSMUSG00000009070 | 60      | 5.259 | 2.395  | 1.82976E-10 | 1.17425E-08 | Rsph14    | radial spoke head homolog 14 (Chlamydomonas)                          | protein_coding | 71236  | -       |
| ENSMUSG00000009097 | 5.97    | 5.206 | 2.38   | 0.019549824 | 0.046210312 | Tbx1      | T-box 1                                                               | protein_coding | 21380  | T-box   |
| ENSMUSG00000009216 | 4.97    | 6.09  | 2.607  | 0.011458999 | 0.030209324 | Fam163b   | family with sequence similarity 163, member B                         | protein_coding | 109349 | -       |
| ENSMUSG00000009291 | 2072.27 | 5.204 | 2.38   | 3.30158E-07 | 6.07227E-06 | Pttg1ip   | pituitary tumor-transforming 1 interacting protein                    | protein_coding | 108705 | -       |
| ENSMUSG00000009376 | 14.33   | 5.367 | 2.424  | 3.68057E-05 | 0.000290839 | Met       | met proto-oncogene                                                    | protein_coding | 17295  | -       |
| ENSMUSG00000009487 | 7.23    | 4.265 | 2.092  | 0.018820287 | 0.044911253 | Otog      | otogelin                                                              | protein_coding | 18419  | -       |
| ENSMUSG00000009614 | 11.57   | 7.935 | 2.988  | 1.11959E-05 | 0.000109874 | Sardh     | sarcosine dehydrogenase                                               | protein_coding | 192166 | -       |
| ENSMUSG00000009628 | 7.37    | 6.741 | 2.753  | 0.000238432 | 0.00131504  | Tex15     | testis expressed gene 15                                              | protein_coding | 104271 | -       |
| ENSMUSG00000009739 | 33.8    | 0.171 | -2.544 | 1.51775E-08 | 4.79304E-07 | Pou6f1    | POU domain, class 6, transcription factor 1                           | protein_coding | 19009  | Pou     |
| ENSMUSG00000009927 | 558.61  | 0.239 | -2.064 | 2.77546E-09 | 1.22654E-07 | Rps25     | ribosomal protein S25                                                 | protein_coding | 75617  | -       |
| ENSMUSG00000010064 | 5.98    | 7.061 | 2.82   | 0.000317885 | 0.001656152 | Slc38a3   | solute carrier family 38, member 3                                    | protein_coding | 76257  | -       |
| ENSMUSG00000010080 | 4.75    | 6.101 | 2.609  | 0.004673011 | 0.014682521 | Epn3      | epsin 3                                                               | protein_coding | 71889  | -       |
| ENSMUSG00000010142 | 66.9    | 0.101 | -3.303 | 1.21655E-12 | 1.68456E-10 | Tnfrsf13b | tumor necrosis factor receptor superfamily, member 13b                | protein_coding | 57916  | -       |
| ENSMUSG00000010406 | 30.4    | 0.244 | -2.034 | 0.000170814 | 0.001003848 | Mrpl52    | mitochondrial ribosomal protein L52                                   | protein_coding | 68836  | -       |
| ENSMUSG00000010461 | 25.28   | 4.121 | 2.043  | 1.13349E-06 | 1.6736E-05  | Eya4      | EYA transcriptional coactivator and phosphatase 4                     | protein_coding | 14051  | -       |
| ENSMUSG00000010476 | 25.05   | 6.81  | 2.768  | 4.659E-08   | 1.1864E-06  | Ebf3      | early B cell factor 3                                                 | protein_coding | 13593  | COE     |
| ENSMUSG00000010607 | 8.63    | 0.123 | -3.025 | 8.50752E-05 | 0.000571937 | Pigyl     | phosphatidylinositol glycan anchor biosynthesis, class Y-like         | protein_coding | 66268  | -       |
| ENSMUSG00000010797 | 4.43    | 5.654 | 2.499  | 0.005562082 | 0.016953573 | Wnt2      | wingless-type MMTV integration site family, member 2                  | protein_coding | 22413  | -       |
| ENSMUSG00000010803 | 5.85    | 5.415 | 2.437  | 0.000398867 | 0.001995332 | Gabra1    | gamma-aminobutyric acid (GABA) A receptor, subunit alpha 1            | protein_coding | 14394  | -       |
| ENSMUSG00000010825 | 13.67   | 4.374 | 2.129  | 9.07282E-05 | 0.000602426 | Grid2ip   | glutamate receptor, ionotropic, delta 2 (Grid2) interacting protein 1 | protein_coding | 170935 | -       |
| ENSMUSG00000011589 | 4.93    | 6.288 | 2.653  | 0.011244744 | 0.029793541 | Fsd1      | fibronectin type 3 and SPRY domain-containing protein                 | protein_coding | 240121 | -       |
| ENSMUSG00000012017 | 11.51   | 4.872 | 2.284  | 0.000162485 | 0.000965507 | Scarf2    | scavenger receptor class F, member 2                                  | protein_coding | 224024 | -       |



|                    |        |        |        |             |             |         |                                                                    |                |        |         |
|--------------------|--------|--------|--------|-------------|-------------|---------|--------------------------------------------------------------------|----------------|--------|---------|
| ENSMUSG00000012483 | 12.54  | 0.173  | -2.529 | 0.000101096 | 0.000659379 | Rpa3    | replication protein A3                                             | protein_coding | 68240  | -       |
| ENSMUSG00000013419 | 5.61   | 10.651 | 3.413  | 0.000493106 | 0.002368127 | Zfp651  | zinc finger protein 651                                            | protein_coding | 270210 | ZBTB    |
| ENSMUSG00000013584 | 12.37  | 6.351  | 2.667  | 4.00105E-06 | 4.7576E-05  | Aldh1a2 | aldehyde dehydrogenase family 1, subfamily A2                      | protein_coding | 19378  | -       |
| ENSMUSG00000013611 | 7.14   | 4.185  | 2.065  | 0.003408189 | 0.011387459 | Snx31   | sorting nexin 31                                                   | protein_coding | 66696  | -       |
| ENSMUSG00000014030 | 122.27 | 0.211  | -2.248 | 3.45451E-10 | 1.99595E-08 | Pax5    | paired box 5                                                       | protein_coding | 18507  | PAX     |
| ENSMUSG00000014158 | 15.8   | 5.578  | 2.48   | 1.51754E-05 | 0.000141435 | Trpv4   | transient receptor potential cation channel, subfamily V, member 4 | protein_coding | 63873  | -       |
| ENSMUSG00000014329 | 25.75  | 5.156  | 2.366  | 0.000400062 | 0.001999084 | Bicc1   | BicC family RNA binding protein 1                                  | protein_coding | 83675  | -       |
| ENSMUSG00000014355 | 28.36  | 0.234  | -2.098 | 0.000109797 | 0.000703868 | Anapc1  | anaphase promoting complex subunit 1                               | protein_coding | 17222  | -       |
| ENSMUSG00000014361 | 11.22  | 5.55   | 2.472  | 0.000357102 | 0.00181984  | Mertk   | c-mer proto-oncogene tyrosine kinase                               | protein_coding | 17289  | -       |
| ENSMUSG00000014453 | 96.52  | 0.081  | -3.63  | 1.41895E-21 | 9.10614E-19 | Blk     | B lymphoid kinase                                                  | protein_coding | 12143  | -       |
| ENSMUSG00000014554 | 32.31  | 0.231  | -2.117 | 3.67802E-07 | 6.64224E-06 | Dguok   | deoxyguanosine kinase                                              | protein_coding | 27369  | -       |
| ENSMUSG00000014767 | 30.05  | 0.247  | -2.017 | 0.000321586 | 0.001672043 | Tbp     | TATA box binding protein                                           | protein_coding | 21374  | -       |
| ENSMUSG00000014771 | 14.29  | 0.143  | -2.809 | 1.6708E-05  | 0.000153176 | Pcd2    | programmed cell death 2                                            | protein_coding | 18567  | -       |
| ENSMUSG00000014873 | 15.03  | 0.172  | -2.539 | 0.000107154 | 0.000691118 | Surf2   | surfeit gene 2                                                     | protein_coding | 20931  | -       |
| ENSMUSG00000015134 | 3.94   | 5.433  | 2.442  | 0.002521615 | 0.008935299 | Aldh1a3 | aldehyde dehydrogenase family 1, subfamily A3                      | protein_coding | 56847  | -       |
| ENSMUSG00000015305 | 25.27  | 4.901  | 2.293  | 7.65575E-07 | 1.21097E-05 | Sash1   | SAM and SH3 domain containing 1                                    | protein_coding | 70097  | -       |
| ENSMUSG00000015314 | 76.9   | 0.218  | -2.199 | 5.75806E-08 | 1.4193E-06  | Slamf6  | SLAM family member 6                                               | protein_coding | 30925  | -       |
| ENSMUSG00000015316 | 347.47 | 5.326  | 2.413  | 6.57757E-09 | 2.45212E-07 | Slamf1  | signaling lymphocytic activation molecule family member 1          | protein_coding | 27218  | -       |
| ENSMUSG00000015337 | 8.32   | 0.201  | -2.313 | 0.001503913 | 0.005885162 | Endog   | endonuclease G                                                     | protein_coding | 13804  | -       |
| ENSMUSG00000015355 | 85.38  | 0.23   | -2.118 | 1.00885E-10 | 7.19364E-09 | Cd48    | CD48 antigen                                                       | protein_coding | 12506  | -       |
| ENSMUSG00000015396 | 35.44  | 0.151  | -2.73  | 5.93253E-08 | 1.45432E-06 | Cd83    | CD83 antigen                                                       | protein_coding | 12522  | -       |
| ENSMUSG00000015461 | 43.15  | 0.227  | -2.137 | 2.37048E-07 | 4.61609E-06 | Atf6b   | activating transcription factor 6 beta                             | protein_coding | 12915  | TF_bZIP |
| ENSMUSG00000015484 | 11.65  | 10.974 | 3.456  | 1.2309E-06  | 1.7953E-05  | Fam163a | family with sequence similarity 163, member A                      | protein_coding | 329274 | -       |
| ENSMUSG00000015597 | 56.04  | 0.21   | -2.251 | 3.60631E-08 | 9.67191E-07 | Zfp318  | zinc finger protein 318                                            | protein_coding | 57908  | -       |

|                        |        |       |        |             |             |         |                                                                  |                |        |          |
|------------------------|--------|-------|--------|-------------|-------------|---------|------------------------------------------------------------------|----------------|--------|----------|
| ENSMUSG00000<br>015806 | 15.39  | 0.237 | -2.075 | 0.000457671 | 0.002237183 | Qdpr    | quinoid dihydropteridine reductase                               | protein_coding | 110391 | -        |
| ENSMUSG00000<br>015843 | 5.12   | 4.698 | 2.232  | 0.019478094 | 0.046105584 | Rxrg    | retinoid X receptor gamma                                        | protein_coding | 20183  | RXR-like |
| ENSMUSG00000<br>015879 | 17.67  | 5.121 | 2.357  | 3.7902E-05  | 0.000297536 | Fam184b | family with sequence similarity 184, member B                    | protein_coding | 58227  | -        |
| ENSMUSG00000<br>015957 | 6.68   | 4.786 | 2.259  | 0.001088178 | 0.004521032 | Wnt11   | wingless-type MMTV integration site family, member 11            | protein_coding | 22411  | -        |
| ENSMUSG00000<br>016128 | 20.75  | 6.022 | 2.59   | 3.33273E-06 | 4.07942E-05 | Stard13 | StAR-related lipid transfer (START) domain containing 13         | protein_coding | 243362 | -        |
| ENSMUSG00000<br>016206 | 31.06  | 0.105 | -3.255 | 2.8296E-10  | 1.67511E-08 | H2-M3   | histocompatibility 2, M region locus 3                           | protein_coding | 14991  | -        |
| ENSMUSG00000<br>016255 | 577.14 | 5.251 | 2.393  | 7.74158E-08 | 1.80895E-06 | Tubb1   | tubulin, beta 1 class VI                                         | protein_coding | 545486 | -        |
| ENSMUSG00000<br>016346 | 10.67  | 8.085 | 3.015  | 8.82146E-06 | 9.03722E-05 | Kcnq2   | potassium voltage-gated channel, subfamily Q, member 2           | protein_coding | 16536  | -        |
| ENSMUSG00000<br>016382 | 8.45   | 4.078 | 2.028  | 0.006960242 | 0.020283585 | Pls3    | plastin 3 (T-isoform)                                            | protein_coding | 102866 | -        |
| ENSMUSG00000<br>016554 | 73.67  | 0.186 | -2.43  | 5.5795E-11  | 4.41666E-09 | Eif3d   | eukaryotic translation initiation factor 3, subunit D            | protein_coding | 55944  | -        |
| ENSMUSG00000<br>016763 | 22.34  | 7.049 | 2.817  | 1.339E-06   | 1.92176E-05 | Scube1  | signal peptide, CUB domain, EGF-like 1                           | protein_coding | 64706  | -        |
| ENSMUSG00000<br>016918 | 19.17  | 4.116 | 2.041  | 0.000383535 | 0.001931542 | Sulf1   | sulfatase 1                                                      | protein_coding | 240725 | -        |
| ENSMUSG00000<br>016921 | 114.79 | 0.246 | -2.023 | 3.71438E-10 | 2.11651E-08 | Srsf6   | serine/arginine-rich splicing factor 6                           | protein_coding | 67996  | -        |
| ENSMUSG00000<br>016984 | 10.83  | 0.092 | -3.44  | 9.46791E-06 | 9.53103E-05 | Etaa1   | Ewing tumor-associated antigen 1                                 | protein_coding | 68145  | -        |
| ENSMUSG00000<br>016995 | 6.47   | 4.484 | 2.165  | 0.000737366 | 0.003285328 | Matn4   | matrilin 4                                                       | protein_coding | 17183  | -        |
| ENSMUSG00000<br>017009 | 22.91  | 0.171 | -2.55  | 2.1579E-05  | 0.000188854 | Sdc4    | syndecan 4                                                       | protein_coding | 20971  | -        |
| ENSMUSG00000<br>017221 | 39.76  | 0.225 | -2.15  | 1.25097E-07 | 2.68219E-06 | Psm3    | proteasome (prosome, macropain) 26S subunit, non-ATPase, 3       | protein_coding | 22123  | -        |
| ENSMUSG00000<br>017314 | 27.3   | 4.677 | 2.225  | 3.28458E-05 | 0.000265619 | Mpp2    | membrane protein, palmitoylated 2 (MAGUK p55 subfamily member 2) | protein_coding | 50997  | -        |
| ENSMUSG00000<br>017615 | 13.44  | 0.222 | -2.173 | 0.000483277 | 0.002333158 | Tnfaip1 | tumor necrosis factor, alpha-induced protein 1 (endothelial)     | protein_coding | 21927  | -        |
| ENSMUSG00000<br>017652 | 34.83  | 0.048 | -4.384 | 5.61618E-15 | 1.48408E-12 | Cd40    | CD40 antigen                                                     | protein_coding | 21939  | -        |
| ENSMUSG00000<br>017688 | 11.2   | 5.302 | 2.407  | 1.91991E-05 | 0.000171807 | Hnf4g   | hepatocyte nuclear factor 4, gamma                               | protein_coding | 30942  | RXR-like |
| ENSMUSG00000<br>017716 | 15.43  | 4.225 | 2.079  | 0.000295994 | 0.00156387  | Birc5   | baculoviral IAP repeat-containing 5                              | protein_coding | 11799  | -        |
| ENSMUSG00000<br>017724 | 5.23   | 5.843 | 2.547  | 0.01341506  | 0.03414017  | Etv4    | ets variant 4                                                    | protein_coding | 18612  | ETS      |
| ENSMUSG00000<br>017740 | 10.95  | 4.094 | 2.034  | 0.001325611 | 0.005309833 | Slc12a5 | solute carrier family 12, member 5                               | protein_coding | 57138  | -        |

|                        |         |        |        |             |             |          |                                                                                         |                |        |          |
|------------------------|---------|--------|--------|-------------|-------------|----------|-----------------------------------------------------------------------------------------|----------------|--------|----------|
| ENSMUSG00000<br>017801 | 28.35   | 0.194  | -2.365 | 6.37565E-06 | 6.92649E-05 | Mlx      | MAX-like protein X                                                                      | protein_coding | 21428  | bHLH     |
| ENSMUSG00000<br>017817 | 11.29   | 7.159  | 2.84   | 0.000524341 | 0.00249256  | Jph2     | junctophilin 2                                                                          | protein_coding | 59091  | -        |
| ENSMUSG00000<br>017978 | 231.79  | 24.114 | 4.592  | 6.4624E-07  | 1.06117E-05 | Cadps2   | Ca2+-dependent activator protein for secretion 2                                        | protein_coding | 320405 | -        |
| ENSMUSG00000<br>018126 | 7.52    | 7.219  | 2.852  | 0.012556876 | 0.032460726 | Baiap2l2 | BAI1-associated protein 2-like 2                                                        | protein_coding | 207495 | -        |
| ENSMUSG00000<br>018168 | 104.49  | 0.184  | -2.444 | 4.97918E-09 | 1.96639E-07 | Ikzf3    | IKAROS family zinc finger 3                                                             | protein_coding | 22780  | zf-C2H2  |
| ENSMUSG00000<br>018169 | 80.39   | 0.139  | -2.848 | 1.26317E-13 | 2.38925E-11 | Mfng     | MFNG O-fucosylpeptide 3-beta-N-acetylglucosaminyltransferase                            | protein_coding | 17305  | -        |
| ENSMUSG00000<br>018199 | 69.27   | 4.944  | 2.306  | 1.54406E-08 | 4.85907E-07 | Trove2   | TROVE domain family, member 2                                                           | protein_coding | 20822  | -        |
| ENSMUSG00000<br>018417 | 19.67   | 4.125  | 2.044  | 2.23146E-05 | 0.000193612 | Myo1b    | myosin IB                                                                               | protein_coding | 17912  | -        |
| ENSMUSG00000<br>018446 | 25.44   | 0.147  | -2.769 | 2.34446E-06 | 3.05494E-05 | C1qbp    | complement component 1, q subcomponent binding protein                                  | protein_coding | 12261  | -        |
| ENSMUSG00000<br>018459 | 16.45   | 5.081  | 2.345  | 9.42448E-05 | 0.00062169  | Slc13a3  | solute carrier family 13 (sodium-dependent dicarboxylate transporter), member 3         | protein_coding | 114644 | -        |
| ENSMUSG00000<br>018474 | 157.55  | 0.171  | -2.547 | 3.54401E-12 | 4.10853E-10 | Chd3     | chromodomain helicase DNA binding protein 3                                             | protein_coding | 216848 | -        |
| ENSMUSG00000<br>018593 | 5.31    | 4.264  | 2.092  | 0.012386895 | 0.032122978 | Sparc    | secreted acidic cysteine rich glycoprotein                                              | protein_coding | 20692  | -        |
| ENSMUSG00000<br>018648 | 15.14   | 5.327  | 2.413  | 0.000224991 | 0.00125555  | Dusp14   | dual specificity phosphatase 14                                                         | protein_coding | 56405  | -        |
| ENSMUSG00000<br>018698 | 9.68    | 9.795  | 3.292  | 7.84925E-07 | 1.23722E-05 | Lhx1     | LIM homeobox protein 1                                                                  | protein_coding | 16869  | Homeobox |
| ENSMUSG00000<br>018750 | 42.63   | 0.159  | -2.655 | 4.27761E-09 | 1.73509E-07 | Zbtb4    | zinc finger and BTB domain containing 4                                                 | protein_coding | 75580  | ZBTB     |
| ENSMUSG00000<br>018821 | 3.34    | 0.019  | -5.713 | 0.000176169 | 0.001028121 | Avpi1    | arginine vasopressin-induced 1                                                          | protein_coding | 69534  | -        |
| ENSMUSG00000<br>018848 | 16.61   | 0.143  | -2.809 | 9.04389E-06 | 9.20213E-05 | Rars     | arginyl-tRNA synthetase                                                                 | protein_coding | 104458 | -        |
| ENSMUSG00000<br>018858 | 23.17   | 0.21   | -2.25  | 1.25729E-06 | 1.82637E-05 | Mrpl58   | mitochondrial ribosomal protein L58                                                     | protein_coding | 68572  | -        |
| ENSMUSG00000<br>018882 | 10.36   | 0.209  | -2.26  | 0.001702836 | 0.006504731 | Mrpl45   | mitochondrial ribosomal protein L45                                                     | protein_coding | 67036  | -        |
| ENSMUSG00000<br>018965 | 1265.66 | 4.347  | 2.12   | 2.33878E-06 | 3.04975E-05 | Ywhah    | tyrosine 3-monooxygenase/tryptophan 5-monooxygenase activation protein, eta polypeptide | protein_coding | 22629  | -        |
| ENSMUSG00000<br>019027 | 8.8     | 4.906  | 2.295  | 0.003049322 | 0.010411032 | Dnah1    | dynein, axonemal, heavy chain 1                                                         | protein_coding | 110084 | -        |
| ENSMUSG00000<br>019039 | 33.53   | 0.211  | -2.243 | 5.14546E-07 | 8.814E-06   | Dalrd3   | DALR anticodon binding domain containing 3                                              | protein_coding | 67789  | -        |
| ENSMUSG00000<br>019055 | 22.46   | 4.046  | 2.017  | 0.000860245 | 0.003731281 | Plod1    | procollagen-lysine, 2-oxoglutarate 5-dioxygenase 1                                      | protein_coding | 18822  | -        |

|                    |        |       |        |             |             |         |                                                                                 |                |        |          |
|--------------------|--------|-------|--------|-------------|-------------|---------|---------------------------------------------------------------------------------|----------------|--------|----------|
| ENSMUSG00000019080 | 3.31   | 0.172 | -2.541 | 0.013688244 | 0.034681902 | Mfsd3   | major facilitator superfamily domain containing 3                               | protein_coding | 69572  | -        |
| ENSMUSG00000019122 | 62.03  | 0.22  | -2.183 | 4.06351E-06 | 4.81317E-05 | Ccl9    | chemokine (C-C motif) ligand 9                                                  | protein_coding | 20308  | -        |
| ENSMUSG00000019295 | 12.66  | 0.146 | -2.774 | 1.69429E-05 | 0.000155014 | Tmem129 | transmembrane protein 129                                                       | protein_coding | 68366  | -        |
| ENSMUSG00000019297 | 13.8   | 0.22  | -2.186 | 0.000191833 | 0.001103763 | Nop9    | NOP9 nucleolar protein                                                          | protein_coding | 67842  | -        |
| ENSMUSG00000019432 | 223.79 | 0.241 | -2.051 | 8.33311E-10 | 4.34075E-08 | Ddx39b  | DEAD (Asp-Glu-Ala-Asp) box polypeptide 39B                                      | protein_coding | 53817  | -        |
| ENSMUSG00000019518 | 14.59  | 0.18  | -2.474 | 7.07278E-05 | 0.000493173 | Ap4m1   | adaptor-related protein complex AP-4, mu 1                                      | protein_coding | 11781  | -        |
| ENSMUSG00000019579 | 25.87  | 0.096 | -3.377 | 9.18267E-11 | 6.73483E-09 | Mydgf   | myeloid derived growth factor                                                   | protein_coding | 28106  | -        |
| ENSMUSG00000019647 | 16.36  | 4.634 | 2.212  | 2.01005E-05 | 0.000178805 | Sema6a  | sema domain, transmembrane domI(TM), and cytoplasmic d28aladin28izamaphorin) 6A | protein_coding | 20358  | -        |
| ENSMUSG00000019710 | 59.26  | 0.224 | -2.16  | 1.11487E-08 | 3.74451E-07 | Mrpl24  | mitochondrial ribosomal protein L24                                             | protein_coding | 67707  | -        |
| ENSMUSG00000019803 | 8.88   | 4.49  | 2.167  | 0.000347585 | 0.001781673 | Nr2e1   | nuclear receptor subfamily 2, group E, member 1                                 | protein_coding | 21907  | RXR-like |
| ENSMUSG00000019817 | 10.93  | 4.641 | 2.215  | 0.001214562 | 0.004945493 | Plagl1  | pleiomorphic adenoma gene-like 1                                                | protein_coding | 22634  | zf-C2H2  |
| ENSMUSG00000019852 | 25.97  | 4.808 | 2.265  | 5.39025E-07 | 9.13749E-06 | Arfgef3 | ARFGEF family member 3                                                          | protein_coding | 215821 | -        |
| ENSMUSG00000019913 | 9.29   | 5.57  | 2.478  | 0.001190328 | 0.004860032 | Sim1    | single-minded family bHLH transcription factor 1                                | protein_coding | 20464  | bHLH     |
| ENSMUSG00000019917 | 10.25  | 4.535 | 2.181  | 0.002123028 | 0.007791809 | Sept10  | septin 10                                                                       | protein_coding | 103080 | -        |
| ENSMUSG00000019927 | 26.12  | 0.247 | -2.018 | 0.000157907 | 0.000942952 | Ube2d1  | ubiquitin-conjugating enzyme E2D 1                                              | protein_coding | 216080 | -        |
| ENSMUSG00000019929 | 5.28   | 4.614 | 2.206  | 0.010517053 | 0.028273628 | Dcn     | decorin                                                                         | protein_coding | 13179  | -        |
| ENSMUSG00000020000 | 6.31   | 5.012 | 2.325  | 0.007253957 | 0.020952637 | Moxd1   | monooxygenase, DBH-like 1                                                       | protein_coding | 59012  | -        |
| ENSMUSG00000020018 | 30.63  | 0.2   | -2.323 | 2.9276E-06  | 3.67617E-05 | Snrpf   | small nuclear ribonucleoprotein polypeptide F                                   | protein_coding | 69878  | -        |
| ENSMUSG00000020032 | 11.32  | 5.506 | 2.461  | 0.000869829 | 0.003758105 | Nuak1   | NUAK family, SNF1-like kinase, 1                                                | protein_coding | 77976  | -        |
| ENSMUSG00000020048 | 117.62 | 0.249 | -2.008 | 9.27346E-09 | 3.24192E-07 | Hsp90b1 | heat shock protein 90, beta (Grp94), member 1                                   | protein_coding | 22027  | -        |
| ENSMUSG00000020067 | 10.7   | 5.933 | 2.569  | 0.000866391 | 0.003747755 | Mypn    | myopalladin                                                                     | protein_coding | 68802  | -        |
| ENSMUSG00000020069 | 30.59  | 0.196 | -2.348 | 1.49459E-07 | 3.13011E-06 | Hnrmp3  | heterogeneous nuclear ribonucleoprotein H3                                      | protein_coding | 432467 | -        |
| ENSMUSG00000020075 | 55.13  | 0.202 | -2.309 | 5.81949E-08 | 1.43072E-06 | Ddx21   | DEAD (Asp-Glu-Ala-Asp) box polypeptide 21                                       | protein_coding | 56200  | -        |
| ENSMUSG00000020090 | 6.01   | 4.775 | 2.255  | 0.014707768 | 0.036726498 | Npffr1  | neuropeptide FF receptor 1                                                      | protein_coding | 237362 | -        |

|                    |         |       |        |             |             |          |                                                                              |                |        |      |
|--------------------|---------|-------|--------|-------------|-------------|----------|------------------------------------------------------------------------------|----------------|--------|------|
| ENSMUSG00000020099 | 18.93   | 5.199 | 2.378  | 8.46011E-06 | 8.75186E-05 | Unc5b    | unc-5 netrin receptor B                                                      | protein_coding | 107449 | -    |
| ENSMUSG00000020120 | 1291.05 | 4.388 | 2.133  | 4.19026E-08 | 1.09281E-06 | Plek     | pleckstrin                                                                   | protein_coding | 56193  | -    |
| ENSMUSG00000020135 | 10.2    | 4.269 | 2.094  | 0.002487358 | 0.008834817 | Apc2     | adenomatosis polyposis coli 2                                                | protein_coding | 23805  | -    |
| ENSMUSG00000020142 | 8.07    | 6.116 | 2.613  | 0.004532129 | 0.014321248 | Slc1a4   | solute carrier family 1 (glutamate/neutral amino acid transporter), member 4 | protein_coding | 55963  | -    |
| ENSMUSG00000020156 | 43.77   | 0.213 | -2.234 | 7.03161E-09 | 2.58916E-07 | Mum1     | melanoma associated antigen (mutated) 1                                      | protein_coding | 68114  | -    |
| ENSMUSG00000020167 | 111.57  | 0.243 | -2.044 | 1.7594E-08  | 5.42276E-07 | Tcf3     | transcription factor 3                                                       | protein_coding | 21423  | bHLH |
| ENSMUSG00000020169 | 6.79    | 4.531 | 2.18   | 0.004009746 | 0.013002563 | Best3    | bestrophin 3                                                                 | protein_coding | 382427 | -    |
| ENSMUSG00000020171 | 37.87   | 0.24  | -2.062 | 9.36151E-07 | 1.43634E-05 | Yeats4   | YEATS domain containing 4                                                    | protein_coding | 64050  | -    |
| ENSMUSG00000020181 | 55.57   | 4.351 | 2.121  | 8.71961E-08 | 1.98836E-06 | Nav3     | neuron navigator 3                                                           | protein_coding | 260315 | -    |
| ENSMUSG00000020185 | 8.88    | 4.457 | 2.156  | 0.008171932 | 0.023041182 | E2f7     | E2F transcription factor 7                                                   | protein_coding | 52679  | E2F  |
| ENSMUSG00000020205 | 12.14   | 4.185 | 2.065  | 0.001571658 | 0.00610487  | Phlda1   | pleckstrin homology like domain, family A, member 1                          | protein_coding | 21664  | -    |
| ENSMUSG00000020219 | 39.52   | 0.167 | -2.581 | 1.88811E-09 | 9.0473E-08  | Timm13   | translocase of inner mitochondrial membrane 13                               | protein_coding | 30055  | -    |
| ENSMUSG00000020231 | 20.29   | 4.661 | 2.221  | 0.000155402 | 0.000931738 | Dip2a    | disco interacting protein 2 homolog A                                        | protein_coding | 64451  | -    |
| ENSMUSG00000020268 | 6.25    | 0.134 | -2.903 | 0.001433409 | 0.005663351 | Lym7     | LYR motif containing 7                                                       | protein_coding | 75530  | -    |
| ENSMUSG00000020312 | 5.81    | 5.081 | 2.345  | 0.001624872 | 0.006266864 | Shc2     | SHC (Src homology 2 domain containing) transforming protein 2                | protein_coding | 216148 | -    |
| ENSMUSG00000020331 | 8.37    | 5.892 | 2.559  | 0.000472497 | 0.002290341 | Hcn2     | hyperpolarization-activated, cyclic nucleotide-gated K+ 2                    | protein_coding | 15166  | -    |
| ENSMUSG00000020358 | 123.49  | 0.247 | -2.018 | 9.31888E-10 | 4.81181E-08 | Hnmpab   | heterogeneous nuclear ribonucleoprotein A/B                                  | protein_coding | 15384  | -    |
| ENSMUSG00000020363 | 6.5     | 5.304 | 2.407  | 0.020235722 | 0.047500416 | Gfpt2    | glutamine fructose-6-phosphate transaminase 2                                | protein_coding | 14584  | -    |
| ENSMUSG00000020374 | 8.21    | 7.79  | 2.962  | 6.75245E-05 | 0.000473964 | Rasgef1c | RasGEF domain family, member 1C                                              | protein_coding | 74563  | -    |
| ENSMUSG00000020401 | 7.24    | 0.109 | -3.2   | 8.98719E-05 | 0.000599001 | Fam71b   | family with sequence similarity 71, member B                                 | protein_coding | 432552 | -    |
| ENSMUSG00000020407 | 11.24   | 4.524 | 2.178  | 0.000385404 | 0.001938424 | Upp1     | uridine phosphorylase 1                                                      | protein_coding | 22271  | -    |
| ENSMUSG00000020422 | 46.86   | 5.079 | 2.345  | 1.44959E-07 | 3.05724E-06 | Tns3     | tensin 3                                                                     | protein_coding | 319939 | -    |
| ENSMUSG00000020430 | 23.22   | 0.12  | -3.06  | 2.83223E-09 | 1.24618E-07 | Pes1     | pescadillo ribosomal biogenesis factor 1                                     | protein_coding | 64934  | -    |
| ENSMUSG00000020431 | 16.58   | 7.327 | 2.873  | 6.42938E-06 | 6.95962E-05 | Adcy1    | adenylate cyclase 1                                                          | protein_coding | 432530 | -    |

|                        |        |        |        |             |             |          |                                                                                         |                |        |          |
|------------------------|--------|--------|--------|-------------|-------------|----------|-----------------------------------------------------------------------------------------|----------------|--------|----------|
| ENSMUSG00000<br>020435 | 16.62  | 4.738  | 2.244  | 0.00023188  | 0.001287991 | Osbp2    | oxysterol binding protein 2                                                             | protein_coding | 74309  | -        |
| ENSMUSG00000<br>020436 | 6.52   | 8.857  | 3.147  | 0.000195182 | 0.001119448 | Gabrg2   | gamma-aminobutyric acid (GABA)<br>A receptor, subunit gamma 2                           | protein_coding | 14406  | -        |
| ENSMUSG00000<br>020439 | 62.78  | 5.003  | 2.323  | 1.10623E-08 | 3.72943E-07 | Smtn     | smoothelin                                                                              | protein_coding | 29856  | -        |
| ENSMUSG00000<br>020459 | 17.52  | 0.178  | -2.489 | 3.07158E-06 | 3.80905E-05 | Mtif2    | mitochondrial translational initiation<br>factor 2                                      | protein_coding | 76784  | -        |
| ENSMUSG00000<br>020460 | 737.55 | 0.248  | -2.01  | 1.78568E-07 | 3.62563E-06 | Rps27a   | ribosomal protein S27A                                                                  | protein_coding | 78294  | -        |
| ENSMUSG00000<br>020471 | 14.8   | 0.124  | -3.014 | 1.53959E-06 | 2.15627E-05 | Pold2    | polymerase (DNA directed), delta 2,<br>regulatory subunit                               | protein_coding | 18972  | -        |
| ENSMUSG00000<br>020473 | 5.9    | 10.165 | 3.346  | 0.000427231 | 0.00211293  | Aebp1    | AE binding protein 1                                                                    | protein_coding | 11568  | -        |
| ENSMUSG00000<br>020486 | 5.95   | 6.101  | 2.609  | 0.012015059 | 0.031377727 | Sept4    | septin 4                                                                                | protein_coding | 18952  | -        |
| ENSMUSG00000<br>020495 | 10.88  | 0.233  | -2.103 | 0.00088771  | 0.00382616  | Smg8     | smg-8 homolog, nonsense mediated<br>mRNA decay factor ( <i>C. elegans</i> )             | protein_coding | 74133  | -        |
| ENSMUSG00000<br>020537 | 18.84  | 0.197  | -2.341 | 4.77145E-06 | 5.47156E-05 | Drg2     | developmentally regulated GTP<br>binding protein 2                                      | protein_coding | 13495  | -        |
| ENSMUSG00000<br>020542 | 7.65   | 4.704  | 2.234  | 0.020195658 | 0.047412565 | Myocd    | myocardin                                                                               | protein_coding | 214384 | -        |
| ENSMUSG00000<br>020549 | 13.7   | 0.072  | -3.793 | 9.35862E-06 | 9.44748E-05 | Elac2    | elaC ribonuclease Z 2                                                                   | protein_coding | 68626  | -        |
| ENSMUSG00000<br>020553 | 60.12  | 5.819  | 2.541  | 1.60695E-08 | 5.01831E-07 | Pctp     | phosphatidylcholine transfer protein<br>family with sequence similarity 20,<br>member A | protein_coding | 18559  | -        |
| ENSMUSG00000<br>020614 | 8.63   | 4.169  | 2.06   | 0.008524405 | 0.023851342 | Fam20a   |                                                                                         | protein_coding | 208659 | -        |
| ENSMUSG00000<br>020627 | 40.34  | 5.843  | 2.547  | 2.91094E-11 | 2.50271E-09 | Klhl29   | kelch-like 29                                                                           | protein_coding | 208439 | -        |
| ENSMUSG00000<br>020633 | 9.57   | 4.016  | 2.006  | 0.002898267 | 0.00998138  | Dcdc2c   | doublecortin domain containing 2C                                                       | protein_coding | 68511  | -        |
| ENSMUSG00000<br>020672 | 18.96  | 4.21   | 2.074  | 0.000847513 | 0.0036874   | Sntg2    | syntrophin, gamma 2                                                                     | protein_coding | 268534 | -        |
| ENSMUSG00000<br>020674 | 11.25  | 8.24   | 3.043  | 6.465E-06   | 6.99395E-05 | Pxdn     | peroxidasin                                                                             | protein_coding | 69675  | -        |
| ENSMUSG00000<br>020679 | 7.3    | 5.955  | 2.574  | 0.000280342 | 0.001494351 | Hnf1b    | HNF1 homeobox B                                                                         | protein_coding | 21410  | Homeobox |
| ENSMUSG00000<br>020681 | 228.89 | 7.555  | 2.917  | 0.001294557 | 0.005208663 | Ace      | angiotensin I converting enzyme<br>(peptidyl-dipeptidase A) 1                           | protein_coding | 11421  | -        |
| ENSMUSG00000<br>020692 | 15.7   | 0.169  | -2.564 | 3.7532E-05  | 0.000295255 | Nle1     | notchless homolog 1                                                                     | protein_coding | 217011 | -        |
| ENSMUSG00000<br>020701 | 10.1   | 6.415  | 2.682  | 0.000256169 | 0.001392767 | Tmem132e | transmembrane protein 132E                                                              | protein_coding | 270893 | -        |
| ENSMUSG00000<br>020702 | 12.03  | 7.303  | 2.869  | 0.000282555 | 0.001504363 | Ccl1     | chemokine (C-C motif) ligand 1                                                          | protein_coding | 20290  | -        |
| ENSMUSG00000<br>020706 | 19.77  | 0.137  | -2.87  | 2.99321E-05 | 0.000245803 | Ftsj3    | FtsJ RNA methyltransferase<br>homolog 3 ( <i>E. coli</i> )                              | protein_coding | 56095  | -        |

|                        |        |        |        |             |             |               |                                                           |                |        |   |
|------------------------|--------|--------|--------|-------------|-------------|---------------|-----------------------------------------------------------|----------------|--------|---|
| ENSMUSG00000<br>020736 | 52.24  | 0.135  | -2.892 | 1.72847E-10 | 1.12941E-07 | N'5c          | 5',3'-nucleotidase, cytosolic                             | protein_coding | 50773  | - |
| ENSMUSG00000<br>020743 | 50.31  | 0.147  | -2.764 | 1.28671E-10 | 8.79125E-09 | Mif4gd        | MIF4G domain containing                                   | protein_coding | 69674  | - |
| ENSMUSG00000<br>020787 | 250.14 | 4.235  | 2.082  | 4.07186E-08 | 1.07126E-06 | P2rx1         | purinergic receptor P2X, ligand-gated ion channel, 1      | protein_coding | 18436  | - |
| ENSMUSG00000<br>020826 | 6.67   | 17.866 | 4.159  | 4.82126E-05 | 0.000363242 | Nos2          | nitric oxide synthase 2, inducible                        | protein_coding | 18126  | - |
| ENSMUSG00000<br>020848 | 6.49   | 7.588  | 2.924  | 0.001684722 | 0.00645475  | Doc2b         | double C2, beta                                           | protein_coding | 13447  | - |
| ENSMUSG00000<br>020857 | 142.16 | 0.153  | -2.704 | 2.03505E-12 | 2.55719E-10 | Nme2          | NME/NM23 nucleoside diphosphate kinase 2                  | protein_coding | 18103  | - |
| ENSMUSG00000<br>020869 | 25.46  | 0.237  | -2.078 | 1.54863E-05 | 0.000143885 | Lrrc59        | leucine rich repeat containing 59                         | protein_coding | 98238  | - |
| ENSMUSG00000<br>020870 | 6.14   | 5.635  | 2.494  | 0.018375722 | 0.04408075  | Cdc34b        | -                                                         | protein_coding | -      | - |
| ENSMUSG00000<br>020904 | 5.93   | 6.721  | 2.749  | 0.000262441 | 0.001417862 | Cfap52        | cilia and flagella associated protein 52                  | protein_coding | 71860  | - |
| ENSMUSG00000<br>020908 | 6.69   | 6.689  | 2.742  | 0.001272478 | 0.005138237 | Myh3          | myosin, heavy polypeptide 3, skeletal muscle, embryonic   | protein_coding | 17883  | - |
| ENSMUSG00000<br>020910 | 10.37  | 0.181  | -2.462 | 0.000721341 | 0.003226732 | Adprm         | ADP-ribose/CDP-alcohol diphosphatase, manganese dependent | protein_coding | 66358  | - |
| ENSMUSG00000<br>020926 | 5.73   | 6.507  | 2.702  | 0.006853604 | 0.020024782 | Adam11        | a disintegrin and metallopeptidase domain 11              | protein_coding | 11488  | - |
| ENSMUSG00000<br>020961 | 133.87 | 4.02   | 2.007  | 3.58263E-07 | 6.52242E-03 | stonin 2      | stonin 2                                                  | protein_coding | 108800 | - |
| ENSMUSG00000<br>021010 | 69.73  | 4.665  | 2.222  | 7.65179E-10 | 4.0679E-08  | Npas3         | neuronal PAS domain protein 3                             | protein_coding | 27386  | - |
| ENSMUSG00000<br>021018 | 7.28   | 0.075  | -3.732 | 4.34101E-05 | 0.00033278  | Polr2h        | polymerase (RNA) II (DNA directed) polypeptide H          | protein_coding | 245841 | - |
| ENSMUSG00000<br>021047 | 9.82   | 5.184  | 2.374  | 0.000408725 | 0.002036559 | Nova1         | neuro-oncological ventral antigen 1                       | protein_coding | 664883 | - |
| ENSMUSG00000<br>021071 | 14.27  | 4.652  | 2.218  | 0.000726589 | 0.003243744 | Trim9         | tripartite motif-containing 9                             | protein_coding | 94090  | - |
| ENSMUSG00000<br>021098 | 9.61   | 5.285  | 2.402  | 0.003532743 | 0.011727297 | 4930447C04Rik | RIKEN cDNA 4930447C04 gene                                | protein_coding | 75801  | - |
| ENSMUSG00000<br>021118 | 8.33   | 15.005 | 3.907  | 2.13266E-05 | 0.00018738  | Plek2         | pleckstrin 2                                              | protein_coding | 27260  | - |
| ENSMUSG00000<br>021127 | 93.2   | 0.243  | -2.044 | 1.03602E-08 | 3.55919E-07 | Zfp361l       | zinc finger protein 36, C3H type-like 1                   | protein_coding | 12192  | - |
| ENSMUSG00000<br>021130 | 16.11  | 5.136  | 2.361  | 8.21064E-05 | 0.000555695 | Galnt16       | polypeptide N-acetylgalactosaminyltransferase 16          | protein_coding | 108760 | - |
| ENSMUSG00000<br>021131 | 44.69  | 0.183  | -2.446 | 1.09637E-08 | 3.71712E-07 | Erh           | ERH mRNA splicing and mitosis factor                      | protein_coding | 13877  | - |
| ENSMUSG00000<br>021149 | 18.29  | 0.083  | -3.588 | 2.18039E-09 | 1.00719E-07 | Gtpbp4        | GTP binding protein 4                                     | protein_coding | 69237  | - |
| ENSMUSG00000<br>021194 | 5.44   | 23.836 | 4.575  | 2.45708E-07 | 4.75767E-06 | Chga          | chromogranin A                                            | protein_coding | 12652  | - |

|                        |        |        |        |             |             |         |                                                                                       |                |        |          |
|------------------------|--------|--------|--------|-------------|-------------|---------|---------------------------------------------------------------------------------------|----------------|--------|----------|
| ENSMUSG00000<br>021203 | 22.89  | 4.542  | 2.183  | 0.000170216 | 0.001002166 | Otub2   | OTU domain, ubiquitin aldehyde binding 2                                              | protein_coding | 68149  | -        |
| ENSMUSG00000<br>021252 | 12.13  | 0.106  | -3.235 | 2.24179E-06 | 2.93869E-05 | Erg28   | ergosterol biosynthesis 28                                                            | protein_coding | 58520  | -        |
| ENSMUSG00000<br>021260 | 6.72   | 7.518  | 2.91   | 0.001088458 | 0.004521151 | Hhip1l  | hedghog interacting protein-like 1                                                    | protein_coding | 214305 | -        |
| ENSMUSG00000<br>021262 | 238.6  | 0.234  | -2.097 | 1.33936E-08 | 4.35207E-07 | Ev1     | Ena-vasodilator stimulated phosphoprotein                                             | protein_coding | 14026  | -        |
| ENSMUSG00000<br>021263 | 154.55 | 0.22   | -2.187 | 8.7723E-09  | 3.08473E-07 | Degs2   | delta(4)-desaturase, sphingolipid 2                                                   | protein_coding | 70059  | -        |
| ENSMUSG00000<br>021356 | 22.21  | 0.14   | -2.837 | 2.83364E-08 | 7.9311E-07  | Irf4    | interferon regulatory factor 4                                                        | protein_coding | 16364  | IRF      |
| ENSMUSG00000<br>021373 | 32.35  | 4.736  | 2.244  | 5.45724E-06 | 6.12499E-05 | Cap2    | CAP, adenylate cyclase-associated protein, 2 (yeast)                                  | protein_coding | 67252  | -        |
| ENSMUSG00000<br>021376 | 5.96   | 5.608  | 2.488  | 0.002830243 | 0.009791773 | Tpmt    | thiopurine methyltransferase                                                          | protein_coding | 22017  | -        |
| ENSMUSG00000<br>021413 | 47.2   | 0.182  | -2.46  | 3.08249E-10 | 1.80421E-08 | Prpf4b  | pre-mRNA processing factor 4B                                                         | protein_coding | 19134  | -        |
| ENSMUSG00000<br>021423 | 66.1   | 0.202  | -2.306 | 7.93562E-09 | 2.85007E-07 | Ly86    | lymphocyte antigen 86                                                                 | protein_coding | 17084  | -        |
| ENSMUSG00000<br>021476 | 23.88  | 0.232  | -2.106 | 0.000356496 | 0.001817564 | Habp4   | hyaluronic acid binding protein 4                                                     | protein_coding | 56541  | -        |
| ENSMUSG00000<br>021493 | 240.08 | 4.226  | 2.079  | 1.82789E-05 | 0.000165052 | Pdlim7  | PDZ and LIM domain 7                                                                  | protein_coding | 67399  | -        |
| ENSMUSG00000<br>021504 | 30.27  | 0.164  | -2.612 | 4.0536E-10  | 2.29777E-08 | B4galt7 | xylosylprotein beta1,4-galactosyltransferase, polypeptide 7 (galactosyltransferase I) | protein_coding | 218271 | -        |
| ENSMUSG00000<br>021506 | 5.54   | 4.267  | 2.093  | 0.004014024 | 0.013010101 | Pitx1   | paired-like homeodomain transcription factor 1                                        | protein_coding | 18740  | Homeobox |
| ENSMUSG00000<br>021508 | 3.88   | 9.697  | 3.278  | 0.007021861 | 0.020426678 | Cxcl14  | chemokine (C-X-C motif) ligand 14                                                     | protein_coding | 57266  | -        |
| ENSMUSG00000<br>021514 | 14.88  | 0.184  | -2.44  | 0.000199696 | 0.001142057 | Zfp369  | zinc finger protein 369                                                               | protein_coding | 170936 | zf-C2H2  |
| ENSMUSG00000<br>021537 | 25.19  | 0.157  | -2.671 | 1.29404E-06 | 1.87069E-05 | Cetn3   | centrin 3                                                                             | protein_coding | 12626  | -        |
| ENSMUSG00000<br>021567 | 6.74   | 13.928 | 3.8    | 0.000299594 | 0.001579639 | Nkd2    | naked cuticle 2                                                                       | protein_coding | 72293  | -        |
| ENSMUSG00000<br>021575 | 8.2    | 4.096  | 2.034  | 0.002875427 | 0.009926713 | Ahrr    | aryl-hydrocarbon receptor repressor                                                   | protein_coding | 11624  | bHLH     |
| ENSMUSG00000<br>021583 | 40.22  | 0.241  | -2.054 | 3.97671E-07 | 7.12438E-06 | Erap1   | endoplasmic reticulum aminopeptidase 1                                                | protein_coding | 80898  | -        |
| ENSMUSG00000<br>021589 | 9.38   | 5.17   | 2.37   | 0.00057145  | 0.002669886 | Rhobtb3 | Rho-related BTB domain containing 3                                                   | protein_coding | 73296  | -        |
| ENSMUSG00000<br>021596 | 421.13 | 5.329  | 2.414  | 3.50029E-10 | 2.00308E-08 | Mctp1   | multiple C2 domains, transmembrane 1                                                  | protein_coding | 78771  | -        |
| ENSMUSG00000<br>021604 | 7.4    | 11.941 | 3.578  | 6.69312E-06 | 7.18451E-05 | Irx4    | Iroquois homeobox 4                                                                   | protein_coding | 50916  | Homeobox |
| ENSMUSG00000<br>021608 | 43.62  | 0.229  | -2.129 | 5.87066E-09 | 2.26373E-07 | Lpcat1  | lysophosphatidylcholine acyltransferase 1                                             | protein_coding | 210992 | -        |



|                        |         |       |        |             |             |                   |                                                                           |                |        |          |
|------------------------|---------|-------|--------|-------------|-------------|-------------------|---------------------------------------------------------------------------|----------------|--------|----------|
| ENSMUSG00000<br>021624 | 44.13   | 0.216 | -2.211 | 4.97396E-07 | 8.57745E-06 | Cd180             | CD180 antigen                                                             | protein_coding | 17079  | -        |
| ENSMUSG00000<br>021675 | 49.6    | 4.632 | 2.212  | 1.42366E-07 | 3.00739E-06 | F2r2              | coagulation factor II (thrombin)<br>receptor-like 2                       | protein_coding | 14064  | -        |
| ENSMUSG00000<br>021678 | 11.41   | 0.228 | -2.133 | 0.017469021 | 0.042253444 | F2r1              | coagulation factor II (thrombin)<br>receptor-like 1                       | protein_coding | 14063  | -        |
| ENSMUSG00000<br>021685 | 7.83    | 4.974 | 2.314  | 0.000404857 | 0.002020089 | Otp               | orthopedia homeobox                                                       | protein_coding | 18420  | Homeobox |
| ENSMUSG00000<br>021687 | 67.59   | 4.044 | 2.016  | 7.99225E-07 | 1.25536E-05 | Scamp1            | secretory carrier membrane protein 1                                      | protein_coding | 107767 | -        |
| ENSMUSG00000<br>021696 | 24.48   | 4.402 | 2.138  | 2.57525E-06 | 3.29592E-05 | Elov17            | ELOVL family member 7,<br>elongation of long chain fatty acids<br>(yeast) | protein_coding | 74559  | -        |
| ENSMUSG00000<br>021704 | 5.53    | 0.097 | -3.37  | 0.000221896 | 0.001241362 | Mtx3              | metaxin 3                                                                 | protein_coding | 382793 | -        |
| ENSMUSG00000<br>021730 | 33.93   | 4.321 | 2.111  | 3.90635E-08 | 1.03562E-06 | Hcn1              | hyperpolarization-activated, cyclic<br>nucleotide-gated K+ 1              | protein_coding | 15165  | -        |
| ENSMUSG00000<br>021737 | 25.34   | 0.24  | -2.056 | 8.42556E-05 | 0.00056801  | Psm6              | proteasome (prosome, macropain)<br>26S subunit, non-ATPase, 6             | protein_coding | 66413  | -        |
| ENSMUSG00000<br>021748 | 33.73   | 0.163 | -2.613 | 2.5448E-08  | 7.29306E-07 | Pdhb              | pyruvate dehydrogenase (lipoamide)<br>beta                                | protein_coding | 68263  | -        |
| ENSMUSG00000<br>021756 | 54.68   | 0.19  | -2.396 | 4.67515E-10 | 2.63347E-08 | Il6st             | interleukin 6 signal transducer                                           | protein_coding | 16195  | -        |
| ENSMUSG00000<br>021758 | 7.85    | 5.203 | 2.379  | 0.001006956 | 0.004246418 | Ddx4              | DEAD (Asp-Glu-Ala-Asp) box<br>polypeptide 4                               | protein_coding | 13206  | -        |
| ENSMUSG00000<br>021798 | 8.85    | 5.985 | 2.581  | 0.000589895 | 0.002743934 | Ldb3              | LIM domain binding 3                                                      | protein_coding | 24131  | -        |
| ENSMUSG00000<br>021807 | 42.09   | 0.226 | -2.145 | 2.81209E-08 | 7.88305E-07 | 2700060E02R<br>ik | RNA transcription, translation and<br>transport factor                    | protein_coding | 68045  | -        |
| ENSMUSG00000<br>021811 | 41.94   | 0.109 | -3.201 | 5.03492E-11 | 4.03895E-09 | Dnajc9            | DnaJ heat shock protein family<br>(Hsp40) member C9                       | protein_coding | 108671 | -        |
| ENSMUSG00000<br>021832 | 23.07   | 0.235 | -2.088 | 1.48496E-05 | 0.000138903 | Psmc6             | proteasome (prosome, macropain)<br>26S subunit, ATPase, 6                 | protein_coding | 67089  | -        |
| ENSMUSG00000<br>021930 | 5.67    | 0.193 | -2.376 | 0.007890024 | 0.022422244 | Spryd7            | SPRY domain containing 7                                                  | protein_coding | 66674  | -        |
| ENSMUSG00000<br>021944 | 13.04   | 4.786 | 2.259  | 0.004041464 | 0.013081274 | Gata4             | GATA binding protein 4                                                    | protein_coding | 14463  | zf-GATA  |
| ENSMUSG00000<br>021974 | 9.83    | 7.849 | 2.973  | 0.001228744 | 0.004995026 | Fgf9              | fibroblast growth factor 9                                                | protein_coding | 14180  | -        |
| ENSMUSG00000<br>021986 | 26.76   | 5.256 | 2.394  | 1.15033E-06 | 1.69567E-05 | Amer2             | APC membrane recruitment 2                                                | protein_coding | 72125  | -        |
| ENSMUSG00000<br>021996 | 870.82  | 4.211 | 2.074  | 6.77993E-06 | 7.26467E-05 | Esd               | esterase D/formylglutathione<br>hydrolase                                 | protein_coding | 13885  | -        |
| ENSMUSG00000<br>021997 | 10.25   | 5.163 | 2.368  | 0.000194385 | 0.001115585 | Lrrc63            | leucine rich repeat containing 63                                         | protein_coding | 70859  | -        |
| ENSMUSG00000<br>022010 | 8465.79 | 6.745 | 2.754  | 7.49453E-08 | 1.75579E-06 | Tsc22d1           | TSC22 domain family, member 1                                             | protein_coding | 21807  | TSC22    |
| ENSMUSG00000<br>022037 | 1408.19 | 5.868 | 2.553  | 2.15242E-08 | 6.36133E-07 | Clu               | clusterin                                                                 | protein_coding | 12759  | -        |

|                        |        |        |        |             |             |          |                                                                     |                |        |         |
|------------------------|--------|--------|--------|-------------|-------------|----------|---------------------------------------------------------------------|----------------|--------|---------|
| ENSMUSG00000<br>022076 | 21.1   | 4.123  | 2.044  | 0.000408808 | 0.002036559 | Klhl1    | kelch-like 1                                                        | protein_coding | 93688  | -       |
| ENSMUSG00000<br>022103 | 9.58   | 5.09   | 2.348  | 5.29785E-05 | 0.000390145 | Gfra2    | glial cell line derived neurotrophic factor family receptor alpha 2 | protein_coding | 14586  | -       |
| ENSMUSG00000<br>022109 | 18.85  | 0.155  | -2.685 | 6.41067E-06 | 6.95192E-05 | Med4     | mediator complex subunit 4                                          | protein_coding | 67381  | -       |
| ENSMUSG00000<br>022228 | 23.39  | 0.143  | -2.807 | 2.44216E-09 | 1.11096E-07 | Zscan26  | zinc finger and SCAN domain containing 26                           | protein_coding | 432731 | zf-C2H2 |
| ENSMUSG00000<br>022234 | 121.25 | 0.176  | -2.503 | 1.46837E-13 | 2.72012E-11 | Cct5     | chaperonin containing Tcp1, subunit 5 (epsilon)                     | protein_coding | 12465  | -       |
| ENSMUSG00000<br>022241 | 16.25  | 0.245  | -2.031 | 0.00013518  | 0.000835009 | Tars     | threonyl-tRNA synthetase                                            | protein_coding | 110960 | -       |
| ENSMUSG00000<br>022245 | 10.24  | 7.641  | 2.934  | 9.19247E-05 | 0.000608172 | Skor1    | SKI family transcriptional corepressor 1                            | protein_coding | 207667 | -       |
| ENSMUSG00000<br>022248 | 7.74   | 0.137  | -2.868 | 0.000140568 | 0.000860893 | Rad1     | RAD1 checkpoint DNA exonuclease                                     | protein_coding | 19355  | -       |
| ENSMUSG00000<br>022269 | 11.74  | 4.549  | 2.185  | 0.000106867 | 0.000690007 | March11  | membrane-associated ring finger (C3HC4) 11                          | protein_coding | 211147 | -       |
| ENSMUSG00000<br>022303 | 53.23  | 7.392  | 2.886  | 3.48532E-13 | 5.79886E-11 | Dcstamp  | dendrocyte expressed seven transmembrane protein                    | protein_coding | 75766  | -       |
| ENSMUSG00000<br>022309 | 85.82  | 4.81   | 2.266  | 3.94554E-09 | 1.61866E-07 | Angpt1   | angiotensin 1                                                       | protein_coding | 11600  | -       |
| ENSMUSG00000<br>022322 | 5.81   | 6.641  | 2.731  | 0.003993512 | 0.012955303 | Shcgp1   | Shc SH2-domain binding protein 1                                    | protein_coding | 20419  | -       |
| ENSMUSG00000<br>022323 | 134.12 | 4.583  | 2.196  | 2.8725E-08  | 8.00246E-07 | Rida     | reactive intermediate imine deaminase A homolog                     | protein_coding | 15473  | -       |
| ENSMUSG00000<br>022336 | 115.47 | 0.104  | -3.272 | 8.19258E-13 | 1.24793E-10 | Eif3e    | eukaryotic translation initiation factor 3, subunit E               | protein_coding | 16341  | -       |
| ENSMUSG00000<br>022338 | 14.79  | 0.166  | -2.589 | 1.27319E-05 | 0.000122146 | Eny2     | ENY2 transcription and export complex 2 subunit                     | protein_coding | 223527 | -       |
| ENSMUSG00000<br>022357 | 4.45   | 11.86  | 3.568  | 0.001057802 | 0.004421439 | Klhl38   | kelch-like 38                                                       | protein_coding | 268807 | -       |
| ENSMUSG00000<br>022366 | 13.77  | 4.386  | 2.133  | 0.000336275 | 0.001737356 | Slc22a22 | solute carrier family 22 (organic cation transporter), member 22    | protein_coding | 210463 | -       |
| ENSMUSG00000<br>022370 | 19.22  | 0.232  | -2.109 | 2.43879E-05 | 0.000208283 | Mrpl13   | mitochondrial ribosomal protein L13                                 | protein_coding | 68537  | -       |
| ENSMUSG00000<br>022371 | 18.35  | 4.075  | 2.027  | 9.05626E-05 | 0.000602042 | Col14a1  | collagen, type XIV, alpha 1                                         | protein_coding | 12818  | -       |
| ENSMUSG00000<br>022407 | 23.94  | 0.146  | -2.778 | 3.33956E-05 | 0.000269459 | Adsl     | adenylosuccinate lyase                                              | protein_coding | 11564  | -       |
| ENSMUSG00000<br>022421 | 13.86  | 4.275  | 2.096  | 0.000292342 | 0.001548448 | Nptxr    | neuronal pentraxin receptor                                         | protein_coding | 73340  | -       |
| ENSMUSG00000<br>022432 | 69.12  | 32.964 | 5.043  | 9.33945E-06 | 9.43342E-05 | Smc1b    | structural maintenance of chromosomes 1B                            | protein_coding | 140557 | -       |
| ENSMUSG00000<br>022434 | 12.04  | 0.21   | -2.252 | 0.000100047 | 0.000654203 | Fam118a  | family with sequence similarity 118, member A                       | protein_coding | 73225  | -       |
| ENSMUSG00000<br>022438 | 824.47 | 4.187  | 2.066  | 9.79514E-07 | 1.48531E-05 | Parvb    | parvin, beta                                                        | protein_coding | 170736 | -       |

|                        |        |       |        |             |             |          |                                                                                                |                |        |               |
|------------------------|--------|-------|--------|-------------|-------------|----------|------------------------------------------------------------------------------------------------|----------------|--------|---------------|
| ENSMUSG00000<br>022449 | 18.47  | 5.807 | 2.538  | 0.001361893 | 0.005428669 | Adamts20 | a disintegrin-like and metallopeptidase (reprolysin type) with thrombospondin type 1 motif, 20 | protein_coding | 223838 | -             |
| ENSMUSG00000<br>022454 | 26.74  | 4.586 | 2.197  | 2.69593E-07 | 5.14071E-06 | Nell2    | NEL-like 2                                                                                     | protein_coding | 54003  | -             |
| ENSMUSG00000<br>022463 | 88.19  | 0.182 | -2.455 | 5.2207E-10  | 2.90436E-08 | Srebf2   | sterol regulatory element binding factor 2                                                     | protein_coding | 20788  | bHLH          |
| ENSMUSG00000<br>022500 | 975.66 | 6.131 | 2.616  | 3.02757E-09 | 1.31965E-07 | Litaf    | LPS-induced TN factor                                                                          | protein_coding | 56722  | zf-LITAF-like |
| ENSMUSG00000<br>022503 | 40.38  | 0.216 | -2.21  | 1.44062E-08 | 4.61315E-07 | Nubp1    | nucleotide binding protein 1                                                                   | protein_coding | 26425  | -             |
| ENSMUSG00000<br>022504 | 97.54  | 0.041 | -4.601 | 2.731E-25   | 2.72629E-22 | Ciita    | class II transactivator                                                                        | protein_coding | 12265  | -             |
| ENSMUSG00000<br>022510 | 17.36  | 4.217 | 2.076  | 9E-05       | 0.000599633 | Trp63    | transformation related protein 63                                                              | protein_coding | 22061  | P53           |
| ENSMUSG00000<br>022516 | 22.83  | 0.182 | -2.461 | 2.02706E-06 | 2.7041E-05  | Nudt16l1 | nudix (nucleoside diphosphate linked moiety X)-type motif 16-like 1                            | protein_coding | 66911  | -             |
| ENSMUSG00000<br>022523 | 16.95  | 5.455 | 2.448  | 5.87899E-05 | 0.000423745 | Fgf12    | fibroblast growth factor 12                                                                    | protein_coding | 14167  | -             |
| ENSMUSG00000<br>022544 | 17.82  | 0.166 | -2.589 | 4.56847E-07 | 8.00105E-06 | Eef2kmt  | eukaryotic elongation factor 2 lysine methyltransferase                                        | protein_coding | 70511  | -             |
| ENSMUSG00000<br>022545 | 18.73  | 0.199 | -2.33  | 9.09092E-06 | 9.23952E-05 | Ercc4    | excision repair cross-complementing rodent repair deficiency, complementation group 4          | protein_coding | 50505  | -             |
| ENSMUSG00000<br>022551 | 46.08  | 0.236 | -2.084 | 9.86303E-09 | 3.42802E-07 | Cyc1     | cytochrome c-1                                                                                 | protein_coding | 66445  | -             |
| ENSMUSG00000<br>022560 | 9.98   | 0.205 | -2.29  | 0.001092575 | 0.004535109 | Slc52a2  | solute carrier protein 52, member 2                                                            | protein_coding | 52710  | -             |
| ENSMUSG00000<br>022571 | 13.35  | 0.101 | -3.305 | 3.1334E-06  | 3.87769E-05 | Pycrl    | pyrroline-5-carboxylate reductase-like                                                         | protein_coding | 66194  | -             |
| ENSMUSG00000<br>022594 | 16.68  | 0.209 | -2.257 | 0.000112243 | 0.000716734 | Lynx1    | Ly6/neurotoxin 1                                                                               | protein_coding | 23936  | -             |
| ENSMUSG00000<br>022615 | 8.77   | 0.185 | -2.434 | 0.002251966 | 0.008169913 | Tymp     | thymidine phosphorylase                                                                        | protein_coding | 72962  | -             |
| ENSMUSG00000<br>022621 | 4.92   | 4.939 | 2.304  | 0.008967392 | 0.024843519 | Rabl2    | RAB, member RAS oncogene family-like 2                                                         | protein_coding | 68708  | -             |
| ENSMUSG00000<br>022634 | 126.65 | 4.549 | 2.185  | 2.80623E-10 | 1.66971E-08 | Yaf2     | YY1 associated factor 2                                                                        | protein_coding | 67057  | -             |
| ENSMUSG00000<br>022657 | 39.6   | 0.23  | -2.121 | 4.93174E-06 | 5.63014E-05 | Cd96     | CD96 antigen                                                                                   | protein_coding | 84544  | -             |
| ENSMUSG00000<br>022659 | 13.11  | 5.563 | 2.476  | 0.005292736 | 0.016279558 | Gcsam    | germinal center associated, signaling and motility                                             | protein_coding | 14525  | -             |
| ENSMUSG00000<br>022661 | 15.87  | 0.151 | -2.724 | 5.48025E-05 | 0.000401773 | Cd200    | CD200 antigen                                                                                  | protein_coding | 17470  | -             |
| ENSMUSG00000<br>022668 | 13.04  | 0.226 | -2.147 | 0.000654597 | 0.002980855 | Gtpbp8   | GTP-binding protein 8 (putative)                                                               | protein_coding | 66067  | -             |

|                        |        |       |        |             |             |          |                                                                                                   |                |        |   |
|------------------------|--------|-------|--------|-------------|-------------|----------|---------------------------------------------------------------------------------------------------|----------------|--------|---|
| ENSMUSG00000<br>022673 | 14.1   | 0.176 | -2.505 | 5.52628E-05 | 0.000403994 | Mcm4     | minichromosome maintenance complex component 4                                                    | protein_coding | 17217  | - |
| ENSMUSG00000<br>022674 | 14.05  | 0.171 | -2.55  | 4.72922E-06 | 5.44042E-05 | Ube2v2   | ubiquitin-conjugating enzyme E2 variant 2                                                         | protein_coding | 70620  | - |
| ENSMUSG00000<br>022682 | 19.28  | 0.231 | -2.117 | 4.07322E-05 | 0.000316163 | Rrn3     | RRN3 RNA polymerase I transcription factor homolog (yeast)                                        | protein_coding | 106298 | - |
| ENSMUSG00000<br>022683 | 9.93   | 4.683 | 2.227  | 0.008119927 | 0.022952174 | Pla2g10  | phospholipase A2, group X                                                                         | protein_coding | 26565  | - |
| ENSMUSG00000<br>022686 | 54.31  | 0.022 | -5.496 | 1.38431E-28 | 2.07289E-25 | B3gnt5   | UDP-GlcNAc:betaGal beta-1,3-N-acetylglucosaminyltransferase 5                                     | protein_coding | 108105 | - |
| ENSMUSG00000<br>022696 | 77.54  | 0.247 | -2.019 | 4.35058E-07 | 7.69444E-06 | Sid1     | SID1 transmembrane family, member 1                                                               | protein_coding | 320007 | - |
| ENSMUSG00000<br>022721 | 43.73  | 0.204 | -2.295 | 5.94747E-07 | 9.86796E-06 | Trmt2a   | TRM2 tRNA methyltransferase 2A                                                                    | protein_coding | 15547  | - |
| ENSMUSG00000<br>022754 | 4.54   | 8.048 | 3.009  | 0.011478742 | 0.030234759 | Tmem45a  | transmembrane protein 45a                                                                         | protein_coding | 56277  | - |
| ENSMUSG00000<br>022769 | 24.93  | 0.223 | -2.164 | 7.3485E-07  | 1.17478E-05 | Sdf2l1   | stromal cell-derived factor 2-like 1                                                              | protein_coding | 64136  | - |
| ENSMUSG00000<br>022774 | 26.05  | 0.205 | -2.286 | 1.45908E-05 | 0.000136981 | Ncbp2    | nuclear cap binding protein subunit 2                                                             | protein_coding | 68092  | - |
| ENSMUSG00000<br>022787 | 11.73  | 0.246 | -2.025 | 0.005682084 | 0.017267859 | Wdr53    | WD repeat domain 53                                                                               | protein_coding | 68980  | - |
| ENSMUSG00000<br>022799 | 17.52  | 5.725 | 2.517  | 0.00016582  | 0.000981108 | Arhgap31 | Rho GTPase activating protein 31                                                                  | protein_coding | 12549  | - |
| ENSMUSG00000<br>022802 | 32.8   | 4.081 | 2.029  | 0.004511479 | 0.01427483  | Lmln     | leishmanolysin-like (metallopeptidase M8 family)                                                  | protein_coding | 239833 | - |
| ENSMUSG00000<br>022803 | 36.23  | 6.272 | 2.649  | 2.26307E-10 | 1.40256E-08 | Popdc2   | popeye domain containing 2                                                                        | protein_coding | 64082  | - |
| ENSMUSG00000<br>022805 | 6.15   | 5.184 | 2.374  | 0.005186891 | 0.016022562 | Maats1   | MYCBP-associated, testis expressed 1                                                              | protein_coding | 320214 | - |
| ENSMUSG00000<br>022816 | 6.9    | 4.547 | 2.185  | 0.010948987 | 0.029177272 | Fstl1    | follistatin-like 1                                                                                | protein_coding | 14314  | - |
| ENSMUSG00000<br>022817 | 555.79 | 4.199 | 2.07   | 4.81127E-07 | 8.36109E-06 | Itgb5    | integrin beta 5                                                                                   | protein_coding | 16419  | - |
| ENSMUSG00000<br>022857 | 7.35   | 4.115 | 2.041  | 0.004335066 | 0.013863107 | Tmprss15 | transmembrane protease, serine 15                                                                 | protein_coding | 19146  | - |
| ENSMUSG00000<br>022885 | 100.87 | 0.189 | -2.401 | 7.09758E-08 | 1.68032E-06 | St6gal1  | beta galactoside alpha 2,6 sialyltransferase 1                                                    | protein_coding | 20440  | - |
| ENSMUSG00000<br>022887 | 7.99   | 5.103 | 2.351  | 0.0019521   | 0.007268396 | Masp1    | mannan-binding lectin serine peptidase 1                                                          | protein_coding | 17174  | - |
| ENSMUSG00000<br>022949 | 6.97   | 4.691 | 2.23   | 0.002069521 | 0.007620332 | Clic6    | chloride intracellular channel 6                                                                  | protein_coding | 209195 | - |
| ENSMUSG00000<br>022992 | 46.48  | 0.147 | -2.768 | 2.01003E-08 | 6.06009E-07 | Kansl2   | KAT8 regulatory NSL complex subunit 2                                                             | protein_coding | 69612  | - |
| ENSMUSG00000<br>022997 | 6.7    | 4.721 | 2.239  | 0.011378617 | 0.030054736 | Wnt1     | wingless-type MMTV integration site family, member 1                                              | protein_coding | 22408  | - |
| ENSMUSG00000<br>023018 | 41.14  | 0.168 | -2.574 | 1.55012E-10 | 1.0203E-08  | Smardc1  | SWI/SNF related, matrix associated, actin dependent regulator of chromatin, subfamily d, member 1 | protein_coding | 83797  | - |

|                        |        |        |        |             |             |          |                                                                                             |                |        |   |
|------------------------|--------|--------|--------|-------------|-------------|----------|---------------------------------------------------------------------------------------------|----------------|--------|---|
| ENSMUSG00000<br>023019 | 4.14   | 5.483  | 2.455  | 0.005647501 | 0.017173794 | Gpd1     | glycerol-3-phosphate dehydrogenase<br>1 (soluble)                                           | protein_coding | 14555  | - |
| ENSMUSG00000<br>023033 | 33.7   | 5.16   | 2.367  | 1.079E-08   | 3.67903E-07 | Scn8a    | sodium channel, voltage-gated, type<br>VIII, alpha                                          | protein_coding | 20273  | - |
| ENSMUSG00000<br>023039 | 12.14  | 4.326  | 2.113  | 0.003277502 | 0.011045281 | Krt7     | keratin 7                                                                                   | protein_coding | 110310 | - |
| ENSMUSG00000<br>023067 | 46.06  | 5.587  | 2.482  | 5.43727E-05 | 0.000399111 | Cdkn1a   | cyclin-dependent kinase inhibitor 1A<br>(P21)                                               | protein_coding | 12575  | - |
| ENSMUSG00000<br>023092 | 479.08 | 5.317  | 2.411  | 9.42704E-08 | 2.12274E-06 | Fhl1     | four and a half LIM domains 1                                                               | protein_coding | 14199  | - |
| ENSMUSG00000<br>023106 | 28.24  | 0.25   | -2.003 | 2.69673E-06 | 3.41973E-05 | Denr     | density-regulated protein                                                                   | protein_coding | 68184  | - |
| ENSMUSG00000<br>023110 | 19     | 0.199  | -2.328 | 0.000435405 | 0.002148805 | Prmt5    | protein arginine N-methyltransferase<br>5                                                   | protein_coding | 27374  | - |
| ENSMUSG00000<br>023150 | 83.96  | 0.243  | -2.038 | 1.00025E-08 | 3.4631E-07  | Ivns1abp | influenza virus NS1A binding<br>protein                                                     | protein_coding | 117198 | - |
| ENSMUSG00000<br>023156 | 16.1   | 0.244  | -2.035 | 0.000398801 | 0.001995332 | Rpp14    | ribonuclease P 14 subunit                                                                   | protein_coding | 67053  | - |
| ENSMUSG00000<br>023191 | 5.58   | 8.797  | 3.137  | 0.001649038 | 0.00634509  | P3h3     | prolyl 3-hydroxylase 3                                                                      | protein_coding | 14789  | - |
| ENSMUSG00000<br>023274 | 68.74  | 0.223  | -2.165 | 9.82272E-09 | 3.42063E-07 | Cd4      | CD4 antigen                                                                                 | protein_coding | 12504  | - |
| ENSMUSG00000<br>023403 | 6.72   | 4.22   | 2.077  | 0.015874891 | 0.0390708   | Stk31    | serine threonine kinase 31                                                                  | protein_coding | 77485  | - |
| ENSMUSG00000<br>023577 | 6.34   | 8.988  | 3.168  | 0.00026927  | 0.001448216 | Iqcf3    | IQ motif containing F3                                                                      | protein_coding | 68265  | - |
| ENSMUSG00000<br>023828 | 19.95  | 11.111 | 3.474  | 2.24377E-09 | 1.02331E-07 | Slc22a3  | solute carrier family 22 (organic<br>cation transporter), member 3                          | protein_coding | 20519  | - |
| ENSMUSG00000<br>023886 | 13.1   | 6.717  | 2.748  | 0.000772574 | 0.00340923  | Smoc2    | SPARC related modular calcium<br>binding 2                                                  | protein_coding | 64074  | - |
| ENSMUSG00000<br>023931 | 10.52  | 4.174  | 2.061  | 0.000530315 | 0.002514975 | Efhb     | EF hand domain family, member B                                                             | protein_coding | 211482 | - |
| ENSMUSG00000<br>023947 | 27.56  | 0.164  | -2.606 | 1.47858E-05 | 0.000138418 | Nfkbie   | nuclear factor of kappa light<br>polypeptide gene enhancer in B cells<br>inhibitor, epsilon | protein_coding | 18037  | - |
| ENSMUSG00000<br>023951 | 17.33  | 5.075  | 2.344  | 0.00028232  | 0.001503559 | Vegfa    | vascular endothelial growth factor A                                                        | protein_coding | 22339  | - |
| ENSMUSG00000<br>023959 | 21.7   | 5.492  | 2.457  | 0.001072563 | 0.004463383 | Clic5    | chloride intracellular channel 5                                                            | protein_coding | 224796 | - |
| ENSMUSG00000<br>023960 | 8.86   | 4.905  | 2.294  | 0.006542919 | 0.019311012 | Enpp5    | ectonucleotide<br>pyrophosphatase/phosphodiesterase<br>5                                    | protein_coding | 83965  | - |
| ENSMUSG00000<br>023961 | 8.41   | 0.246  | -2.025 | 0.00748921  | 0.021522469 | Enpp4    | ectonucleotide<br>pyrophosphatase/phosphodiesterase<br>4                                    | protein_coding | 224794 | - |
| ENSMUSG00000<br>023967 | 16.43  | 0.179  | -2.482 | 6.60045E-06 | 7.102E-05   | Mrps18a  | mitochondrial ribosomal protein<br>S18A                                                     | protein_coding | 68565  | - |
| ENSMUSG00000<br>023972 | 10.89  | 7.855  | 2.974  | 4.96571E-05 | 0.000370552 | Ptk7     | PTK7 protein tyrosine kinase 7                                                              | protein_coding | 71461  | - |

|                        |        |        |        |             |             |                   |                                                                                                |                      |        |          |
|------------------------|--------|--------|--------|-------------|-------------|-------------------|------------------------------------------------------------------------------------------------|----------------------|--------|----------|
| ENSMUSG00000<br>023992 | 11.23  | 5.241  | 2.39   | 0.001657013 | 0.006370319 | Trem2             | triggering receptor expressed on myeloid cells 2                                               | protein_coding       | 83433  | -        |
| ENSMUSG00000<br>024013 | 73.06  | 0.149  | -2.745 | 4.23055E-12 | 4.84196E-10 | Fgd2              | FYVE, RhoGEF and PH domain containing 2                                                        | protein_coding       | 26382  | -        |
| ENSMUSG00000<br>024049 | 11.96  | 5.026  | 2.329  | 3.66614E-05 | 0.000290206 | Myom1             | myomesin 1                                                                                     | protein_coding       | 17929  | -        |
| ENSMUSG00000<br>024069 | 9.04   | 0.203  | -2.3   | 0.007611861 | 0.021795003 | Slc30a6           | solute carrier family 30 (zinc transporter), member 6                                          | protein_coding       | 210148 | -        |
| ENSMUSG00000<br>024078 | 300.64 | 4.037  | 2.013  | 3.88263E-08 | 1.03322E-06 | Ttc27             | tetratricopeptide repeat domain 27                                                             | protein_coding       | 74196  | -        |
| ENSMUSG00000<br>024097 | 73.22  | 0.157  | -2.671 | 8.00068E-15 | 2.05377E-12 | Srsf7             | serine/arginine-rich splicing factor 7                                                         | protein_coding       | 225027 | -        |
| ENSMUSG00000<br>024134 | 6.54   | 7.068  | 2.821  | 0.000418569 | 0.002075979 | Six2              | sine oculis-related homeobox 2                                                                 | protein_coding       | 20472  | Homeobox |
| ENSMUSG00000<br>024142 | 13.69  | 0.134  | -2.904 | 9.21146E-06 | 9.33037E-05 | Mlst8             | MTOR associated protein, LST8 homolog ( <i>S. cerevisiae</i> )                                 | protein_coding       | 56716  | -        |
| ENSMUSG00000<br>024181 | 19.25  | 0.184  | -2.441 | 3.23127E-06 | 3.97689E-05 | Mrpl28            | mitochondrial ribosomal protein L28                                                            | protein_coding       | 68611  | -        |
| ENSMUSG00000<br>024205 | 23.1   | 0.237  | -2.078 | 9.69877E-05 | 0.000636745 | Rpl36-ps2         | -                                                                                              | processed_pseudogene | -      | -        |
| ENSMUSG00000<br>024207 | 7.52   | 16.318 | 4.028  | 1.01145E-06 | 1.52473E-05 | Acsbg2            | acyl-CoA synthetase bubblegum family member 2                                                  | protein_coding       | 328845 | -        |
| ENSMUSG00000<br>024211 | 74.62  | 4.172  | 2.061  | 4.65544E-07 | 8.12961E-06 | Grm8              | glutamate receptor, metabotropic 8                                                             | protein_coding       | 14823  | -        |
| ENSMUSG00000<br>024215 | 4.82   | 5.03   | 2.331  | 0.017066409 | 0.041463804 | Spdef             | SAM pointed domain containing ets transcription factor                                         | protein_coding       | 30051  | ETS      |
| ENSMUSG00000<br>024245 | 6.29   | 4.906  | 2.294  | 0.002309251 | 0.008335663 | Tmem178           | transmembrane protein 178                                                                      | protein_coding       | 68027  | -        |
| ENSMUSG00000<br>024299 | 61.51  | 0.241  | -2.053 | 7.78762E-09 | 2.81561E-07 | Adamts10          | a disintegrin-like and metallopeptidase (reprolysin type) with thrombospondin type 1 motif, 10 | protein_coding       | 224697 | -        |
| ENSMUSG00000<br>024325 | 19.5   | 0.23   | -2.12  | 4.54039E-05 | 0.000345998 | Ring1             | ring finger protein 1                                                                          | protein_coding       | 19763  | -        |
| ENSMUSG00000<br>024334 | 59.72  | 0.057  | -4.133 | 3.05284E-14 | 6.83099E-12 | H2-Oa             | histocompatibility 2, O region alpha locus                                                     | protein_coding       | 15001  | -        |
| ENSMUSG00000<br>024347 | 7.92   | 14.081 | 3.816  | 9.79021E-07 | 1.48531E-05 | Psd2              | pleckstrin and Sec7 domain containing 2                                                        | protein_coding       | 74002  | -        |
| ENSMUSG00000<br>024349 | 41.3   | 0.222  | -2.17  | 2.4627E-07  | 4.76141E-06 | Tmem173           | transmembrane protein 173                                                                      | protein_coding       | 72512  | -        |
| ENSMUSG00000<br>024353 | 51.05  | 0.102  | -3.298 | 2.69349E-08 | 7.64604E-07 | Mzb1              | marginal zone B and B1 cell-specific protein 1                                                 | protein_coding       | 69816  | -        |
| ENSMUSG00000<br>024376 | 27.92  | 5.207  | 2.38   | 1.66256E-07 | 3.40372E-06 | Epb414a           | erythrocyte membrane protein band 4.1 like 4a                                                  | protein_coding       | 13824  | -        |
| ENSMUSG00000<br>024436 | 8.58   | 0.118  | -3.083 | 8.18551E-05 | 0.000554621 | Mrps18b           | mitochondrial ribosomal protein S18B                                                           | protein_coding       | 66973  | -        |
| ENSMUSG00000<br>024442 | 17.14  | 0.158  | -2.666 | 1.76572E-06 | 2.42942E-05 | 0610009O20R<br>ik | DAP3 binding cell death enhancer 1                                                             | protein_coding       | 66839  | -        |

|                        |         |       |        |             |             |          |                                                                                                       |                |        |     |
|------------------------|---------|-------|--------|-------------|-------------|----------|-------------------------------------------------------------------------------------------------------|----------------|--------|-----|
| ENSMUSG00000<br>024500 | 29.25   | 4.149 | 2.053  | 0.002508488 | 0.008895799 | Ppp2r2b  | protein phosphatase 2, regulatory subunit B, beta                                                     | protein_coding | 72930  | -   |
| ENSMUSG00000<br>024501 | 15.37   | 6.383 | 2.674  | 2.0797E-05  | 0.000183727 | Dpysl3   | dihydropyrimidinase-like 3                                                                            | protein_coding | 22240  | -   |
| ENSMUSG00000<br>024511 | 124.89  | 5.664 | 2.502  | 9.65392E-13 | 1.44559E-10 | Rab27b   | RAB27B, member RAS oncogene family                                                                    | protein_coding | 80718  | -   |
| ENSMUSG00000<br>024534 | 19.26   | 6.921 | 2.791  | 5.89667E-07 | 9.80178E-06 | Sncaip   | synuclein, alpha interacting protein (synphilin)                                                      | protein_coding | 67847  | -   |
| ENSMUSG00000<br>024535 | 21.08   | 4.49  | 2.167  | 3.4655E-05  | 0.000278371 | Snx24    | sorting nexin 24                                                                                      | protein_coding | 69226  | -   |
| ENSMUSG00000<br>024556 | 32.88   | 0.234 | -2.095 | 6.46658E-07 | 1.06117E-05 | Me2      | malic enzyme 2, NAD(+)-dependent, mitochondrial                                                       | protein_coding | 107029 | -   |
| ENSMUSG00000<br>024610 | 1517.78 | 0.025 | -5.317 | 6.63678E-27 | 7.45352E-24 | Cd74     | CD74 antigen (invariant polypeptide of major histocompatibility complex, class II antigen-associated) | protein_coding | 16149  | -   |
| ENSMUSG00000<br>024613 | 63.46   | 0.236 | -2.081 | 2.36213E-08 | 6.86815E-07 | Tcof1    | treacle ribosome biogenesis factor 1                                                                  | protein_coding | 21453  | -   |
| ENSMUSG00000<br>024622 | 22.91   | 0.21  | -2.248 | 1.30702E-06 | 1.88187E-05 | Hmgxb3   | HMG box domain containing 3                                                                           | protein_coding | 106894 | HMG |
| ENSMUSG00000<br>024645 | 12.32   | 0.082 | -3.607 | 1.39453E-07 | 2.95152E-06 | Timm21   | translocase of inner mitochondrial membrane 21                                                        | protein_coding | 67105  | -   |
| ENSMUSG00000<br>024665 | 27.59   | 7.582 | 2.923  | 1.79097E-10 | 1.1618E-08  | Fads2    | fatty acid desaturase 2                                                                               | protein_coding | 56473  | -   |
| ENSMUSG00000<br>024669 | 61.41   | 0.124 | -3.008 | 1.70103E-14 | 4.07545E-12 | Cd5      | CD5 antigen                                                                                           | protein_coding | 12507  | -   |
| ENSMUSG00000<br>024670 | 81.72   | 0.243 | -2.038 | 2.0369E-09  | 9.53151E-08 | Cd6      | CD6 antigen                                                                                           | protein_coding | 12511  | -   |
| ENSMUSG00000<br>024673 | 172.8   | 0.008 | -6.925 | 1.33067E-39 | 5.97771E-36 | Ms4a1    | membrane-spanning 4-domains, subfamily A, member 1                                                    | protein_coding | 12482  | -   |
| ENSMUSG00000<br>024675 | 108.26  | 0.192 | -2.384 | 2.78788E-10 | 1.6643E-08  | Ms4a4c   | membrane-spanning 4-domains, subfamily A, member 4C                                                   | protein_coding | 64380  | -   |
| ENSMUSG00000<br>024677 | 305.47  | 0.212 | -2.236 | 5.57881E-11 | 4.41666E-09 | Ms4a6b   | membrane-spanning 4-domains, subfamily A, member 6B                                                   | protein_coding | 69774  | -   |
| ENSMUSG00000<br>024680 | 8.31    | 0.123 | -3.02  | 5.54155E-05 | 0.000404548 | Ms4a2    | membrane-spanning 4-domains, subfamily A, member 2                                                    | protein_coding | 14126  | -   |
| ENSMUSG00000<br>024683 | 8.84    | 0.161 | -2.637 | 0.001487638 | 0.005833858 | Mrpl16   | mitochondrial ribosomal protein L16                                                                   | protein_coding | 94063  | -   |
| ENSMUSG00000<br>024696 | 32.36   | 0.142 | -2.812 | 2.30118E-10 | 1.42096E-08 | Lpxn     | leupaxin                                                                                              | protein_coding | 107321 | -   |
| ENSMUSG00000<br>024713 | 75.65   | 5.212 | 2.382  | 8.28913E-06 | 8.59878E-05 | Pcsk5    | proprotein convertase subtilisin/kexin type 5                                                         | protein_coding | 18552  | -   |
| ENSMUSG00000<br>024735 | 31.75   | 0.093 | -3.422 | 6.05223E-11 | 4.68761E-09 | Prpf19   | pre-mRNA processing factor 19                                                                         | protein_coding | 28000  | -   |
| ENSMUSG00000<br>024742 | 13.45   | 0.164 | -2.612 | 0.000106296 | 0.000687307 | Fen1     | flap structure specific endonuclease 1                                                                | protein_coding | 14156  | -   |
| ENSMUSG00000<br>024793 | 15.04   | 0.165 | -2.601 | 0.000174653 | 0.001021263 | Tnfrsf25 | tumor necrosis factor receptor superfamily, member 25                                                 | protein_coding | 85030  | -   |
| ENSMUSG00000<br>024798 | 10.79   | 4.102 | 2.036  | 0.002722046 | 0.009492034 | Htr7     | 5-hydroxytryptamine (serotonin) receptor 7                                                            | protein_coding | 15566  | -   |

|                        |        |        |        |             |             |          |                                                                                |                |        |          |
|------------------------|--------|--------|--------|-------------|-------------|----------|--------------------------------------------------------------------------------|----------------|--------|----------|
| ENSMUSG00000<br>024831 | 12.76  | 0.188  | -2.409 | 7.94684E-05 | 0.000541307 | Ighmbp2  | immunoglobulin mu binding protein 2                                            | protein_coding | 20589  | -        |
| ENSMUSG00000<br>024854 | 85.43  | 0.181  | -2.469 | 7.18461E-12 | 7.59413E-10 | Pold4    | polymerase (DNA-directed), delta 4                                             | protein_coding | 69745  | -        |
| ENSMUSG00000<br>024869 | 13.52  | 0.211  | -2.247 | 0.001328991 | 0.005320998 | Nudt8    | -                                                                              | protein_coding | -      | -        |
| ENSMUSG00000<br>024875 | 13.51  | 0.184  | -2.439 | 0.000664301 | 0.003016635 | Yif1a    | Yip1 interacting factor homolog A (S. cerevisiae)                              | protein_coding | 68090  | -        |
| ENSMUSG00000<br>024889 | 12.32  | 0.082  | -3.61  | 6.60092E-07 | 1.07927E-05 | Rce1     | Ras converting CAAX endopeptidase 1                                            | protein_coding | 19671  | -        |
| ENSMUSG00000<br>024897 | 39.64  | 4.181  | 2.064  | 4.7395E-05  | 0.000358284 | Apba1    | amyloid beta (A4) precursor protein binding, family A, member 1                | protein_coding | 319924 | -        |
| ENSMUSG00000<br>024906 | 13.03  | 0.231  | -2.116 | 0.000555263 | 0.002605776 | Mus81    | MUS81 structure-specific endonuclease subunit                                  | protein_coding | 71711  | -        |
| ENSMUSG00000<br>024909 | 7.06   | 4.949  | 2.307  | 0.00898927  | 0.024892616 | Efemp2   | epidermal growth factor-containing fibulin-like extracellular matrix protein 2 | protein_coding | 58859  | -        |
| ENSMUSG00000<br>024910 | 32.95  | 0.121  | -3.049 | 1.32169E-10 | 8.92835E-09 | Ctsw     | cathepsin W                                                                    | protein_coding | 13041  | -        |
| ENSMUSG00000<br>024911 | 21.24  | 0.246  | -2.023 | 0.00011369  | 0.000721869 | Fibp     | fibroblast growth factor (acidic) intracellular binding protein                | protein_coding | 58249  | -        |
| ENSMUSG00000<br>024924 | 5.01   | 5.627  | 2.492  | 0.004909596 | 0.015316065 | Vldlr    | very low density lipoprotein receptor                                          | protein_coding | 22359  | -        |
| ENSMUSG00000<br>024987 | 5.85   | 10.174 | 3.347  | 1.90251E-05 | 0.00017076  | Cyp26a1  | cytochrome P450, family 26, subfamily a, polypeptide 1                         | protein_coding | 13082  | -        |
| ENSMUSG00000<br>025020 | 22.88  | 4.584  | 2.197  | 4.40913E-06 | 5.13798E-05 | Slit1    | slit guidance ligand 1                                                         | protein_coding | 20562  | -        |
| ENSMUSG00000<br>025038 | 13.04  | 4.906  | 2.294  | 0.000978549 | 0.004147062 | Efhc2    | EF-hand domain (C-terminal) containing 2                                       | protein_coding | 74405  | -        |
| ENSMUSG00000<br>025064 | 11.29  | 5.811  | 2.539  | 9.57277E-06 | 9.62581E-05 | Col17a1  | collagen, type XVII, alpha 1                                                   | protein_coding | 12821  | -        |
| ENSMUSG00000<br>025083 | 12.92  | 4.41   | 2.141  | 0.001022269 | 0.004297091 | Afax12   | actin filament associated protein 1-like 2                                     | protein_coding | 226250 | -        |
| ENSMUSG00000<br>025085 | 275.76 | 0.249  | -2.005 | 4.68342E-09 | 1.87849E-07 | Ablim1   | actin-binding LIM protein 1                                                    | protein_coding | 226251 | -        |
| ENSMUSG00000<br>025145 | 12.27  | 0.222  | -2.173 | 0.00162361  | 0.006264688 | Lrrc45   | leucine rich repeat containing 45                                              | protein_coding | 217366 | -        |
| ENSMUSG00000<br>025155 | 22.56  | 0.234  | -2.093 | 1.08919E-05 | 0.000107242 | Dus11    | dihydrouridine synthase 1-like (S. cerevisiae)                                 | protein_coding | 68730  | -        |
| ENSMUSG00000<br>025170 | 4.27   | 4.794  | 2.261  | 0.011340639 | 0.029994105 | Rab40b   | Rab40B, member RAS oncogene family                                             | protein_coding | 217371 | -        |
| ENSMUSG00000<br>025178 | 35.28  | 0.236  | -2.085 | 3.90755E-08 | 1.03562E-06 | Pi4k2a   | phosphatidylinositol 4-kinase type 2 alpha                                     | protein_coding | 84095  | -        |
| ENSMUSG00000<br>025212 | 29.75  | 0.225  | -2.149 | 3.22161E-05 | 0.000261587 | Sfxn3    | sideroflexin 3                                                                 | protein_coding | 94280  | -        |
| ENSMUSG00000<br>025216 | 3.95   | 4.973  | 2.314  | 0.019533756 | 0.046182516 | Lbx1     | ladybird homeobox 1                                                            | protein_coding | 16814  | Homeobox |
| ENSMUSG00000<br>025260 | 31.6   | 0.196  | -2.352 | 2.10156E-08 | 6.2729E-07  | Hsd17b10 | hydroxysteroid (17-beta) dehydrogenase 10                                      | protein_coding | 15108  | -        |



|                        |        |       |        |             |             |         |                                                                             |                |        |   |
|------------------------|--------|-------|--------|-------------|-------------|---------|-----------------------------------------------------------------------------|----------------|--------|---|
| ENSMUSG00000<br>025264 | 6.66   | 0.17  | -2.553 | 0.00202479  | 0.007490932 | Tsr2    | TSR2 20S rRNA accumulation                                                  | protein_coding | 69499  | - |
| ENSMUSG00000<br>025265 | 7.44   | 4.164 | 2.058  | 0.011344612 | 0.029995781 | Fgd1    | FYVE, RhoGEF and PH domain containing 1                                     | protein_coding | 14163  | - |
| ENSMUSG00000<br>025357 | 229.72 | 0.199 | -2.33  | 1.0672E-12  | 1.58484E-10 | Dgka    | diacylglycerol kinase, alpha                                                | protein_coding | 13139  | - |
| ENSMUSG00000<br>025366 | 136.19 | 0.171 | -2.547 | 4.1789E-13  | 6.76493E-11 | Esyt1   | extended synaptotagmin-like protein 1                                       | protein_coding | 23943  | - |
| ENSMUSG00000<br>025381 | 16     | 0.2   | -2.318 | 0.000164593 | 0.000975129 | Cnpy2   | canopy FGF signaling regulator 2                                            | protein_coding | 56530  | - |
| ENSMUSG00000<br>025420 | 7.82   | 4.819 | 2.269  | 0.000821091 | 0.0035942   | Katnal2 | katanin p60 subunit A-like 2                                                | protein_coding | 71206  | - |
| ENSMUSG00000<br>025491 | 489.57 | 7.061 | 2.82   | 1.09482E-07 | 2.39913E-06 | Ifitm1  | interferon induced transmembrane protein 1                                  | protein_coding | 68713  | - |
| ENSMUSG00000<br>025555 | 40.87  | 4.117 | 2.042  | 2.16786E-07 | 4.28254E-06 | Farp1   | FERM, RhoGEF (Arhgef) and pleckstrin domain protein 1 (chondrocyte-derived) | protein_coding | 223254 | - |
| ENSMUSG00000<br>025576 | 65.56  | 4.287 | 2.1    | 1.25236E-07 | 2.68219E-06 | Rbfox3  | RNA binding protein, fox-1 homolog (C. elegans) 3                           | protein_coding | 52897  | - |
| ENSMUSG00000<br>025607 | 220.65 | 5.69  | 2.508  | 1.04358E-14 | 2.64113E-12 | Copg2   | coatamer protein complex, subunit gamma 2                                   | protein_coding | 54160  | - |
| ENSMUSG00000<br>025626 | 22.68  | 0.234 | -2.098 | 0.000138581 | 0.000851157 | Phf6    | PHD finger protein 6                                                        | protein_coding | 70998  | - |
| ENSMUSG00000<br>025645 | 8.7    | 0.204 | -2.29  | 0.008808034 | 0.02449645  | Ccdc51  | coiled-coil domain containing 51                                            | protein_coding | 66658  | - |
| ENSMUSG00000<br>025650 | 6.06   | 4.137 | 2.049  | 0.005809979 | 0.017587518 | Col7a1  | collagen, type VII, alpha 1                                                 | protein_coding | 12836  | - |
| ENSMUSG00000<br>025658 | 14.81  | 4.621 | 2.208  | 0.000523344 | 0.002488481 | Cnksr2  | connector enhancer of kinase suppressor of Ras 2                            | protein_coding | 245684 | - |
| ENSMUSG00000<br>025722 | 21.18  | 0.21  | -2.251 | 6.98034E-05 | 0.000488243 | Wdr73   | WD repeat domain 73                                                         | protein_coding | 71968  | - |
| ENSMUSG00000<br>025738 | 5.37   | 4.524 | 2.178  | 0.011747778 | 0.030809284 | Fbxl16  | F-box and leucine-rich repeat protein 16                                    | protein_coding | 214931 | - |
| ENSMUSG00000<br>025779 | 5.53   | 5.794 | 2.535  | 0.001578443 | 0.006125926 | Ly96    | lymphocyte antigen 96                                                       | protein_coding | 17087  | - |
| ENSMUSG00000<br>025794 | 518.38 | 0.181 | -2.465 | 2.60402E-09 | 1.16688E-07 | Rpl14   | ribosomal protein L14                                                       | protein_coding | 67115  | - |
| ENSMUSG00000<br>025813 | 14.29  | 4.158 | 2.056  | 0.000136635 | 0.000841974 | Homer2  | homer scaffolding protein 2                                                 | protein_coding | 26557  | - |
| ENSMUSG00000<br>025856 | 57     | 4.801 | 2.263  | 3.08682E-08 | 8.50722E-07 | Pdgfa   | platelet derived growth factor, alpha                                       | protein_coding | 18590  | - |
| ENSMUSG00000<br>025869 | 8.69   | 0.116 | -3.114 | 0.000200782 | 0.001144987 | Nop16   | NOP16 nucleolar protein                                                     | protein_coding | 28126  | - |
| ENSMUSG00000<br>025872 | 19.37  | 0.208 | -2.263 | 9.81709E-05 | 0.000643808 | Thoc3   | THO complex 3                                                               | protein_coding | 73666  | - |
| ENSMUSG00000<br>025876 | 15.4   | 6.08  | 2.604  | 0.000378443 | 0.001910179 | Unc5a   | unc-5 netrin receptor A                                                     | protein_coding | 107448 | - |
| ENSMUSG00000<br>025892 | 27.16  | 5.11  | 2.353  | 2.58031E-08 | 7.38304E-07 | Gria4   | glutamate receptor, ionotropic, AMPA4 (alpha 4)                             | protein_coding | 14802  | - |

|                    |        |        |        |             |             |               |                                                                                    |                |        |      |
|--------------------|--------|--------|--------|-------------|-------------|---------------|------------------------------------------------------------------------------------|----------------|--------|------|
| ENSMUSG00000025899 | 9.29   | 0.149  | -2.749 | 0.000364783 | 0.001850065 | Alkbh8        | alkB homolog 8, tRNA methyltransferase                                             | protein_coding | 67667  | -    |
| ENSMUSG00000025900 | 27.37  | 6.386  | 2.675  | 6.30056E-08 | 1.52375E-06 | Rp1           | retinitis pigmentosa 1 (human)                                                     | protein_coding | 19888  | -    |
| ENSMUSG00000025902 | 3.32   | 7.191  | 2.846  | 0.006541262 | 0.019309994 | Sox17         | SRY (sex determining region Y)-box 17                                              | protein_coding | 20671  | HMG  |
| ENSMUSG00000025946 | 9.95   | 8.763  | 3.131  | 2.40906E-05 | 0.00020643  | Pth2r         | parathyroid hormone 2 receptor                                                     | protein_coding | 213527 | -    |
| ENSMUSG00000025962 | 8.57   | 0.199  | -2.326 | 0.003255463 | 0.010983367 | Fastkd2       | FAST kinase domains 2                                                              | protein_coding | 75619  | -    |
| ENSMUSG00000025968 | 29.31  | 0.214  | -2.224 | 3.94749E-06 | 4.70999E-05 | Ndufs1        | NADH:ubiquinone oxidoreductase core subunit S1                                     | protein_coding | 227197 | -    |
| ENSMUSG00000026012 | 50.16  | 0.177  | -2.502 | 1.74818E-11 | 1.65201E-09 | Cd28          | CD28 antigen                                                                       | protein_coding | 12487  | -    |
| ENSMUSG00000026023 | 10.18  | 4.433  | 2.148  | 0.005427129 | 0.016601987 | Cdk15         | cyclin-dependent kinase 15                                                         | protein_coding | 271697 | -    |
| ENSMUSG00000026062 | 14.48  | 4.057  | 2.02   | 0.000606748 | 0.00280418  | Slc9a2        | solute carrier family 9 (sodium/hydrogen exchanger), member 2                      | protein_coding | 226999 | -    |
| ENSMUSG00000026073 | 88.19  | 4.855  | 2.28   | 2.42301E-06 | 3.13908E-05 | Il1r2         | interleukin 1 receptor, type II                                                    | protein_coding | 16178  | -    |
| ENSMUSG00000026077 | 18.42  | 6.772  | 2.76   | 1.4502E-08  | 4.62596E-07 | Npas2         | neuronal PAS domain protein 2                                                      | protein_coding | 18143  | bHLH |
| ENSMUSG00000026078 | 17.3   | 0.192  | -2.379 | 1.03504E-05 | 0.000102529 | Pdcl3         | phosducin-like 3                                                                   | protein_coding | 68833  | -    |
| ENSMUSG00000026090 | 13.61  | 4.555  | 2.187  | 0.001688693 | 0.00646739  | 2010300C02Rik | RIKEN cDNA 2010300C02 gene                                                         | protein_coding | 72097  | -    |
| ENSMUSG00000026147 | 7.47   | 4.014  | 2.005  | 0.009559713 | 0.026153851 | Col9a1        | collagen, type IX, alpha 1                                                         | protein_coding | 12839  | -    |
| ENSMUSG00000026149 | 6.66   | 8.058  | 3.01   | 3.75457E-05 | 0.000295255 | Tm4sf20       | transmembrane 4 L six family member 20                                             | protein_coding | 66261  | -    |
| ENSMUSG00000026180 | 623.59 | 4.252  | 2.088  | 7.15588E-09 | 2.62416E-07 | Cxcr2         | chemokine (C-X-C motif) receptor 2                                                 | protein_coding | 12765  | -    |
| ENSMUSG00000026181 | 101.62 | 0.056  | -4.163 | 1.53553E-06 | 2.15394E-05 | Ppm1f         | protein phosphatase 1F (PP2C domain containing)                                    | protein_coding | 68606  | -    |
| ENSMUSG00000026192 | 162.15 | 8.056  | 3.01   | 0.006372942 | 0.018928165 | Atic          | 5-aminoimidazole-4-carboxamide ribonucleotide formyltransferase/IMP cyclohydrolase | protein_coding | 108147 | -    |
| ENSMUSG00000026204 | 51.13  | 5.905  | 2.562  | 1.38661E-07 | 2.93821E-06 | Ptpn          | protein tyrosine phosphatase, receptor type, N                                     | protein_coding | 19275  | -    |
| ENSMUSG00000026207 | 18.54  | 5.407  | 2.435  | 2.52595E-06 | 3.24437E-05 | Speg          | SPEG complex locus                                                                 | protein_coding | 11790  | -    |
| ENSMUSG00000026227 | 5.91   | 15.507 | 3.955  | 9.7655E-06  | 9.78674E-05 | 2810459M11Rik | RIKEN cDNA 2810459M11 gene                                                         | protein_coding | 72792  | -    |
| ENSMUSG00000026234 | 133.56 | 0.22   | -2.185 | 5.32765E-09 | 2.07663E-07 | Ncl           | nucleolin                                                                          | protein_coding | 17975  | -    |
| ENSMUSG00000026238 | 548.77 | 0.214  | -2.221 | 6.78667E-10 | 3.70214E-08 | Ptma          | prothymosin alpha                                                                  | protein_coding | 19231  | -    |

|                        |         |        |        |             |             |           |                                                                         |                |        |          |
|------------------------|---------|--------|--------|-------------|-------------|-----------|-------------------------------------------------------------------------|----------------|--------|----------|
| ENSMUSG00000<br>026247 | 6.34    | 9.732  | 3.283  | 3.61378E-05 | 0.000287328 | Ecel1     | endothelin converting enzyme-like 1                                     | protein_coding | 13599  | -        |
| ENSMUSG00000<br>026248 | 10.04   | 0.006  | -7.315 | 1.30172E-08 | 4.26057E-07 | Mrpl44    | mitochondrial ribosomal protein L44                                     | protein_coding | 69163  | -        |
| ENSMUSG00000<br>026255 | 6.43    | 14.004 | 3.808  | 5.92926E-06 | 6.51538E-05 | Efhd1     | EF hand domain containing 1                                             | protein_coding | 98363  | -        |
| ENSMUSG00000<br>026270 | 11.49   | 0.089  | -3.497 | 1.61939E-06 | 2.25397E-05 | Capn10    | calpain 10                                                              | protein_coding | 23830  | -        |
| ENSMUSG00000<br>026303 | 5.18    | 4.047  | 2.017  | 0.009289165 | 0.025557648 | Mlph      | melanophilin                                                            | protein_coding | 171531 | -        |
| ENSMUSG00000<br>026321 | 7.34    | 5.277  | 2.4    | 0.015372229 | 0.038057809 | Tnfrsf11a | tumor necrosis factor receptor superfamily, member 11a, NFKB activator  | protein_coding | 21934  | -        |
| ENSMUSG00000<br>026344 | 7.02    | 5.144  | 2.363  | 0.001280301 | 0.005165186 | Lypd1     | Ly6/Plaur domain containing 1                                           | protein_coding | 72585  | -        |
| ENSMUSG00000<br>026357 | 1532.44 | 7.869  | 2.976  | 6.64E-11    | 5.12078E-09 | Rgs18     | regulator of G-protein signaling 18                                     | protein_coding | 64214  | -        |
| ENSMUSG00000<br>026377 | 19.2    | 0.121  | -3.045 | 5.20208E-09 | 2.04436E-07 | Nifk      | nucleolar protein interacting with the FHA domain of MKI67              | protein_coding | 67949  | -        |
| ENSMUSG00000<br>026387 | 7.2     | 4.367  | 2.127  | 0.006834944 | 0.019976759 | Sctr      | secretin receptor                                                       | protein_coding | 319229 | -        |
| ENSMUSG00000<br>026399 | 90.35   | 0.124  | -3.011 | 5.32927E-16 | 1.65106E-13 | Cd55      | CD55 molecule, decay accelerating factor for complement                 | protein_coding | 13136  | -        |
| ENSMUSG00000<br>026407 | 10.15   | 4.47   | 2.16   | 0.004016965 | 0.013014938 | Cacna1s   | calcium channel, voltage-dependent, L type, alpha 1S subunit            | protein_coding | 12292  | -        |
| ENSMUSG00000<br>026442 | 26.71   | 4.822  | 2.27   | 6.90148E-07 | 1.11522E-05 | Nfasc     | neurofascin                                                             | protein_coding | 269116 | -        |
| ENSMUSG00000<br>026447 | 284.34  | 4.141  | 2.05   | 8.2455E-08  | 1.89467E-06 | Pik3c2b   | phosphatidylinositol-4-phosphate 3-kinase catalytic subunit type 2 beta | protein_coding | 240752 | -        |
| ENSMUSG00000<br>026468 | 11.52   | 4.059  | 2.021  | 0.006381121 | 0.018933681 | Lhx4      | LIM homeobox protein 4                                                  | protein_coding | 16872  | Homeobox |
| ENSMUSG00000<br>026479 | 6.05    | 5.539  | 2.47   | 0.001256159 | 0.005086058 | Lamc2     | laminin, gamma 2                                                        | protein_coding | 16782  | -        |
| ENSMUSG00000<br>026494 | 41.03   | 4.62   | 2.208  | 3.65836E-07 | 6.61338E-06 | Kif26b    | kinesin family member 26B                                               | protein_coding | 269152 | -        |
| ENSMUSG00000<br>026496 | 55.51   | 0.169  | -2.568 | 2.17369E-08 | 6.41364E-07 | Parp1     | poly (ADP-ribose) polymerase family, member 1                           | protein_coding | 11545  | -        |
| ENSMUSG00000<br>026504 | 764.86  | 4.894  | 2.291  | 1.05856E-06 | 1.58248E-05 | Sdccag8   | serologically defined colon cancer antigen 8                            | protein_coding | 76816  | -        |
| ENSMUSG00000<br>026520 | 18.28   | 0.172  | -2.537 | 3.59601E-07 | 6.52693E-06 | Pycr2     | pyrroline-5-carboxylate reductase family, member 2                      | protein_coding | 69051  | -        |
| ENSMUSG00000<br>026523 | 10.84   | 4.18   | 2.063  | 0.001587744 | 0.006154051 | Wdr64     | WD repeat domain 64                                                     | protein_coding | 75820  | -        |
| ENSMUSG00000<br>026527 | 26.68   | 5.187  | 2.375  | 8.62049E-08 | 1.97076E-06 | Rgs7      | regulator of G protein signaling 7                                      | protein_coding | 24012  | -        |
| ENSMUSG00000<br>026535 | 28.87   | 0.166  | -2.592 | 0.001375584 | 0.005472187 | Ifi202b   | interferon activated gene 202B                                          | protein_coding | 26388  | -        |
| ENSMUSG00000<br>026536 | 35.98   | 0.236  | -2.08  | 1.31582E-06 | 1.89151E-05 | Ifi211    | interferon activated gene 211                                           | protein_coding | 381308 | -        |

|                        |        |       |        |             |             |        |                                                              |                |        |          |
|------------------------|--------|-------|--------|-------------|-------------|--------|--------------------------------------------------------------|----------------|--------|----------|
| ENSMUSG00000<br>026579 | 116.72 | 4.337 | 2.117  | 1.57695E-09 | 7.70005E-08 | F5     | coagulation factor V                                         | protein_coding | 14067  | -        |
| ENSMUSG00000<br>026586 | 5.03   | 4.004 | 2.002  | 0.007312874 | 0.021099073 | Prrx1  | paired related homeobox 1                                    | protein_coding | 18933  | Homeobox |
| ENSMUSG00000<br>026608 | 15.81  | 0.183 | -2.45  | 8.25888E-05 | 0.000558539 | Kctd3  | potassium 44aladin44izationrisation domain containing 3      | protein_coding | 226823 | -        |
| ENSMUSG00000<br>026609 | 63.15  | 4.333 | 2.116  | 2.91502E-10 | 1.71229E-08 | Ush2a  | usherin                                                      | protein_coding | 22283  | -        |
| ENSMUSG00000<br>026610 | 61.79  | 4.402 | 2.138  | 4.35977E-07 | 7.70312E-06 | Esrg   | estrogen-related receptor gamma                              | protein_coding | 26381  | ESR-like |
| ENSMUSG00000<br>026616 | 31.23  | 0.115 | -3.116 | 4.92447E-12 | 5.53049E-10 | Cr2    | complement receptor 2                                        | protein_coding | 12902  | -        |
| ENSMUSG00000<br>026620 | 11.92  | 4.541 | 2.183  | 0.014957415 | 0.037225732 | Mark1  | MAP/microtubule affinity regulating kinase 1                 | protein_coding | 226778 | -        |
| ENSMUSG00000<br>026640 | 20.63  | 5.577 | 2.48   | 8.98869E-06 | 9.16153E-05 | Plxna2 | plexin A2                                                    | protein_coding | 18845  | -        |
| ENSMUSG00000<br>026676 | 10.57  | 4.485 | 2.165  | 0.000178747 | 0.001041474 | Ccdc3  | coiled-coil domain containing 3                              | protein_coding | 74186  | -        |
| ENSMUSG00000<br>026686 | 14.26  | 5.251 | 2.393  | 0.001615909 | 0.006238991 | Lmx1a  | LIM homeobox transcription factor 1 alpha                    | protein_coding | 110648 | Homeobox |
| ENSMUSG00000<br>026696 | 31.67  | 0.204 | -2.29  | 6.1282E-08  | 1.4882E-06  | Vamp4  | vesicle-associated membrane protein 4                        | protein_coding | 53330  | -        |
| ENSMUSG00000<br>026701 | 603.92 | 4.162 | 2.057  | 4.57308E-07 | 8.00133E-06 | Prdx6  | peroxiredoxin 6                                              | protein_coding | 11758  | -        |
| ENSMUSG00000<br>026712 | 10.09  | 4.53  | 2.179  | 0.000136251 | 0.000840473 | Mrc1   | mannose receptor, C type 1                                   | protein_coding | 17533  | -        |
| ENSMUSG00000<br>026726 | 16.02  | 5.508 | 2.462  | 0.00014339  | 0.000875792 | Cubn   | cubilin (intrinsic factor-cobalamin receptor)                | protein_coding | 65969  | -        |
| ENSMUSG00000<br>026755 | 97.48  | 0.208 | -2.263 | 7.54771E-08 | 1.76595E-06 | Arpc5l | actin related protein 2/3 complex, subunit 5-like            | protein_coding | 74192  | -        |
| ENSMUSG00000<br>026764 | 26.78  | 4.46  | 2.157  | 1.86545E-05 | 0.000167937 | Kif5c  | kinesin family member 5C                                     | protein_coding | 16574  | -        |
| ENSMUSG00000<br>026805 | 8.4    | 6.188 | 2.629  | 0.002108052 | 0.007749506 | Barhl1 | BarH like homeobox 1                                         | protein_coding | 54422  | Homeobox |
| ENSMUSG00000<br>026815 | 59.1   | 5.045 | 2.335  | 3.606E-05   | 0.000286963 | Gfi1b  | growth factor independent 1B                                 | protein_coding | 14582  | zf-C2H2  |
| ENSMUSG00000<br>026817 | 6.46   | 7.401 | 2.888  | 0.001496417 | 0.005859474 | Ak1    | adenylate kinase 1                                           | protein_coding | 11636  | -        |
| ENSMUSG00000<br>026824 | 7.28   | 5.374 | 2.426  | 0.000132698 | 0.00082194  | Kcnj3  | potassium inwardly-rectifying channel, subfamily J, member 3 | protein_coding | 16519  | -        |
| ENSMUSG00000<br>026836 | 19.09  | 6.115 | 2.612  | 8.5568E-06  | 8.8417E-05  | Acvr1  | activin A receptor, type 1                                   | protein_coding | 11477  | -        |
| ENSMUSG00000<br>026840 | 9.22   | 7.398 | 2.887  | 0.00066322  | 0.003014773 | Lamc3  | laminin gamma 3                                              | protein_coding | 23928  | -        |
| ENSMUSG00000<br>026848 | 31.14  | 0.198 | -2.337 | 2.51876E-07 | 4.85098E-06 | Tor1b  | torsin family 1, member B                                    | protein_coding | 30934  | -        |
| ENSMUSG00000<br>026874 | 9.34   | 7.322 | 2.872  | 0.003316204 | 0.011158964 | Hc     | hemolytic complement                                         | protein_coding | 15139  | -        |

|                    |         |        |        |             |             |                   |                                                                           |                |        |          |
|--------------------|---------|--------|--------|-------------|-------------|-------------------|---------------------------------------------------------------------------|----------------|--------|----------|
| ENSMUSG00000026883 | 36.76   | 4.019  | 2.007  | 1.79825E-07 | 3.64293E-06 | Dab2ip            | disabled 2 interacting protein                                            | protein_coding | 69601  | -        |
| ENSMUSG00000026904 | 27.41   | 4.382  | 2.132  | 3.81195E-06 | 4.57561E-05 | Slc4a10           | solute carrier family 4, sodium bicarbonate cotransporter-like, member 10 | protein_coding | 94229  | -        |
| ENSMUSG00000026919 | 3.51    | 0.163  | -2.619 | 0.006429817 | 0.019037302 | Lcn4              | lipocalin 4                                                               | protein_coding | 16821  | -        |
| ENSMUSG00000026941 | 10.66   | 0.206  | -2.278 | 0.000802183 | 0.00352431  | Mamdc4            | MAM domain containing 4                                                   | protein_coding | 381352 | -        |
| ENSMUSG00000026975 | 12.25   | 0.103  | -3.286 | 4.01078E-07 | 7.16398E-06 | Dph7              | diphthamine biosynthesis 7                                                | protein_coding | 67228  | -        |
| ENSMUSG00000026986 | 15.06   | 8.923  | 3.158  | 5.57954E-07 | 9.39632E-06 | Hnmt              | histamine N-methyltransferase                                             | protein_coding | 140483 | -        |
| ENSMUSG00000026989 | 30.02   | 0.121  | -3.052 | 3.65039E-07 | 6.60562E-06 | Dapl1             | death associated protein-like 1                                           | protein_coding | 76747  | -        |
| ENSMUSG00000027002 | 81.26   | 5.498  | 2.459  | 4.79484E-10 | 2.69246E-08 | Nckap1            | NCK-associated protein 1                                                  | protein_coding | 50884  | -        |
| ENSMUSG00000027048 | 10.12   | 6.156  | 2.622  | 6.26949E-05 | 0.000445811 | Abcb11            | ATP-binding cassette, sub-family B (MDR/TAP), member 11                   | protein_coding | 27413  | -        |
| ENSMUSG00000027067 | 45.45   | 0.092  | -3.443 | 1.02049E-11 | 1.036E-09   | Ssrp1             | structure specific recognition protein 1                                  | protein_coding | 20833  | HMG      |
| ENSMUSG00000027102 | 7.75    | 13.106 | 3.712  | 0.00032886  | 0.001707059 | Hoxd8             | homeobox D8                                                               | protein_coding | 15437  | Homeobox |
| ENSMUSG00000027164 | 25.8    | 0.18   | -2.476 | 2.57043E-05 | 0.000217765 | Traf6             | TNF receptor-associated factor 6                                          | protein_coding | 22034  | -        |
| ENSMUSG00000027165 | 12.91   | 4.039  | 2.014  | 0.000665276 | 0.003018816 | B230118H07<br>Rik | RIKEN cDNA B230118H07 gene                                                | protein_coding | 68170  | -        |
| ENSMUSG00000027168 | 6.12    | 4.102  | 2.036  | 0.002449707 | 0.008725739 | Pax6              | paired box 6                                                              | protein_coding | 18508  | PAX      |
| ENSMUSG00000027170 | 73.63   | 0.091  | -3.465 | 9.82666E-18 | 4.01307E-15 | Eif3m             | eukaryotic translation initiation factor 3, subunit M                     | protein_coding | 98221  | -        |
| ENSMUSG00000027173 | 7.29    | 4.041  | 2.015  | 0.002742474 | 0.009548443 | Depdc7            | DEP domain containing 7                                                   | protein_coding | 211896 | -        |
| ENSMUSG00000027210 | 24.41   | 4.509  | 2.173  | 1.94714E-06 | 2.61908E-05 | Meis2             | Meis homeobox 2                                                           | protein_coding | 17536  | Homeobox |
| ENSMUSG00000027227 | 481.78  | 10.495 | 3.392  | 1.78623E-13 | 3.24209E-11 | Sord              | sorbitol dehydrogenase                                                    | protein_coding | 20322  | -        |
| ENSMUSG00000027238 | 36.95   | 4.048  | 2.017  | 4.06785E-08 | 1.07126E-06 | Frmd5             | FERM domain containing 5                                                  | protein_coding | 228564 | -        |
| ENSMUSG00000027239 | 9.7     | 6.135  | 2.617  | 0.005562955 | 0.016953573 | Mdk               | midkine                                                                   | protein_coding | 17242  | -        |
| ENSMUSG00000027286 | 7.04    | 0.199  | -2.332 | 0.002615579 | 0.009190328 | Lrrc57            | leucine rich repeat containing 57                                         | protein_coding | 66606  | -        |
| ENSMUSG00000027287 | 1085.94 | 4.764  | 2.252  | 1.08665E-06 | 1.61916E-05 | Snap23            | synaptosomal-associated protein 23                                        | protein_coding | 20619  | -        |
| ENSMUSG00000027356 | 5.19    | 4.308  | 2.107  | 0.006294999 | 0.018743138 | Fermt1            | fermitin family member 1                                                  | protein_coding | 241639 | -        |
| ENSMUSG00000027358 | 9.42    | 5.137  | 2.361  | 0.000337576 | 0.001742072 | Bmp2              | bone morphogenetic protein 2                                              | protein_coding | 12156  | -        |

|                        |       |       |        |             |             |         |                                                                                 |                |        |          |
|------------------------|-------|-------|--------|-------------|-------------|---------|---------------------------------------------------------------------------------|----------------|--------|----------|
| ENSMUSG00000<br>027359 | 18.53 | 7.329 | 2.874  | 3.88641E-06 | 4.64945E-05 | Slc27a2 | solute carrier family 27 (fatty acid transporter), member 2                     | protein_coding | 26458  | -        |
| ENSMUSG00000<br>027368 | 42.98 | 0.105 | -3.256 | 3.47397E-14 | 7.61265E-12 | Dusp2   | dual specificity phosphatase 2                                                  | protein_coding | 13537  | -        |
| ENSMUSG00000<br>027378 | 6.58  | 7.619 | 2.93   | 4.87941E-05 | 0.000366088 | Nphp1   | nephronophthisis 1 (juvenile) homolog (human)                                   | protein_coding | 53885  | -        |
| ENSMUSG00000<br>027386 | 5.46  | 6.004 | 2.586  | 0.006399426 | 0.018969198 | Fbln7   | fibulin 7                                                                       | protein_coding | 70370  | -        |
| ENSMUSG00000<br>027406 | 42.97 | 0.095 | -3.395 | 4.47361E-11 | 3.65392E-09 | Idh3b   | isocitrate dehydrogenase 3 (NAD+) beta                                          | protein_coding | 170718 | -        |
| ENSMUSG00000<br>027411 | 41.59 | 0.217 | -2.202 | 4.62969E-07 | 8.09251E-06 | Vps16   | VSP16 CORVET/HOPS core subunit                                                  | protein_coding | 80743  | -        |
| ENSMUSG00000<br>027420 | 9.37  | 4.826 | 2.271  | 0.000943642 | 0.004020122 | Bfsp1   | beaded filament structural protein 1, in lens-CP94                              | protein_coding | 12075  | -        |
| ENSMUSG00000<br>027434 | 5.68  | 4.441 | 2.151  | 0.014907961 | 0.03713866  | Nkx2-2  | NK2 homeobox 2                                                                  | protein_coding | 18088  | Homeobox |
| ENSMUSG00000<br>027452 | 52.6  | 0.213 | -2.234 | 5.8747E-10  | 3.21837E-08 | Acss1   | acyl-CoA synthetase short-chain family member 1                                 | protein_coding | 68738  | -        |
| ENSMUSG00000<br>027488 | 10.24 | 4.577 | 2.194  | 0.00573294  | 0.017389465 | Snta1   | syntrophin, acidic 1                                                            | protein_coding | 20648  | -        |
| ENSMUSG00000<br>027509 | 23.79 | 0.209 | -2.259 | 1.86573E-06 | 2.53213E-05 | Rae1    | ribonucleic acid export 1                                                       | protein_coding | 66679  | -        |
| ENSMUSG00000<br>027520 | 9.39  | 5.234 | 2.388  | 0.002450253 | 0.008725739 | Zdbf2   | zinc finger, DBF-type containing 2                                              | protein_coding | 73884  | -        |
| ENSMUSG00000<br>027582 | 93.33 | 0.248 | -2.014 | 6.5328E-07  | 1.07106E-05 | Zgpat   | zinc finger, CCCH-type with G patch domain                                      | protein_coding | 229007 | -        |
| ENSMUSG00000<br>027583 | 10.77 | 4.327 | 2.113  | 0.004579182 | 0.014429639 | Zbtb46  | zinc finger and BTB domain containing 46                                        | protein_coding | 72147  | ZBTB     |
| ENSMUSG00000<br>027618 | 22.41 | 0.189 | -2.407 | 4.186E-06   | 4.93558E-05 | Nfs1    | nitrogen fixation gene 1 (S. cerevisiae)                                        | protein_coding | 18041  | -        |
| ENSMUSG00000<br>027624 | 24.69 | 5.749 | 2.523  | 2.18188E-06 | 2.8763E-05  | Epb4111 | erythrocyte membrane protein band 4.1 like 1                                    | protein_coding | 13821  | -        |
| ENSMUSG00000<br>027667 | 16.18 | 0.146 | -2.776 | 5.78063E-05 | 0.000418502 | Zfp639  | zinc finger protein 639                                                         | protein_coding | 67778  | zf-C2H2  |
| ENSMUSG00000<br>027673 | 29.31 | 0.244 | -2.035 | 9.64589E-06 | 9.68848E-05 | Ndufb5  | NADH:ubiquinone oxidoreductase subunit B5                                       | protein_coding | 66046  | -        |
| ENSMUSG00000<br>027674 | 18.21 | 4.244 | 2.085  | 0.000460745 | 0.002247321 | Pex5l   | peroxisomal biogenesis factor 5-like                                            | protein_coding | 58869  | -        |
| ENSMUSG00000<br>027716 | 7.95  | 4.14  | 2.05   | 0.013516098 | 0.034348852 | Trpc3   | transient receptor potential cation channel, subfamily C, member 3              | protein_coding | 22065  | -        |
| ENSMUSG00000<br>027737 | 44.46 | 4.475 | 2.162  | 1.09893E-06 | 1.63061E-05 | Slc7a11 | solute carrier family 7 (cationic amino acid transporter, y+ system), member 11 | protein_coding | 26570  | -        |
| ENSMUSG00000<br>027752 | 28.9  | 0.244 | -2.037 | 7.13253E-06 | 7.58369E-05 | Exosc8  | exosome component 8                                                             | protein_coding | 69639  | -        |
| ENSMUSG00000<br>027765 | 74.58 | 6.188 | 2.629  | 3.48824E-10 | 2.00256E-08 | P2ry1   | purinergic receptor P2Y, G-protein coupled 1                                    | protein_coding | 18441  | -        |
| ENSMUSG00000<br>027787 | 14.96 | 0.197 | -2.347 | 2.83388E-05 | 0.00023575  | Nmd3    | NMD3 ribosome export adaptor                                                    | protein_coding | 97112  | -        |

|                    |        |       |        |             |             |         |                                                                   |                |        |          |
|--------------------|--------|-------|--------|-------------|-------------|---------|-------------------------------------------------------------------|----------------|--------|----------|
| ENSMUSG00000027796 | 7.87   | 4.505 | 2.172  | 0.000711054 | 0.003190283 | Smad9   | SMAD family member 9                                              | protein_coding | 55994  | MH1      |
| ENSMUSG00000027797 | 27.62  | 4.197 | 2.069  | 1.46892E-05 | 0.000137833 | Dclk1   | doublecortin-like kinase 1                                        | protein_coding | 13175  | -        |
| ENSMUSG00000027803 | 21.13  | 6.465 | 2.693  | 2.80349E-08 | 7.88305E-07 | Wwtr1   | WW domain containing transcription regulator 1                    | protein_coding | 97064  | -        |
| ENSMUSG00000027809 | 16.76  | 0.193 | -2.374 | 4.17906E-06 | 4.93063E-05 | Etfdh   | electron transferring flavoprotein, dehydrogenase                 | protein_coding | 66841  | -        |
| ENSMUSG00000027855 | 6.26   | 5.564 | 2.476  | 0.000416186 | 0.002065869 | Sycp1   | synaptonemal complex protein 1                                    | protein_coding | 20957  | -        |
| ENSMUSG00000027863 | 157.9  | 0.148 | -2.754 | 5.4452E-15  | 1.46037E-12 | Cd2     | CD2 antigen                                                       | protein_coding | 12481  | -        |
| ENSMUSG00000027868 | 9.89   | 5.349 | 2.419  | 0.000421792 | 0.002090234 | Tbx15   | T-box 15                                                          | protein_coding | 21384  | T-box    |
| ENSMUSG00000027875 | 5.13   | 4.761 | 2.251  | 0.017684589 | 0.0426991   | Hmgcs2  | 3-hydroxy-3-methylglutaryl-Coenzyme A synthase 2                  | protein_coding | 15360  | -        |
| ENSMUSG00000027894 | 10.18  | 9.34  | 3.223  | 0.00084744  | 0.0036874   | Slc6a17 | solute carrier family 6 (neurotransmitter transporter), member 17 | protein_coding | 229706 | -        |
| ENSMUSG00000027953 | 34.45  | 0.117 | -3.094 | 4.31536E-12 | 4.90776E-10 | Slc50a1 | solute carrier family 50 (sugar transporter), member 1            | protein_coding | 19729  | -        |
| ENSMUSG00000027966 | 15.14  | 4.718 | 2.238  | 0.000105772 | 0.000684685 | Coll1a1 | collagen, type XI, alpha 1                                        | protein_coding | 12814  | -        |
| ENSMUSG00000027977 | 22.2   | 4.277 | 2.096  | 1.01229E-05 | 0.000100545 | Ndst3   | N-deacetylase/N-sulfotransferase (heparan glucosaminyl) 3         | protein_coding | 83398  | -        |
| ENSMUSG00000028015 | 36.01  | 0.209 | -2.256 | 1.69197E-08 | 5.24665E-07 | Ctso    | cathepsin O                                                       | protein_coding | 229445 | -        |
| ENSMUSG00000028017 | 11.04  | 4.17  | 2.06   | 0.000759023 | 0.003360986 | Egf     | epidermal growth factor                                           | protein_coding | 13645  | -        |
| ENSMUSG00000028020 | 8.57   | 4.063 | 2.023  | 0.013655998 | 0.034629499 | Glrb    | glycine receptor, beta subunit                                    | protein_coding | 14658  | -        |
| ENSMUSG00000028023 | 5.38   | 4.381 | 2.131  | 0.001893538 | 0.007092971 | Pitx2   | paired-like homeodomain transcription factor 2                    | protein_coding | 18741  | Homeobox |
| ENSMUSG00000028034 | 36.46  | 0.196 | -2.351 | 8.94295E-08 | 2.02899E-06 | Fubp1   | far upstream element (FUSE) binding protein 1                     | protein_coding | 51886  | -        |
| ENSMUSG00000028063 | 130.74 | 4.418 | 2.143  | 1.92876E-06 | 2.60194E-05 | Lmna    | lamin A                                                           | protein_coding | 16905  | -        |
| ENSMUSG00000028071 | 36.6   | 0.209 | -2.256 | 5.87136E-07 | 9.78126E-06 | Sh2d2a  | SH2 domain containing 2A                                          | protein_coding | 27371  | -        |
| ENSMUSG00000028076 | 11.1   | 0.159 | -2.652 | 0.000332358 | 0.001721572 | Cd1d1   | CD1d1 antigen                                                     | protein_coding | 12479  | -        |
| ENSMUSG00000028096 | 11.93  | 0.22  | -2.182 | 0.002862534 | 0.009892016 | Gpr89   | G protein-coupled receptor 89                                     | protein_coding | 67549  | -        |
| ENSMUSG00000028108 | 459.31 | 6.327 | 2.661  | 5.3134E-09  | 2.07558E-07 | Ecm1    | extracellular matrix protein 1                                    | protein_coding | 13601  | -        |
| ENSMUSG00000028114 | 9.81   | 0.135 | -2.891 | 7.06961E-05 | 0.000493144 | Mettl14 | methyltransferase like 14                                         | protein_coding | 210529 | -        |
| ENSMUSG00000028132 | 17.36  | 5.428 | 2.44   | 0.000177827 | 0.001037123 | Tmem56  | transmembrane protein 56                                          | protein_coding | 99887  | -        |

|                        |         |       |        |             |             |          |                                                             |                |        |          |
|------------------------|---------|-------|--------|-------------|-------------|----------|-------------------------------------------------------------|----------------|--------|----------|
| ENSMUSG00000<br>028140 | 28.99   | 0.122 | -3.031 | 2.93376E-11 | 2.51032E-09 | Mrp19    | mitochondrial ribosomal protein L9                          | protein_coding | 78523  | -        |
| ENSMUSG00000<br>028182 | 7.91    | 5.159 | 2.367  | 0.001665358 | 0.006396926 | Lrriq3   | leucine-rich repeats and IQ motif containing 3              | protein_coding | 74435  | -        |
| ENSMUSG00000<br>028184 | 22.24   | 4.286 | 2.1    | 7.98637E-05 | 0.000543382 | Adgrl2   | adhesion G protein-coupled receptor L2                      | protein_coding | 99633  | -        |
| ENSMUSG00000<br>028185 | 4.53    | 4.121 | 2.043  | 0.011670485 | 0.03065891  | Dnase2b  | deoxyribonuclease II beta                                   | protein_coding | 56629  | -        |
| ENSMUSG00000<br>028214 | 3.76    | 0.149 | -2.746 | 0.003534138 | 0.011729762 | Gem      | GTP binding protein (gene overexpressed in skeletal muscle) | protein_coding | 14579  | -        |
| ENSMUSG00000<br>028217 | 5.89    | 5.108 | 2.353  | 0.003138    | 0.010659827 | Cdh17    | cadherin 17                                                 | protein_coding | 12557  | -        |
| ENSMUSG00000<br>028234 | 1057.94 | 0.228 | -2.131 | 1.60853E-08 | 5.01831E-07 | Rps20    | ribosomal protein S20                                       | protein_coding | 67427  | -        |
| ENSMUSG00000<br>028246 | 9.45    | 4.497 | 2.169  | 0.000451086 | 0.002211612 | Faxc     | failed axon connections homolog                             | protein_coding | 76132  | -        |
| ENSMUSG00000<br>028261 | 5.99    | 0.242 | -2.047 | 0.005276876 | 0.016241895 | Ndufaf4  | NADH:ubiquinone oxidoreductase complex assembly factor 4    | protein_coding | 68493  | -        |
| ENSMUSG00000<br>028327 | 4.24    | 4.342 | 2.118  | 0.019423698 | 0.046002957 | Stra6l   | STRA6-like                                                  | protein_coding | 74152  | -        |
| ENSMUSG00000<br>028358 | 19.17   | 4.548 | 2.185  | 0.000933064 | 0.003982477 | Zfp618   | zinc finger protein 618                                     | protein_coding | 72701  | zf-C2H2  |
| ENSMUSG00000<br>028364 | 9.94    | 4.069 | 2.025  | 0.007863489 | 0.022360979 | Tnc      | tenascin C                                                  | protein_coding | 21923  | -        |
| ENSMUSG00000<br>028389 | 6.79    | 4.678 | 2.226  | 0.018559852 | 0.044425467 | Zfp37    | zinc finger protein 37                                      | protein_coding | 22696  | zf-C2H2  |
| ENSMUSG00000<br>028412 | 348.13  | 5.316 | 2.41   | 4.73449E-09 | 1.88634E-07 | Slc44a1  | solute carrier family 44, member 1                          | protein_coding | 100434 | -        |
| ENSMUSG00000<br>028423 | 50.16   | 0.203 | -2.301 | 1.01051E-09 | 5.17318E-08 | Nfx1     | nuclear transcription factor, X-box binding 1               | protein_coding | 74164  | zf-NF-X1 |
| ENSMUSG00000<br>028434 | 17.05   | 4.026 | 2.009  | 0.000255885 | 0.001391644 | Epb4114b | erythrocyte membrane protein band 4.1 like 4b               | protein_coding | 54357  | -        |
| ENSMUSG00000<br>028444 | 14.62   | 6.749 | 2.755  | 7.7405E-06  | 8.11488E-05 | Cntfr    | ciliary neurotrophic factor receptor                        | protein_coding | 12804  | -        |
| ENSMUSG00000<br>028454 | 18.47   | 0.234 | -2.094 | 2.25788E-05 | 0.000195527 | Pigo     | phosphatidylinositol glycan anchor biosynthesis, class O    | protein_coding | 56703  | -        |
| ENSMUSG00000<br>028459 | 77.93   | 0.13  | -2.938 | 9.95419E-11 | 7.15467E-09 | Cd72     | CD72 antigen                                                | protein_coding | 12517  | -        |
| ENSMUSG00000<br>028460 | 15.26   | 0.248 | -2.011 | 0.000908054 | 0.003895158 | Sit1     | suppression inducing transmembrane adaptor 1                | protein_coding | 54390  | -        |
| ENSMUSG00000<br>028461 | 13.24   | 0.185 | -2.437 | 1.9775E-05  | 0.000176259 | Ccdc107  | coiled-coil domain containing 107                           | protein_coding | 622404 | -        |
| ENSMUSG00000<br>028495 | 1093.68 | 0.244 | -2.036 | 7.35365E-08 | 1.73103E-06 | Rps6     | ribosomal protein S6                                        | protein_coding | 20104  | -        |
| ENSMUSG00000<br>028497 | 701     | 5.015 | 2.326  | 1.08712E-07 | 2.39486E-06 | Hacd4    | 3-hydroxyacyl-CoA dehydratase 4                             | protein_coding | 66775  | -        |
| ENSMUSG00000<br>028518 | 19.49   | 7.366 | 2.881  | 2.38905E-08 | 6.93518E-07 | Prkaa2   | protein kinase, AMP-activated, alpha 2 catalytic subunit    | protein_coding | 108079 | -        |



|                        |         |       |        |             |             |          |                                                                                                 |                |        |          |
|------------------------|---------|-------|--------|-------------|-------------|----------|-------------------------------------------------------------------------------------------------|----------------|--------|----------|
| ENSMUSG00000<br>028527 | 9.46    | 5.632 | 2.494  | 0.000116971 | 0.000739048 | Ak4      | adenylate kinase 4                                                                              | protein_coding | 11639  | -        |
| ENSMUSG00000<br>028546 | 18.35   | 4.831 | 2.272  | 0.000203365 | 0.00115678  | Elavl4   | ELAV like RNA binding protein 4                                                                 | protein_coding | 15572  | -        |
| ENSMUSG00000<br>028560 | 28.67   | 0.176 | -2.505 | 4.48464E-07 | 7.89578E-06 | Usp1     | ubiquitin specific peptidase 1                                                                  | protein_coding | 230484 | -        |
| ENSMUSG00000<br>028571 | 6.68    | 4.473 | 2.161  | 0.011618377 | 0.030557759 | Cyp2j13  | cytochrome P450, family 2,<br>subfamily j, polypeptide 13                                       | protein_coding | 230459 | -        |
| ENSMUSG00000<br>028573 | 29.85   | 4.246 | 2.086  | 1.73878E-07 | 3.54242E-06 | Fggy     | FGY carbohydrate kinase domain<br>containing                                                    | protein_coding | 75578  | -        |
| ENSMUSG00000<br>028609 | 27.85   | 0.206 | -2.282 | 1.86485E-07 | 3.76935E-06 | Magoh    | mago homolog, exon junction<br>complex core component                                           | protein_coding | 17149  | -        |
| ENSMUSG00000<br>028629 | 14.3    | 0.145 | -2.791 | 6.02838E-05 | 0.000432259 | Exo5     | exonuclease 5                                                                                   | protein_coding | 73172  | -        |
| ENSMUSG00000<br>028649 | 427.48  | 0.219 | -2.193 | 5.09678E-09 | 2.00842E-07 | Macf1    | microtubule-actin crosslinking factor<br>1                                                      | protein_coding | 11426  | -        |
| ENSMUSG00000<br>028651 | 21.32   | 0.235 | -2.089 | 7.41448E-05 | 0.000511836 | Ppie     | peptidylprolyl isomerase E<br>(cyclophilin E)                                                   | protein_coding | 56031  | -        |
| ENSMUSG00000<br>028661 | 11.13   | 5.58  | 2.48   | 0.000161664 | 0.000961584 | Epha8    | Eph receptor A8                                                                                 | protein_coding | 13842  | -        |
| ENSMUSG00000<br>028664 | 92.65   | 4.267 | 2.093  | 9.20772E-06 | 9.33037E-05 | Ephb2    | Eph receptor B2                                                                                 | protein_coding | 13844  | -        |
| ENSMUSG00000<br>028707 | 6.55    | 9.411 | 3.234  | 0.000591414 | 0.002750288 | Dmbx1    | diencephalon/mesencephalon<br>homeobox 1                                                        | protein_coding | 140477 | Homeobox |
| ENSMUSG00000<br>028716 | 201.45  | 4.727 | 2.241  | 9.23852E-07 | 1.42101E-05 | Pdzklip1 | PDZK1 interacting protein 1                                                                     | protein_coding | 67182  | -        |
| ENSMUSG00000<br>028717 | 163.02  | 5.369 | 2.425  | 1.4908E-10  | 9.88496E-09 | Tal1     | T cell acute lymphocytic leukemia 1                                                             | protein_coding | 21349  | bHLH     |
| ENSMUSG00000<br>028736 | 12.4    | 4     | 2      | 0.003637457 | 0.012028241 | Pax7     | paired box 7                                                                                    | protein_coding | 18509  | PAX      |
| ENSMUSG00000<br>028780 | 15.04   | 7.356 | 2.879  | 8.3492E-07  | 1.30345E-05 | Sema3c   | sema domain, immunoglobulin<br>domain (Ig), short basic domain,<br>sec49aladin49izamaphorin) 3C | protein_coding | 20348  | -        |
| ENSMUSG00000<br>028790 | 72.95   | 0.249 | -2.003 | 5.7984E-10  | 3.18629E-08 | Khdrbs1  | KH domain containing, RNA<br>binding, signal transduction<br>associated 1                       | protein_coding | 20218  | -        |
| ENSMUSG00000<br>028798 | 125.03  | 0.249 | -2.008 | 7.21145E-09 | 2.63635E-07 | Eif3i    | eukaryotic translation initiation<br>factor 3, subunit I                                        | protein_coding | 54709  | -        |
| ENSMUSG00000<br>028801 | 15      | 5.345 | 2.418  | 0.000244127 | 0.001341324 | Stpg1    | sperm tail PG rich repeat containing<br>1                                                       | protein_coding | 78806  | -        |
| ENSMUSG00000<br>028833 | 20.53   | 0.239 | -2.064 | 3.06061E-05 | 0.000249983 | Ncdn     | neurochondrin                                                                                   | protein_coding | 26562  | -        |
| ENSMUSG00000<br>028843 | 1441.92 | 3.999 | 2      | 8.82313E-07 | 1.36557E-05 | Sh3bgrl3 | SH3 domain binding glutamic acid-<br>rich protein-like 3                                        | protein_coding | 73723  | -        |
| ENSMUSG00000<br>028847 | 24.31   | 0.218 | -2.197 | 6.20872E-06 | 6.78204E-05 | Trappc3  | trafficking protein particle complex<br>3                                                       | protein_coding | 27096  | -        |
| ENSMUSG00000<br>028871 | 4.43    | 4.649 | 2.217  | 0.003337974 | 0.011202848 | Rspo1    | R-spondin 1                                                                                     | protein_coding | 192199 | -        |

|                        |        |       |        |             |             |         |                                                                                                      |                |        |   |
|------------------------|--------|-------|--------|-------------|-------------|---------|------------------------------------------------------------------------------------------------------|----------------|--------|---|
| ENSMUSG00000<br>028884 | 11.81  | 0.129 | -2.951 | 1.59497E-05 | 0.000147353 | Rpa2    | replication protein A2                                                                               | protein_coding | 19891  | - |
| ENSMUSG00000<br>028893 | 49.06  | 4.21  | 2.074  | 1.20602E-08 | 4.01314E-07 | Sesn2   | sestrin 2                                                                                            | protein_coding | 230784 | - |
| ENSMUSG00000<br>028936 | 355.72 | 0.157 | -2.675 | 3.4738E-10  | 2.00066E-08 | Rpl22   | ribosomal protein L22                                                                                | protein_coding | 19934  | - |
| ENSMUSG00000<br>028958 | 14.41  | 0.141 | -2.829 | 2.67147E-06 | 3.39729E-05 | Tmub1   | transmembrane and ubiquitin-like domain containing 1                                                 | protein_coding | 64295  | - |
| ENSMUSG00000<br>028978 | 3.86   | 8.401 | 3.071  | 0.003720846 | 0.012231716 | Nos3    | nitric oxide synthase 3, endothelial cell                                                            | protein_coding | 18127  | - |
| ENSMUSG00000<br>029005 | 85.16  | 4.875 | 2.285  | 1.55099E-05 | 0.000143955 | Draxin  | dorsal inhibitory axon guidance protein                                                              | protein_coding | 70433  | - |
| ENSMUSG00000<br>029022 | 19.88  | 0.224 | -2.158 | 6.28652E-05 | 0.000446668 | Miip    | migration and invasion inhibitory protein                                                            | protein_coding | 28010  | - |
| ENSMUSG00000<br>029027 | 16.27  | 0.196 | -2.348 | 4.40026E-05 | 0.000336704 | Dffb    | DNA fragmentation factor, beta subunit                                                               | protein_coding | 13368  | - |
| ENSMUSG00000<br>029084 | 37.03  | 0.093 | -3.432 | 6.90765E-11 | 5.30443E-09 | Cd38    | CD38 antigen                                                                                         | protein_coding | 12494  | - |
| ENSMUSG00000<br>029093 | 49.74  | 4.344 | 2.119  | 2.69155E-06 | 3.41556E-05 | Sorcs2  | sortilin-related VPS10 domain containing receptor 2                                                  | protein_coding | 81840  | - |
| ENSMUSG00000<br>029095 | 18.17  | 4.168 | 2.059  | 0.003427187 | 0.011433926 | Ablim2  | actin-binding LIM protein 2                                                                          | protein_coding | 231148 | - |
| ENSMUSG00000<br>029096 | 6.52   | 9.28  | 3.214  | 0.000975984 | 0.004138146 | Htra3   | HtrA serine peptidase 3                                                                              | protein_coding | 78558  | - |
| ENSMUSG00000<br>029097 | 46.93  | 0.07  | -3.841 | 0.000842587 | 0.003671302 | Trmt44  | tRNA methyltransferase 44                                                                            | protein_coding | 78890  | - |
| ENSMUSG00000<br>029134 | 10.82  | 4.377 | 2.13   | 0.002213626 | 0.008065015 | Plb1    | phospholipase B1                                                                                     | protein_coding | 665270 | - |
| ENSMUSG00000<br>029189 | 12.06  | 4.112 | 2.04   | 0.010370633 | 0.027942705 | Sel113  | sel-1 suppressor of lin-12-like 3 (C. elegans)                                                       | protein_coding | 231238 | - |
| ENSMUSG00000<br>029204 | 86.46  | 0.209 | -2.262 | 2.49432E-08 | 7.16147E-07 | Rhoh    | ras homolog family member H                                                                          | protein_coding | 74734  | - |
| ENSMUSG00000<br>029207 | 35.35  | 4.473 | 2.161  | 1.95969E-06 | 2.62985E-05 | Apbb2   | amyloid beta (A4) precursor protein-binding, family B, member 2                                      | protein_coding | 11787  | - |
| ENSMUSG00000<br>029211 | 6.27   | 5.184 | 2.374  | 0.001635142 | 0.006301065 | Gabra4  | gamma-aminobutyric acid (GABA) A receptor, subunit alpha 4                                           | protein_coding | 14397  | - |
| ENSMUSG00000<br>029247 | 26.67  | 0.179 | -2.483 | 4.75006E-08 | 1.20556E-06 | Paics   | phosphoribosylaminoimidazole carboxylase, phosphoribosylaminoimidazole succinocarboxamide synthetase | protein_coding | 67054  | - |
| ENSMUSG00000<br>029267 | 24.09  | 0.208 | -2.269 | 1.6268E-06  | 2.26157E-05 | Mtf2    | metal response element binding transcription factor 2                                                | protein_coding | 17765  | - |
| ENSMUSG00000<br>029309 | 7.69   | 5.567 | 2.477  | 0.000481823 | 0.002328011 | Sparc1l | SPARC-like 1                                                                                         | protein_coding | 13602  | - |
| ENSMUSG00000<br>029330 | 23.06  | 4.584 | 2.197  | 3.84764E-06 | 4.611E-05   | Cds1    | CDP-diacylglycerol synthase 1                                                                        | protein_coding | 74596  | - |
| ENSMUSG00000<br>029334 | 15.7   | 5.011 | 2.325  | 0.000183174 | 0.001063474 | Prkg2   | protein kinase, cGMP-dependent, type II                                                              | protein_coding | 19092  | - |

|                    |         |       |        |             |             |               |                                                                  |                      |        |         |
|--------------------|---------|-------|--------|-------------|-------------|---------------|------------------------------------------------------------------|----------------------|--------|---------|
| ENSMUSG00000029360 | 7.99    | 0.218 | -2.194 | 0.002946069 | 0.01012197  | Gm9754        | -                                                                | antisense_RNA        | -      | -       |
| ENSMUSG00000029361 | 35.94   | 4.736 | 2.244  | 2.12589E-06 | 2.8109E-05  | Nos1          | nitric oxide synthase 1, neuronal                                | protein_coding       | 18125  | -       |
| ENSMUSG00000029372 | 3832.88 | 4.516 | 2.175  | 9.88537E-06 | 9.86814E-05 | Pbbp          | pro-platelet basic protein                                       | protein_coding       | 57349  | -       |
| ENSMUSG00000029373 | 2716.89 | 4.927 | 2.301  | 2.99801E-06 | 3.73847E-05 | Pf4           | platelet factor 4                                                | protein_coding       | 56744  | -       |
| ENSMUSG00000029376 | 17.63   | 4.897 | 2.292  | 0.000113157 | 0.000719959 | Mthfd2l       | methylenetetrahydrofolate dehydrogenase (NADP+ dependent) 2-like | protein_coding       | 665563 | -       |
| ENSMUSG00000029420 | 27.89   | 5.982 | 2.581  | 2.8861E-05  | 0.000239098 | Rimbp2        | RIMS binding protein 2                                           | protein_coding       | 231760 | -       |
| ENSMUSG00000029447 | 40.93   | 0.229 | -2.126 | 1.45809E-07 | 3.06796E-06 | Cct6a         | chaperonin containing Tcp1, subunit 6a (zeta)                    | processed_transcript | 12466  | -       |
| ENSMUSG00000029469 | 12.1    | 7.083 | 2.824  | 4.76319E-06 | 5.469E-05   | Ift81         | intraflagellar transport 81                                      | protein_coding       | 12589  | -       |
| ENSMUSG00000029484 | 8.15    | 5.614 | 2.489  | 0.001067858 | 0.004449987 | Anxa3         | annexin A3                                                       | protein_coding       | 11745  | -       |
| ENSMUSG00000029521 | 18.55   | 4.343 | 2.119  | 0.000146021 | 0.000888239 | Chek2         | checkpoint kinase 2                                              | protein_coding       | 50883  | -       |
| ENSMUSG00000029534 | 112.98  | 4.01  | 2.004  | 1.25138E-09 | 6.24612E-08 | St7           | suppression of tumorigenicity 7                                  | protein_coding       | 64213  | -       |
| ENSMUSG00000029535 | 117.48  | 4.676 | 2.225  | 3.59647E-09 | 1.49595E-07 | Triap1        | TP53 regulated inhibitor of apoptosis 1                          | protein_coding       | 69076  | -       |
| ENSMUSG00000029559 | 11.4    | 0.136 | -2.883 | 1.67239E-05 | 0.000153244 | 2210016L21Rik | RIKEN cDNA 2210016L21 gene                                       | protein_coding       | 72357  | -       |
| ENSMUSG00000029560 | 72.04   | 0.23  | -2.122 | 2.55065E-11 | 2.23574E-09 | Snx8          | sorting nexin 8                                                  | protein_coding       | 231834 | -       |
| ENSMUSG00000029564 | 39.16   | 4.432 | 2.148  | 6.96567E-08 | 1.66003E-06 | 4930519G04Rik | RIKEN cDNA 4930519G04 gene                                       | protein_coding       | 67593  | -       |
| ENSMUSG00000029581 | 8.98    | 7.119 | 2.832  | 0.000267667 | 0.001442193 | Fscn1         | fascin actin-bundling protein 1                                  | protein_coding       | 14086  | -       |
| ENSMUSG00000029587 | 23.86   | 0.192 | -2.378 | 1.2553E-07  | 2.68302E-06 | Zfp12         | zinc finger protein 12                                           | protein_coding       | 231866 | zf-C2H2 |
| ENSMUSG00000029608 | 11.29   | 6.2   | 2.632  | 7.2576E-05  | 0.000502573 | Rph3a         | rabphilin 3A                                                     | protein_coding       | 19894  | -       |
| ENSMUSG00000029614 | 919.74  | 0.228 | -2.13  | 1.4712E-08  | 4.67068E-07 | Rpl6          | ribosomal protein L6                                             | protein_coding       | 19988  | -       |
| ENSMUSG00000029648 | 25.52   | 5.083 | 2.346  | 0.000106472 | 0.000688198 | Flt1          | FMS-like tyrosine kinase 1                                       | protein_coding       | 14254  | -       |
| ENSMUSG00000029710 | 5.29    | 4.763 | 2.252  | 0.011808057 | 0.03093439  | Ephb4         | Eph receptor B4                                                  | protein_coding       | 13846  | -       |
| ENSMUSG00000029752 | 10.79   | 4.219 | 2.077  | 0.010407019 | 0.028011809 | Asns          | asparagine synthetase                                            | protein_coding       | 27053  | -       |
| ENSMUSG00000029761 | 168.61  | 4.571 | 2.193  | 3.05894E-09 | 1.3213E-07  | Cald1         | caldesmon 1                                                      | protein_coding       | 109624 | -       |
| ENSMUSG00000029778 | 9.81    | 5.313 | 2.41   | 0.001391586 | 0.005519789 | Adcyap1r1     | adenylate cyclase activating polypeptide 1 receptor 1            | protein_coding       | 11517  | -       |

|                        |         |       |        |             |             |          |                                                                                               |                |        |   |
|------------------------|---------|-------|--------|-------------|-------------|----------|-----------------------------------------------------------------------------------------------|----------------|--------|---|
| ENSMUSG00000<br>029782 | 13.54   | 0.193 | -2.371 | 0.000135089 | 0.000834734 | Tmem209  | transmembrane protein 209                                                                     | protein_coding | 72649  | - |
| ENSMUSG00000<br>029797 | 9.17    | 6.802 | 2.766  | 0.00016481  | 0.000976095 | Sspo     | SCO-spondin                                                                                   | protein_coding | 243369 | - |
| ENSMUSG00000<br>029802 | 28.69   | 4.046 | 2.016  | 1.11291E-06 | 1.64727E-05 | Abcg2    | ATP binding cassette subfamily G member 2 (Junior blood group)                                | protein_coding | 26357  | - |
| ENSMUSG00000<br>029810 | 10.68   | 0.192 | -2.378 | 0.008499147 | 0.023799464 | Tmem176b | transmembrane protein 176B                                                                    | protein_coding | 65963  | - |
| ENSMUSG00000<br>029836 | 40.76   | 0.218 | -2.196 | 5.78086E-07 | 9.6752E-06  | Cbx3     | chromobox 3                                                                                   | protein_coding | 12417  | - |
| ENSMUSG00000<br>029838 | 9.43    | 7.846 | 2.972  | 0.00029951  | 0.001579639 | Ptn      | pleiotrophin                                                                                  | protein_coding | 19242  | - |
| ENSMUSG00000<br>029843 | 6.49    | 6.221 | 2.637  | 0.001079126 | 0.004486537 | Slc13a4  | solute carrier family 13 (sodium/sulfate symporters), member 4                                | protein_coding | 243755 | - |
| ENSMUSG00000<br>029847 | 7.11    | 5.936 | 2.569  | 0.003528361 | 0.01171708  | Slc23a4  | solute carrier family 23 member 4                                                             | protein_coding | 243753 | - |
| ENSMUSG00000<br>029860 | 1984.09 | 4.028 | 2.01   | 1.74036E-05 | 0.000158583 | Zyx      | zyxin                                                                                         | protein_coding | 22793  | - |
| ENSMUSG00000<br>029869 | 9.58    | 0.241 | -2.05  | 0.002253903 | 0.008172619 | Ephb6    | Eph receptor B6                                                                               | protein_coding | 13848  | - |
| ENSMUSG00000<br>029911 | 20.64   | 0.18  | -2.476 | 1.87437E-06 | 2.54002E-05 | Ssbp1    | single-stranded DNA binding protein 1                                                         | protein_coding | 381760 | - |
| ENSMUSG00000<br>029923 | 14.85   | 0.223 | -2.167 | 0.000113355 | 0.000720303 | Rab19    | RAB19, member RAS oncogene family                                                             | protein_coding | 19331  | - |
| ENSMUSG00000<br>029925 | 240     | 4.32  | 2.111  | 1.69003E-08 | 5.24665E-07 | Tbxas1   | thromboxane A synthase 1, platelet                                                            | protein_coding | 21391  | - |
| ENSMUSG00000<br>030022 | 18.83   | 7.576 | 2.922  | 1.3442E-06  | 1.92769E-05 | Adams9   | a disintegrin-like and metallopeptidase (reprolysin type) with thrombospondin type 1 motif, 9 | protein_coding | 101401 | - |
| ENSMUSG00000<br>030043 | 14.88   | 6.987 | 2.805  | 2.19574E-05 | 0.000191539 | Tacr1    | tachykinin receptor 1                                                                         | protein_coding | 21336  | - |
| ENSMUSG00000<br>030056 | 35.19   | 0.197 | -2.344 | 4.88508E-08 | 1.23287E-06 | Isy1     | ISY1 splicing factor homolog                                                                  | protein_coding | 57905  | - |
| ENSMUSG00000<br>030062 | 52.98   | 0.227 | -2.142 | 1.93399E-08 | 5.85048E-07 | Rpn1     | ribophorin I                                                                                  | protein_coding | 103963 | - |
| ENSMUSG00000<br>030079 | 16.75   | 0.195 | -2.358 | 5.86431E-06 | 6.46477E-05 | Ruvb1l   | RuvB-like protein 1                                                                           | protein_coding | 56505  | - |
| ENSMUSG00000<br>030098 | 12.37   | 4.426 | 2.146  | 0.000220995 | 0.001237474 | Grip2    | glutamate receptor interacting protein 2                                                      | protein_coding | 243547 | - |
| ENSMUSG00000<br>030116 | 4.64    | 4.953 | 2.308  | 0.013072078 | 0.033441369 | Mfap5    | microfibrillar associated protein 5                                                           | protein_coding | 50530  | - |
| ENSMUSG00000<br>030131 | 8.63    | 8.374 | 3.066  | 0.000181268 | 0.001054452 | Mug2     | murinoglobulin 2                                                                              | protein_coding | 17837  | - |
| ENSMUSG00000<br>030134 | 13.76   | 4.217 | 2.076  | 0.00258853  | 0.009114892 | Rasgef1a | RasGEF domain family, member 1A                                                               | protein_coding | 70727  | - |
| ENSMUSG00000<br>030159 | 1180.56 | 4.204 | 2.072  | 2.49529E-06 | 3.20958E-05 | Clec1b   | C-type lectin domain family 1, member b                                                       | protein_coding | 56760  | - |

|                        |         |       |        |             |             |           |                                                                                                |                                            |        |   |
|------------------------|---------|-------|--------|-------------|-------------|-----------|------------------------------------------------------------------------------------------------|--------------------------------------------|--------|---|
| ENSMUSG00000<br>030161 | 206.46  | 4.369 | 2.127  | 1.77533E-09 | 8.55253E-08 | Gabarap11 | gamma-aminobutyric acid (GABA)<br>A receptor-associated protein-like 1                         | protein_coding                             | 57436  | - |
| ENSMUSG00000<br>030178 | 9.68    | 0.13  | -2.944 | 9.04474E-05 | 0.000601721 | Klra13-ps | killer cell lectin-like receptor<br>subfamily A, member 13,<br>pseudogene                      | transcribed_unpr<br>ocessed_pseudog<br>ene | 16631  | - |
| ENSMUSG00000<br>030200 | 6.27    | 8.509 | 3.089  | 0.000169607 | 0.000999566 | Bcl2l14   | BCL2-like 14 (apoptosis facilitator)                                                           | protein_coding                             | 66813  | - |
| ENSMUSG00000<br>030228 | 32.56   | 4.269 | 2.094  | 0.000220791 | 0.001237104 | Pik3c2g   | phosphatidylinositol-4-phosphate 3-<br>kinase catalytic subunit type 2<br>gamma                | protein_coding                             | 18705  | - |
| ENSMUSG00000<br>030243 | 33.25   | 0.243 | -2.039 | 0.000113199 | 0.000719959 | Recql     | RecQ protein-like                                                                              | protein_coding                             | 19691  | - |
| ENSMUSG00000<br>030268 | 8.51    | 4.609 | 2.204  | 0.000829751 | 0.003621519 | Bcat1     | branched chain aminotransferase 1,<br>cytosolic                                                | protein_coding                             | 12035  | - |
| ENSMUSG00000<br>030270 | 6.28    | 6.315 | 2.659  | 0.001886893 | 0.007073979 | Cpne9     | copine family member IX                                                                        | protein_coding                             | 211232 | - |
| ENSMUSG00000<br>030336 | 66.22   | 0.143 | -2.809 | 1.01462E-10 | 7.20621E-09 | Cd27      | CD27 antigen                                                                                   | protein_coding                             | 21940  | - |
| ENSMUSG00000<br>030340 | 45.65   | 4.266 | 2.093  | 7.48438E-09 | 2.72241E-07 | Scnn1a    | sodium channel, nonvoltage-gated 1<br>alpha                                                    | protein_coding                             | 20276  | - |
| ENSMUSG00000<br>030342 | 3926.14 | 5.447 | 2.445  | 2.83947E-07 | 5.38779E-06 | Cd9       | CD9 antigen                                                                                    | protein_coding                             | 12527  | - |
| ENSMUSG00000<br>030352 | 175.08  | 4.37  | 2.128  | 2.33562E-08 | 6.80208E-07 | Tspan9    | tetraspanin 9                                                                                  | protein_coding                             | 109246 | - |
| ENSMUSG00000<br>030365 | 39.09   | 0.192 | -2.384 | 5.87594E-07 | 9.78126E-06 | Clec2i    | C-type lectin domain family 2,<br>member i                                                     | protein_coding                             | 93675  | - |
| ENSMUSG00000<br>030376 | 9.46    | 4.653 | 2.218  | 0.00089892  | 0.003866132 | Slc8a2    | solute carrier family 8<br>(sodium/calcium exchanger),<br>member 2                             | protein_coding                             | 110891 | - |
| ENSMUSG00000<br>030401 | 7.67    | 4.401 | 2.138  | 0.011269667 | 0.029850332 | Rtn2      | reticulon 2 (Z-band associated<br>protein)                                                     | protein_coding                             | 20167  | - |
| ENSMUSG00000<br>030411 | 6.28    | 4.03  | 2.011  | 0.013051468 | 0.033407668 | Nova2     | neuro-oncological ventral antigen 2                                                            | protein_coding                             | 384569 | - |
| ENSMUSG00000<br>030468 | 79.76   | 0.15  | -2.741 | 1.24056E-10 | 8.50826E-09 | Siglecg   | sialic acid binding Ig-like lectin G                                                           | protein_coding                             | 243958 | - |
| ENSMUSG00000<br>030491 | 9.82    | 5.297 | 2.405  | 0.000551057 | 0.002591455 | Tdrd12    | tudor domain containing 12                                                                     | protein_coding                             | 71981  | - |
| ENSMUSG00000<br>030500 | 4.78    | 7.939 | 2.989  | 0.005872286 | 0.017734303 | Slc17a6   | solute carrier family 17 (sodium-<br>dependent inorganic phosphate<br>cotransporter), member 6 | protein_coding                             | 140919 | - |
| ENSMUSG00000<br>030549 | 5.11    | 7.204 | 2.849  | 0.000752474 | 0.003335275 | Rhcg      | Rhesus blood group-associated C<br>glycoprotein                                                | protein_coding                             | 56315  | - |
| ENSMUSG00000<br>030553 | 9.12    | 0.219 | -2.192 | 0.01125687  | 0.029820831 | Pgpep11   | pyroglutamyl-peptidase 1-like                                                                  | protein_coding                             | 78444  | - |
| ENSMUSG00000<br>030560 | 68.4    | 0.133 | -2.911 | 1.30808E-11 | 1.27054E-09 | Ctsc      | cathepsin C                                                                                    | protein_coding                             | 13032  | - |
| ENSMUSG00000<br>030577 | 138.83  | 0.047 | -4.419 | 1.70256E-15 | 4.93439E-13 | Cd22      | CD22 antigen                                                                                   | protein_coding                             | 12483  | - |

|                    |         |       |        |             |             |               |                                                                       |                |        |         |
|--------------------|---------|-------|--------|-------------|-------------|---------------|-----------------------------------------------------------------------|----------------|--------|---------|
| ENSMUSG00000030609 | 96.22   | 4.831 | 2.272  | 2.19398E-09 | 1.01086E-07 | Aen           | apoptosis enhancing nuclease                                          | protein_coding | 68048  | -       |
| ENSMUSG00000030647 | 18.97   | 0.123 | -3.018 | 1.03018E-07 | 2.29669E-06 | Ndufc2        | NADH:ubiquinone oxidoreductase subunit C2                             | protein_coding | 68197  | -       |
| ENSMUSG00000030650 | 11.98   | 4.366 | 2.126  | 0.000132281 | 0.000819924 | Tmc5          | transmembrane channel-like gene family 5                              | protein_coding | 74424  | -       |
| ENSMUSG00000030651 | 15.6    | 0.24  | -2.058 | 0.000592912 | 0.002754406 | Art2b         | ADP-ribosyltransferase 2b                                             | protein_coding | 11872  | -       |
| ENSMUSG00000030724 | 128.63  | 0.009 | -6.751 | 4.672E-41   | 2.79837E-37 | Cd19          | CD19 antigen                                                          | protein_coding | 12478  | -       |
| ENSMUSG00000030727 | 37.5    | 0.17  | -2.558 | 2.62236E-10 | 1.58125E-08 | Rabep2        | rabaptin, RAB GTPase binding effector protein 2                       | protein_coding | 70314  | -       |
| ENSMUSG00000030729 | 162.4   | 4.225 | 2.079  | 1.04063E-09 | 5.31225E-08 | Pgm2l1        | phosphoglucomutase 2-like 1                                           | protein_coding | 70974  | -       |
| ENSMUSG00000030738 | 66      | 0.205 | -2.285 | 3.27053E-08 | 8.93132E-07 | Eif3c         | eukaryotic translation initiation factor 3, subunit C                 | protein_coding | 56347  | -       |
| ENSMUSG00000030744 | 1900.88 | 0.205 | -2.288 | 1.0989E-08  | 3.71866E-07 | Rps3          | ribosomal protein S3                                                  | protein_coding | 27050  | -       |
| ENSMUSG00000030769 | 8.8     | 4.713 | 2.237  | 0.002504071 | 0.008885227 | Slc5a11       | solute carrier family 5 (sodium/glucose cotransporter), member 11     | protein_coding | 233836 | -       |
| ENSMUSG00000030793 | 60.95   | 0.2   | -2.321 | 3.25746E-11 | 2.74804E-09 | Pycard        | PYD and CARD domain containing                                        | protein_coding | 66824  | -       |
| ENSMUSG00000030823 | 9.61    | 0.237 | -2.079 | 0.001953993 | 0.007270925 | 9130019O22Rik | RIKEN cDNA 9130019O22 gene                                            | protein_coding | 78921  | zf-C2H2 |
| ENSMUSG00000030825 | 30.4    | 7.93  | 2.987  | 5.22006E-07 | 8.92476E-06 | Hsd17b14      | hydroxysteroid (17-beta) dehydrogenase 14                             | protein_coding | 66065  | -       |
| ENSMUSG00000030838 | 7.51    | 4.327 | 2.113  | 0.007738861 | 0.022065945 | Ush1c         | USH1 protein network component harmonin                               | protein_coding | 72088  | -       |
| ENSMUSG00000030870 | 22.95   | 0.219 | -2.19  | 5.97048E-05 | 0.000428791 | Ubfd1         | ubiquitin family domain containing 1                                  | protein_coding | 28018  | -       |
| ENSMUSG00000030871 | 11.69   | 0.18  | -2.47  | 0.00027497  | 0.00147271  | Ears2         | glutamyl-tRNA synthetase 2, mitochondrial                             | protein_coding | 67417  | -       |
| ENSMUSG00000030872 | 43.63   | 0.115 | -3.119 | 1.14693E-12 | 1.64873E-10 | Gga2          | golgi associated, gamma adaptin ear containing, ARF binding protein 2 | protein_coding | 74105  | -       |
| ENSMUSG00000030880 | 16.09   | 0.146 | -2.773 | 6.72382E-07 | 1.09044E-05 | Polr3e        | polymerase (RNA) III (DNA directed) polypeptide E                     | protein_coding | 26939  | -       |
| ENSMUSG00000030882 | 48.28   | 5.757 | 2.525  | 8.69509E-06 | 8.93833E-05 | Dnhd1         | dynein heavy chain domain 1                                           | protein_coding | 77505  | -       |
| ENSMUSG00000030983 | 36.57   | 0.122 | -3.04  | 2.13136E-11 | 1.94408E-09 | Bccip         | BRCA2 and CDKN1A interacting protein                                  | protein_coding | 66165  | -       |
| ENSMUSG00000030994 | 12.44   | 6.124 | 2.614  | 7.43276E-05 | 0.000512703 | D7Ert443e     | DNA segment, Chr 7, ERATO Doi 443, expressed                          | protein_coding | 71007  | -       |
| ENSMUSG00000031015 | 91.3    | 0.238 | -2.069 | 1.30555E-08 | 4.26534E-07 | Swap70        | SWA-70 protein                                                        | protein_coding | 20947  | -       |
| ENSMUSG00000031029 | 246.81  | 0.205 | -2.285 | 1.21872E-12 | 1.68456E-10 | Eif3f         | eukaryotic translation initiation factor 3, subunit F                 | protein_coding | 66085  | -       |
| ENSMUSG00000031078 | 34.87   | 5.786 | 2.533  | 3.33432E-08 | 9.0632E-07  | Ctnn          | cortactin                                                             | protein_coding | 13043  | -       |

|                    |        |        |        |             |             |               |                                                                                                   |                                |        |   |
|--------------------|--------|--------|--------|-------------|-------------|---------------|---------------------------------------------------------------------------------------------------|--------------------------------|--------|---|
| ENSMUSG00000031099 | 7.55   | 7.853  | 2.973  | 0.000242025 | 0.001331582 | Smarca1       | SWI/SNF related, matrix associated, actin dependent regulator of chromatin, subfamily a, member 1 | protein_coding                 | 93761  | - |
| ENSMUSG00000031132 | 11.02  | 0.121  | -3.041 | 7.93269E-05 | 0.000540753 | Cd40lg        | CD40 ligand                                                                                       | protein_coding                 | 21947  | - |
| ENSMUSG00000031155 | 32.34  | 0.155  | -2.691 | 2.35678E-10 | 1.45031E-08 | Pim2          | proviral integration site 2                                                                       | protein_coding                 | 18715  | - |
| ENSMUSG00000031173 | 6.56   | 7.101  | 2.828  | 0.010034587 | 0.027181707 | Otc           | ornithine transcarbamylase                                                                        | protein_coding                 | 18416  | - |
| ENSMUSG00000031256 | 13.48  | 0.115  | -3.114 | 7.44601E-05 | 0.000513223 | Cstf2         | cleavage stimulation factor, 3' pre-RNA subunit 2                                                 | protein_coding                 | 108062 | - |
| ENSMUSG00000031258 | 11.95  | 0.133  | -2.91  | 0.000170703 | 0.001003834 | Xkrx          | X-linked Kx blood group related, X-linked                                                         | protein_coding                 | 331524 | - |
| ENSMUSG00000031283 | 8.87   | 4.818  | 2.269  | 0.000280537 | 0.001494948 | Chrd1l        | chordin-like 1                                                                                    | protein_coding                 | 83453  | - |
| ENSMUSG00000031284 | 20.86  | 5.426  | 2.44   | 4.2766E-06  | 5.01651E-05 | Pak3          | p21 (RAC1) activated kinase 3                                                                     | protein_coding                 | 18481  | - |
| ENSMUSG00000031285 | 6.86   | 4.534  | 2.181  | 0.016352867 | 0.040006081 | Dcx           | doublecortin                                                                                      | protein_coding                 | 13193  | - |
| ENSMUSG00000031298 | 9.47   | 7.274  | 2.863  | 5.74771E-05 | 0.000416994 | Adgrg2        | adhesion G protein-coupled receptor G2                                                            | protein_coding                 | 237175 | - |
| ENSMUSG00000031302 | 5.54   | 4.271  | 2.094  | 0.01725784  | 0.041844032 | Nlgn3         | neuroligin 3                                                                                      | protein_coding                 | 245537 | - |
| ENSMUSG00000031304 | 117.62 | 0.134  | -2.898 | 2.28781E-13 | 3.95286E-11 | Il2rg         | interleukin 2 receptor, gamma chain                                                               | protein_coding                 | 16186  | - |
| ENSMUSG00000031320 | 898.91 | 0.169  | -2.562 | 2.23792E-11 | 2.02076E-09 | Rps4x         | ribosomal protein S4, X-linked                                                                    | protein_coding                 | 20102  | - |
| ENSMUSG00000031325 | 20.96  | 4.197  | 2.069  | 0.000386215 | 0.00194025  | 4930519F16RIK | RIKEN cDNA 4930519F16 gene                                                                        | transcribed_unitary_pseudogene | 75106  | - |
| ENSMUSG00000031342 | 24.55  | 4.646  | 2.216  | 2.02094E-05 | 0.000179596 | Gpm6b         | glycoprotein m6b                                                                                  | protein_coding                 | 14758  | - |
| ENSMUSG00000031355 | 45.39  | 4.533  | 2.18   | 3.34404E-08 | 9.0632E-07  | Arhgap6       | Rho GTPase activating protein 6                                                                   | protein_coding                 | 11856  | - |
| ENSMUSG00000031362 | 10.36  | 0.126  | -2.984 | 1.73889E-05 | 0.000158529 | Xlr4c         | X-linked lymphocyte-regulated 4C                                                                  | protein_coding                 | 72891  | - |
| ENSMUSG00000031376 | 14.92  | 6.599  | 2.722  | 2.86583E-05 | 0.000237967 | Atp2b3        | ATPase, Ca++ transporting, plasma membrane 3                                                      | protein_coding                 | 320707 | - |
| ENSMUSG00000031377 | 24.31  | 4.538  | 2.182  | 5.67252E-06 | 6.31142E-05 | Bmx           | BMX non-receptor tyrosine kinase                                                                  | protein_coding                 | 12169  | - |
| ENSMUSG00000031379 | 17.74  | 4.553  | 2.187  | 0.000380598 | 0.0019189   | Pir           | pirin                                                                                             | protein_coding                 | 69656  | - |
| ENSMUSG00000031384 | 5.31   | 13.227 | 3.725  | 0.000263581 | 0.001423591 | Asb9          | ankyrin repeat and SOCS box-containing 9                                                          | protein_coding                 | 69299  | - |
| ENSMUSG00000031403 | 25.06  | 0.133  | -2.906 | 1.08666E-08 | 3.69114E-07 | Dkc1          | dyskeratosis congenita 1, dyskerin                                                                | protein_coding                 | 245474 | - |
| ENSMUSG00000031425 | 104.84 | 5.208  | 2.381  | 5.89203E-09 | 2.26711E-07 | Plp1          | proteolipid protein (myelin) 1                                                                    | protein_coding                 | 18823  | - |
| ENSMUSG00000031428 | 8.63   | 0.193  | -2.371 | 0.001321208 | 0.005299281 | Zcchc18       | zinc finger, CCHC domain containing 18                                                            | protein_coding                 | 66995  | - |

|                        |        |       |        |             |             |                   |                                                                       |                      |        |   |
|------------------------|--------|-------|--------|-------------|-------------|-------------------|-----------------------------------------------------------------------|----------------------|--------|---|
| ENSMUSG00000<br>031448 | 5.28   | 5.553 | 2.473  | 0.020336202 | 0.047655348 | Adprh1            | ADP-ribosylhydrolase like 1                                           | protein_coding       | 234072 | - |
| ENSMUSG00000<br>031461 | 10.36  | 4.155 | 2.055  | 0.003287237 | 0.011071858 | Myom2             | myomesin 2                                                            | protein_coding       | 17930  | - |
| ENSMUSG00000<br>031481 | 11.12  | 5.761 | 2.526  | 0.002505782 | 0.008887957 | Tpte              | transmembrane phosphatase with<br>tensin homology                     | protein_coding       | 234129 | - |
| ENSMUSG00000<br>031493 | 7.18   | 4.681 | 2.227  | 0.007444023 | 0.021415571 | Ggn               | gametogenetin                                                         | protein_coding       | 243897 | - |
| ENSMUSG00000<br>031494 | 6.65   | 0.124 | -3.017 | 0.00017217  | 0.00101069  | Cd209a            | CD209a antigen                                                        | protein_coding       | 170786 | - |
| ENSMUSG00000<br>031502 | 11.58  | 5.018 | 2.327  | 0.000160926 | 0.000957508 | Col4a1            | collagen, type IV, alpha 1                                            | protein_coding       | 12826  | - |
| ENSMUSG00000<br>031508 | 93.28  | 0.195 | -2.357 | 1.20023E-11 | 1.17212E-09 | Ankrd10           | ankyrin repeat domain 10                                              | protein_coding       | 102334 | - |
| ENSMUSG00000<br>031548 | 8.1    | 5.359 | 2.422  | 0.000172474 | 0.001011507 | Sfrp1             | secreted frizzled-related protein 1                                   | protein_coding       | 20377  | - |
| ENSMUSG00000<br>031549 | 8.41   | 5.623 | 2.491  | 0.000520423 | 0.002477868 | Ido2              | indoleamine 2,3-dioxygenase 2                                         | protein_coding       | 209176 | - |
| ENSMUSG00000<br>031552 | 7.04   | 8.566 | 3.099  | 0.000957567 | 0.004071584 | Adam18            | a disintegrin and metallopeptidase<br>domain 18                       | protein_coding       | 13524  | - |
| ENSMUSG00000<br>031554 | 5.7    | 4.153 | 2.054  | 0.017447264 | 0.042223555 | Adam5             | a disintegrin and metallopeptidase<br>domain 5                        | protein_coding       | 11499  | - |
| ENSMUSG00000<br>031558 | 27.92  | 5.264 | 2.396  | 1.64188E-05 | 0.000150833 | Slit2             | slit guidance ligand 2                                                | protein_coding       | 20563  | - |
| ENSMUSG00000<br>031559 | 11.95  | 7.926 | 2.987  | 1.0868E-05  | 0.000107124 | 4930555F03R<br>ik | -                                                                     | lincRNA              | -      | - |
| ENSMUSG00000<br>031561 | 82.54  | 4.451 | 2.154  | 1.08169E-08 | 3.68124E-07 | Tenm3             | teneurin transmembrane protein 3                                      | protein_coding       | 23965  | - |
| ENSMUSG00000<br>031576 | 9.56   | 10.92 | 3.449  | 7.26602E-06 | 7.69829E-05 | Kcnu1             | potassium channel, subfamily U,<br>member 1                           | protein_coding       | 16532  | - |
| ENSMUSG00000<br>031577 | 26.52  | 0.22  | -2.187 | 0.000640867 | 0.002929467 | Tti2              | TELO2 interacting protein 2                                           | protein_coding       | 234138 | - |
| ENSMUSG00000<br>031617 | 14.84  | 0.181 | -2.468 | 7.76141E-06 | 8.12731E-05 | Tmem184c          | transmembrane protein 184C                                            | protein_coding       | 234463 | - |
| ENSMUSG00000<br>031626 | 26.42  | 4.236 | 2.083  | 9.96584E-06 | 9.92111E-05 | Sorbs2            | sorbin and SH3 domain containing 2                                    | protein_coding       | 234214 | - |
| ENSMUSG00000<br>031635 | 7.34   | 6.251 | 2.644  | 0.000813235 | 0.003565977 | Anxa10            | annexin A10                                                           | protein_coding       | 26359  | - |
| ENSMUSG00000<br>031647 | 80.18  | 9.543 | 3.254  | 3.78728E-18 | 1.70134E-15 | Mfap3l            | microfibrillar-associated protein 3-<br>like                          | protein_coding       | 71306  | - |
| ENSMUSG00000<br>031659 | 135.05 | 0.243 | -2.04  | 1.09809E-09 | 5.55818E-08 | Adcy7             | adenylate cyclase 7                                                   | protein_coding       | 11513  | - |
| ENSMUSG00000<br>031661 | 16.06  | 6.023 | 2.591  | 0.000234988 | 0.001300029 | Nkd1              | naked cuticle 1                                                       | protein_coding       | 93960  | - |
| ENSMUSG00000<br>031669 | 9.52   | 0.197 | -2.347 | 0.000603379 | 0.0027922   | Gins3             | GINS complex subunit 3 (Psf3<br>homolog)                              | protein_coding       | 78833  | - |
| ENSMUSG00000<br>031736 | 4.69   | 4.413 | 2.142  | 0.017292607 | 0.041905711 | Crnde             | colorectal neoplasia differentially<br>expressed (non-protein coding) | processed_transcript | 71296  | - |



|                        |        |        |        |             |             |                   |                                                                          |                      |        |          |
|------------------------|--------|--------|--------|-------------|-------------|-------------------|--------------------------------------------------------------------------|----------------------|--------|----------|
| ENSMUSG00000<br>031748 | 20.77  | 6.094  | 2.607  | 3.07657E-07 | 5.73628E-06 | Gnao1             | guanine nucleotide binding protein,<br>alpha O                           | protein_coding       | 14681  | -        |
| ENSMUSG00000<br>031750 | 6.36   | 4.254  | 2.089  | 0.018340608 | 0.044012072 | Il34              | interleukin 34                                                           | protein_coding       | 76527  | -        |
| ENSMUSG00000<br>031754 | 42.63  | 0.21   | -2.252 | 1.8574E-09  | 8.92399E-08 | Nudt21            | nudix (nucleoside diphosphate<br>linked moiety X)-type motif 21          | protein_coding       | 68219  | -        |
| ENSMUSG00000<br>031756 | 4.25   | 0.201  | -2.313 | 0.010135462 | 0.027403569 | Cenpn             | centromere protein N                                                     | protein_coding       | 72155  | -        |
| ENSMUSG00000<br>031766 | 8.38   | 4.221  | 2.077  | 0.005185812 | 0.016021984 | Slc12a3           | solute carrier family 12, member 3                                       | protein_coding       | 20497  | -        |
| ENSMUSG00000<br>031785 | 195.49 | 5.806  | 2.538  | 1.37329E-10 | 9.214E-09   | Adgrg1            | adhesion G protein-coupled receptor<br>G1                                | protein_coding       | 14766  | -        |
| ENSMUSG00000<br>031824 | 162.61 | 4.446  | 2.152  | 1.00539E-10 | 7.19364E-09 | 6430548M08<br>Rik | RIKEN cDNA 6430548M08 gene                                               | protein_coding       | 234797 | -        |
| ENSMUSG00000<br>031825 | 43.67  | 11.786 | 3.559  | 1.37296E-09 | 6.79635E-08 | Crispld2          | cysteine-rich secretory protein<br>LCCL domain containing 2              | protein_coding       | 78892  | -        |
| ENSMUSG00000<br>031838 | 102.42 | 0.092  | -3.44  | 1.50207E-15 | 4.42471E-13 | Ifi30             | interferon gamma inducible protein<br>30                                 | processed_transcript | 65972  | -        |
| ENSMUSG00000<br>031840 | 5.52   | 0.15   | -2.736 | 0.001034772 | 0.004341306 | Rab3a             | RAB3A, member RAS oncogene<br>family                                     | protein_coding       | 19339  | -        |
| ENSMUSG00000<br>031848 | 58.94  | 0.122  | -3.033 | 2.83188E-12 | 3.40773E-10 | Lsm4              | LSM4 homolog, U6 small nuclear<br>RNA and mRNA degradation<br>associated | protein_coding       | 50783  | -        |
| ENSMUSG00000<br>031870 | 8.53   | 4.073  | 2.026  | 0.010450024 | 0.02811867  | Pgr               | progesterone receptor                                                    | protein_coding       | 18667  | ESR-like |
| ENSMUSG00000<br>031907 | 8.76   | 0.12   | -3.064 | 2.48058E-05 | 0.000211149 | Zfp90             | zinc finger protein 90                                                   | protein_coding       | 22751  | zf-C2H2  |
| ENSMUSG00000<br>031917 | 16.32  | 0.142  | -2.815 | 9.8512E-07  | 1.49129E-05 | Nip7              | NIP7, nucleolar pre-rRNA<br>processing protein                           | protein_coding       | 66164  | -        |
| ENSMUSG00000<br>031922 | 23.55  | 0.13   | -2.945 | 1.05345E-09 | 5.3473E-08  | Cep57             | centrosomal protein 57                                                   | protein_coding       | 74360  | -        |
| ENSMUSG00000<br>031924 | 51.87  | 0.16   | -2.64  | 4.70154E-09 | 1.88156E-07 | Cyb5b             | cytochrome b5 type B                                                     | protein_coding       | 66427  | -        |
| ENSMUSG00000<br>031931 | 6.64   | 0.24   | -2.058 | 0.018639087 | 0.044567632 | Ankrd49           | ankyrin repeat domain 49                                                 | protein_coding       | 56503  | -        |
| ENSMUSG00000<br>031948 | 34.87  | 0.172  | -2.543 | 1.1128E-07  | 2.43259E-06 | Kars              | lysyl-tRNA synthetase                                                    | protein_coding       | 85305  | -        |
| ENSMUSG00000<br>031955 | 8.27   | 5.769  | 2.528  | 0.000648933 | 0.002959562 | Bcar1             | breast cancer anti-estrogen resistance<br>1                              | protein_coding       | 12927  | -        |
| ENSMUSG00000<br>031963 | 21.77  | 4.977  | 2.315  | 8.14413E-07 | 1.27475E-05 | Bmper             | BMP-binding endothelial regulator                                        | protein_coding       | 73230  | -        |
| ENSMUSG00000<br>031965 | 8.58   | 5.276  | 2.399  | 0.001424844 | 0.005639061 | Tbx20             | T-box 20                                                                 | protein_coding       | 57246  | T-box    |
| ENSMUSG00000<br>031967 | 21.93  | 0.194  | -2.363 | 6.65604E-07 | 1.08237E-05 | Afg31l            | AFG3-like AAA ATPase 1                                                   | protein_coding       | 114896 | -        |
| ENSMUSG00000<br>031997 | 68.47  | 4.539  | 2.183  | 4.37551E-07 | 7.72334E-06 | Trpc6             | transient receptor potential cation<br>channel, subfamily C, member 6    | protein_coding       | 22068  | -        |
| ENSMUSG00000<br>032011 | 197.73 | 0.097  | -3.365 | 1.7917E-15  | 5.11033E-13 | Thy1              | thymus cell antigen 1, theta                                             | protein_coding       | 21838  | -        |

|                        |        |       |        |             |             |          |                                                                                |                |        |          |
|------------------------|--------|-------|--------|-------------|-------------|----------|--------------------------------------------------------------------------------|----------------|--------|----------|
| ENSMUSG00000<br>032017 | 68.04  | 4.175 | 2.062  | 1.64873E-10 | 1.08124E-08 | Grik4    | glutamate receptor, iono58aladin kainate 4                                     | protein_coding | 110637 | -        |
| ENSMUSG00000<br>032033 | 9.18   | 4.922 | 2.299  | 0.001147164 | 0.004719286 | Barx2    | BarH-like homeobox 2                                                           | protein_coding | 12023  | Homeobox |
| ENSMUSG00000<br>032035 | 310.02 | 0.163 | -2.618 | 6.87317E-08 | 1.64016E-06 | Ets1     | E26 avian leukemia oncog'ne 1, 5' domain                                       | protein_coding | 23871  | ETS      |
| ENSMUSG00000<br>032036 | 54.05  | 4.082 | 2.029  | 1.97838E-09 | 9.40463E-08 | Kirrel3  | kirre like nephrin family adhesion molecule 3                                  | protein_coding | 67703  | -        |
| ENSMUSG00000<br>032044 | 16.32  | 0.242 | -2.045 | 0.000121014 | 0.000760582 | Rpsud4   | RNA pseudouridylylate synthase domain containing 4                             | protein_coding | 71989  | -        |
| ENSMUSG00000<br>032053 | 86.54  | 0.047 | -4.4   | 1.30595E-21 | 8.69132E-19 | Pou2af1  | POU domain, class 2, associating factor 1                                      | protein_coding | 18985  | -        |
| ENSMUSG00000<br>032076 | 30.9   | 4.02  | 2.007  | 0.000545124 | 0.002572302 | Cadm1    | cell adhesion molecule 1                                                       | protein_coding | 54725  | -        |
| ENSMUSG00000<br>032094 | 133.74 | 0.218 | -2.195 | 8.76772E-09 | 3.08473E-07 | Cd3d     | CD3 antigen, delta polypeptide                                                 | protein_coding | 12500  | -        |
| ENSMUSG00000<br>032103 | 17.45  | 0.187 | -2.419 | 1.56872E-06 | 2.19364E-05 | Pus3     | pseudouridine synthase 3                                                       | protein_coding | 67049  | -        |
| ENSMUSG00000<br>032105 | 6.92   | 5.165 | 2.369  | 0.000299937 | 0.00158098  | Pdzd3    | PDZ domain containing 3                                                        | protein_coding | 170761 | -        |
| ENSMUSG00000<br>032109 | 92.34  | 4.186 | 2.065  | 1.44281E-08 | 4.61315E-07 | Nlr1     | NLR family member X1                                                           | protein_coding | 270151 | -        |
| ENSMUSG00000<br>032178 | 36.41  | 0.243 | -2.043 | 1.16084E-07 | 2.52226E-06 | Ilf3     | interleukin enhancer binding factor 3                                          | protein_coding | 16201  | -        |
| ENSMUSG00000<br>032192 | 10.47  | 7.879 | 2.978  | 2.84242E-05 | 0.000236242 | Gnb5     | guanine nucleotide binding protein (G protein), beta 5                         | protein_coding | 14697  | -        |
| ENSMUSG00000<br>032215 | 19.1   | 0.18  | -2.47  | 5.78266E-06 | 6.39831E-05 | Rsl24d1  | ribosomal L24 domain containing 1                                              | protein_coding | 225215 | -        |
| ENSMUSG00000<br>032261 | 791.7  | 6.973 | 2.802  | 1.15716E-11 | 1.14879E-09 | Sh3bgrl2 | SH3 domain binding glutamic acid-rich protein like 2                           | protein_coding | 212531 | -        |
| ENSMUSG00000<br>032262 | 5.59   | 6.127 | 2.615  | 0.005995615 | 0.018034015 | Elov14   | elongation of very long chain fatty acids (FEN1/Elo2, SUR4/Elo3, yeast)-like 4 | protein_coding | 83603  | -        |
| ENSMUSG00000<br>032288 | 33.3   | 0.182 | -2.462 | 1.65611E-09 | 8.04287E-08 | Imp3     | IMP3, U3 small nucleolar ribonucleoprotein                                     | protein_coding | 102462 | -        |
| ENSMUSG00000<br>032298 | 7.52   | 0.072 | -3.791 | 7.70078E-06 | 8.08652E-05 | Neil1    | nei endonuclease VIII-like 1 (E. coli)                                         | protein_coding | 72774  | -        |
| ENSMUSG00000<br>032299 | 26.67  | 0.076 | -3.712 | 1.82392E-10 | 1.17425E-08 | Comm4    | COMM domain containing 4                                                       | protein_coding | 66199  | -        |
| ENSMUSG00000<br>032301 | 44.43  | 0.248 | -2.012 | 1.15749E-06 | 1.70484E-05 | Psma4    | proteasome (prosome, macropain) subunit, alpha type 4                          | protein_coding | 26441  | -        |
| ENSMUSG00000<br>032309 | 32.33  | 0.206 | -2.278 | 9.31905E-08 | 2.10554E-06 | Fbxo22   | F-box protein 22                                                               | protein_coding | 71999  | -        |
| ENSMUSG00000<br>032313 | 10.21  | 5.108 | 2.353  | 0.001641409 | 0.00632115  | Tmem266  | transmembrane protein 266                                                      | protein_coding | 244886 | -        |
| ENSMUSG00000<br>032323 | 9.84   | 0.13  | -2.941 | 3.51459E-05 | 0.000281559 | Cyp11a1  | cytochrome P450, family 11, subfamily a, polypeptide 1                         | protein_coding | 13070  | -        |
| ENSMUSG00000<br>032333 | 26.84  | 0.167 | -2.585 | 8.28142E-06 | 8.59669E-05 | Stom1    | stomatin-like 1                                                                | protein_coding | 69106  | -        |

|                        |         |        |        |             |             |                   |                                                                                            |                                    |        |   |
|------------------------|---------|--------|--------|-------------|-------------|-------------------|--------------------------------------------------------------------------------------------|------------------------------------|--------|---|
| ENSMUSG00000<br>032338 | 10.48   | 4.059  | 2.021  | 0.00584167  | 0.017665595 | Hcn4              | hyperpolarization-activated, cyclic nucleotide-gated K+ 4                                  | protein_coding                     | 330953 | - |
| ENSMUSG00000<br>032360 | 6.98    | 7.013  | 2.81   | 0.00090087  | 0.00387359  | Hcrtr2            | hypocretin (orexin) receptor 2                                                             | protein_coding                     | 387285 | - |
| ENSMUSG00000<br>032383 | 157.39  | 0.205  | -2.289 | 2.8829E-11  | 2.49052E-09 | Ppib              | peptidylprolyl isomerase B                                                                 | protein_coding                     | 19035  | - |
| ENSMUSG00000<br>032394 | 7.61    | 4.145  | 2.051  | 0.00350145  | 0.01164924  | Igdc3             | immunoglobulin superfamily, DCC subclass, member 3                                         | protein_coding                     | 19289  | - |
| ENSMUSG00000<br>032397 | 9.15    | 0.185  | -2.436 | 0.000611509 | 0.002824004 | Tipin             | timeless interacting protein                                                               | protein_coding                     | 66131  | - |
| ENSMUSG00000<br>032403 | 9.43    | 0.166  | -2.59  | 0.000186342 | 0.001076996 | 2300009A05R<br>ik | RIKEN cDNA 2300009A05 gene                                                                 | protein_coding                     | 69478  | - |
| ENSMUSG00000<br>032437 | 73.52   | 0.208  | -2.268 | 1.45937E-08 | 4.64131E-07 | Stt3b             | STT3, subunit of the oligosaccharyltransferase complex, homolog B ( <i>S. cerevisiae</i> ) | protein_coding                     | 68292  | - |
| ENSMUSG00000<br>032443 | 13.58   | 4.287  | 2.1    | 0.000467214 | 0.002270248 | Zewpw2            | -                                                                                          | transcribed_unprocessed_pseudogene | -      | - |
| ENSMUSG00000<br>032459 | 9.49    | 0.249  | -2.007 | 0.007745737 | 0.022071543 | Mrps22            | mitochondrial ribosomal protein S22                                                        | protein_coding                     | 64655  | - |
| ENSMUSG00000<br>032492 | 7.88    | 4.544  | 2.184  | 0.012960266 | 0.033250002 | Pth1r             | parathyroid hormone 1 receptor                                                             | protein_coding                     | 19228  | - |
| ENSMUSG00000<br>032502 | 20.28   | 4.698  | 2.232  | 0.000317589 | 0.001655092 | Stac              | src homology three (SH3) and cysteine rich domain                                          | protein_coding                     | 20840  | - |
| ENSMUSG00000<br>032503 | 27.26   | 5.161  | 2.368  | 1.18452E-05 | 0.000115114 | Arpp21            | cyclic AMP-regulated phosphoprotein, 21                                                    | protein_coding                     | 74100  | - |
| ENSMUSG00000<br>032511 | 20.19   | 6.629  | 2.729  | 0.00025013  | 0.001367382 | Scn5a             | sodium channel, voltage-gated, type V, alpha                                               | protein_coding                     | 20271  | - |
| ENSMUSG00000<br>032518 | 2339.78 | 0.158  | -2.659 | 2.84522E-11 | 2.46985E-09 | Rpsa              | ribosomal protein SA                                                                       | protein_coding                     | 16785  | - |
| ENSMUSG00000<br>032528 | 39.49   | 0.184  | -2.442 | 6.04181E-08 | 1.47507E-06 | Vipr1             | vasoactive intestinal peptide receptor 1                                                   | protein_coding                     | 22354  | - |
| ENSMUSG00000<br>032531 | 15.52   | 5.609  | 2.488  | 0.000183016 | 0.001062898 | Amotl2            | angiomin-like 2                                                                            | protein_coding                     | 56332  | - |
| ENSMUSG00000<br>032595 | 12.5    | 4.543  | 2.184  | 0.005394301 | 0.016521254 | Cdhr4             | cadherin-related family member 4                                                           | protein_coding                     | 69398  | - |
| ENSMUSG00000<br>032657 | 57.42   | 0.135  | -2.886 | 2.39313E-14 | 5.5847E-12  | Fam189b           | family with sequence similarity 189, member B                                              | protein_coding                     | 68521  | - |
| ENSMUSG00000<br>032714 | 5.07    | 4.915  | 2.297  | 0.011312799 | 0.029938099 | Syde1             | synapse defective 1, Rho GTPase, homolog 1 ( <i>C. elegans</i> )                           | protein_coding                     | 71709  | - |
| ENSMUSG00000<br>032726 | 12.06   | 10.213 | 3.352  | 3.70222E-05 | 0.000292161 | Bmp8a             | bone morphogenetic protein 8a                                                              | protein_coding                     | 12163  | - |
| ENSMUSG00000<br>032739 | 79.37   | 4.677  | 2.226  | 8.38693E-07 | 1.3082E-05  | Pram1             | PML-RAR alpha-regulated adaptor molecule 1                                                 | protein_coding                     | 378460 | - |
| ENSMUSG00000<br>032763 | 18.31   | 0.25   | -2     | 0.000554942 | 0.002605134 | Ilvbl             | ilvB (bacterial acetolactate synthase)-like                                                | protein_coding                     | 216136 | - |
| ENSMUSG00000<br>032766 | 5366.19 | 4.504  | 2.171  | 1.37222E-05 | 0.000129973 | Gng11             | guanine nucleotide binding protein (G protein), gamma 11                                   | protein_coding                     | 66066  | - |

|                        |       |        |        |             |             |          |                                                                        |                |        |   |
|------------------------|-------|--------|--------|-------------|-------------|----------|------------------------------------------------------------------------|----------------|--------|---|
| ENSMUSG00000<br>032826 | 61.35 | 4.167  | 2.059  | 4.21363E-08 | 1.09658E-06 | Ank2     | ankyrin 2, brain                                                       | protein_coding | 109676 | - |
| ENSMUSG00000<br>032834 | 12.91 | 0.239  | -2.064 | 0.003802942 | 0.012456266 | Pwp2     | PWP2 periodic tryptophan protein homolog (yeast)                       | protein_coding | 110816 | - |
| ENSMUSG00000<br>032839 | 9.74  | 4.471  | 2.161  | 0.003418784 | 0.011413481 | Trpc1    | transient receptor potential cation channel, subfamily C, member 1     | protein_coding | 22063  | - |
| ENSMUSG00000<br>032852 | 5.51  | 11.236 | 3.49   | 0.000100047 | 0.000654203 | Rspo4    | R-spondin 4                                                            | protein_coding | 228770 | - |
| ENSMUSG00000<br>032878 | 8.83  | 6.262  | 2.647  | 0.000486533 | 0.002343843 | Ccdc85a  | coiled-coil domain containing 85A                                      | protein_coding | 216613 | - |
| ENSMUSG00000<br>032936 | 9.32  | 4.18   | 2.064  | 0.001293933 | 0.005207318 | Camkv    | CaM kinase-like vesicle-associated                                     | protein_coding | 235604 | - |
| ENSMUSG00000<br>032959 | 55.51 | 0.158  | -2.658 | 6.07911E-12 | 6.58045E-10 | Pebp1    | phosphatidylethanolamine binding protein 1                             | protein_coding | 23980  | - |
| ENSMUSG00000<br>033047 | 57.01 | 0.247  | -2.016 | 1.26212E-05 | 0.000121213 | Eif3l    | eukaryotic translation initiation factor 3, subunit L                  | protein_coding | 223691 | - |
| ENSMUSG00000<br>033082 | 5.76  | 6.262  | 2.647  | 0.001404292 | 0.005561824 | Clec1a   | C-type lectin domain family 1, member a                                | protein_coding | 243653 | - |
| ENSMUSG00000<br>033105 | 5.15  | 0.168  | -2.57  | 0.00629999  | 0.018754891 | Lss      | lanosterol synthase                                                    | protein_coding | 16987  | - |
| ENSMUSG00000<br>033147 | 43.5  | 4.063  | 2.023  | 8.24346E-09 | 2.92741E-07 | Slc22a15 | solute carrier family 22 (organic anion/cation transporter), member 15 | protein_coding | 242126 | - |
| ENSMUSG00000<br>033170 | 44.28 | 4.822  | 2.27   | 1.60345E-08 | 5.01831E-07 | Card10   | caspase recruitment domain family, member 10                           | protein_coding | 105844 | - |
| ENSMUSG00000<br>033177 | 10.33 | 4.658  | 2.22   | 0.012237052 | 0.03179864  | Tmprss7  | transmembrane serine protease 7                                        | protein_coding | 208171 | - |
| ENSMUSG00000<br>033182 | 10.71 | 4.536  | 2.181  | 0.000947031 | 0.004031557 | Kbtbd12  | kelch repeat and BTB (POZ) domain containing 12                        | protein_coding | 74589  | - |
| ENSMUSG00000<br>033196 | 9.16  | 4.41   | 2.141  | 0.002116676 | 0.007773256 | Myh2     | myosin, heavy polypeptide 2, skeletal muscle, adult                    | protein_coding | 17882  | - |
| ENSMUSG00000<br>033213 | 9.44  | 4.967  | 2.312  | 0.000307066 | 0.001614161 | AA467197 | expressed sequence AA467197                                            | protein_coding | 433470 | - |
| ENSMUSG00000<br>033318 | 11.16 | 0.194  | -2.368 | 0.000119616 | 0.000752581 | Gstt2    | glutathione S-transferase, theta 2                                     | protein_coding | 14872  | - |
| ENSMUSG00000<br>033327 | 11.34 | 4.03   | 2.011  | 0.000531433 | 0.002518278 | Tnxb     | tenascin XB                                                            | protein_coding | 81877  | - |
| ENSMUSG00000<br>033389 | 22.42 | 6.17   | 2.625  | 0.000109524 | 0.000702622 | Arhgap44 | Rho GTPase activating protein 44                                       | protein_coding | 216831 | - |
| ENSMUSG00000<br>033419 | 14.77 | 4.336  | 2.116  | 0.001425358 | 0.005639061 | Snap91   | synaptosomal-associated protein 91                                     | protein_coding | 20616  | - |
| ENSMUSG00000<br>033450 | 93.77 | 0.144  | -2.793 | 8.70086E-11 | 6.43504E-09 | Tagap    | T cell activation Rho GTPase activating protein                        | protein_coding | 72536  | - |
| ENSMUSG00000<br>033460 | 9.06  | 5.562  | 2.476  | 0.007884847 | 0.022411074 | Armcx1   | armadillo repeat containing, X-linked 1                                | protein_coding | 78248  | - |
| ENSMUSG00000<br>033470 | 45.05 | 4.685  | 2.228  | 2.03922E-07 | 4.0669E-06  | Cysltr2  | cysteinyl leukotriene receptor 2                                       | protein_coding | 70086  | - |
| ENSMUSG00000<br>033597 | 7.71  | 7.046  | 2.817  | 0.000137069 | 0.000844358 | Caskin1  | CASK interacting protein 1                                             | protein_coding | 268932 | - |

|                    |        |        |        |             |             |               |                                                                   |                |        |   |
|--------------------|--------|--------|--------|-------------|-------------|---------------|-------------------------------------------------------------------|----------------|--------|---|
| ENSMUSG00000033676 | 34.16  | 4.008  | 2.003  | 1.84205E-06 | 2.51137E-05 | Gabrb3        | gamma-aminobutyric acid (GABA) A receptor, subunit beta 3         | protein_coding | 14402  | - |
| ENSMUSG00000033706 | 8.6    | 0.122  | -3.04  | 0.000199865 | 0.001142097 | Smyd5         | SET and MYND domain containing 5                                  | protein_coding | 232187 | - |
| ENSMUSG00000033717 | 5.47   | 5.141  | 2.362  | 0.001304241 | 0.005242932 | Adra2a        | adrenergic receptor, alpha 2a                                     | protein_coding | 11551  | - |
| ENSMUSG00000033781 | 29.08  | 0.2    | -2.323 | 5.16197E-06 | 5.84839E-05 | Asb13         | ankyrin repeat and SOCS box-containing 13                         | protein_coding | 142688 | - |
| ENSMUSG00000033809 | 7.91   | 0.008  | -6.954 | 2.56617E-07 | 4.92119E-06 | Alg3          | asparagine-linked glycosylation 3 (alpha-1,3-mannosyltransferase) | protein_coding | 208624 | - |
| ENSMUSG00000033813 | 79.63  | 0.211  | -2.242 | 7.83208E-09 | 2.82033E-07 | Tcea1         | transcription elongation factor A (SII) 1                         | protein_coding | 21399  | - |
| ENSMUSG00000033845 | 12.75  | 0.041  | -4.615 | 6.27471E-09 | 2.36583E-07 | Mrp15         | mitochondrial ribosomal protein L15                               | protein_coding | 27395  | - |
| ENSMUSG00000033952 | 6.44   | 8.52   | 3.091  | 0.000848404 | 0.003689489 | Aspm          | abnormal spindle microtubule assembly                             | protein_coding | 12316  | - |
| ENSMUSG00000033960 | 12.15  | 15.256 | 3.931  | 1.22771E-09 | 6.14504E-08 | Jcad          | junctional cadherin 5 associated                                  | protein_coding | 240185 | - |
| ENSMUSG00000033983 | 8.67   | 0.223  | -2.165 | 0.000959445 | 0.004078604 | Coil          | coilin                                                            | protein_coding | 12812  | - |
| ENSMUSG00000033998 | 8.88   | 4.777  | 2.256  | 0.00217005  | 0.007933599 | Kcnk1         | potassium channel, subfamily K, member 1                          | protein_coding | 16525  | - |
| ENSMUSG00000034024 | 90.64  | 0.164  | -2.612 | 5.47673E-14 | 1.15778E-11 | Cct2          | chaperonin containing Tcp1, subunit 2 (beta)                      | protein_coding | 12461  | - |
| ENSMUSG00000034028 | 389.84 | 4.552  | 2.187  | 4.54216E-09 | 1.83E-07    | Cd226         | CD226 antigen                                                     | protein_coding | 225825 | - |
| ENSMUSG00000034032 | 16.21  | 0.242  | -2.047 | 0.000123814 | 0.000774924 | Rpap1         | RNA polymerase II associated protein 1                            | protein_coding | 68925  | - |
| ENSMUSG00000034059 | 19.45  | 4.306  | 2.107  | 0.000235845 | 0.00130437  | Ypel4         | yippee like 4                                                     | protein_coding | 241525 | - |
| ENSMUSG00000034063 | 10     | 4.354  | 2.122  | 0.001522545 | 0.00594623  | 4930590J08Rik | RIKEN cDNA 4930590J08 gene                                        | protein_coding | 381798 | - |
| ENSMUSG00000034171 | 40.08  | 0.242  | -2.047 | 4.84813E-06 | 5.54526E-05 | Faah          | fatty acid amide hydrolase                                        | protein_coding | 14073  | - |
| ENSMUSG00000034201 | 527.66 | 5.012  | 2.325  | 8.77875E-08 | 1.99931E-06 | Gas2l1        | growth arrest-specific 2 like 1                                   | protein_coding | 78926  | - |
| ENSMUSG00000034205 | 12.31  | 4.488  | 2.166  | 5.36385E-05 | 0.000394204 | Loxl2         | lysyl oxidase-like 2                                              | protein_coding | 94352  | - |
| ENSMUSG00000034209 | 22.08  | 5.669  | 2.503  | 9.39514E-06 | 9.47901E-05 | Ras10a        | RAS-like, family 10, member A                                     | protein_coding | 75668  | - |
| ENSMUSG00000034239 | 6.09   | 4.909  | 2.296  | 0.001375157 | 0.0054717   | Gm884         | predicted gene 884                                                | protein_coding | 380730 | - |
| ENSMUSG00000034263 | 16.48  | 0.175  | -2.515 | 4.99256E-05 | 0.000372092 | Ints14        | integrator complex subunit 14                                     | protein_coding | 69882  | - |
| ENSMUSG00000034275 | 8.87   | 5.68   | 2.506  | 2.93337E-05 | 0.000242232 | Igsf9b        | immunoglobulin superfamily, member 9B                             | protein_coding | 235086 | - |
| ENSMUSG00000034285 | 15.6   | 0.184  | -2.441 | 5.7557E-05  | 0.00041737  | Nipsnap1      | nipsnap homolog 1                                                 | protein_coding | 18082  | - |

|                        |        |        |        |             |             |         |                                                                                           |                |        |          |
|------------------------|--------|--------|--------|-------------|-------------|---------|-------------------------------------------------------------------------------------------|----------------|--------|----------|
| ENSMUSG00000<br>034371 | 12.45  | 0.122  | -3.037 | 4.56729E-06 | 5.2868E-05  | Tkfc    | triokinase, FMN cyclase                                                                   | protein_coding | 225913 | -        |
| ENSMUSG00000<br>034379 | 6.3    | 0.086  | -3.545 | 4.73613E-05 | 0.000358255 | Wdr5b   | WD repeat domain 5B                                                                       | protein_coding | 69544  | -        |
| ENSMUSG00000<br>034402 | 24.52  | 4.773  | 2.255  | 4.54039E-06 | 5.26363E-05 | Kcnh5   | potassium voltage-gated channel, subfamily H (eag-related), member 5                      | protein_coding | 238271 | -        |
| ENSMUSG00000<br>034429 | 10.79  | 0.05   | -4.332 | 3.32749E-07 | 6.11367E-06 | Zfp707  | zinc finger protein 707                                                                   | protein_coding | 69020  | zf-C2H2  |
| ENSMUSG00000<br>034460 | 5.24   | 7.865  | 2.976  | 0.002982906 | 0.010220426 | Six4    | sine oculis-related homeobox 4                                                            | protein_coding | 20474  | Homeobox |
| ENSMUSG00000<br>034484 | 126.9  | 0.166  | -2.591 | 5.70384E-12 | 6.26427E-10 | Snx2    | sorting nexin 2                                                                           | protein_coding | 67804  | -        |
| ENSMUSG00000<br>034486 | 7.52   | 7.294  | 2.867  | 6.63797E-05 | 0.000467939 | Gbx2    | gastrulation brain homeobox 2                                                             | protein_coding | 14472  | Homeobox |
| ENSMUSG00000<br>034533 | 17.95  | 5.172  | 2.371  | 0.000211599 | 0.001195291 | Scn10a  | sodium channel, voltage-gated, type X, alpha                                              | protein_coding | 20264  | -        |
| ENSMUSG00000<br>034634 | 209.17 | 0.022  | -5.501 | 1.40075E-36 | 5.03403E-33 | Ly6d    | lymphocyte antigen 6 complex, locus D                                                     | protein_coding | 17068  | -        |
| ENSMUSG00000<br>034645 | 6.28   | 6.945  | 2.796  | 0.000123256 | 0.000772241 | Zyg11a  | zyg-11 family member A, cell cycle regulator                                              | protein_coding | 230590 | -        |
| ENSMUSG00000<br>034659 | 24.2   | 0.223  | -2.162 | 1.62659E-05 | 0.000149811 | Tmem109 | transmembrane protein 109                                                                 | protein_coding | 68539  | -        |
| ENSMUSG00000<br>034664 | 1392.1 | 4.634  | 2.212  | 1.27555E-05 | 0.000122242 | Itga2b  | integrin alpha 2b                                                                         | protein_coding | 16399  | -        |
| ENSMUSG00000<br>034684 | 13.3   | 6.425  | 2.684  | 1.23968E-05 | 0.000119186 | Sema3f  | sema domain, immunoglobulin domain (Ig), short basic domain, sec62aladin62izamaphorin) 3F | protein_coding | 20350  | -        |
| ENSMUSG00000<br>034687 | 38.98  | 4.177  | 2.063  | 2.19583E-05 | 0.000191539 | Fras1   | Fraser extracellular matrix complex subunit 1                                             | protein_coding | 231470 | -        |
| ENSMUSG00000<br>034738 | 6.97   | 4.277  | 2.097  | 0.010709872 | 0.028701817 | Nostrin | nitric oxide synthase trafficker                                                          | protein_coding | 329416 | -        |
| ENSMUSG00000<br>034818 | 7.09   | 4.532  | 2.18   | 0.009313012 | 0.025595826 | Celf5   | CUGBP, Elav-like family member 5                                                          | protein_coding | 319586 | -        |
| ENSMUSG00000<br>034826 | 14.96  | 0.213  | -2.232 | 0.000484829 | 0.00233939  | Nup54   | nucleoporin 54                                                                            | protein_coding | 269113 | -        |
| ENSMUSG00000<br>034833 | 28.81  | 0.164  | -2.612 | 1.22192E-07 | 2.6327E-06  | Tespa1  | thymocyte expressed, positive selection associated 1                                      | protein_coding | 67596  | -        |
| ENSMUSG00000<br>034842 | 15.69  | 6.691  | 2.742  | 1.31226E-06 | 1.8879E-05  | Art3    | ADP-ribosyltransferase 3                                                                  | protein_coding | 109979 | -        |
| ENSMUSG00000<br>034855 | 8.46   | 11.677 | 3.546  | 2.48357E-06 | 3.19909E-05 | Cxcl10  | chemokine (C-X-C motif) ligand 10                                                         | protein_coding | 15945  | -        |
| ENSMUSG00000<br>034919 | 7.2    | 9.034  | 3.175  | 4.95482E-05 | 0.000370197 | Ttc22   | tetratricopeptide repeat domain 22                                                        | protein_coding | 230576 | -        |
| ENSMUSG00000<br>034959 | 32.44  | 0.221  | -2.177 | 1.21448E-06 | 1.77566E-05 | Rubcn1  | RUN and cysteine rich domain containing beclin 1 interacting protein like                 | protein_coding | 271221 | -        |
| ENSMUSG00000<br>035032 | 19.08  | 4.071  | 2.025  | 0.000403678 | 0.002015476 | Nek11   | NIMA (never in mitosis gene a)-related expressed kinase 11                                | protein_coding | 208583 | -        |

|                    |        |        |        |             |             |         |                                                                     |                |        |         |
|--------------------|--------|--------|--------|-------------|-------------|---------|---------------------------------------------------------------------|----------------|--------|---------|
| ENSMUSG00000035067 | 56.02  | 5.005  | 2.323  | 1.33947E-09 | 6.64887E-08 | Xkr6    | X-linked Kx blood group related 6                                   | protein_coding | 219149 | -       |
| ENSMUSG00000035177 | 4.29   | 4.85   | 2.278  | 0.019851919 | 0.046764439 | Nlrp2   | NLR family, pyrin domain containing 2                               | protein_coding | 232827 | -       |
| ENSMUSG00000035184 | 7.04   | 4.744  | 2.246  | 0.005128197 | 0.015863068 | Fam124a | family with sequence similarity 124, member A                       | protein_coding | 629059 | -       |
| ENSMUSG00000035227 | 75.03  | 0.157  | -2.674 | 5.87248E-11 | 4.60797E-09 | Spes2   | signal peptidase complex subunit 2 homolog ( <i>S. cerevisiae</i> ) | protein_coding | 66624  | -       |
| ENSMUSG00000035246 | 27.32  | 4.178  | 2.063  | 4.06879E-06 | 4.81317E-05 | Pcvt1b  | phosphate cytidyltransferase 1, choline, beta isoform               | protein_coding | 236899 | -       |
| ENSMUSG00000035273 | 152.29 | 4.19   | 2.067  | 1.57391E-07 | 3.26576E-06 | Hpse    | heparanase                                                          | protein_coding | 15442  | -       |
| ENSMUSG00000035274 | 8.37   | 5.37   | 2.425  | 0.000261146 | 0.001413412 | Tpbp    | trophoblast glycoprotein                                            | protein_coding | 21983  | -       |
| ENSMUSG00000035283 | 9.97   | 6.853  | 2.777  | 0.002632016 | 0.009237246 | Adrb1   | adrenergic receptor, beta 1                                         | protein_coding | 11554  | -       |
| ENSMUSG00000035342 | 8.08   | 5.277  | 2.4    | 0.001771257 | 0.006716124 | Lzts2   | leucine zipper, putative tumor suppressor 2                         | protein_coding | 226154 | -       |
| ENSMUSG00000035357 | 37.02  | 4.582  | 2.196  | 3.34011E-08 | 9.0632E-07  | Pdzr3   | PDZ domain containing RING finger 3                                 | protein_coding | 55983  | -       |
| ENSMUSG00000035370 | 43.98  | 0.19   | -2.397 | 1.28682E-08 | 4.23497E-07 | Adat3   | -                                                                   | protein_coding | -      | -       |
| ENSMUSG00000035390 | 8.41   | 6.115  | 2.612  | 0.000499314 | 0.002389395 | Brsk1   | BR serine/threonine kinase 1                                        | protein_coding | 381979 | -       |
| ENSMUSG00000035403 | 5.48   | 5.2    | 2.379  | 0.003820533 | 0.012504766 | Crb2    | crumbs family member 2                                              | protein_coding | 241324 | -       |
| ENSMUSG00000035407 | 8.36   | 12.671 | 3.663  | 8.92107E-05 | 0.000595257 | Kank4   | KN motif and ankyrin repeat domains 4                               | protein_coding | 242553 | -       |
| ENSMUSG00000035429 | 11.53  | 5.977  | 2.58   | 0.004471928 | 0.01419217  | Ptprh   | protein tyrosine phosphatase, receptor type, H                      | protein_coding | 545902 | -       |
| ENSMUSG00000035456 | 9.3    | 10.132 | 3.341  | 4.7473E-06  | 5.45773E-05 | Prdm8   | PR domain containing 8                                              | protein_coding | 77630  | zf-C2H2 |
| ENSMUSG00000035459 | 20     | 5.696  | 2.51   | 5.59921E-06 | 6.25698E-05 | Stab2   | stabilin 2                                                          | protein_coding | 192188 | -       |
| ENSMUSG00000035478 | 58.91  | 0.25   | -2.001 | 3.01214E-08 | 8.32694E-07 | Mbd3    | methyl-CpG binding domain protein 3                                 | protein_coding | 17192  | MBD     |
| ENSMUSG00000035486 | 6.95   | 11.869 | 3.569  | 8.47555E-05 | 0.000570188 | Plk5    | polo like kinase 5                                                  | protein_coding | 216166 | -       |
| ENSMUSG00000035498 | 8.11   | 7.055  | 2.819  | 0.000726058 | 0.00324218  | Cdcp1   | CUB domain containing protein 1                                     | protein_coding | 109332 | -       |
| ENSMUSG00000035606 | 8.33   | 8.5    | 3.087  | 0.00043326  | 0.00213939  | Ky      | kyphoscoliosis peptidase                                            | protein_coding | 16716  | -       |
| ENSMUSG00000035615 | 21.11  | 4.433  | 2.148  | 0.000244169 | 0.001341324 | Frmpd1  | FERM and PDZ domain containing 1                                    | protein_coding | 666060 | -       |
| ENSMUSG00000035683 | 7.05   | 4.173  | 2.061  | 0.00435378  | 0.013910574 | Melk    | maternal embryonic leucine zipper kinase                            | protein_coding | 17279  | -       |
| ENSMUSG00000035772 | 8.59   | 0.062  | -4.005 | 1.7723E-06  | 2.43661E-05 | Mrps2   | mitochondrial ribosomal protein S2                                  | protein_coding | 118451 | -       |

|                    |        |       |        |             |             |                |                                                                      |                |        |            |
|--------------------|--------|-------|--------|-------------|-------------|----------------|----------------------------------------------------------------------|----------------|--------|------------|
| ENSMUSG00000035829 | 5.52   | 8.678 | 3.117  | 0.008293074 | 0.023331493 | Ppp1r26        | protein phosphatase 1, regulatory subunit 26                         | protein_coding | 241289 | -          |
| ENSMUSG00000035873 | 14.31  | 4.586 | 2.197  | 0.000410004 | 0.002040819 | Pawr           | PRKC, apoptosis, WT1, regulator                                      | protein_coding | 114774 | -          |
| ENSMUSG00000035934 | 28.57  | 5.361 | 2.423  | 2.93549E-05 | 0.000242296 | Pknox2         | Pbx/knotted 1 homeobox 2                                             | protein_coding | 208076 | Homeobox   |
| ENSMUSG00000035958 | 20.61  | 0.221 | -2.181 | 0.000370057 | 0.001873127 | Tdp2           | tyrosyl-DNA phosphodiesterase 2                                      | protein_coding | 56196  | -          |
| ENSMUSG00000036030 | 12.65  | 4.293 | 2.102  | 8.11092E-05 | 0.000550397 | Prtg           | protogenin                                                           | protein_coding | 235472 | -          |
| ENSMUSG00000036052 | 8.77   | 0.221 | -2.177 | 0.000929306 | 0.003968322 | Dnajb5         | DnaJ heat shock protein family (Hsp40) member B5                     | protein_coding | 56323  | -          |
| ENSMUSG00000036061 | 11.18  | 0.249 | -2.005 | 0.00633188  | 0.018824411 | Smug1          | single-strand selective monofunctional uracil DNA glycosylase        | protein_coding | 71726  | -          |
| ENSMUSG00000036078 | 21.68  | 0.189 | -2.4   | 1.50912E-06 | 2.12685E-05 | Sigmar1        | sigma non-opioid intracellular receptor 1                            | protein_coding | 18391  | -          |
| ENSMUSG00000036098 | 6      | 4.232 | 2.081  | 0.005373715 | 0.016472243 | Myrf           | myelin regulatory factor                                             | protein_coding | 225908 | NDT80/PhoG |
| ENSMUSG00000036158 | 19.1   | 4.304 | 2.106  | 5.90402E-05 | 0.000425208 | Prickle1       | prickle planar cell polarity protein 1                               | protein_coding | 106042 | -          |
| ENSMUSG00000036160 | 27.55  | 0.163 | -2.619 | 4.08891E-09 | 1.67366E-07 | Surf6          | surfeit gene 6                                                       | protein_coding | 20935  | -          |
| ENSMUSG00000036192 | 19.51  | 4.705 | 2.234  | 0.000214229 | 0.001206355 | Rorb           | RAR-related orphan receptor beta                                     | protein_coding | 225998 | THR-like   |
| ENSMUSG00000036198 | 6.37   | 5.586 | 2.482  | 0.007360437 | 0.021222671 | Arhgap36       | Rho GTPase activating protein 36                                     | protein_coding | 75404  | -          |
| ENSMUSG00000036218 | 36.05  | 4.155 | 2.055  | 4.53065E-05 | 0.000345402 | Pdzrn4         | PDZ domain containing RING finger 4                                  | protein_coding | 239618 | -          |
| ENSMUSG00000036251 | 10.85  | 9.2   | 3.202  | 2.42766E-06 | 3.14058E-05 | Trpm8          | transient receptor potential cation channel, subfamily M, member 8   | protein_coding | 171382 | -          |
| ENSMUSG00000036264 | 45.89  | 4.144 | 2.051  | 1.60991E-07 | 3.31369E-06 | Fstl4          | follistatin-like 4                                                   | protein_coding | 320027 | -          |
| ENSMUSG00000036295 | 259.16 | 4.826 | 2.271  | 2.05495E-07 | 4.09373E-06 | Lrn3           | leucine rich repeat protein 3, neuronal                              | protein_coding | 16981  | -          |
| ENSMUSG00000036298 | 30.53  | 4.527 | 2.179  | 2.20268E-08 | 6.48258E-07 | Slc2a13        | solute carrier family 2 (facilitated glucose transporter), member 13 | protein_coding | 239606 | -          |
| ENSMUSG00000036353 | 898.48 | 6.671 | 2.738  | 1.6384E-11  | 1.57435E-09 | P2ry12         | purinergic receptor P2Y, G-protein coupled 12                        | protein_coding | 70839  | -          |
| ENSMUSG00000036356 | 90.57  | 4.705 | 2.234  | 6.31645E-09 | 2.37448E-07 | Csgalnact1     | chondroitin sulfate N-acetylgalactosaminyltransferase 1              | protein_coding | 234356 | -          |
| ENSMUSG00000036377 | 101.67 | 4.064 | 2.023  | 2.28803E-08 | 6.7179E-07  | C530008M17 Rik | RIKEN cDNA C530008M17 gene                                           | protein_coding | 320827 | -          |
| ENSMUSG00000036459 | 6.41   | 7.043 | 2.816  | 0.002484111 | 0.008826772 | Wtip           | WT1-interacting protein                                              | protein_coding | 101543 | -          |
| ENSMUSG00000036504 | 8.05   | 0.128 | -2.97  | 0.000506473 | 0.002420428 | Phpt1          | phosphohistidine phosphatase 1                                       | protein_coding | 75454  | -          |
| ENSMUSG00000036510 | 32.98  | 4.104 | 2.037  | 1.52329E-05 | 0.000141824 | Cdh8           | cadherin 8                                                           | protein_coding | 12564  | -          |



|                        |        |       |        |             |                      |                                    |                                                                                                |                |        |         |
|------------------------|--------|-------|--------|-------------|----------------------|------------------------------------|------------------------------------------------------------------------------------------------|----------------|--------|---------|
| ENSMUSG00000<br>036523 | 14.36  | 6.777 | 2.761  | 8.8809E-06  | 9.08257E-05          | Greb1                              | gene regulated by estrogen in breast cancer protein                                            | protein_coding | 268527 | -       |
| ENSMUSG00000<br>036545 | 28.72  | 8.73  | 3.126  | 1.77638E-14 | 4.19998E-12          | Adams2                             | a disintegrin-like and metalloproteinase (reprolysin type) with thrombospondin type 1 motif, 2 | protein_coding | 216725 | -       |
| ENSMUSG00000<br>036564 | 8.7    | 7.836 | 2.97   | 0.000166077 | 0.000981659          | Ndr4                               | N-myc downstream regulated gene 4                                                              | protein_coding | 234593 | -       |
| ENSMUSG00000<br>036594 | 688.79 | 0.02  | -5.66  | 1.08897E-23 | 9.31795E-21          | H2-Aa                              | histocompatibility 2, class II antigen A, alpha                                                | protein_coding | 14960  | -       |
| ENSMUSG00000<br>036596 | 6.67   | 5.707 | 2.513  | 0.005234728 | 0.016145354          | Cpz                                | carboxypeptidase Z                                                                             | protein_coding | 242939 | -       |
| ENSMUSG00000<br>036693 | 21.81  | 0.228 | -2.132 | 1.28491E-05 | 0.000123007          | Nop14                              | NOPI4 nucleolar protein                                                                        | protein_coding | 75416  | -       |
| ENSMUSG00000<br>036718 | 8.65   | 5.687 | 2.508  | 0.000257413 | 0.00139784           | Micall2                            | MICAL-like 2                                                                                   | protein_coding | 231830 | -       |
| ENSMUSG00000<br>036760 | 6.24   | 4.778 | 2.256  | 0.001952944 | 0.007268529          | Kcnk9                              | potassium channel, subfamily K, member 9                                                       | protein_coding | 223604 | -       |
| ENSMUSG00000<br>036775 | 5.22   | 0.223 | -2.166 | 0.010723814 | 0.028734895          | Decor2                             | 2-4-dienoyl-Coenzyme A reductase 2, peroxisomal                                                | protein_coding | 26378  | -       |
| ENSMUSG00000<br>036800 | 27.58  | 4.75  | 2.248  | 0.000221642 | 0.001240325          | Fam135b                            | family with sequence similarity 135, member B                                                  | protein_coding | 70363  | -       |
| ENSMUSG00000<br>036814 | 6.87   | 4.998 | 2.321  | 0.00155597  | 0.006055714          | Slc6a20a                           | solute carrier family 6 (neurotransmitter transporter), member 20A                             | protein_coding | 102680 | -       |
| ENSMUSG00000<br>036819 | 10.51  | 0.146 | -2.775 | 5.66171E-05 | 0.000412051          | Jmjd4                              | jumonji domain containing 4                                                                    | protein_coding | 194952 | -       |
| ENSMUSG00000<br>036825 | 28.47  | 4.416 | 2.143  | 3.5062E-05  | 0.000281263          | Ssx2ip                             | synovial sarcoma, X 2 interacting protein                                                      | protein_coding | 99167  | -       |
| ENSMUSG00000<br>036867 | 17.02  | 4.075 | 2.027  | 0.000192616 | 0.001107555          | Smad6                              | SMAD family member 6                                                                           | protein_coding | 17130  | MH1     |
| ENSMUSG00000<br>036962 | 11.36  | 6.212 | 2.635  | 0.000961435 | 0.004086101          | Cfap221                            | cilia and flagella associated protein 221                                                      | protein_coding | 226356 | -       |
| ENSMUSG00000<br>036980 | 20.49  | 0.158 | -2.665 | 7.35518E-06 | 7.76533E-05          | Taf6                               | TATA-box binding protein associated factor 6                                                   | protein_coding | 21343  | -       |
| ENSMUSG00000<br>036986 | 108.91 | 0.123 | -3.026 | 2.85635E-13 | 4.84205E-11          | Pml                                | promyelocytic leukemia                                                                         | protein_coding | 18854  | -       |
| ENSMUSG00000<br>037029 | 25.1   | 0.231 | -2.111 | 8.99998E-07 | 1.39055E-05          | Zfp146                             | zinc finger protein 146                                                                        | protein_coding | 26465  | zf-C2H2 |
| ENSMUSG00000<br>037032 | 11.73  | 6.622 | 2.727  | 2.95445E-05 | 0.000243302          | Apbb1                              | amyloid beta (A4) precursor protein-binding, family B, member 1                                | protein_coding | 11785  | -       |
| ENSMUSG00000<br>037035 | 10.2   | 7.825 | 2.968  | 1.29592E-05 | 0.000123864          | Inhbb                              | inhibin beta-B                                                                                 | protein_coding | 16324  | -       |
| ENSMUSG00000<br>037071 | 86.41  | 0.035 | -4.841 | 2.81957E-20 | 1.5353E-17           | Scd1                               | stearoyl-Coenzyme A desaturase 1                                                               | protein_coding | 20249  | -       |
| ENSMUSG00000<br>037149 | 14.63  | 0.158 | -2.662 | 0.000199821 | 0.001142097          | Ddx1                               | DEAD (Asp-Glu-Ala-Asp) box polypeptide 1                                                       | protein_coding | 104721 | -       |
| ENSMUSG00000<br>037211 | 8.72   | 4.37  | 2.127  | 0.00531439  | 0.016318265a<br>ladi | sprouty RTK signaling antagonist 1 |                                                                                                | protein_coding | 24063  | -       |

|                        |        |        |        |             |             |          |                                                            |                |        |         |
|------------------------|--------|--------|--------|-------------|-------------|----------|------------------------------------------------------------|----------------|--------|---------|
| ENSMUSG00000<br>037236 | 93.05  | 0.211  | -2.244 | 4.86841E-11 | 3.94056E-09 | Matr3    | matrin 3                                                   | protein_coding | 17184  | -       |
| ENSMUSG00000<br>037242 | 678.78 | 4.808  | 2.265  | 2.76899E-08 | 7.8356E-07  | Clic4    | chloride intracellular channel 4<br>(mitochondrial)        | protein_coding | 29876  | -       |
| ENSMUSG00000<br>037262 | 12.13  | 0.171  | -2.548 | 0.000135323 | 0.000835609 | Kin      | Kin17 DNA and RNA binding<br>protein                       | protein_coding | 16588  | -       |
| ENSMUSG00000<br>037278 | 6.36   | 4.187  | 2.066  | 0.013702814 | 0.034709031 | Tmem97   | transmembrane protein 97                                   | protein_coding | 69071  | -       |
| ENSMUSG00000<br>037279 | 7.74   | 25.053 | 4.647  | 4.38729E-08 | 1.12587E-06 | Ovol2    | ovo like zinc finger 2                                     | protein_coding | 107586 | zf-C2H2 |
| ENSMUSG00000<br>037316 | 10.82  | 0.096  | -3.375 | 1.53381E-06 | 2.15394E-05 | Bag4     | BCL2-associated athanogene 4                               | protein_coding | 67384  | -       |
| ENSMUSG00000<br>037336 | 129.37 | 4.072  | 2.026  | 2.53986E-07 | 4.88116E-06 | Mfsd2b   | major facilitator superfamily domain<br>containing 2B      | protein_coding | 432628 | -       |
| ENSMUSG00000<br>037337 | 63.34  | 0.242  | -2.048 | 6.12321E-08 | 1.4882E-06  | Map4k1   | mitogen-activated protein kinase<br>kinase kinase kinase 1 | protein_coding | 26411  | -       |
| ENSMUSG00000<br>037361 | 57.84  | 0.199  | -2.328 | 2.02381E-09 | 9.49499E-08 | Sf3b6    | splicing factor 3B, subunit 6                              | protein_coding | 66055  | -       |
| ENSMUSG00000<br>037386 | 41.16  | 6.505  | 2.702  | 4.6105E-09  | 1.85338E-07 | Rims2    | regulating synaptic membrane<br>exocytosis 2               | protein_coding | 116838 | -       |
| ENSMUSG00000<br>037406 | 4.75   | 5.638  | 2.495  | 0.015069686 | 0.037458458 | Htra4    | HtrA serine peptidase 4                                    | protein_coding | 330723 | -       |
| ENSMUSG00000<br>037455 | 26.38  | 6.217  | 2.636  | 0.000684956 | 0.003091677 | Slc18b1  | solute carrier family 18, subfamily<br>B, member 1         | protein_coding | 76306  | -       |
| ENSMUSG00000<br>037461 | 20.77  | 0.17   | -2.557 | 7.66019E-05 | 0.000525567 | Ints7    | integrator complex subunit 7                               | protein_coding | 77065  | -       |
| ENSMUSG00000<br>037531 | 15.26  | 0.136  | -2.883 | 5.27748E-06 | 5.96046E-05 | Mrp147   | mitochondrial ribosomal protein L47                        | protein_coding | 74600  | -       |
| ENSMUSG00000<br>037541 | 64.84  | 5.51   | 2.462  | 3.55796E-06 | 4.32272E-05 | Shank2   | SH3 and multiple ankyrin repeat<br>domains 2               | protein_coding | 210274 | -       |
| ENSMUSG00000<br>037544 | 9      | 4.055  | 2.02   | 0.010541166 | 0.028329975 | Dlgap5   | DLG associated protein 5                                   | protein_coding | 218977 | -       |
| ENSMUSG00000<br>037548 | 212.94 | 0.024  | -5.364 | 2.81982E-24 | 2.53347E-21 | H2-DMb2  | histocompatibility 2, class II, locus<br>Mb2               | protein_coding | 15000  | -       |
| ENSMUSG00000<br>037594 | 6.37   | 4.816  | 2.268  | 0.009615246 | 0.026277773 | BC022687 | clathrin binding box of aftiphilin<br>containing 1         | protein_coding | 217887 | -       |
| ENSMUSG00000<br>037649 | 89.37  | 0.092  | -3.441 | 3.41712E-20 | 1.80595E-17 | H2-DMa   | histocompatibility 2, class II, locus<br>DMa               | protein_coding | 14998  | -       |
| ENSMUSG00000<br>037664 | 8.62   | 6.541  | 2.709  | 0.000254377 | 0.001386801 | Cdkn1c   | cyclin-dependent kinase inhibitor 1C<br>(P57)              | protein_coding | 12577  | -       |
| ENSMUSG00000<br>037686 | 4.48   | 7.66   | 2.937  | 0.000707754 | 0.003179408 | Aspg     | asparaginase                                               | protein_coding | 104816 | -       |
| ENSMUSG00000<br>037705 | 14.84  | 5.753  | 2.524  | 0.000710382 | 0.003188823 | Tecta    | tectorin alpha                                             | protein_coding | 21683  | -       |
| ENSMUSG00000<br>037708 | 5.64   | 5.109  | 2.353  | 0.005682279 | 0.017267859 | Spag6    | sperm associated antigen 6                                 | protein_coding | 381350 | -       |
| ENSMUSG00000<br>037712 | 7.02   | 7.244  | 2.857  | 0.000187444 | 0.001082323 | Fermt2   | fermitin family member 2                                   | protein_coding | 218952 | -       |

|                        |        |        |        |             |             |                   |                                                                    |                |               |   |
|------------------------|--------|--------|--------|-------------|-------------|-------------------|--------------------------------------------------------------------|----------------|---------------|---|
| ENSMUSG00000<br>037722 | 11.74  | 0.21   | -2.254 | 0.000166542 | 0.00098408  | Gnpnat1           | glucosamine-phosphate N-<br>acetyltransferase 1                    | protein_coding | 54342         | - |
| ENSMUSG00000<br>037740 | 33.3   | 0.164  | -2.608 | 6.85123E-06 | 7.32796E-05 | Mrps26            | mitochondrial ribosomal protein S26                                | protein_coding | 99045         | - |
| ENSMUSG00000<br>037771 | 5.8    | 7.403  | 2.888  | 0.00291334  | 0.010022937 | Slc32a1           | solute carrier family 32 (GABA<br>vesicular transporter), member 1 | protein_coding | 22348         | - |
| ENSMUSG00000<br>037772 | 17.87  | 0.114  | -3.134 | 1.53655E-07 | 3.19563E-06 | Mrpl23            | mitochondrial ribosomal protein L23                                | protein_coding | 19935         | - |
| ENSMUSG00000<br>037805 | 809.79 | 0.228  | -2.131 | 3.6102E-09  | 1.49819E-07 | Rpl10a            | ribosomal protein L10A                                             | protein_coding | 19896         | - |
| ENSMUSG00000<br>037813 | 7.69   | 5.119  | 2.356  | 0.000310753 | 0.00163034  | D630003M21<br>Rik | RIKEN cDNA D630003M21 gene                                         | protein_coding | 228846        | - |
| ENSMUSG00000<br>037849 | 23.99  | 0.149  | -2.745 | 3.409E-06   | 4.15861E-05 | Ifi206            | interferon activated gene 206                                      | protein_coding | 102639<br>543 | - |
| ENSMUSG00000<br>037852 | 18.1   | 7.877  | 2.978  | 1.09447E-07 | 2.39913E-06 | Cpe               | carboxypeptidase E                                                 | protein_coding | 12876         | - |
| ENSMUSG00000<br>037884 | 7.72   | 48.616 | 5.603  | 2.00906E-09 | 9.47529E-08 | 1700017G19R<br>ik | RIKEN cDNA 1700017G19 gene                                         | lincRNA        | 100040<br>882 | - |
| ENSMUSG00000<br>037942 | 7.91   | 5.359  | 2.422  | 0.00091652  | 0.003924917 | Crp               | C-reactive protein, pentraxin-related                              | protein_coding | 12944         | - |
| ENSMUSG00000<br>037944 | 240.72 | 0.135  | -2.888 | 8.19496E-13 | 1.24793E-10 | Ccr7              | chemokine (C-C motif) receptor 7                                   | protein_coding | 12775         | - |
| ENSMUSG00000<br>037966 | 488.2  | 4.309  | 2.107  | 1.27806E-07 | 2.72425E-06 | Ninj1             | ninjurin 1                                                         | protein_coding | 18081         | - |
| ENSMUSG00000<br>037971 | 214.36 | 5.165  | 2.369  | 1.14751E-10 | 8.05451E-09 | 1110032A03R<br>ik | RIKEN cDNA 1110032A03 gene                                         | protein_coding | 68721         | - |
| ENSMUSG00000<br>037979 | 282.55 | 4.363  | 2.125  | 2.83742E-07 | 5.38779E-06 | Ccdc92            | coiled-coil domain containing 92                                   | protein_coding | 215707        | - |
| ENSMUSG00000<br>038000 | 32.41  | 0.226  | -2.146 | 4.62466E-06 | 5.34342E-05 | Acd               | adrenocortical dysplasia                                           | protein_coding | 497652        | - |
| ENSMUSG00000<br>038007 | 204.09 | 4.263  | 2.092  | 4.19085E-07 | 7.4339E-06  | Acer2             | alkaline ceramidase 2                                              | protein_coding | 230379        | - |
| ENSMUSG00000<br>038011 | 25.68  | 10.348 | 3.371  | 1.4345E-12  | 1.93809E-10 | Dnah10            | dynein, axonemal, heavy chain 10                                   | protein_coding | 56087         | - |
| ENSMUSG00000<br>038022 | 20.99  | 5.597  | 2.485  | 4.17611E-05 | 0.000322894 | Mindy4            | MINDY lysine 48 deubiquitinase 4                                   | protein_coding | 330323        | - |
| ENSMUSG00000<br>038055 | 155.81 | 0.107  | -3.229 | 9.6863E-20  | 4.83481E-17 | Dexi              | dexamethasone-induced transcript                                   | protein_coding | 58239         | - |
| ENSMUSG00000<br>038059 | 568.19 | 6.993  | 2.806  | 5.0458E-10  | 2.81577E-08 | Smim3             | small integral membrane protein 3                                  | protein_coding | 106878        | - |
| ENSMUSG00000<br>038060 | 12.96  | 7.255  | 2.859  | 0.000107759 | 0.00069402  | Dlec1             | deleted in lung and esophageal<br>cancer 1                         | protein_coding | 320256        | - |
| ENSMUSG00000<br>038115 | 110.92 | 4.718  | 2.238  | 7.09177E-10 | 3.79262E-08 | Ano2              | anoctamin 2                                                        | protein_coding | 243634        | - |
| ENSMUSG00000<br>038143 | 45.1   | 4.981  | 2.316  | 1.93146E-06 | 2.60363E-05 | Stox2             | storkhead box 2                                                    | protein_coding | 71069         | - |
| ENSMUSG00000<br>038168 | 14.04  | 4.093  | 2.033  | 9.54353E-05 | 0.000628621 | P3h2              | prolyl 3-hydroxylase 2                                             | protein_coding | 210530        | - |

|                        |        |       |        |             |             |          |                                                                       |                |        |      |
|------------------------|--------|-------|--------|-------------|-------------|----------|-----------------------------------------------------------------------|----------------|--------|------|
| ENSMUSG00000<br>038233 | 4.71   | 8.627 | 3.109  | 0.00017614  | 0.001028121 | Fam198a  | family with sequence similarity 198,<br>member A                      | protein_coding | 245050 | -    |
| ENSMUSG00000<br>038235 | 44.09  | 4.608 | 2.204  | 2.39678E-06 | 3.11409E-05 | F11r     | F11 receptor                                                          | protein_coding | 16456  | -    |
| ENSMUSG00000<br>038241 | 36.08  | 0.245 | -2.026 | 3.79687E-07 | 6.82942E-06 | Cep250   | centrosomal protein 250                                               | protein_coding | 16328  | -    |
| ENSMUSG00000<br>038248 | 32.19  | 5.15  | 2.365  | 2.79994E-08 | 7.88305E-07 | Sobp     | sine oculis binding protein                                           | protein_coding | 109205 | -    |
| ENSMUSG00000<br>038255 | 7.28   | 5.237 | 2.389  | 0.005194606 | 0.01604088  | Neurod2  | neurogenic differentiation 2                                          | protein_coding | 18013  | bHLH |
| ENSMUSG00000<br>038267 | 46.94  | 4.74  | 2.245  | 9.81194E-09 | 3.42063E-07 | Slc22a23 | solute carrier family 22, member 23                                   | protein_coding | 73102  | -    |
| ENSMUSG00000<br>038268 | 12.07  | 0.132 | -2.923 | 2.94927E-06 | 3.69564E-05 | Ovca2    | candidate tumor suppressor in<br>ovarian cancer 2                     | protein_coding | 246257 | -    |
| ENSMUSG00000<br>038279 | 17.33  | 0.201 | -2.316 | 3.17601E-06 | 3.92231E-05 | Nop2     | NOP2 nucleolar protein                                                | protein_coding | 110109 | -    |
| ENSMUSG00000<br>038296 | 22.18  | 4.267 | 2.093  | 1.96522E-05 | 0.000175425 | Galnt18  | polypeptide N-<br>acetylgalactosaminyltransferase 18                  | protein_coding | 233733 | -    |
| ENSMUSG00000<br>038299 | 14.7   | 0.127 | -2.978 | 3.41302E-06 | 4.16069E-05 | Wdr36    | WD repeat domain 36                                                   | protein_coding | 225348 | -    |
| ENSMUSG00000<br>038331 | 26.88  | 4.489 | 2.167  | 6.99377E-07 | 1.12811E-05 | Satb2    | special AT-rich sequence binding<br>protein 2                         | protein_coding | 212712 | CUT  |
| ENSMUSG00000<br>038352 | 62.48  | 0.129 | -2.953 | 2.0124E-13  | 3.54518E-11 | Arl5c    | ADP-ribosylation factor-like 5C                                       | protein_coding | 217151 | -    |
| ENSMUSG00000<br>038370 | 626.88 | 4.473 | 2.161  | 1.75159E-06 | 2.41738E-05 | Pcp4l1   | Purkinje cell protein 4-like 1                                        | protein_coding | 66425  | -    |
| ENSMUSG00000<br>038379 | 7.1    | 7.473 | 2.902  | 6.4037E-05  | 0.000453918 | Ttk      | Ttk protein kinase                                                    | protein_coding | 22137  | -    |
| ENSMUSG00000<br>038416 | 22.02  | 0.214 | -2.227 | 1.57768E-06 | 2.20259E-05 | Cdc16    | CDC16 cell division cycle 16                                          | protein_coding | 69957  | -    |
| ENSMUSG00000<br>038421 | 77.58  | 0.036 | -4.782 | 2.64393E-27 | 3.16726E-24 | Fcrla    | Fc receptor-like A                                                    | protein_coding | 98752  | -    |
| ENSMUSG00000<br>038437 | 134.57 | 0.218 | -2.2   | 1.04935E-09 | 5.3416E-08  | Mllt6    | myeloid/lymphoid or mixed-lineage<br>leukemia; translocated to, 6     | protein_coding | 246198 | -    |
| ENSMUSG00000<br>038453 | 20.03  | 4.708 | 2.235  | 0.000188597 | 0.00108828  | Srcin1   | SRC kinase signaling inhibitor 1                                      | protein_coding | 56013  | -    |
| ENSMUSG00000<br>038457 | 6.43   | 4.675 | 2.225  | 0.00931078  | 0.025595826 | Tmem255b | transmembrane protein 255B                                            | protein_coding | 272465 | -    |
| ENSMUSG00000<br>038462 | 49.85  | 0.232 | -2.106 | 8.49138E-07 | 1.3222E-05  | Uqcrls1  | ubiquinol-cytochrome c reductase,<br>Rieske iron-sulfur polypeptide 1 | protein_coding | 66694  | -    |
| ENSMUSG00000<br>038463 | 4.98   | 4.249 | 2.087  | 0.00720185  | 0.020832266 | Olfml2b  | olfactomedin-like 2B                                                  | protein_coding | 320078 | -    |
| ENSMUSG00000<br>038520 | 64.57  | 0.248 | -2.01  | 5.86166E-08 | 1.43891E-06 | Tbc1d17  | TBC1 domain family, member 17                                         | protein_coding | 233204 | -    |
| ENSMUSG00000<br>038527 | 9.05   | 4.719 | 2.238  | 0.000315534 | 0.001649168 | C1rl     | complement component 1, r<br>subcomponent-like                        | protein_coding | 232371 | -    |
| ENSMUSG00000<br>038591 | 6.37   | 7.631 | 2.932  | 0.000147496 | 0.00089539  | Colec10  | collectin sub-family member 10                                        | protein_coding | 239447 | -    |

|                    |        |       |        |             |             |               |                                                                         |                |        |          |
|--------------------|--------|-------|--------|-------------|-------------|---------------|-------------------------------------------------------------------------|----------------|--------|----------|
| ENSMUSG00000038593 | 173.05 | 0.129 | -2.953 | 1.18038E-13 | 2.26046E-11 | Tctn1         | tectonic family member 1                                                | protein_coding | 654470 | -        |
| ENSMUSG00000038598 | 9.51   | 5.924 | 2.567  | 0.000692109 | 0.0031177   | AI481877      | expressed sequence AI481877                                             | protein_coding | 100155 | -        |
| ENSMUSG00000038762 | 44.41  | 0.249 | -2.003 | 1.49105E-07 | 3.12633E-06 | Abcf1         | ATP-binding cassette, sub-family F (GCN20), member 1                    | protein_coding | 224742 | -        |
| ENSMUSG00000038765 | 17.12  | 4.79  | 2.26   | 0.000154979 | 0.000929822 | Lmx1b         | LIM homeobox transcription factor 1 beta                                | protein_coding | 16917  | Homeobox |
| ENSMUSG00000038775 | 8.1    | 8.068 | 3.012  | 0.001551297 | 0.006042759 | Vill          | villin-like                                                             | protein_coding | 22351  | -        |
| ENSMUSG00000038777 | 5.67   | 8.606 | 3.105  | 0.002350451 | 0.008467373 | Sema6c        | sema domain, transmembrane (TM), and cytoplasmic domain (semaphorin) 6C | protein_coding | 20360  | -        |
| ENSMUSG00000038801 | 6      | 5.155 | 2.366  | 0.001191455 | 0.004863529 | Scgb1c1       | secretoglobin, family 1C, member 1                                      | protein_coding | 338417 | -        |
| ENSMUSG00000038805 | 11.58  | 6.216 | 2.636  | 0.001060672 | 0.004430076 | Six3          | sine oculis-related homeobox 3                                          | protein_coding | 20473  | Homeobox |
| ENSMUSG00000038812 | 67.58  | 0.247 | -2.018 | 1.34258E-08 | 4.35465E-07 | Trmt112       | tRNA methyltransferase 11-2                                             | protein_coding | 67674  | -        |
| ENSMUSG00000038816 | 15.45  | 4.437 | 2.149  | 0.005974565 | 0.017976719 | Cttna1        | catenin (cadherin associated protein), alpha-like 1                     | protein_coding | 54366  | -        |
| ENSMUSG00000038845 | 57.37  | 0.199 | -2.327 | 2.13621E-08 | 6.34472E-07 | Phb           | prohibitin                                                              | protein_coding | 18673  | -        |
| ENSMUSG00000038884 | 10.27  | 0.098 | -3.351 | 5.18751E-06 | 5.86623E-05 | A230050P20Rik | RIKEN cDNA A230050P20 gene                                              | protein_coding | 319278 | -        |
| ENSMUSG00000038886 | 62.55  | 0.233 | -2.104 | 1.37263E-08 | 4.42313E-07 | Man2a2        | mannosidase 2, alpha 2                                                  | protein_coding | 140481 | -        |
| ENSMUSG00000038888 | 9.18   | 0.181 | -2.463 | 0.000662722 | 0.003013271 | Ctu1          | cytosolic thioridylase subunit 1                                        | protein_coding | 233189 | -        |
| ENSMUSG00000038902 | 18.34  | 0.192 | -2.384 | 6.12042E-06 | 6.69372E-05 | Pogz          | pogo transposable element with ZNF domain                               | protein_coding | 229584 | -        |
| ENSMUSG00000038903 | 8.63   | 4.031 | 2.011  | 0.012161367 | 0.031666077 | Ccdc68        | coiled-coil domain containing 68                                        | protein_coding | 381175 | -        |
| ENSMUSG00000038916 | 7.81   | 4.68  | 2.227  | 0.007462573 | 0.021462063 | Soga3         | SOGA family member 3                                                    | protein_coding | 67412  | -        |
| ENSMUSG00000038932 | 6.48   | 5.19  | 2.376  | 0.003650178 | 0.012054778 | Tcf15         | transcription factor-like 5 (basic helix-loop-helix)                    | protein_coding | 277353 | bHLH     |
| ENSMUSG00000038991 | 73.78  | 0.126 | -2.994 | 7.15713E-14 | 1.49542E-11 | Txndc5        | thioredoxin domain containing 5                                         | protein_coding | 105245 | -        |
| ENSMUSG00000039018 | 10.05  | 0.186 | -2.424 | 0.000258731 | 0.001403725 | Mtg1          | mitochondrial ribosome-associated GTPase 1                              | protein_coding | 212508 | -        |
| ENSMUSG00000039055 | 3.27   | 0.018 | -5.764 | 9.41826E-05 | 0.000621508 | Eme1          | essential meiotic structure-specific endonuclease 1                     | protein_coding | 268465 | -        |
| ENSMUSG00000039057 | 47.33  | 4.261 | 2.091  | 6.2677E-06  | 6.83815E-05 | Myo16         | myosin XVI                                                              | protein_coding | 244281 | -        |
| ENSMUSG00000039058 | 24.47  | 6.319 | 2.66   | 3.75218E-06 | 4.51499E-05 | Ak5           | adenylate kinase 5                                                      | protein_coding | 229949 | -        |
| ENSMUSG00000039099 | 6.13   | 9.34  | 3.223  | 0.000137381 | 0.000845583 | Wdr93         | WD repeat domain 93                                                     | protein_coding | 626359 | -        |

|                    |         |        |        |             |             |         |                                                                      |                      |        |          |
|--------------------|---------|--------|--------|-------------|-------------|---------|----------------------------------------------------------------------|----------------------|--------|----------|
| ENSMUSG00000039168 | 1384.43 | 5.743  | 2.522  | 1.03791E-08 | 3.55919E-07 | Dap     | death-associated protein                                             | protein_coding       | 223453 | -        |
| ENSMUSG00000039178 | 10.08   | 4.169  | 2.06   | 0.005440884 | 0.01663557  | Tbc1d19 | TBC1 domain family, member 19                                        | protein_coding       | 67249  | -        |
| ENSMUSG00000039179 | 8.42    | 10.774 | 3.429  | 2.56578E-06 | 3.28613E-05 | Tekt5   | tektin 5                                                             | protein_coding       | 70426  | -        |
| ENSMUSG00000039221 | 65.08   | 0.226  | -2.147 | 1.0814E-05  | 0.000106741 | Rpl22l1 | ribosomal protein L22 like 1                                         | protein_coding       | 68028  | -        |
| ENSMUSG00000039232 | 806.51  | 4.758  | 2.25   | 4.14441E-08 | 1.08558E-06 | Stx11   | syntaxin 11                                                          | protein_coding       | 74732  | -        |
| ENSMUSG00000039238 | 6.83    | 30.254 | 4.919  | 2.18987E-07 | 4.3194E-06  | Zfp750  | zinc finger protein 750                                              | protein_coding       | 319530 | -        |
| ENSMUSG00000039264 | 356.66  | 0.178  | -2.492 | 9.46591E-14 | 1.88992E-11 | Gimap3  | GTPase, IMAP family member 3                                         | protein_coding       | 83408  | -        |
| ENSMUSG00000039323 | 7.69    | 11.997 | 3.585  | 0.00067914  | 0.003070819 | Igfbp2  | insulin-like growth factor binding protein 2                         | protein_coding       | 16008  | -        |
| ENSMUSG00000039356 | 13.63   | 0.152  | -2.716 | 5.81624E-06 | 6.41863E-05 | Exosc2  | exosome component 2                                                  | protein_coding       | 227715 | -        |
| ENSMUSG00000039357 | 15.61   | 0.205  | -2.283 | 3.87226E-05 | 0.000302656 | Fut11   | fucosyltransferase 11                                                | protein_coding       | 73068  | -        |
| ENSMUSG00000039410 | 59.09   | 6.21   | 2.635  | 1.89648E-11 | 1.76569E-09 | Prdm16  | PR domain containing 16                                              | protein_coding       | 70673  | zf-C2H2  |
| ENSMUSG00000039476 | 6.42    | 4.046  | 2.016  | 0.01374919  | 0.034801971 | Prrx2   | paired related homeobox 2                                            | protein_coding       | 20204  | Homeobox |
| ENSMUSG00000039509 | 12.88   | 0.193  | -2.375 | 0.000619207 | 0.002852223 | Nup133  | nucleoporin 133                                                      | protein_coding       | 234865 | -        |
| ENSMUSG00000039599 | 86.71   | 0.224  | -2.16  | 8.54898E-11 | 6.4007E-09  | Fam149b | family with sequence similarity 149, member B                        | protein_coding       | 105428 | -        |
| ENSMUSG00000039601 | 21.02   | 4.636  | 2.213  | 3.04327E-05 | 0.000248792 | Rcan2   | regulator of calcineurin 2                                           | protein_coding       | 53901  | -        |
| ENSMUSG00000039611 | 44.64   | 4.17   | 2.06   | 2.21041E-06 | 2.90555E-05 | Tmem246 | transmembrane protein 246                                            | protein_coding       | 67063  | -        |
| ENSMUSG00000039617 | 12.69   | 0.081  | -3.63  | 3.02443E-07 | 5.6754E-06  | Gm7488  | -                                                                    | processed_pseudogene | -      | -        |
| ENSMUSG00000039640 | 38.63   | 0.24   | -2.061 | 1.10997E-07 | 2.42937E-06 | Mrpl12  | mitochondrial ribosomal protein L12                                  | protein_coding       | 56282  | -        |
| ENSMUSG00000039660 | 10.94   | 0.123  | -3.026 | 2.05865E-05 | 0.000182316 | Spout1  | SPOUT domain containing methyltransferase 1                          | protein_coding       | 227695 | -        |
| ENSMUSG00000039678 | 37.32   | 0.243  | -2.041 | 4.28024E-07 | 7.5775E-06  | Tbc1d13 | TBC1 domain family, member 13                                        | protein_coding       | 70296  | -        |
| ENSMUSG00000039706 | 29.06   | 5.449  | 2.446  | 1.91378E-07 | 3.85957E-06 | Ldb2    | LIM domain binding 2                                                 | protein_coding       | 16826  | -        |
| ENSMUSG00000039716 | 26.61   | 4.112  | 2.04   | 8.0961E-06  | 8.42379E-05 | Dock3   | dedicator of cyto-kinesis 3                                          | protein_coding       | 208869 | -        |
| ENSMUSG00000039735 | 11.29   | 4.624  | 2.209  | 0.003241754 | 0.010951509 | Fnbp11  | formin binding protein 1-like                                        | protein_coding       | 214459 | -        |
| ENSMUSG00000039738 | 26.68   | 0.183  | -2.453 | 1.10138E-08 | 3.72004E-07 | Slx4    | SLX4 structure-specific endonuclease subunit homolog (S. cerevisiae) | protein_coding       | 52864  | -        |

|                    |        |       |        |             |             |           |                                                              |                      |        |          |
|--------------------|--------|-------|--------|-------------|-------------|-----------|--------------------------------------------------------------|----------------------|--------|----------|
| ENSMUSG00000039741 | 23.32  | 6.718 | 2.748  | 1.75014E-06 | 2.41738E-05 | Bahcc1    | BAH domain and coiled-coil containing 1                      | protein_coding       | 268515 | -        |
| ENSMUSG00000039756 | 27.03  | 0.195 | -2.36  | 1.18062E-06 | 1.73463E-05 | Dntip2    | deoxynucleotidyltransferase, terminal, interacting protein 2 | protein_coding       | 99480  | -        |
| ENSMUSG00000039763 | 9.94   | 4.216 | 2.076  | 0.005949273 | 0.017927635 | Dnajc28   | DnaJ heat shock protein family (Hsp40) member C28            | protein_coding       | 246738 | -        |
| ENSMUSG00000039783 | 29.5   | 0.171 | -2.552 | 5.18041E-06 | 5.86189E-05 | Kmo       | kynurenine 3-monooxygenase (kynurenine 3-hydroxylase)        | protein_coding       | 98256  | -        |
| ENSMUSG00000039830 | 6.17   | 6.116 | 2.613  | 0.002407146 | 0.008612906 | Olig2     | oligodendrocyte transcription factor 2                       | protein_coding       | 50913  | bHLH     |
| ENSMUSG00000039860 | 13.63  | 4.793 | 2.261  | 0.003870468 | 0.012635982 | Srm3      | serine/arginine repetitive matrix 3                          | protein_coding       | 58212  | -        |
| ENSMUSG00000039913 | 22.81  | 4.011 | 2.004  | 0.000484982 | 0.0023395   | Pak7      | p21 (RAC1) activated kinase 7                                | protein_coding       | 241656 | -        |
| ENSMUSG00000039914 | 17.3   | 0.203 | -2.301 | 3.24676E-06 | 3.99119E-05 | Coq10a    | coenzyme Q10A                                                | protein_coding       | 210582 | -        |
| ENSMUSG00000039954 | 13.79  | 8.091 | 3.016  | 4.79633E-07 | 8.3432E-06  | Stk32a    | serine/threonine kinase 32A                                  | protein_coding       | 269019 | -        |
| ENSMUSG00000039977 | 6.1    | 5.103 | 2.351  | 0.003064232 | 0.010453994 | Deup1     | deuterosome assembly protein 1                               | protein_coding       | 234964 | -        |
| ENSMUSG00000040009 | 55.6   | 5.162 | 2.368  | 1.95088E-09 | 9.32323E-08 | Gnaz      | guanine nucleotide binding protein, alpha z subunit          | protein_coding       | 14687  | -        |
| ENSMUSG00000040048 | 36.08  | 0.221 | -2.18  | 3.51441E-07 | 6.42426E-06 | Ndufb10   | NADH:ubiquinone oxidoreductase subunit B10                   | protein_coding       | 68342  | -        |
| ENSMUSG00000040078 | 8.6    | 0.195 | -2.356 | 0.000563043 | 0.00263678  | Ptges3-ps | -                                                            | processed_pseudogene | -      | -        |
| ENSMUSG00000040136 | 14.92  | 6.14  | 2.618  | 7.56633E-07 | 1.20028E-05 | Abcc8     | ATP-binding cassette, sub-family C (CFTR/MRP), member 8      | protein_coding       | 20927  | -        |
| ENSMUSG00000040152 | 204.25 | 4.995 | 2.32   | 4.18082E-07 | 7.42343E-06 | Thbs1     | thrombospondin 1                                             | protein_coding       | 21825  | -        |
| ENSMUSG00000040219 | 4.16   | 4.816 | 2.268  | 0.016181661 | 0.039662839 | Ttc12     | tetratricopeptide repeat domain 12                           | protein_coding       | 235330 | -        |
| ENSMUSG00000040265 | 50.32  | 6.287 | 2.652  | 1.66388E-13 | 3.05084E-11 | Dnm3      | dynamamin 3                                                  | protein_coding       | 103967 | -        |
| ENSMUSG00000040272 | 9.6    | 0.208 | -2.264 | 0.004276304 | 0.013716692 | Accs      | 1-aminocyclopropane-1-carboxylate synthase (non-functional)  | protein_coding       | 329470 | -        |
| ENSMUSG00000040310 | 6.05   | 8.233 | 3.041  | 0.000138599 | 0.000851157 | Alx4      | aristaless-like homeobox 4                                   | protein_coding       | 11695  | Homeobox |
| ENSMUSG00000040350 | 56.85  | 0.239 | -2.067 | 3.69289E-09 | 1.52196E-07 | Trim7     | tripartite motif-containing 7                                | protein_coding       | 94089  | -        |
| ENSMUSG00000040415 | 14.28  | 0.107 | -3.229 | 4.1445E-05  | 0.000320588 | Dtx3      | deltex 3, E3 ubiquitin ligase                                | protein_coding       | 80904  | -        |
| ENSMUSG00000040429 | 6.41   | 0.169 | -2.567 | 0.0019321   | 0.007208867 | Mterf1a   | mitochondrial transcription termination factor 1a            | protein_coding       | 545725 | -        |
| ENSMUSG00000040452 | 31.77  | 4.175 | 2.062  | 1.43798E-06 | 2.04585E-05 | Cdh12     | cadherin 12                                                  | protein_coding       | 215654 | -        |
| ENSMUSG00000040463 | 30.82  | 0.063 | -3.987 | 7.68664E-14 | 1.5876E-11  | Mybbp1a   | MYB binding protein (P160) 1a                                | protein_coding       | 18432  | -        |

|                    |        |       |        |             |             |          |                                                                              |                |           |     |
|--------------------|--------|-------|--------|-------------|-------------|----------|------------------------------------------------------------------------------|----------------|-----------|-----|
| ENSMUSG00000040464 | 6.59   | 0.172 | -2.538 | 0.001422322 | 0.005630691 | Gtpbp10  | GTP-binding protein 10 (putative)                                            | protein_coding | 207704    | -   |
| ENSMUSG00000040488 | 13.41  | 4.736 | 2.244  | 0.000561033 | 0.002628736 | Ltbp4    | latent transforming growth factor beta binding protein 4                     | protein_coding | 108075    | -   |
| ENSMUSG00000040490 | 20.85  | 4.625 | 2.209  | 2.69972E-05 | 0.000227325 | Lrfn2    | leucine rich repeat and fibronectin type III domain containing 2             | protein_coding | 70530     | -   |
| ENSMUSG00000040532 | 16.43  | 0.241 | -2.055 | 0.002511707 | 0.008901944 | Abhd11   | abhydrolase domain containing 11                                             | protein_coding | 68758     | -   |
| ENSMUSG00000040592 | 269.27 | 0.007 | -7.173 | 7.78183E-46 | 1.39832E-41 | Cd79b    | CD79B antigen                                                                | protein_coding | 15985     | -   |
| ENSMUSG00000040612 | 9.04   | 4.639 | 2.214  | 0.003731493 | 0.012253507 | Ildr2    | immunoglobulin-like domain containing receptor 2                             | protein_coding | 100039795 | -   |
| ENSMUSG00000040614 | 5.49   | 6.071 | 2.602  | 0.000723409 | 0.003234372 | Nlrp9c   | NLR family, pyrin domain containing 9C                                       | protein_coding | 330490    | -   |
| ENSMUSG00000040620 | 11.01  | 0.07  | -3.829 | 1.82868E-07 | 3.70039E-06 | Dhx33    | DEAH (Asp-Glu-Ala-His) box polypeptide 33                                    | protein_coding | 216877    | -   |
| ENSMUSG00000040663 | 76.71  | 0.215 | -2.218 | 3.04792E-09 | 1.31971E-07 | Clef1    | cardiotrophin-like cytokine factor 1                                         | protein_coding | 56708     | -   |
| ENSMUSG00000040681 | 52.74  | 0.151 | -2.73  | 1.16227E-08 | 3.88195E-07 | Hmgn1    | high mobility group nucleosomal binding domain 1                             | protein_coding | 15312     | -   |
| ENSMUSG00000040693 | 16.12  | 4.076 | 2.027  | 0.000386399 | 0.001940526 | Slco4c1  | solute carrier organic anion transporter family, member 4C1                  | protein_coding | 227394    | -   |
| ENSMUSG00000040722 | 17.03  | 4.883 | 2.288  | 0.000925303 | 0.003953408 | Scamp5   | secretory carrier membrane protein 5                                         | protein_coding | 56807     | -   |
| ENSMUSG00000040732 | 17.16  | 4.114 | 2.041  | 7.19054E-05 | 0.000499447 | Erg      | ETS transcription factor                                                     | protein_coding | 13876     | ETS |
| ENSMUSG00000040751 | 62.74  | 0.134 | -2.904 | 2.88539E-12 | 3.43362E-10 | Lat2     | linker for activation of T cells family, member 2                            | protein_coding | 56743     | -   |
| ENSMUSG00000040752 | 11.31  | 6.519 | 2.705  | 3.65318E-05 | 0.000289435 | Myh6     | myosin, heavy polypeptide 6, cardiac muscle, alpha                           | protein_coding | 17888     | -   |
| ENSMUSG00000040794 | 10.95  | 6.895 | 2.786  | 6.1974E-05  | 0.000441557 | C1qtnf4  | C1q and tumor necrosis factor related protein 4                              | protein_coding | 67445     | -   |
| ENSMUSG00000040809 | 68.62  | 0.092 | -3.435 | 2.10095E-05 | 0.000185149 | Chil3    | chitinase-like 3                                                             | protein_coding | 12655     | -   |
| ENSMUSG00000040828 | 7.21   | 7.24  | 2.856  | 0.001829522 | 0.006902094 | Catsperd | cation channel sperm associated auxiliary subunit delta                      | protein_coding | 106757    | -   |
| ENSMUSG00000040852 | 92.05  | 5.04  | 2.333  | 0.002569627 | 0.009064315 | Plekh2   | pleckstrin homology domain containing, family H (with MyTH4 domain) member 2 | protein_coding | 213556    | -   |
| ENSMUSG00000040856 | 4.45   | 4.504 | 2.171  | 0.012045116 | 0.031434869 | Dlk1     | delta like non-canonical Notch ligand 1                                      | protein_coding | 13386     | -   |
| ENSMUSG00000040899 | 16.85  | 0.172 | -2.536 | 3.98216E-06 | 4.74191E-05 | Ccr6     | chemokine (C-C motif) receptor 6                                             | protein_coding | 12458     | -   |
| ENSMUSG00000040957 | 12.93  | 4.301 | 2.105  | 0.001050712 | 0.004396112 | Cables1  | CDK5 and Abl enzyme substrate 1                                              | protein_coding | 63955     | -   |
| ENSMUSG00000040969 | 9.01   | 5.229 | 2.387  | 0.003370372 | 0.011296495 | Arhgef38 | Rho guanine nucleotide exchange factor (GEF) 38                              | protein_coding | 77669     | -   |
| ENSMUSG00000040972 | 35.28  | 5.329 | 2.414  | 6.1287E-08  | 1.4882E-06  | Igsf21   | immunoglobulin superfamily, member 21                                        | protein_coding | 230868    | -   |



|                    |        |       |        |             |             |           |                                                                     |                |        |          |
|--------------------|--------|-------|--------|-------------|-------------|-----------|---------------------------------------------------------------------|----------------|--------|----------|
| ENSMUSG00000040998 | 6.12   | 4.033 | 2.012  | 0.006214478 | 0.018558743 | Npnt      | nephronectin                                                        | protein_coding | 114249 | -        |
| ENSMUSG00000041037 | 19.63  | 0.212 | -2.24  | 6.17177E-05 | 0.000440082 | Irgq      | immunity-related GTPase family, Q                                   | protein_coding | 210146 | -        |
| ENSMUSG00000041078 | 69.09  | 5.394 | 2.431  | 2.06333E-08 | 6.18964E-07 | Grid1     | glutamate receptor, ionotropic, delta 1                             | protein_coding | 14803  | -        |
| ENSMUSG00000041130 | 36.11  | 0.234 | -2.095 | 1.51693E-06 | 2.13618E-05 | Zfp598    | zinc finger protein 598                                             | protein_coding | 213753 | -        |
| ENSMUSG00000041193 | 8.04   | 5.93  | 2.568  | 3.85245E-05 | 0.000301632 | Pla2g5    | phospholipase A2, group V                                           | protein_coding | 18784  | -        |
| ENSMUSG00000041216 | 17.64  | 4.664 | 2.222  | 4.202E-05   | 0.000323781 | Clvs1     | clavesin 1                                                          | protein_coding | 74438  | -        |
| ENSMUSG00000041220 | 39.31  | 4.072 | 2.026  | 3.14062E-07 | 5.82397E-06 | Elov16    | ELOVL family member 6, elongation of long chain fatty acids (yeast) | protein_coding | 170439 | -        |
| ENSMUSG00000041309 | 11.41  | 4.268 | 2.094  | 0.00431001  | 0.013810016 | Nkx6-2    | NK6 homeobox 2                                                      | protein_coding | 14912  | Homeobox |
| ENSMUSG00000041360 | 20.97  | 0.21  | -2.255 | 2.90192E-05 | 0.000240298 | Pum3      | pumilio RNA-binding family member 3                                 | protein_coding | 52874  | -        |
| ENSMUSG00000041372 | 12     | 9.027 | 3.174  | 2.41117E-06 | 3.13052E-05 | B4galnt3  | beta-1,4-N-acetyl-galactosaminyl transferase 3                      | protein_coding | 330406 | -        |
| ENSMUSG00000041377 | 13.05  | 4.302 | 2.105  | 0.000814377 | 0.003569158 | Ninj2     | ninjurin 2                                                          | protein_coding | 29862  | -        |
| ENSMUSG00000041380 | 20.4   | 4.08  | 2.029  | 7.25373E-05 | 0.000502573 | Htr2c     | 5-hydroxytryptamine (serotonin) receptor 2C                         | protein_coding | 15560  | -        |
| ENSMUSG00000041396 | 5.7    | 0.093 | -3.433 | 8.21937E-05 | 0.000556076 | Mett18    | methyltransferase like 18                                           | protein_coding | 69962  | -        |
| ENSMUSG00000041444 | 16.39  | 5.532 | 2.468  | 7.23513E-06 | 7.67009E-05 | Arhgap32  | Rho GTPase activating protein 32                                    | protein_coding | 330914 | -        |
| ENSMUSG00000041481 | 12.85  | 0.115 | -3.123 | 0.000214175 | 0.001206355 | Serpina3g | serine (or cysteine) peptidase inhibitor, clade A, member 3G        | protein_coding | 20715  | -        |
| ENSMUSG00000041498 | 17.42  | 5.187 | 2.375  | 1.55312E-05 | 0.000144078 | Kif14     | kinesin family member 14                                            | protein_coding | 381293 | -        |
| ENSMUSG00000041506 | 22.41  | 0.137 | -2.865 | 6.60138E-08 | 1.58583E-06 | Rrp9      | RRP9, small subunit (SSU) processome component, homolog (yeast)     | protein_coding | 27966  | -        |
| ENSMUSG00000041515 | 120.6  | 0.08  | -3.636 | 5.68406E-21 | 3.40456E-18 | Irf8      | interferon regulatory factor 8                                      | protein_coding | 15900  | IRF      |
| ENSMUSG00000041538 | 168.61 | 0.017 | -5.902 | 1.53508E-27 | 1.97027E-24 | H2-Ob     | histocompatibility 2, O region beta locus                           | protein_coding | 15002  | -        |
| ENSMUSG00000041544 | 15.57  | 4.894 | 2.291  | 3.48291E-05 | 0.000279645 | Disp3     | dispatched RND transporter family member 3                          | protein_coding | 242748 | -        |
| ENSMUSG00000041560 | 375.51 | 0.247 | -2.02  | 2.23643E-09 | 1.02256E-07 | Nop53     | NOP53 ribosome biogenesis factor                                    | protein_coding | 68077  | -        |
| ENSMUSG00000041598 | 26.8   | 4.435 | 2.149  | 1.9979E-05  | 0.000177901 | Cdc42ep4  | CDC42 effector protein (Rho GTPase binding) 4                       | protein_coding | 56699  | -        |
| ENSMUSG00000041608 | 23.72  | 8.823 | 3.141  | 1.96335E-09 | 9.35793E-08 | Entpd3    | ectonucleoside triphosphate diphosphohydrolase 3                    | protein_coding | 215446 | -        |

|                        |        |        |        |             |             |          |                                                                         |                      |        |         |
|------------------------|--------|--------|--------|-------------|-------------|----------|-------------------------------------------------------------------------|----------------------|--------|---------|
| ENSMUSG00000<br>041617 | 7.11   | 4.453  | 2.155  | 0.012878863 | 0.033116813 | Ccdc74a  | coiled-coil domain containing 74A                                       | protein_coding       | 72315  | -       |
| ENSMUSG00000<br>041644 | 4.57   | 5.675  | 2.505  | 0.005112143 | 0.015833372 | Slc5a12  | solute carrier family 5<br>(sodium/glucose cotransporter),<br>member 12 | protein_coding       | 241612 | -       |
| ENSMUSG00000<br>041671 | 21.7   | 0.217  | -2.206 | 5.29992E-05 | 0.000390145 | Pyroxd1  | pyridine nucleotide-disulphide<br>oxidoreductase domain 1               | protein_coding       | 232491 | -       |
| ENSMUSG00000<br>041674 | 10.52  | 4.242  | 2.085  | 0.015749792 | 0.038845213 | BC006965 | cDNA sequence BC006965                                                  | processed_transcript | 217294 | -       |
| ENSMUSG00000<br>041695 | 43.59  | 4.198  | 2.07   | 9.73876E-08 | 2.18535E-06 | Kcnj2    | potassium inwardly-rectifying<br>channel, subfamily J, member 2         | protein_coding       | 16518  | -       |
| ENSMUSG00000<br>041708 | 15.88  | 6.28   | 2.651  | 3.36118E-07 | 6.16925E-06 | Mpped1   | metallophosphoesterase domain<br>containing 1                           | protein_coding       | 223726 | -       |
| ENSMUSG00000<br>041731 | 21.32  | 6.179  | 2.627  | 4.93237E-08 | 1.24131E-06 | Pgm5     | phosphoglucomutase 5                                                    | protein_coding       | 226041 | -       |
| ENSMUSG00000<br>041733 | 11.67  | 0.227  | -2.139 | 0.001379682 | 0.005481208 | Coq5     | coenzyme Q5 methyltransferase                                           | protein_coding       | 52064  | -       |
| ENSMUSG00000<br>041734 | 24.71  | 10.735 | 3.424  | 1.67592E-07 | 3.42211E-06 | Kirrel   | kirre like nephrin family adhesion<br>molecule 1                        | protein_coding       | 170643 | -       |
| ENSMUSG00000<br>041737 | 3.65   | 7.499  | 2.907  | 0.000758511 | 0.003359546 | Tmem45b  | transmembrane protein 45b                                               | protein_coding       | 235135 | -       |
| ENSMUSG00000<br>041741 | 18.85  | 4.487  | 2.166  | 5.87704E-05 | 0.000423745 | Pde3a    | phosphodiesterase 3A, cGMP<br>inhibited                                 | protein_coding       | 54611  | -       |
| ENSMUSG00000<br>041765 | 204.66 | 0.247  | -2.018 | 3.24732E-06 | 3.99119E-05 | Ubac2    | ubiquitin associated domain<br>containing 2                             | protein_coding       | 68889  | -       |
| ENSMUSG00000<br>041782 | 3.94   | 4.761  | 2.251  | 0.013665764 | 0.034649373 | Lad1     | ladinin                                                                 | protein_coding       | 16763  | -       |
| ENSMUSG00000<br>041801 | 72.62  | 9.077  | 3.182  | 2.19677E-10 | 1.37062E-08 | Phlda3   | pleckstrin homology like domain,<br>family A, member 3                  | protein_coding       | 27280  | -       |
| ENSMUSG00000<br>041886 | 13.41  | 5.064  | 2.34   | 0.00020413  | 0.001160396 | Macc1    | metastasis associated in colon cancer<br>1                              | protein_coding       | 238455 | -       |
| ENSMUSG00000<br>041907 | 8.84   | 6.602  | 2.723  | 0.001869295 | 0.007015323 | Gpr45    | G protein-coupled receptor 45                                           | protein_coding       | 93690  | -       |
| ENSMUSG00000<br>041957 | 6.78   | 5.047  | 2.335  | 0.006163971 | 0.018444696 | Pkp2     | plakophilin 2                                                           | protein_coding       | 67451  | -       |
| ENSMUSG00000<br>041986 | 7.09   | 6.645  | 2.732  | 0.016133533 | 0.039566646 | Elmod1   | ELMO/CED-12 domain containing 1                                         | protein_coding       | 270162 | -       |
| ENSMUSG00000<br>042063 | 19.87  | 0.182  | -2.46  | 0.00011272  | 0.000719016 | Zfp386   | zinc finger protein 386 (Kruppel-<br>like)                              | protein_coding       | 56220  | zf-C2H2 |
| ENSMUSG00000<br>042104 | 17.45  | 5.931  | 2.568  | 0.000103313 | 0.000671403 | Uggt2    | UDP-glucose glycoprotein<br>glucosyltransferase 2                       | protein_coding       | 66435  | -       |
| ENSMUSG00000<br>042111 | 21.26  | 0.185  | -2.433 | 6.3159E-06  | 6.87404E-05 | Ccdc115  | coiled-coil domain containing 115                                       | protein_coding       | 69668  | -       |
| ENSMUSG00000<br>042213 | 47.71  | 6.093  | 2.607  | 8.11734E-08 | 1.86909E-06 | Zfand4   | zinc finger, AN1-type domain 4                                          | protein_coding       | 67492  | -       |
| ENSMUSG00000<br>042216 | 10.98  | 4.306  | 2.106  | 0.00023171  | 0.001287445 | Sgsm1    | small G protein signaling modulator<br>1                                | protein_coding       | 52850  | -       |
| ENSMUSG00000<br>042265 | 104.01 | 4.33   | 2.114  | 5.9929E-11  | 4.66175E-09 | Trem1    | triggering receptor expressed on<br>myeloid cells 1                     | protein_coding       | 58217  | -       |

|                        |        |       |        |             |             |                   |                                                                    |                |               |         |
|------------------------|--------|-------|--------|-------------|-------------|-------------------|--------------------------------------------------------------------|----------------|---------------|---------|
| ENSMUSG00000<br>042286 | 11.63  | 7.397 | 2.887  | 0.000238497 | 0.00131504  | Stab1             | stabilin 1                                                         | protein_coding | 192187        | -       |
| ENSMUSG00000<br>042401 | 14.17  | 4.488 | 2.166  | 0.000725385 | 0.003239982 | Crtac1            | cartilage acidic protein 1                                         | protein_coding | 72832         | -       |
| ENSMUSG00000<br>042474 | 105.28 | 0.018 | -5.804 | 1.27412E-28 | 2.07289E-25 | Fcmmr             | Fc fragment of IgM receptor                                        | protein_coding | 69169         | -       |
| ENSMUSG00000<br>042477 | 6.29   | 5.263 | 2.396  | 0.004776181 | 0.014972159 | Tfap2e            | transcription factor AP-2, epsilon                                 | protein_coding | 332937        | AP-2    |
| ENSMUSG00000<br>042529 | 8.12   | 6.544 | 2.71   | 0.003934478 | 0.012800767 | Kcnj12            | potassium inwardly-rectifying channel, subfamily J, member 12      | protein_coding | 16515         | -       |
| ENSMUSG00000<br>042540 | 9.14   | 4.491 | 2.167  | 0.002607354 | 0.009168601 | Acot5             | acyl-CoA thioesterase 5                                            | protein_coding | 217698        | -       |
| ENSMUSG00000<br>042567 | 24.48  | 4.355 | 2.123  | 0.000113204 | 0.000719959 | Nek10             | NIMA (never in mitosis gene a)-related kinase 10                   | protein_coding | 674895        | -       |
| ENSMUSG00000<br>042579 | 7.36   | 0.141 | -2.825 | 0.000889786 | 0.00383327  | 4632404H12R<br>ik | RIKEN cDNA 4632404H12 gene                                         | lincRNA        | 74034         | -       |
| ENSMUSG00000<br>042590 | 397.89 | 4.996 | 2.321  | 8.33412E-10 | 4.34075E-08 | Ipo11             | importin 11                                                        | protein_coding | 76582         | -       |
| ENSMUSG00000<br>042686 | 21.4   | 4.29  | 2.101  | 0.001865639 | 0.007006091 | Jph1              | junctophilin 1                                                     | protein_coding | 57339         | -       |
| ENSMUSG00000<br>042699 | 43.76  | 0.174 | -2.524 | 2.2577E-07  | 4.43373E-06 | Dhx9              | DEAH (Asp-Glu-Ala-His) box polypeptide 9                           | protein_coding | 13211         | -       |
| ENSMUSG00000<br>042729 | 14.97  | 0.139 | -2.852 | 2.1064E-06  | 2.79748E-05 | Wdr74             | WD repeat domain 74                                                | protein_coding | 107071        | -       |
| ENSMUSG00000<br>042734 | 36.9   | 0.139 | -2.852 | 0.000252113 | 0.001376546 | Ttc9              | tetratricopeptide repeat domain 9                                  | protein_coding | 69480         | -       |
| ENSMUSG00000<br>042737 | 23.87  | 0.202 | -2.311 | 2.82594E-05 | 0.000235416 | Dpm3              | dolichyl-phosphate mannosyltransferase polypeptide 3               | protein_coding | 68563         | -       |
| ENSMUSG00000<br>042747 | 30.18  | 0.164 | -2.612 | 4.22303E-08 | 1.09658E-06 | Krtcap2           | keratinocyte associated protein 2                                  | protein_coding | 66059         | -       |
| ENSMUSG00000<br>042831 | 12.52  | 0.122 | -3.031 | 4.29618E-06 | 5.03247E-05 | Alkbh6            | alkB homolog 6                                                     | protein_coding | 233065        | -       |
| ENSMUSG00000<br>042846 | 14.6   | 6.502 | 2.701  | 8.08847E-05 | 0.000549288 | Lrrtm3            | leucine rich repeat transmembrane neuronal 3                       | protein_coding | 216028        | -       |
| ENSMUSG00000<br>042961 | 15.64  | 4.448 | 2.153  | 0.001288767 | 0.005191178 | Egflam            | EGF-like, fibronectin type III and laminin G domains               | protein_coding | 268780        | -       |
| ENSMUSG00000<br>042978 | 152.85 | 0.115 | -3.115 | 7.95841E-12 | 8.31423E-10 | Sbk1              | SH3-binding kinase 1                                               | protein_coding | 104175        | -       |
| ENSMUSG00000<br>043029 | 5.52   | 7.327 | 2.873  | 0.000450094 | 0.002207355 | Trpv3             | transient receptor potential cation channel, subfamily V, member 3 | protein_coding | 246788        | -       |
| ENSMUSG00000<br>043061 | 16.55  | 0.089 | -3.493 | 1.29035E-08 | 4.23882E-07 | Tmem18            | transmembrane protein 18                                           | protein_coding | 211986        | -       |
| ENSMUSG00000<br>043090 | 29.04  | 0.216 | -2.208 | 1.60354E-07 | 3.30437E-06 | Zfp866            | zinc finger protein 866                                            | protein_coding | 330788        | zf-C2H2 |
| ENSMUSG00000<br>043140 | 15.44  | 0.034 | -4.876 | 9.09973E-11 | 6.70135E-09 | Tmem186           | transmembrane protein 186                                          | protein_coding | 66690         | -       |
| ENSMUSG00000<br>043243 | 32.51  | 0.116 | -3.111 | 2.26015E-11 | 2.03063E-09 | Fam129c           | family with sequence similarity 129, member C                      | protein_coding | 100037<br>278 | -       |

|                   |       |       |        |             |             |               |                                                                         |                      |        |         |
|-------------------|-------|-------|--------|-------------|-------------|---------------|-------------------------------------------------------------------------|----------------------|--------|---------|
| ENSMUSG0000043252 | 35.79 | 0.231 | -2.111 | 5.55745E-06 | 6.21804E-05 | Tmem64        | transmembrane protein 64                                                | protein_coding       | 100201 | -       |
| ENSMUSG0000043259 | 18.24 | 6.279 | 2.65   | 1.35482E-05 | 0.000128876 | Fam13c        | family with sequence similarity 13, member C                            | protein_coding       | 71721  | -       |
| ENSMUSG0000043263 | 90.81 | 0.09  | -3.471 | 1.75599E-11 | 1.65201E-09 | Ifi209        | interferon activated gene 209                                           | protein_coding       | 236312 | -       |
| ENSMUSG0000043290 | 8.18  | 0.204 | -2.294 | 0.000717507 | 0.00321198  | Zfp784        | zinc finger protein 784                                                 | protein_coding       | 654801 | zf-C2H2 |
| ENSMUSG0000043300 | 6.76  | 4.278 | 2.097  | 0.013042948 | 0.033395373 | B3galnt1      | UDP-GalNAc:betaGlcNAc beta 1,3-galactosaminyltransferase, polypeptide 1 | protein_coding       | 26879  | -       |
| ENSMUSG0000043391 | 22.26 | 4.163 | 2.058  | 0.000207751 | 0.001177917 | 2510009E07Rik | RIKEN cDNA 2510009E07 gene                                              | protein_coding       | 72190  | -       |
| ENSMUSG0000043456 | 43.83 | 5.375 | 2.426  | 4.55105E-05 | 0.000346663 | Zfp536        | zinc finger protein 536                                                 | protein_coding       | 243937 | zf-C2H2 |
| ENSMUSG0000043461 | 4.27  | 4.071 | 2.026  | 0.007898913 | 0.022436858 | Sptssb        | serine palmitoyltransferase, small subunit B                            | protein_coding       | 66183  | -       |
| ENSMUSG0000043483 | 28.48 | 0.052 | -4.259 | 2.48654E-15 | 6.76981E-13 | Gm6863        | -                                                                       | processed_pseudogene | -      | -       |
| ENSMUSG0000043518 | 12.8  | 4.959 | 2.31   | 0.001688741 | 0.00646739  | Rai2          | retinoic acid induced 2                                                 | protein_coding       | 24004  | -       |
| ENSMUSG0000043639 | 27.01 | 4.052 | 2.019  | 5.54286E-05 | 0.000404548 | Rbm20         | RNA binding motif protein 20                                            | protein_coding       | 73713  | -       |
| ENSMUSG0000043659 | 17.12 | 5.023 | 2.329  | 0.000136202 | 0.000840459 | Npsr1         | neuropeptide S receptor 1                                               | protein_coding       | 319239 | -       |
| ENSMUSG0000043668 | 18.39 | 4.634 | 2.212  | 0.000234553 | 0.001298806 | Tox3          | TOX high mobility group box family member 3                             | protein_coding       | 244579 | HMG     |
| ENSMUSG0000043683 | 44.07 | 0.22  | -2.187 | 5.6566E-09  | 2.19059E-07 | Fem1a         | feminization 1 homolog a (C. elegans)                                   | protein_coding       | 14154  | -       |
| ENSMUSG0000043705 | 15.79 | 4.693 | 2.231  | 0.00017381  | 0.001017659 | Capn13        | calpain 13                                                              | protein_coding       | 381122 | -       |
| ENSMUSG0000043719 | 14.96 | 4.291 | 2.101  | 3.56406E-05 | 0.000284634 | Col6a6        | collagen, type VI, alpha 6                                              | protein_coding       | 245026 | -       |
| ENSMUSG0000043789 | 4.69  | 5.278 | 2.4    | 0.010043025 | 0.027194561 | Vwce          | von Willebrand factor C and EGF domains                                 | protein_coding       | 71768  | -       |
| ENSMUSG0000043843 | 3.65  | 5.892 | 2.559  | 0.006543756 | 0.019311012 | Tmem145       | transmembrane protein 145                                               | protein_coding       | 330485 | -       |
| ENSMUSG0000043913 | 27.35 | 5.765 | 2.527  | 6.06363E-08 | 1.47839E-06 | Ccdc60        | coiled-coil domain containing 60                                        | protein_coding       | 269693 | -       |
| ENSMUSG0000043924 | 14.53 | 0.214 | -2.221 | 0.007520868 | 0.021595156 | Ncmap         | noncompact myelin associated protein                                    | protein_coding       | 230822 | -       |
| ENSMUSG0000043931 | 30.95 | 0.09  | -3.469 | 3.21294E-09 | 1.36809E-07 | Gimap7        | GTPase, IMAP family member 7                                            | protein_coding       | 231932 | -       |
| ENSMUSG0000043940 | 53.47 | 4.46  | 2.157  | 3.10956E-07 | 5.78449E-06 | Wdfy3         | WD repeat and FYVE domain containing 3                                  | protein_coding       | 72145  | -       |
| ENSMUSG0000043953 | 24.33 | 4.433 | 2.148  | 1.00146E-06 | 1.51348E-05 | Ccr2          | chemokine (C-C motif) receptor-like 2                                   | protein_coding       | 54199  | -       |
| ENSMUSG0000044037 | 79.72 | 0.152 | -2.72  | 1.15485E-13 | 2.26046E-11 | Als2cl        | ALS2 C-terminal like                                                    | protein_coding       | 235633 | -       |

|                    |          |        |        |             |             |               |                                                              |                      |        |   |
|--------------------|----------|--------|--------|-------------|-------------|---------------|--------------------------------------------------------------|----------------------|--------|---|
| ENSMUSG00000044042 | 26.02    | 4.06   | 2.021  | 2.14863E-05 | 0.000188152 | Fmn1          | formin 1                                                     | protein_coding       | 14260  | - |
| ENSMUSG00000044052 | 3.49     | 0.018  | -5.805 | 7.17203E-05 | 0.000498422 | Ccr10         | chemokine (C-C motif) receptor 10                            | protein_coding       | 12777  | - |
| ENSMUSG00000044080 | 645.95   | 5.644  | 2.497  | 7.89414E-08 | 1.83505E-06 | S100a1        | S100 calcium binding protein A1                              | protein_coding       | 20193  | - |
| ENSMUSG00000044122 | 7.53     | 5.921  | 2.566  | 0.00388413  | 0.012671374 | Proca1        | protein interacting with cyclin A1                           | protein_coding       | 216974 | - |
| ENSMUSG00000044155 | 13.41    | 0.114  | -3.134 | 1.96434E-07 | 3.93942E-06 | Lsm8          | LSM8 homolog, U6 small nuclear RNA associated                | protein_coding       | 76522  | - |
| ENSMUSG00000044199 | 155.54   | 0.188  | -2.412 | 1.18486E-12 | 1.67643E-10 | S1pr4         | sphingosine-1-phosphate receptor 4                           | protein_coding       | 13611  | - |
| ENSMUSG00000044216 | 5.02     | 7.44   | 2.895  | 0.000287713 | 0.00152775  | Kcnj4         | potassium inwardly-rectifying channel, subfamily J, member 4 | protein_coding       | 16520  | - |
| ENSMUSG00000044252 | 23.96    | 4.477  | 2.163  | 6.13682E-05 | 0.000438633 | Osbp1a        | oxysterol binding protein-like 1A                            | protein_coding       | 64291  | - |
| ENSMUSG00000044258 | 13194.53 | 4.652  | 2.218  | 5.53761E-05 | 0.000404548 | Ctla2a        | cytotoxic T lymphocyte-associated protein 2 alpha            | protein_coding       | 13024  | - |
| ENSMUSG00000044288 | 5.86     | 10.594 | 3.405  | 0.001030232 | 0.004325288 | Cnr1          | cannabinoid receptor 1 (brain)                               | protein_coding       | 12801  | - |
| ENSMUSG00000044365 | 6.47     | 4.609  | 2.204  | 0.002245375 | 0.008154232 | Cxxc4         | CXXC finger 4                                                | protein_coding       | 319478 | - |
| ENSMUSG00000044393 | 4.71     | 4.066  | 2.024  | 0.006553236 | 0.019332638 | Dsg2          | desmoglein 2                                                 | protein_coding       | 13511  | - |
| ENSMUSG00000044576 | 6.97     | 9.025  | 3.174  | 0.000250513 | 0.001369061 | Garem2        | GRB2 associated regulator of MAPK1 subtype 2                 | protein_coding       | 242915 | - |
| ENSMUSG00000044609 | 4.01     | 0.139  | -2.844 | 0.005101109 | 0.015817218 | Gm9294        | -                                                            | processed_pseudogene | -      | - |
| ENSMUSG00000044730 | 9.39     | 0.113  | -3.148 | 1.45838E-05 | 0.000136981 | 9930104L06Rik | RIKEN cDNA 9930104L06 gene                                   | processed_transcript | 194268 | - |
| ENSMUSG00000044734 | 64.01    | 0.084  | -3.568 | 9.56289E-16 | 2.86393E-13 | Serpib1a      | serine (or cysteine) peptidase inhibitor, clade B, member 1a | protein_coding       | 66222  | - |
| ENSMUSG00000044763 | 18.31    | 0.084  | -3.575 | 3.639E-09   | 1.5032E-07  | Trmt10c       | tRNA methyltransferase 10C                                   | protein_coding       | 52575  | - |
| ENSMUSG00000044867 | 46.92    | 0.2    | -2.319 | 4.08337E-08 | 1.07272E-06 | Gimap1os      | -                                                            | processed_transcript | -      | - |
| ENSMUSG00000044997 | 8.3      | 5.666  | 2.502  | 0.004359722 | 0.013927085 | E130304I02Rik | RIKEN cDNA E130304I02 gene                                   | antisense_RNA        | 78547  | - |
| ENSMUSG00000045004 | 8.2      | 8.703  | 3.122  | 0.000104159 | 0.000676414 | Spat21        | spermatogenesis associated 21                                | protein_coding       | 329972 | - |
| ENSMUSG00000045039 | 10.11    | 4.212  | 2.074  | 0.002129497 | 0.007812359 | Megf8         | multiple EGF-like-domains 8                                  | protein_coding       | 269878 | - |
| ENSMUSG00000045055 | 100.17   | 0.147  | -2.763 | 7.76341E-15 | 2.02175E-12 | Rpsa-ps2      | -                                                            | processed_pseudogene | -      | - |
| ENSMUSG00000045075 | 5.99     | 13.077 | 3.709  | 7.80361E-06 | 8.16675E-05 | Gm9796        | -                                                            | lincRNA              | -      | - |
| ENSMUSG00000045092 | 169.77   | 0.15   | -2.735 | 1.32133E-13 | 2.47323E-11 | S1pr1         | sphingosine-1-phosphate receptor 1                           | protein_coding       | 13609  | - |

|                    |         |        |        |             |             |               |                                                                               |                                    |        |         |
|--------------------|---------|--------|--------|-------------|-------------|---------------|-------------------------------------------------------------------------------|------------------------------------|--------|---------|
| ENSMUSG00000045095 | 65.11   | 4.512  | 2.174  | 1.5015E-07  | 3.14092E-06 | Magi1         | membrane associated guanylate kinase, WW and PDZ domain containing 1          | protein_coding                     | 14924  | -       |
| ENSMUSG00000045106 | 84.73   | 0.197  | -2.341 | 5.8131E-12  | 6.33065E-10 | Ccdc73        | coiled-coil domain containing 73                                              | protein_coding                     | 211936 | -       |
| ENSMUSG00000045132 | 3050.51 | 9.696  | 3.277  | 0.01015754  | 0.027446742 | Olfir620      | olfactory receptor 620                                                        | protein_coding                     | 258808 | -       |
| ENSMUSG00000045180 | 14.41   | 4.514  | 2.175  | 0.00019146  | 0.001102677 | Shroom2       | shroom family member 2                                                        | protein_coding                     | 110380 | -       |
| ENSMUSG00000045201 | 12.48   | 8.461  | 3.081  | 3.89511E-05 | 0.00030431  | Lrrc3b        | leucine rich repeat containing 3B                                             | protein_coding                     | 218763 | -       |
| ENSMUSG00000045215 | 14.09   | 5.93   | 2.568  | 0.00038695  | 0.001942751 | Asxl3         | additional sex combs like 3, transcriptional regulator                        | protein_coding                     | 211961 | -       |
| ENSMUSG00000045238 | 5.57    | 24.928 | 4.64   | 2.41306E-06 | 3.13071E-05 | A730035I17Rik | -                                                                             | antisense_RNA                      | -      | -       |
| ENSMUSG00000045294 | 14.46   | 0.072  | -3.801 | 2.30142E-08 | 6.73521E-07 | Insig1        | insulin induced gene 1                                                        | protein_coding                     | 231070 | -       |
| ENSMUSG00000045319 | 65.91   | 5.458  | 2.448  | 8.58999E-07 | 1.33408E-05 | Proser2       | proline and serine rich 2                                                     | protein_coding                     | 227545 | -       |
| ENSMUSG00000045328 | 5.98    | 5.134  | 2.36   | 0.002828508 | 0.009791073 | Cenpe         | centromere protein E                                                          | protein_coding                     | 229841 | -       |
| ENSMUSG00000045411 | 31.4    | 0.137  | -2.869 | 2.47687E-10 | 1.51384E-08 | 2410002F23Rik | RIKEN cDNA 2410002F23 gene                                                    | protein_coding                     | 668661 | -       |
| ENSMUSG00000045463 | 6.74    | 5.77   | 2.528  | 0.004345638 | 0.01388703  | Slco6b1       | solute carrier organic anion transporter family, member 6b1                   | transcribed_unprocessed_pseudogene | 67854  | -       |
| ENSMUSG00000045466 | 15.61   | 0.247  | -2.019 | 0.003143515 | 0.010671797 | Zfp956        | zinc finger protein 956                                                       | protein_coding                     | 101197 | zf-C2H2 |
| ENSMUSG00000045551 | 42.98   | 5.932  | 2.568  | 2.56399E-09 | 1.1547E-07  | Fpr1          | formyl peptide receptor 1                                                     | protein_coding                     | 14293  | -       |
| ENSMUSG00000045744 | 7.17    | 0.076  | -3.726 | 5.46667E-05 | 0.000401105 | Bricd5        | BRICHOS domain containing 5                                                   | protein_coding                     | 319259 | -       |
| ENSMUSG00000045757 | 10.81   | 0.05   | -4.317 | 5.38921E-07 | 9.13749E-06 | Zfp764        | zinc finger protein 764                                                       | protein_coding                     | 233893 | zf-C2H2 |
| ENSMUSG00000045761 | 6.22    | 4.045  | 2.016  | 0.004384052 | 0.013990325 | Togaram2      | TOG array regulator of axonemal microtubules 2                                | protein_coding                     | 320159 | -       |
| ENSMUSG00000045775 | 9.73    | 0.109  | -3.198 | 1.06698E-05 | 0.000105402 | Slc16a5       | solute carrier family 16 (monocarboxylic acid transporters), member 5         | protein_coding                     | 217316 | -       |
| ENSMUSG00000045780 | 3036.69 | 9.947  | 3.314  | 0.019466558 | 0.046090753 | Olfir624      | olfactory receptor 624                                                        | protein_coding                     | 258189 | -       |
| ENSMUSG00000045799 | 50.5    | 0.154  | -2.694 | 2.61739E-12 | 3.22137E-10 | Gm9800        | -                                                                             | processed_pseudogene               | -      | -       |
| ENSMUSG00000045802 | 11.75   | 5.678  | 2.505  | 0.002181431 | 0.007968722 | Hsf3          | heat shock transcription factor 3                                             | protein_coding                     | 245525 | HSF     |
| ENSMUSG00000045826 | 210.12  | 0.107  | -3.23  | 2.30728E-20 | 1.29561E-17 | Ptprcap       | protein tyrosine phosphatase, receptor type, C polypeptide-associated protein | protein_coding                     | 19265  | -       |

|                        |        |        |        |             |                        |                                                                  |                                                             |                          |               |         |
|------------------------|--------|--------|--------|-------------|------------------------|------------------------------------------------------------------|-------------------------------------------------------------|--------------------------|---------------|---------|
| ENSMUSG00000<br>045838 | 4.6    | 9.314  | 3.219  | 0.003027535 | 0.010350413            | A430105119R<br>ik                                                | coiled-coil domain containing 9B                            | protein_coding           | 214239        | -       |
| ENSMUSG00000<br>045875 | 12.15  | 4.233  | 2.082  | 0.000598813 | 0.002776077            | Adra1a                                                           | adrenergic receptor, alpha 1a                               | protein_coding           | 11549         | -       |
| ENSMUSG00000<br>046031 | 15.72  | 0.102  | -3.294 | 1.92032E-06 | 2.59337E-05            | Fam26f                                                           | calcium homeostasis modulator<br>family member 6            | protein_coding           | 215900        | -       |
| ENSMUSG00000<br>046159 | 56.17  | 4.257  | 2.09   | 2.86209E-08 | 7.99518E-07            | Chrm3                                                            | cholinergic receptor, muscarinic 3,<br>cardiac              | protein_coding           | 12671         | -       |
| ENSMUSG00000<br>046321 | 10.39  | 4.037  | 2.013  | 0.002249483 | 0.008165369            | Hs3st2                                                           | heparan sulfate (glucosamine) 3-O-<br>sulfotransferase 2    | protein_coding           | 195646        | -       |
| ENSMUSG00000<br>046337 | 19.77  | 4.821  | 2.269  | 4.85211E-05 | 0.000364801            | Fam178b                                                          | family with sequence similarity 178,<br>member B            | protein_coding           | 381337        | -       |
| ENSMUSG00000<br>046351 | 9.68   | 0.239  | -2.064 | 0.013876519 | 0.035035432            | Zfp322a                                                          | zinc finger protein 322A                                    | protein_coding           | 218100        | zf-C2H2 |
| ENSMUSG00000<br>046434 | 141.85 | 0.177  | -2.5   | 4.31989E-14 | 9.3523E-12             | Hnrmpa1                                                          | heterogeneous nuclear<br>ribonucleoprotein A1               | protein_coding           | 15382         | -       |
| ENSMUSG00000<br>046463 | 7.7    | 4.216  | 2.076  | 0.013048077 | 0.033403746            | 5930403N24R<br>ik                                                | -                                                           | processed_transc<br>ript | -             | -       |
| ENSMUSG00000<br>046561 | 7.43   | 6.91   | 2.789  | 0.00039017  | 0.001957824            | Arsj                                                             | arylsulfatase J                                             | protein_coding           | 271970        | -       |
| ENSMUSG00000<br>046572 | 7.77   | 6.918  | 2.79   | 0.000119424 | 0.00075164             | Zfp518b                                                          | zinc finger protein 518B                                    | protein_coding           | 100515        | -       |
| ENSMUSG00000<br>046585 | 17.48  | 6.955  | 2.798  | 2.76409E-08 | 7.83407E-07            | Cfap58                                                           | cilia and flagella associated protein<br>58                 | protein_coding           | 381229        | -       |
| ENSMUSG00000<br>046591 | 5.92   | 6.835  | 2.773  | 0.002564275 | 0.009052547            | Ticrr                                                            | TOPBP1-interacting checkpoint and<br>replication regulator  | protein_coding           | 77011         | -       |
| ENSMUSG00000<br>046607 | 7.14   | 4.719  | 2.239  | 0.006369789 | 0.0179aladin<br>79iHrk | harakiri, BCL2 interacting protein<br>(contains only BH3 domain) | protein_coding                                              | 12123                    | -             | -       |
| ENSMUSG00000<br>046613 | 5.85   | 4.896  | 2.292  | 0.009096094 | 0.025139159            | Vwa5b2                                                           | von Willebrand factor A domain<br>containing 5B2            | protein_coding           | 328643        | -       |
| ENSMUSG00000<br>046637 | 6.42   | 28.213 | 4.818  | 1.45695E-07 | 3.06796E-06            | Ttc34                                                            | tetratricopeptide repeat domain 34                          | protein_coding           | 242800        | -       |
| ENSMUSG00000<br>046675 | 10.18  | 0.102  | -3.298 | 2.03401E-06 | 2.71136E-05            | Tmem251                                                          | transmembrane protein 251                                   | protein_coding           | 320351        | -       |
| ENSMUSG00000<br>046688 | 42.36  | 0.22   | -2.182 | 3.13955E-07 | 5.82397E-06            | Tifa                                                             | TRAF-interacting protein with<br>forkhead-associated domain | protein_coding           | 211550        | -       |
| ENSMUSG00000<br>046721 | 24.5   | 0.164  | -2.608 | 1.9407E-06  | 2.61412E-05            | Rpl14-ps1                                                        | ribosomal protein L14, pseudogene 1                         | processed_pseud<br>ogene | 100040<br>970 | -       |
| ENSMUSG00000<br>046743 | 15.2   | 4.617  | 2.207  | 9.89582E-06 | 9.86814E-05            | Fat4                                                             | FAT atypical cadherin 4                                     | protein_coding           | 329628        | -       |
| ENSMUSG00000<br>046761 | 9.13   | 4.075  | 2.027  | 0.007964087 | 0.022579155            | Fam83h                                                           | family with sequence similarity 83,<br>member H             | protein_coding           | 105732        | -       |
| ENSMUSG00000<br>046768 | 69.96  | 4.11   | 2.039  | 1.62891E-05 | 0.000149948            | Rhoj                                                             | ras homolog family member J                                 | protein_coding           | 80837         | -       |
| ENSMUSG00000<br>046794 | 36.35  | 5.235  | 2.388  | 3.72205E-10 | 2.11651E-08            | Ppp1r3b                                                          | protein phosphatase 1, regulatory<br>subunit 3B             | protein_coding           | 244416        | -       |
| ENSMUSG00000<br>046806 | 458.38 | 4.177  | 2.063  | 1.08819E-06 | 1.62003E-05            | 3110062M04<br>Rik                                                | cell cycle regulator of NHEJ                                | protein_coding           | 78412         | -       |

|                    |        |       |        |             |              |               |                                                                                        |                      |        |         |
|--------------------|--------|-------|--------|-------------|--------------|---------------|----------------------------------------------------------------------------------------|----------------------|--------|---------|
| ENSMUSG00000046814 | 621.32 | 5.938 | 2.57   | 1.99849E-10 | 1.26447E-08  | Gchfr         | GTP cyclohydrolase I feedback regulator                                                | protein_coding       | 320415 | -       |
| ENSMUSG00000046865 | 46.45  | 0.231 | -2.113 | 9.71315E-07 | 1.47911E-05  | Fbl           | fibrillarlin                                                                           | protein_coding       | 14113  | -       |
| ENSMUSG00000046916 | 210.07 | 5.739 | 2.521  | 7.45101E-11 | 5.67318E-09  | Myct1         | myc target 1                                                                           | protein_coding       | 68632  | -       |
| ENSMUSG00000046959 | 8.09   | 6.74  | 2.753  | 1.81818E-05 | 0.000164589  | Slc26a1       | solute carrier family 26 (sulfate transporter), member 1                               | protein_coding       | 231583 | -       |
| ENSMUSG00000047013 | 13.18  | 7.427 | 2.893  | 9.56194E-05 | 0.000629372  | Fbxo41        | F-box protein 41                                                                       | protein_coding       | 330369 | -       |
| ENSMUSG00000047036 | 49.55  | 0.119 | -3.073 | 1.10302E-11 | 1.1135E-09   | Zfp445        | zinc finger protein 445                                                                | protein_coding       | 235682 | zf-C2H2 |
| ENSMUSG00000047123 | 12.49  | 0.15  | -2.738 | 6.42697E-05 | 0.000455387  | Ticam1        | toll-like receptor adaptor molecule 1                                                  | protein_coding       | 106759 | -       |
| ENSMUSG00000047129 | 11.15  | 4.097 | 2.035  | 0.008164559 | 0.02303485   | 1700113H08Rik | RIKEN cDNA 1700113H08 gene                                                             | protein_coding       | 76640  | -       |
| ENSMUSG00000047250 | 53.72  | 7.357 | 2.879  | 1.16939E-11 | 1.15454E-09  | Ptgs1         | prostaglandin-endoperoxide synthase 1                                                  | protein_coding       | 19224  | -       |
| ENSMUSG00000047324 | 6.39   | 6.457 | 2.691  | 0.006558962 | 0.019346353  | 4931429P17Rik | RIKEN cDNA 4931429P17 gene                                                             | lincRNA              | 70971  | -       |
| ENSMUSG00000047409 | 55.15  | 4.888 | 2.289  | 8.03805E-09 | 2.87721E-07  | Ctdspl        | CTD (carboxy-terminal domain, RNA polymerase II, polypeptide A) small phosphatase-like | protein_coding       | 69274  | -       |
| ENSMUSG00000047420 | 6.16   | 7.301 | 2.868  | 0.000427313 | 0.00211293   | Fam180a       | family with sequence similarity 180, member A                                          | protein_coding       | 208164 | -       |
| ENSMUSG00000047441 | 4.37   | 5.211 | 2.382  | 0.013074335 | 0.033442381  | Antxrl        | anthrax toxin receptor-like                                                            | protein_coding       | 239029 | -       |
| ENSMUSG00000047591 | 9.36   | 4.962 | 2.311  | 0.004163113 | 0.013418292  | Mafa          | v-maf musculoaponeurotic fibrosarcoma oncogene family, protein A (avian)               | protein_coding       | 378435 | TF_bZIP |
| ENSMUSG00000047613 | 12.81  | 0.161 | -2.632 | 2.11428E-05 | 0.000186142  | A430005L14Rik | RIKEN cDNA A430005L14 gene                                                             | protein_coding       | 97159  | -       |
| ENSMUSG00000047636 | 8.42   | 5.61  | 2.488  | 0.000924826 | 0.003952949  | Cdcp2         | CUB domain containing protein 2                                                        | protein_coding       | 242603 | -       |
| ENSMUSG00000047676 | 91.96  | 0.164 | -2.613 | 3.03419E-13 | 5.09545E-11  | Rpsa-ps10     | -                                                                                      | processed_pseudogene | -      | -       |
| ENSMUSG00000047694 | 11.47  | 0.165 | -2.598 | 0.000151911 | 0.000916616  | Yipf6         | Yip1 domain family, member 6                                                           | protein_coding       | 77929  | -       |
| ENSMUSG00000047721 | 64.01  | 0.244 | -2.034 | 1.60863E-08 | 5.018380ala7 | Bola2         | bolA-like 2 (E. coli)                                                                  | protein_coding       | 66162  | -       |
| ENSMUSG00000047747 | 20.64  | 4.484 | 2.165  | 0.00011373  | 0.000721869  | Rnf150        | ring finger protein 150                                                                | protein_coding       | 330812 | -       |
| ENSMUSG00000047766 | 9.84   | 5.262 | 2.396  | 0.000191802 | 0.001103763  | Lrrc49        | leucine rich repeat containing 49                                                      | protein_coding       | 102747 | -       |
| ENSMUSG00000047767 | 68.18  | 0.229 | -2.129 | 1.50869E-08 | 4.78126E-07  | Atg16l2       | autophagy related 16-like 2 (S. cerevisiae)                                            | protein_coding       | 73683  | -       |
| ENSMUSG00000047867 | 314.14 | 0.197 | -2.341 | 9.28355E-12 | 9.53234E-10  | Gimap6        | GTPase, IMAP family member 6                                                           | protein_coding       | 231931 | -       |



|                    |        |        |        |             |             |               |                                                                          |                |        |     |
|--------------------|--------|--------|--------|-------------|-------------|---------------|--------------------------------------------------------------------------|----------------|--------|-----|
| ENSMUSG00000047880 | 75.66  | 0.196  | -2.353 | 7.74203E-10 | 4.09166E-08 | Cxcr5         | chemokine (C-X-C motif) receptor 5                                       | protein_coding | 12145  | -   |
| ENSMUSG00000047953 | 224.38 | 5.219  | 2.384  | 9.22421E-07 | 1.42031E-05 | Gp5           | glycoprotein 5 (platelet)                                                | protein_coding | 14729  | -   |
| ENSMUSG00000047986 | 7.52   | 0.178  | -2.493 | 0.004741577 | 0.01487974  | Palm3         | paralemmin 3                                                             | protein_coding | 74337  | -   |
| ENSMUSG00000048078 | 81.22  | 4.018  | 2.007  | 2.77825E-08 | 7.84942E-07 | Tenm4         | teneurin transmembrane protein 4                                         | protein_coding | 23966  | -   |
| ENSMUSG00000048096 | 8.17   | 10.107 | 3.337  | 6.9453E-06  | 7.40758E-05 | Lmod1         | leiomodulin 1 (smooth muscle)                                            | protein_coding | 93689  | -   |
| ENSMUSG00000048126 | 8.77   | 4.001  | 2      | 0.01058826  | 0.028426781 | Col6a3        | collagen, type VI, alpha 3                                               | protein_coding | 12835  | -   |
| ENSMUSG00000048186 | 14.4   | 7.161  | 2.84   | 9.19749E-07 | 1.41741E-05 | Bend7         | BEN domain containing 7                                                  | protein_coding | 209645 | -   |
| ENSMUSG00000048215 | 77.03  | 0.11   | -3.185 | 1.37423E-10 | 9.214E-09   | A630023P12Rik | RIKEN cDNA A630023P12 gene                                               | lincRNA        | 231603 | -   |
| ENSMUSG00000048316 | 8.88   | 0.114  | -3.137 | 0.000105438 | 0.000683479 | Gm9823        | -                                                                        | pseudogene     | -      | -   |
| ENSMUSG00000048332 | 35.45  | 4.152  | 2.054  | 1.03487E-06 | 1.55482E-05 | Lhfp          | lipoma HMGIC fusion partner                                              | protein_coding | 108927 | -   |
| ENSMUSG00000048349 | 9.59   | 4.228  | 2.08   | 0.01123886  | 0.029786294 | Pou4f1        | POU domain, class 4, transcription factor 1                              | protein_coding | 18996  | Pou |
| ENSMUSG00000048537 | 17.62  | 4.067  | 2.024  | 4.52223E-05 | 0.000344906 | Phldb1        | pleckstrin homology like domain, family B, member 1                      | protein_coding | 102693 | -   |
| ENSMUSG00000048583 | 7.56   | 7.759  | 2.956  | 4.8091E-05  | 0.000362558 | Igf2          | insulin-like growth factor 2                                             | protein_coding | 16002  | -   |
| ENSMUSG00000048644 | 19.06  | 6.091  | 2.607  | 1.1265E-06  | 1.66464E-05 | Ctxn1         | cortixin 1                                                               | protein_coding | 330695 | -   |
| ENSMUSG00000048782 | 13.78  | 7.803  | 2.964  | 1.99595E-07 | 3.99835E-06 | Insc          | INSC spindle orientation adaptor protein                                 | protein_coding | 233752 | -   |
| ENSMUSG00000048834 | 12.39  | 4.904  | 2.294  | 0.003384045 | 0.011326371 | Vstm2a        | V-set and transmembrane domain containing 2A                             | protein_coding | 211739 | -   |
| ENSMUSG00000048899 | 10.08  | 9.828  | 3.297  | 9.77278E-06 | 9.78858E-05 | Rimk1a        | ribosomal modification protein rimK-like family member A                 | protein_coding | 194237 | -   |
| ENSMUSG00000048915 | 31.6   | 4.417  | 2.143  | 7.54908E-06 | 7.95131E-05 | Efna5         | ephrin A5                                                                | protein_coding | 13640  | -   |
| ENSMUSG00000048939 | 13.76  | 5.608  | 2.488  | 0.001456156 | 0.005740603 | Atp13a5       | ATPase type 13A5                                                         | protein_coding | 268878 | -   |
| ENSMUSG00000048960 | 24.92  | 5.772  | 2.529  | 5.96576E-08 | 1.45849E-06 | Prex2         | phosphatidylinositol-3,4,5-trisphosphate-dependent Rac exchange factor 2 | protein_coding | 109294 | -   |
| ENSMUSG00000049086 | 18.57  | 0.054  | -4.22  | 2.64895E-09 | 1.18406E-07 | Bmyc          | brain expressed myelocytomatosis oncogene                                | protein_coding | 107771 | -   |
| ENSMUSG00000049090 | 44     | 0.15   | -2.734 | 2.16467E-10 | 1.35529E-08 | Zadh2         | zinc binding alcohol dehydrogenase, domain containing 2                  | protein_coding | 225791 | -   |
| ENSMUSG00000049093 | 5.24   | 4.07   | 2.025  | 0.012331522 | 0.031997852 | Il23r         | interleukin 23 receptor                                                  | protein_coding | 209590 | -   |
| ENSMUSG00000049100 | 8      | 5.451  | 2.446  | 0.000507312 | 0.002423496 | Pcdh10        | protocadherin 10                                                         | protein_coding | 18526  | -   |

|                    |          |       |        |             |             |         |                                                                                                |                |        |          |
|--------------------|----------|-------|--------|-------------|-------------|---------|------------------------------------------------------------------------------------------------|----------------|--------|----------|
| ENSMUSG00000049103 | 58.36    | 0.208 | -2.268 | 6.85944E-06 | 7.32801E-05 | Ccr2    | chemokine (C-C motif) receptor 2                                                               | protein_coding | 12772  | -        |
| ENSMUSG00000049107 | 7.18     | 4.709 | 2.235  | 0.002200576 | 0.008027234 | Ntf3    | neurotrophin 3                                                                                 | protein_coding | 18205  | -        |
| ENSMUSG00000049119 | 69.84    | 5.072 | 2.343  | 1.77611E-07 | 3.61029E-06 | Fam110b | family with sequence similarity 110, member B                                                  | protein_coding | 242297 | -        |
| ENSMUSG00000049124 | 29.47    | 0.102 | -3.3   | 5.42798E-11 | 4.3349E-09  | Gm8186  | -                                                                                              | protein_coding | -      | -        |
| ENSMUSG00000049130 | 80.59    | 4.304 | 2.106  | 2.90742E-08 | 8.08721E-07 | C5ar1   | complement component 5a receptor 1                                                             | protein_coding | 12273  | -        |
| ENSMUSG00000049265 | 11.4     | 4.776 | 2.256  | 0.000151089 | 0.000912274 | Kcnk3   | potassium channel, subfamily K, member 3                                                       | protein_coding | 16527  | -        |
| ENSMUSG00000049300 | 14.48    | 0.213 | -2.231 | 0.000277091 | 0.001482263 | Prmt6   | protein arginine N-methyltransferase 6                                                         | protein_coding | 99890  | -        |
| ENSMUSG00000049404 | 6.47     | 4.893 | 2.291  | 0.001485401 | 0.005826494 | Rarres1 | retinoic acid receptor responder (tazarotene induced) 1                                        | protein_coding | 109222 | -        |
| ENSMUSG00000049421 | 40.6     | 0.173 | -2.531 | 1.03215E-08 | 3.55301E-07 | Zfp260  | zinc finger protein 260                                                                        | protein_coding | 26466  | zf-C2H2  |
| ENSMUSG00000049482 | 33.1     | 0.168 | -2.576 | 3.13208E-10 | 1.82729E-08 | Ctu2    | cytosolic thiouridylase subunit 2                                                              | protein_coding | 66965  | -        |
| ENSMUSG00000049493 | 44.44    | 4.402 | 2.138  | 3.63708E-07 | 6.59482E-06 | Pls1    | plastin 1 (I-isoform)                                                                          | protein_coding | 102502 | -        |
| ENSMUSG00000049538 | 10.34    | 6.528 | 2.707  | 0.000275304 | 0.001474059 | Adams16 | a disintegrin-like and metallopeptidase (reprolysin type) with thrombospondin type 1 motif, 16 | protein_coding | 271127 | -        |
| ENSMUSG00000049551 | 6.18     | 6.285 | 2.652  | 0.002197395 | 0.008018886 | Fzd9    | frizzled class receptor 9                                                                      | protein_coding | 14371  | -        |
| ENSMUSG00000049556 | 31.11    | 4.405 | 2.139  | 3.86239E-05 | 0.000302016 | Lingo1  | leucine rich repeat and Ig domain containing 1                                                 | protein_coding | 235402 | -        |
| ENSMUSG00000049600 | 11.67    | 0.244 | -2.035 | 0.003911486 | 0.012745823 | Zbtb45  | zinc finger and BTB domain containing 45                                                       | protein_coding | 232879 | ZBTB     |
| ENSMUSG00000049691 | 8.08     | 4.047 | 2.017  | 0.012218189 | 0.031763402 | Nkx3-2  | NK3 homeobox 2                                                                                 | protein_coding | 12020  | Homeobox |
| ENSMUSG00000049751 | 170.1    | 0.182 | -2.461 | 1.61297E-12 | 2.16295E-10 | Rpl36al | ribosomal protein L36A-like                                                                    | protein_coding | 66483  | -        |
| ENSMUSG00000049775 | 19942.16 | 4.504 | 2.171  | 4.32961E-05 | 0.000332189 | Tmsb4x  | thymosin, beta 4, X chromosome                                                                 | protein_coding | 19241  | -        |
| ENSMUSG00000049858 | 8.36     | 0.168 | -2.575 | 0.002590276 | 0.009119253 | Suox    | sulfite oxidase                                                                                | protein_coding | 211389 | -        |
| ENSMUSG00000049957 | 13.01    | 0.159 | -2.651 | 8.98387E-06 | 9.16153E-05 | Ccdc137 | coiled-coil domain containing 137                                                              | protein_coding | 67291  | -        |
| ENSMUSG00000049960 | 32.54    | 0.24  | -2.058 | 0.000109646 | 0.000703153 | Mrps16  | mitochondrial ribosomal protein S16                                                            | protein_coding | 66242  | -        |
| ENSMUSG00000049999 | 40.72    | 5.373 | 2.426  | 7.63377E-11 | 5.78781E-09 | Ppp1r3d | protein phosphatase 1, regulatory subunit 3D                                                   | protein_coding | 228966 | -        |
| ENSMUSG00000050052 | 35.68    | 0.182 | -2.459 | 2.80914E-08 | 7.88305E-07 | Tdrp    | testis development related protein                                                             | protein_coding | 72148  | -        |

|                    |        |        |        |             |             |               |                                                             |                |        |          |
|--------------------|--------|--------|--------|-------------|-------------|---------------|-------------------------------------------------------------|----------------|--------|----------|
| ENSMUSG00000050075 | 24.3   | 0.221  | -2.177 | 5.58874E-05 | 0.00040707  | Gpr171        | G protein-coupled receptor 171                              | protein_coding | 229323 | -        |
| ENSMUSG00000050174 | 12.86  | 0.21   | -2.25  | 0.000377151 | 0.001904196 | Nudt6         | nudix (nucleoside diphosphate linked moiety X)-type motif 6 | protein_coding | 229228 | -        |
| ENSMUSG00000050197 | 5.02   | 21.952 | 4.456  | 5.74669E-07 | 9.63268E-06 | Rhox13        | reproductive homeobox 13                                    | protein_coding | 73614  | Homeobox |
| ENSMUSG00000050222 | 7.66   | 5.129  | 2.359  | 0.006118043 | 0.018325573 | Il17d         | interleukin 17D                                             | protein_coding | 239114 | -        |
| ENSMUSG00000050248 | 11.82  | 5.952  | 2.573  | 6.26846E-05 | 0.000445811 | Evc2          | EvC ciliary complex subunit 2                               | protein_coding | 68525  | -        |
| ENSMUSG00000050272 | 46.46  | 4.686  | 2.228  | 3.13718E-08 | 8.60642E-07 | Dscam         | DS cell adhesion molecule                                   | protein_coding | 13508  | -        |
| ENSMUSG00000050295 | 8.49   | 6.783  | 2.762  | 2.71604E-05 | 0.000227952 | Foxc1         | forkhead box C1                                             | protein_coding | 17300  | Fork     |
| ENSMUSG00000050296 | 17.01  | 5.08   | 2.345  | 0.000112854 | 0.000719358 | Abca12        | ATP-binding cassette, sub-family A (ABC1), member 12        | protein_coding | 74591  | -        |
| ENSMUSG00000050315 | 17.27  | 4.83   | 2.272  | 0.000103503 | 0.000672396 | Synpo2        | synaptopodin 2                                              | protein_coding | 118449 | -        |
| ENSMUSG00000050321 | 24.34  | 6.885  | 2.783  | 1.6935E-08  | 5.24665E-07 | Neto1         | neuropilin (NRP) and tolloid (TLL)-like 1                   | protein_coding | 246317 | -        |
| ENSMUSG00000050334 | 19.9   | 4.423  | 2.145  | 1.08977E-06 | 1.62103E-05 | C130071C03Rik | RIKEN cDNA C130071C03 gene                                  | lincRNA        | 320203 | -        |
| ENSMUSG00000050345 | 152.99 | 6.983  | 2.804  | 2.07943E-11 | 1.90757E-09 | 4930486L24Rik | RIKEN cDNA 4930486L24 gene                                  | protein_coding | 214639 | -        |
| ENSMUSG00000050350 | 46.38  | 0.101  | -3.31  | 4.57953E-13 | 7.34728E-11 | Gpr18         | G protein-coupled receptor 18                               | protein_coding | 110168 | -        |
| ENSMUSG00000050357 | 58.19  | 0.147  | -2.765 | 4.86754E-11 | 3.94056E-09 | Carmil2       | capping protein regulator and myosin 1 linker 2             | protein_coding | 234695 | -        |
| ENSMUSG00000050390 | 15.84  | 4.12   | 2.043  | 0.000111191 | 0.000711597 | C77080        | expressed sequence C77080                                   | protein_coding | 97130  | -        |
| ENSMUSG00000050394 | 16.94  | 6.413  | 2.681  | 0.00031322  | 0.001640411 | Armcx6        | armadillo repeat containing, X-linked 6                     | protein_coding | 278097 | -        |
| ENSMUSG00000050439 | 16.7   | 4.495  | 2.168  | 0.000339939 | 0.001752255 | Enthd1        | ENTH domain containing 1                                    | protein_coding | 383075 | -        |
| ENSMUSG00000050447 | 12.38  | 5.668  | 2.503  | 0.000767108 | 0.00338692  | Lypd6         | LY6/PLAUR domain containing 6                               | protein_coding | 320343 | -        |
| ENSMUSG00000050511 | 6.86   | 5.709  | 2.513  | 0.004865815 | 0.015200597 | Oprd1         | opioid receptor, delta 1                                    | protein_coding | 18386  | -        |
| ENSMUSG00000050530 | 12.77  | 4.179  | 2.063  | 0.00035637  | 0.001817564 | Fam171a1      | family with sequence similarity 171, member A1              | protein_coding | 269233 | -        |
| ENSMUSG00000050541 | 13.27  | 4.161  | 2.057  | 0.002481699 | 0.008821691 | Adra1b        | adrenergic receptor, alpha 1b                               | protein_coding | 11548  | -        |
| ENSMUSG00000050545 | 5.77   | 4.165  | 2.058  | 0.006666841 | 0.019600207 | Fam228b       | family with sequence similarity 228, member B               | protein_coding | 207921 | -        |
| ENSMUSG00000050555 | 18.11  | 0.196  | -2.352 | 5.61681E-06 | 6.26495E-05 | Hyls1         | HYLS1, centriolar and ciliogenesis associated               | protein_coding | 76832  | -        |
| ENSMUSG00000050558 | 4.42   | 4.623  | 2.209  | 0.005776956 | 0.01750525  | Prokr2        | prokineticin receptor 2                                     | protein_coding | 246313 | -        |

|                    |        |       |        |             |             |               |                                                       |                |           |         |
|--------------------|--------|-------|--------|-------------|-------------|---------------|-------------------------------------------------------|----------------|-----------|---------|
| ENSMUSG00000050605 | 6.11   | 0.2   | -2.323 | 0.015487603 | 0.038306502 | Zfp61         | zinc finger protein 61                                | protein_coding | 22719     | zf-C2H2 |
| ENSMUSG00000050621 | 46.64  | 0.217 | -2.206 | 9.74157E-08 | 2.18535E-06 | Rps27rt       | ribosomal protein S27, retrogene                      | protein_coding | 100043813 | -       |
| ENSMUSG00000050663 | 28.04  | 4.816 | 2.268  | 7.35491E-06 | 7.76533E-05 | Trhde         | TRH-degrading enzyme                                  | protein_coding | 237553    | -       |
| ENSMUSG00000050666 | 9.64   | 4.036 | 2.013  | 0.000999643 | 0.004219108 | Vstm4         | V-set and transmembrane domain containing 4           | protein_coding | 320736    | -       |
| ENSMUSG00000050675 | 106.71 | 6.267 | 2.648  | 3.24038E-09 | 1.37078E-07 | Gp1ba         | glycoprotein 1b, alpha polypeptide                    | protein_coding | 14723     | -       |
| ENSMUSG00000050751 | 12.2   | 5.956 | 2.574  | 0.00015341  | 0.000923492 | Pgbd5         | piggyBac transposable element derived 5               | protein_coding | 209966    | -       |
| ENSMUSG00000050761 | 723.41 | 4.544 | 2.184  | 1.23327E-05 | 0.000118632 | Gp1bb         | glycoprotein 1b, beta polypeptide                     | protein_coding | 14724     | -       |
| ENSMUSG00000050783 | 31.91  | 4.384 | 2.132  | 3.6806E-05  | 0.000290839 | Htr1f         | 5-hydroxytryptamine (serotonin) receptor 1F           | protein_coding | 15557     | -       |
| ENSMUSG00000050908 | 32     | 0.202 | -2.311 | 6.99745E-08 | 1.66539E-06 | Tvp23a        | trans-golgi network vesicle protein 23A               | protein_coding | 383103    | -       |
| ENSMUSG00000050921 | 69.58  | 0.106 | -3.239 | 2.88098E-16 | 9.58672E-14 | P2ry10        | purinergic receptor P2Y, G-protein coupled 10         | protein_coding | 78826     | -       |
| ENSMUSG00000050966 | 9.92   | 4.237 | 2.083  | 0.000902488 | 0.003876836 | Lin28a        | lin-28 homolog A (C. elegans)                         | protein_coding | 83557     | CSD     |
| ENSMUSG00000050973 | 7.75   | 0.248 | -2.014 | 0.004329622 | 0.013859201 | Gdpgp1        | GDP-D-glucose phosphorylase 1                         | protein_coding | 269952    | -       |
| ENSMUSG00000050989 | 38.49  | 4.827 | 2.271  | 1.99812E-08 | 6.03434E-07 | Selenon       | selenoprotein N                                       | protein_coding | 74777     | -       |
| ENSMUSG00000050994 | 8.38   | 4.916 | 2.297  | 0.000629706 | 0.002890214 | Adgb          | androglobin                                           | protein_coding | 215772    | -       |
| ENSMUSG00000051076 | 4.76   | 4.085 | 2.03   | 0.012785751 | 0.032912979 | Vtcn1         | V-set domain containing T cell activation inhibitor 1 | protein_coding | 242122    | -       |
| ENSMUSG00000051079 | 4.62   | 6.096 | 2.608  | 0.002834586 | 0.009802669 | Rgs13         | regulator of G-protein signaling 13                   | protein_coding | 246709    | -       |
| ENSMUSG00000051098 | 56.78  | 4.477 | 2.163  | 8.03829E-08 | 1.85894E-06 | Mblac2        | metallo-beta-lactamase domain containing 2            | protein_coding | 72852     | -       |
| ENSMUSG00000051124 | 52.11  | 0.158 | -2.658 | 1.16571E-08 | 3.88621E-07 | Gimap9        | GTPase, IMAP family member 9                          | protein_coding | 317758    | -       |
| ENSMUSG00000051212 | 55.85  | 0.126 | -2.989 | 9.41028E-12 | 9.60757E-10 | Gpr183        | G protein-coupled receptor 183                        | protein_coding | 321019    | -       |
| ENSMUSG00000051228 | 16.78  | 5.962 | 2.576  | 1.28117E-07 | 2.72764E-06 | Nyx           | nyctalopin                                            | protein_coding | 236690    | -       |
| ENSMUSG00000051232 | 7.97   | 0.134 | -2.903 | 7.76471E-05 | 0.000531116 | Tmem199       | transmembrane protein 199                             | protein_coding | 195040    | -       |
| ENSMUSG00000051255 | 11.3   | 0.194 | -2.368 | 0.000260756 | 0.00141258  | Gm6563        | -                                                     | protein_coding | -         | -       |
| ENSMUSG00000051316 | 9.96   | 0.153 | -2.704 | 0.000530172 | 0.002514959 | Taf7          | TATA-box binding protein associated factor 7          | protein_coding | 24074     | -       |
| ENSMUSG00000051319 | 11.52  | 0.142 | -2.813 | 4.20075E-05 | 0.000323781 | 1500011K16Rik | mitoregulin                                           | protein_coding | 67885     | -       |

|                        |        |        |        |             |             |                   |                                                                  |                      |        |          |
|------------------------|--------|--------|--------|-------------|-------------|-------------------|------------------------------------------------------------------|----------------------|--------|----------|
| ENSMUSG00000<br>051323 | 13.13  | 4.712  | 2.236  | 0.001500233 | 0.005873135 | Pcdh19            | protocadherin 19                                                 | protein_coding       | 279653 | -        |
| ENSMUSG00000<br>051331 | 77.53  | 5.329  | 2.414  | 1.44146E-10 | 9.62887E-09 | Cacna1c           | calcium channel, voltage-dependent, L type, alpha 1C subunit     | protein_coding       | 12288  | -        |
| ENSMUSG00000<br>051346 | 4.66   | 0.117  | -3.092 | 0.001627353 | 0.006275085 | Spryd4            | SPRY domain containing 4                                         | protein_coding       | 66701  | -        |
| ENSMUSG00000<br>051367 | 5.99   | 10.259 | 3.359  | 7.53074E-05 | 0.000518467 | Six1              | sine oculis-related homeobox 1                                   | protein_coding       | 20471  | Homeobox |
| ENSMUSG00000<br>051375 | 6.94   | 5.607  | 2.487  | 0.00351562  | 0.011685569 | Pcdh1             | protocadherin 1                                                  | protein_coding       | 75599  | -        |
| ENSMUSG00000<br>051378 | 7.39   | 5.904  | 2.562  | 0.006712269 | 0.01970153  | Kif18b            | kinesin family member 18B                                        | protein_coding       | 70218  | -        |
| ENSMUSG00000<br>051401 | 21.94  | 4.3    | 2.104  | 0.0004703   | 0.002281537 | Kctd16            | potass85aladin85izationramerisation domain containing 16         | protein_coding       | 383348 | -        |
| ENSMUSG00000<br>051457 | 168.51 | 0.228  | -2.136 | 1.03588E-10 | 7.32825E-09 | Spn               | sialophorin                                                      | protein_coding       | 20737  | -        |
| ENSMUSG00000<br>051490 | 4.79   | 9.024  | 3.174  | 0.002526321 | 0.008948446 | Foxd4             | forkhead box D4                                                  | protein_coding       | 14237  | Fork     |
| ENSMUSG00000<br>051497 | 6.25   | 4.811  | 2.266  | 0.013482955 | 0.034282611 | Kcnj16            | potassium inwardly-rectifying channel, subfamily J, member 16    | protein_coding       | 16517  | -        |
| ENSMUSG00000<br>051557 | 14.31  | 0.237  | -2.075 | 0.000388221 | 0.001948589 | Pusl1             | pseudouridylate synthase-like 1                                  | protein_coding       | 433813 | -        |
| ENSMUSG00000<br>051606 | 7.51   | 7.424  | 2.892  | 0.000106689 | 0.000689332 | 2010001K21R<br>ik | -                                                                | processed_transcript | -      | -        |
| ENSMUSG00000<br>051615 | 105.59 | 4.456  | 2.156  | 5.54518E-12 | 6.1507E-10  | Rap2a             | RAS related protein 2a                                           | protein_coding       | 76108  | -        |
| ENSMUSG00000<br>051616 | 5.48   | 4.69   | 2.23   | 0.005241211 | 0.01615703  | C230029F24R<br>ik | RIKEN cDNA C230029F24 gene                                       | lincRNA              | 442837 | -        |
| ENSMUSG00000<br>051639 | 13.07  | 0.202  | -2.308 | 0.000740609 | 0.003294875 | Gm5812            | -                                                                | processed_pseudogene | -      | -        |
| ENSMUSG00000<br>051727 | 14.77  | 0.07   | -3.836 | 3.90048E-07 | 7.00176E-06 | Kctd14            | potass85aladin85izationramerisation domain containing 14         | protein_coding       | 233529 | -        |
| ENSMUSG00000<br>051777 | 12.63  | 4.398  | 2.137  | 0.000984938 | 0.004168916 | Iqj               | IQ motif containing J                                            | protein_coding       | 208426 | -        |
| ENSMUSG00000<br>051811 | 137.11 | 4.343  | 2.119  | 2.05774E-09 | 9.60405E-08 | Cox6b2            | cytochrome c oxidase subunit 6B2                                 | protein_coding       | 333182 | -        |
| ENSMUSG00000<br>051851 | 116.87 | 6.571  | 2.716  | 1.6793E-12  | 2.23521E-10 | Cxx1c             | retrotransposon Gag like 8C                                      | protein_coding       | 72865  | -        |
| ENSMUSG00000<br>051855 | 439.13 | 8.345  | 3.061  | 8.42037E-16 | 2.5645E-13  | Mest              | mesoderm specific transcript                                     | protein_coding       | 17294  | -        |
| ENSMUSG00000<br>051985 | 9.78   | 8.222  | 3.039  | 4.29953E-05 | 0.000330164 | Igfn1             | immunoglobulin-like and fibronectin type III domain containing 1 | protein_coding       | 226438 | -        |
| ENSMUSG00000<br>051998 | 51.94  | 0.079  | -3.663 | 1.06831E-16 | 3.99926E-14 | Lax1              | lymphocyte transmembrane adaptor 1                               | protein_coding       | 240754 | -        |
| ENSMUSG00000<br>052013 | 125.17 | 0.119  | -3.069 | 3.65217E-11 | 3.03823E-09 | Btla              | B and T lymphocyte associated                                    | protein_coding       | 208154 | -        |
| ENSMUSG00000<br>052031 | 58.49  | 0.176  | -2.507 | 2.65805E-06 | 3.38261E-05 | Tagap1            | T cell activation GTPase activating protein 1                    | protein_coding       | 380608 | -        |

|                    |        |       |        |             |             |                   |                                                                  |                      |        |         |
|--------------------|--------|-------|--------|-------------|-------------|-------------------|------------------------------------------------------------------|----------------------|--------|---------|
| ENSMUSG00000052135 | 15.1   | 4.514 | 2.174  | 0.000569761 | 0.002664072 | Foxo6             | forkhead box O6                                                  | protein_coding       | 329934 | Fork    |
| ENSMUSG00000052142 | 116.65 | 0.169 | -2.563 | 4.14745E-11 | 3.40299E-09 | Rasal3            | RAS protein activator like 3                                     | protein_coding       | 320484 | -       |
| ENSMUSG00000052192 | 3.36   | 0.019 | -5.719 | 0.000107041 | 0.000690632 | Gm5963            | -                                                                | processed_pseudogene | -      | -       |
| ENSMUSG00000052217 | 503.64 | 4.57  | 2.192  | 0.000316458 | 0.001651269 | Hbb-bh1           | hemoglobin Z, beta-like embryonic chain                          | protein_coding       | 15132  | -       |
| ENSMUSG00000052241 | 5.93   | 4.739 | 2.245  | 0.003327326 | 0.011178431 | A930035D04<br>Rik | -                                                                | pseudogene           | -      | -       |
| ENSMUSG00000052248 | 115.89 | 4.804 | 2.264  | 1.35852E-08 | 4.39053E-07 | Zeb2os            | zinc finger E-box binding homeobox 2, opposite strand            | antisense_RNA        | 433424 | -       |
| ENSMUSG00000052270 | 54.45  | 6.802 | 2.766  | 1.2774E-08  | 4.21174E-07 | Fpr2              | formyl peptide receptor 2                                        | protein_coding       | 14289  | -       |
| ENSMUSG00000052281 | 27.62  | 0.175 | -2.515 | 1.81806E-08 | 5.54865E-07 | Tspan32os         | -                                                                | antisense_RNA        | -      | -       |
| ENSMUSG00000052293 | 26.61  | 0.169 | -2.563 | 3.99588E-07 | 7.14448E-06 | Taf9              | TATA-box binding protein associated factor 9                     | protein_coding       | 108143 | -       |
| ENSMUSG00000052353 | 14.07  | 4.094 | 2.034  | 0.000469423 | 0.002278997 | Cemip             | cell migration inducing protein, hyaluronan binding              | protein_coding       | 80982  | -       |
| ENSMUSG00000052371 | 14.04  | 5.789 | 2.533  | 0.000747247 | 0.003315562 | Hoxd3os1          | -                                                                | antisense_RNA        | -      | -       |
| ENSMUSG00000052373 | 6.72   | 4.622 | 2.208  | 0.002392092 | 0.008572698 | Mpp3              | membrane protein, palmitoylated 3 (MAGUK p55 subfamily member 3) | protein_coding       | 13384  | -       |
| ENSMUSG00000052415 | 7.27   | 5.319 | 2.411  | 0.006185682 | 0.018491186 | Tchh              | trichohyalin                                                     | protein_coding       | 99681  | -       |
| ENSMUSG00000052419 | 16.75  | 0.174 | -2.521 | 1.14254E-05 | 0.000111699 | 2610001J05Rik     | RIKEN cDNA 2610001J05 gene                                       | protein_coding       | 66520  | -       |
| ENSMUSG00000052479 | 17.07  | 4.128 | 2.045  | 0.000341407 | 0.001756877 | A330008L17<br>Rik | RIKEN cDNA A330008L17 gene                                       | lincRNA              | 234624 | -       |
| ENSMUSG00000052504 | 21.69  | 4.377 | 2.13   | 1.82542E-06 | 2.49611E-05 | Epha3             | Eph receptor A3                                                  | protein_coding       | 13837  | -       |
| ENSMUSG00000052516 | 41.17  | 4.173 | 2.061  | 4.12675E-07 | 7.34195E-06 | Robo2             | roundabout guidance receptor 2                                   | protein_coding       | 268902 | -       |
| ENSMUSG00000052688 | 5.15   | 4.447 | 2.153  | 0.014084657 | 0.03542654  | Rab7b             | RAB7B, member RAS oncogene family                                | protein_coding       | 226421 | -       |
| ENSMUSG00000052727 | 16.96  | 4.358 | 2.124  | 0.002016907 | 0.007466379 | Map1b             | microtubule-associated protein 1B                                | protein_coding       | 17755  | -       |
| ENSMUSG00000052760 | 71.13  | 0.222 | -2.171 | 2.4949E-08  | 7.16147E-07 | A630001G21<br>Rik | RIKEN cDNA A630001G21 gene                                       | protein_coding       | 319997 | -       |
| ENSMUSG00000052949 | 169.79 | 5.021 | 2.328  | 0.000835502 | 0.00364308  | Rnf157            | ring finger protein 157                                          | protein_coding       | 217340 | -       |
| ENSMUSG00000052955 | 8.28   | 6.162 | 2.623  | 0.000529249 | 0.002512652 | Cpvl              | carboxypeptidase, vitellogenic-like                              | protein_coding       | 71287  | -       |
| ENSMUSG00000053007 | 280.75 | 6.881 | 2.783  | 1.1696E-12  | 1.66798E-10 | Creb5             | cAMP responsive element binding protein 5                        | protein_coding       | 231991 | TF_bZIP |
| ENSMUSG00000053024 | 7.16   | 7.419 | 2.891  | 0.002878017 | 0.009931838 | Cntn2             | contactin 2                                                      | protein_coding       | 21367  | -       |

|                        |         |        |        |             |             |           |                                                                       |                      |        |   |
|------------------------|---------|--------|--------|-------------|-------------|-----------|-----------------------------------------------------------------------|----------------------|--------|---|
| ENSMUSG00000<br>053025 | 18.49   | 5.084  | 2.346  | 2.28056E-05 | 0.000197111 | Sv2b      | synaptic vesicle glycoprotein 2 b                                     | protein_coding       | 64176  | - |
| ENSMUSG00000<br>053040 | 6.41    | 5.446  | 2.445  | 0.004822485 | 0.015086216 | Aph1c     | aph1 homolog C, gamma secretase subunit                               | protein_coding       | 68318  | - |
| ENSMUSG00000<br>053044 | 87.21   | 0.074  | -3.753 | 1.26046E-16 | 4.6223E-14  | Cd8b1     | CD8 antigen, beta chain 1                                             | protein_coding       | 12526  | - |
| ENSMUSG00000<br>053046 | 13.71   | 5.016  | 2.327  | 3.05237E-05 | 0.000249423 | Brsk2     | BR serine/threonine kinase 2                                          | protein_coding       | 75770  | - |
| ENSMUSG00000<br>053093 | 7.52    | 6.988  | 2.805  | 0.001641107 | 0.00632115  | Myh7      | myosin, heavy polypeptide 7, cardiac muscle, beta                     | protein_coding       | 140781 | - |
| ENSMUSG00000<br>053111 | 9.19    | 5.542  | 2.47   | 0.001604731 | 0.006207839 | Fank1     | fibronectin type 3 and ankyrin repeat domains 1                       | protein_coding       | 66930  | - |
| ENSMUSG00000<br>053137 | 21.41   | 0.218  | -2.194 | 1.79658E-05 | 0.000162798 | Mapk11    | mitogen-activated protein kinase 11                                   | protein_coding       | 19094  | - |
| ENSMUSG00000<br>053161 | 6.38    | 4.039  | 2.014  | 0.003419678 | 0.011413481 | Daw1      | dynein assembly factor with WDR repeat domains 1                      | protein_coding       | 71227  | - |
| ENSMUSG00000<br>053173 | 30.75   | 0.226  | -2.146 | 1.69507E-06 | 2.35021E-05 | Rpl18-ps2 | -                                                                     | processed_pseudogene | -      | - |
| ENSMUSG00000<br>053182 | 6.72    | 10.472 | 3.389  | 1.21706E-05 | 0.000117475 | Gm609     | predicted gene 609                                                    | protein_coding       | 208166 | - |
| ENSMUSG00000<br>053310 | 8442.69 | 5.911  | 2.563  | 8.54866E-07 | 1.32881E-05 | Nrgn      | neurogranin                                                           | protein_coding       | 64011  | - |
| ENSMUSG00000<br>053329 | 20.88   | 0.199  | -2.326 | 0.000108292 | 0.000696704 | D10Jhu81e | DNA segment, Chr 10, Johns Hopkins University 81 expressed            | protein_coding       | 28295  | - |
| ENSMUSG00000<br>053414 | 23.44   | 4.325  | 2.113  | 4.273E-06   | 5.01651E-05 | Hunk      | hormonally upregulated Neu-associated kinase                          | protein_coding       | 26559  | - |
| ENSMUSG00000<br>053550 | 8.18    | 8.355  | 3.063  | 0.000309862 | 0.001626141 | Shisa7    | shisa family member 7                                                 | protein_coding       | 232813 | - |
| ENSMUSG00000<br>053580 | 153.37  | 12.021 | 3.588  | 6.49856E-05 | 0.000459554 | Tanc2     | tetratricopeptide repeat, ankyrin repeat and coiled-coil containing 2 | protein_coding       | 77097  | - |
| ENSMUSG00000<br>053801 | 11.95   | 0.044  | -4.491 | 1.80312E-08 | 5.52905E-07 | Grwd1     | glutamate-rich WD repeat containing 1                                 | protein_coding       | 101612 | - |
| ENSMUSG00000<br>053841 | 34.23   | 0.114  | -3.139 | 2.07669E-10 | 1.30476E-08 | Txlna     | taxilin alpha                                                         | protein_coding       | 109658 | - |
| ENSMUSG00000<br>053846 | 7.82    | 8.645  | 3.112  | 0.000522003 | 0.002483418 | Lipg      | lipase, endothelial                                                   | protein_coding       | 16891  | - |
| ENSMUSG00000<br>053852 | 8.05    | 4.651  | 2.218  | 0.006612897 | 0.019479861 | Adgrg4    | adhesion G protein-coupled receptor G4                                | protein_coding       | 236798 | - |
| ENSMUSG00000<br>053963 | 7.25    | 4.001  | 2      | 0.014179462 | 0.035595243 | Stum      | mechanosensory transduction mediator                                  | protein_coding       | 381310 | - |
| ENSMUSG00000<br>053965 | 37.07   | 6.334  | 2.663  | 8.64538E-11 | 6.43504E-09 | Pde5a     | phosphodiesterase 5A, cGMP-specific                                   | protein_coding       | 242202 | - |
| ENSMUSG00000<br>053977 | 80.42   | 0.112  | -3.153 | 9.20148E-14 | 1.85777E-11 | Cd8a      | CD8 antigen, alpha chain                                              | protein_coding       | 12525  | - |
| ENSMUSG00000<br>054013 | 7.13    | 5.451  | 2.447  | 0.015530016 | 0.038395549 | Tmem179   | transmembrane protein 179                                             | protein_coding       | 104885 | - |
| ENSMUSG00000<br>054061 | 5.21    | 5.147  | 2.364  | 0.005175715 | 0.015993536 | Gm9934    | -                                                                     | antisense_RNA        | -      | - |

|                    |        |        |        |             |             |                   |                                                                      |                |        |          |
|--------------------|--------|--------|--------|-------------|-------------|-------------------|----------------------------------------------------------------------|----------------|--------|----------|
| ENSMUSG00000054065 | 37.07  | 0.173  | -2.528 | 2.99856E-08 | 8.30219E-07 | Pkp3              | plakophilin 3                                                        | protein_coding | 56460  | -        |
| ENSMUSG00000054146 | 4.93   | 6.517  | 2.704  | 0.007037485 | 0.020456324 | Krt15             | keratin 15                                                           | protein_coding | 16665  | -        |
| ENSMUSG00000054252 | 3.21   | 5.736  | 2.52   | 0.012159976 | 0.031666077 | Fgfr3             | fibroblast growth factor receptor 3                                  | protein_coding | 14184  | -        |
| ENSMUSG00000054256 | 7.73   | 4.256  | 2.09   | 0.001360688 | 0.005427349 | Msi1              | musashi RNA-binding protein 1                                        | protein_coding | 17690  | -        |
| ENSMUSG00000054293 | 16.1   | 0.145  | -2.787 | 2.37111E-07 | 4.61609E-06 | A630033H20<br>Rik | purinergic receptor P2Y, G-protein coupled 10B                       | protein_coding | 213438 | -        |
| ENSMUSG00000054310 | 8.97   | 6.715  | 2.747  | 0.000145674 | 0.000886727 | Obox1             | oocyte specific homeobox 1                                           | protein_coding | 71468  | Homeobox |
| ENSMUSG00000054320 | 7.71   | 4.432  | 2.148  | 0.005729576 | 0.017382933 | Lrrc36            | leucine rich repeat containing 36                                    | protein_coding | 270091 | -        |
| ENSMUSG00000054435 | 217.5  | 0.187  | -2.423 | 3.46282E-11 | 2.90763E-09 | Gimap4            | GTPase, IMAP family member 4                                         | protein_coding | 107526 | -        |
| ENSMUSG00000054514 | 6.01   | 5.27   | 2.398  | 0.000763143 | 0.003375027 | Atad3aos          | ATPase family, AAA domain containing 3A, opposite strand             | antisense_RNA  | 70448  | -        |
| ENSMUSG00000054519 | 4.43   | 0.122  | -3.04  | 0.001112103 | 0.004604464 | Zfp867            | zinc finger protein 867                                              | protein_coding | 237775 | zf-C2H2  |
| ENSMUSG00000054555 | 29.67  | 4.738  | 2.244  | 2.6267E-06  | 3.34983E-05 | Adam12            | a disintegrin and metallopeptidase domain 12 (meltrin alpha)         | protein_coding | 11489  | -        |
| ENSMUSG00000054641 | 127.96 | 5.17   | 2.37   | 9.55411E-11 | 6.92249E-09 | Mmm1              | multimerin 1                                                         | protein_coding | 70945  | -        |
| ENSMUSG00000054659 | 14.3   | 4.03   | 2.011  | 0.007597152 | 0.021768971 | Pm20d2            | peptidase M20 domain containing 2                                    | protein_coding | 242377 | -        |
| ENSMUSG00000054715 | 8.75   | 0.233  | -2.102 | 0.00725202  | 0.020950411 | Zscan22           | zinc finger and SCAN domain containing 22                            | protein_coding | 232878 | zf-C2H2  |
| ENSMUSG00000054746 | 8.91   | 8.983  | 3.167  | 0.000174424 | 0.00102059  | Abca15            | ATP-binding cassette, sub-family A (ABC1), member 15                 | protein_coding | 320631 | -        |
| ENSMUSG00000054752 | 9.78   | 7.471  | 2.901  | 0.001839516 | 0.006926711 | Fsd11             | fibronectin type III and SPRY domain containing 1-like               | protein_coding | 319636 | -        |
| ENSMUSG00000054793 | 9.05   | 15.583 | 3.962  | 1.06334E-07 | 2.356E-06   | Cadm4             | cell adhesion molecule 4                                             | protein_coding | 260299 | -        |
| ENSMUSG00000054863 | 16.04  | 5.45   | 2.446  | 3.52809E-06 | 4.28932E-05 | Fam19a5           | family with sequence similarity 19, member A5                        | protein_coding | 106014 | -        |
| ENSMUSG00000054871 | 74.66  | 7.569  | 2.92   | 2.7487E-09  | 1.21954E-07 | Tmem158           | transmembrane protein 158                                            | protein_coding | 72309  | -        |
| ENSMUSG00000054976 | 19     | 5.06   | 2.339  | 7.62502E-06 | 8.0219E-05  | Nvap2             | neuronal tyrosine-phosphorylated phosphoinositide 3-kinase adaptor 2 | protein_coding | 241134 | -        |
| ENSMUSG00000055015 | 6.69   | 9.322  | 3.221  | 5.36102E-05 | 0.000394158 | Gm9961            | predicted gene 9961                                                  | protein_coding | 791359 | -        |
| ENSMUSG00000055041 | 8.5    | 0.198  | -2.336 | 0.00172844  | 0.006585739 | Comm5             | COMM domain containing 5                                             | protein_coding | 66398  | -        |
| ENSMUSG00000055044 | 320.71 | 4.1    | 2.035  | 4.77649E-08 | 1.20886E-06 | Pdlim1            | PDZ and LIM domain 1 (elfin)                                         | protein_coding | 54132  | -        |
| ENSMUSG00000055078 | 9.72   | 4.512  | 2.174  | 0.000558231 | 0.002617657 | Gabra5            | gamma-aminobutyric acid (GABA) A receptor, subunit alpha 5           | protein_coding | 110886 | -        |



|                    |       |       |        |             |             |               |                                                          |                      |        |     |
|--------------------|-------|-------|--------|-------------|-------------|---------------|----------------------------------------------------------|----------------------|--------|-----|
| ENSMUSG00000055093 | 78.83 | 0.234 | -2.093 | 2.98995E-08 | 8.29112E-07 | Gm8430        | -                                                        | processed_pseudogene | -      | -   |
| ENSMUSG00000055134 | 6.66  | 6.607 | 2.724  | 0.000780679 | 0.003439929 | 9130017K11Rik | -                                                        | processed_transcript | -      | -   |
| ENSMUSG00000055320 | 32.55 | 4.196 | 2.069  | 5.7194E-06  | 6.33959E-05 | Tead1         | TEA domain family member 1                               | protein_coding       | 21676  | TEA |
| ENSMUSG00000055333 | 11.81 | 5.885 | 2.557  | 0.004868505 | 0.015206356 | Fat2          | FAT atypical cadherin 2                                  | protein_coding       | 245827 | -   |
| ENSMUSG00000055373 | 17.61 | 5.271 | 2.398  | 1.88305E-05 | 0.000169267 | Fut9          | fucosyltransferase 9                                     | protein_coding       | 14348  | -   |
| ENSMUSG00000055403 | 15.38 | 4.181 | 2.064  | 4.42916E-05 | 0.000338526 | 4933427D06Rik | RIKEN cDNA 4933427D06 gene                               | lincRNA              | 232217 | -   |
| ENSMUSG00000055415 | 9.77  | 5.393 | 2.431  | 0.000145074 | 0.000884873 | Atp10b        | ATPase, class V, type 10B                                | protein_coding       | 319767 | -   |
| ENSMUSG00000055471 | 69.21 | 4.652 | 2.218  | 3.88699E-08 | 1.03322E-06 | Alk           | anaplastic lymphoma kinase                               | protein_coding       | 11682  | -   |
| ENSMUSG00000055485 | 18.08 | 4.739 | 2.244  | 7.05301E-05 | 0.000492751 | Soga1         | suppressor of glucose, autophagy associated 1            | protein_coding       | 320706 | -   |
| ENSMUSG00000055489 | 7.35  | 5.808 | 2.538  | 0.000265086 | 0.001430375 | Ano5          | anoctamin 5                                              | protein_coding       | 233246 | -   |
| ENSMUSG00000055540 | 75.88 | 4.736 | 2.244  | 1.81877E-08 | 5.54865E-07 | Epha6         | Eph receptor A6                                          | protein_coding       | 13840  | -   |
| ENSMUSG00000055723 | 57.07 | 0.235 | -2.089 | 1.08336E-07 | 2.39445E-06 | Rras2         | related RAS viral (r-ras) oncogene 2                     | protein_coding       | 66922  | -   |
| ENSMUSG00000055775 | 9.17  | 6.9   | 2.787  | 0.000211123 | 0.00119373  | Myh8          | myosin, heavy polypeptide 8, skeletal muscle, perinatal  | protein_coding       | 17885  | -   |
| ENSMUSG00000055799 | 23.44 | 4.188 | 2.066  | 6.88848E-05 | 0.000482382 | Tcf7l1        | transcription factor 7 like 1 (T cell specific, HMG box) | protein_coding       | 21415  | HMG |
| ENSMUSG00000055809 | 6.76  | 4.716 | 2.238  | 0.001390237 | 0.005515823 | Dnaaf3        | dynein, axonemal assembly factor 3                       | protein_coding       | 436022 | -   |
| ENSMUSG00000055912 | 4.39  | 6.133 | 2.617  | 0.01519611  | 0.037715317 | Tmem150a      | transmembrane protein 150A                               | protein_coding       | 232086 | -   |
| ENSMUSG00000055963 | 20.64 | 6.728 | 2.75   | 2.74292E-07 | 5.21562E-06 | Triqk         | triple QxxK/R motif containing                           | protein_coding       | 208820 | -   |
| ENSMUSG00000055980 | 14    | 5.147 | 2.364  | 1.30741E-05 | 0.000124763 | Irs1          | insulin receptor substrate 1                             | protein_coding       | 16367  | -   |
| ENSMUSG00000056025 | 10.92 | 6.777 | 2.761  | 0.000269698 | 0.001449224 | Clca3a1       | chloride channel accessory 3A1                           | protein_coding       | 12722  | -   |
| ENSMUSG00000056031 | 8.91  | 4.435 | 2.149  | 0.000713186 | 0.00319662  | 9330154J02Rik | -                                                        | processed_transcript | -      | -   |
| ENSMUSG00000056073 | 58.36 | 4.758 | 2.25   | 7.5584E-09  | 2.74378E-07 | Grik2         | glutamate receptor, 89aladinpic, kainate 2 (beta 2)      | protein_coding       | 14806  | -   |
| ENSMUSG00000056076 | 59.51 | 0.221 | -2.181 | 6.75642E-06 | 7.2438E-05  | Eif3b         | eukaryotic translation initiation factor 3, subunit B    | protein_coding       | 27979  | -   |
| ENSMUSG00000056155 | 4.34  | 7.755 | 2.955  | 0.001010059 | 0.004255509 | Nanos3        | nanos C2HC-type zinc finger 3                            | protein_coding       | 244551 | -   |
| ENSMUSG00000056209 | 52.24 | 0.228 | -2.131 | 1.10906E-08 | 3.73196E-07 | Npm3          | nucleoplasmin 3                                          | protein_coding       | 18150  | -   |

|                    |         |       |        |             |             |                   |                                                                           |                |        |           |
|--------------------|---------|-------|--------|-------------|-------------|-------------------|---------------------------------------------------------------------------|----------------|--------|-----------|
| ENSMUSG00000056215 | 8.48    | 5.091 | 2.348  | 0.000316294 | 0.001651219 | Lrguk             | leucine-rich repeats and guanylate kinase domain containing               | protein_coding | 74354  | -         |
| ENSMUSG00000056222 | 57.89   | 4.5   | 2.17   | 8.40065E-09 | 2.97734E-07 | Spock1            | sparc/osteonectin, cwcv and kazal-like domains proteoglycan 1             | protein_coding | 20745  | -         |
| ENSMUSG00000056290 | 230.73  | 0.243 | -2.041 | 1.28847E-07 | 2.73995E-06 | Ms4a4b            | membrane-spanning 4-domains, subfamily A, member 4B                       | protein_coding | 60361  | -         |
| ENSMUSG00000056383 | 12.66   | 0.124 | -3.006 | 1.74252E-06 | 2.41042E-05 | AI987944          | expressed sequence AI987944                                               | protein_coding | 233168 | zf-C2H2   |
| ENSMUSG00000056418 | 13.94   | 0.037 | -4.746 | 6.7819E-09  | 2.51785E-07 | BC043934          | -                                                                         | lincRNA        | -      | -         |
| ENSMUSG00000056459 | 17.46   | 0.243 | -2.04  | 0.000246457 | 0.001351415 | Zbtb25            | zinc finger and BTB domain containing 25                                  | protein_coding | 109929 | ZBTB      |
| ENSMUSG00000056476 | 1032.43 | 5.208 | 2.381  | 9.1592E-10  | 4.74299E-08 | Med12l            | mediator complex subunit 12-like                                          | protein_coding | 329650 | -         |
| ENSMUSG00000056492 | 14.05   | 6.88  | 2.783  | 4.31124E-06 | 5.04682E-05 | Adgrf5            | adhesion G protein-coupled receptor F5                                    | protein_coding | 224792 | -         |
| ENSMUSG00000056531 | 13.66   | 4.169 | 2.06   | 0.003820289 | 0.012504766 | Ccdc18            | coiled-coil domain containing 18                                          | protein_coding | 73254  | -         |
| ENSMUSG00000056612 | 29.29   | 0.213 | -2.23  | 2.34319E-07 | 4.58158E-06 | Ppp1r14b          | protein phosphatase 1, regulatory inhibitor subunit 14B                   | protein_coding | 18938  | -         |
| ENSMUSG00000056629 | 14.07   | 0.234 | -2.095 | 0.000636072 | 0.002910512 | Fkbp2             | FK506 binding protein 2                                                   | protein_coding | 14227  | -         |
| ENSMUSG00000056665 | 22.69   | 0.074 | -3.749 | 5.01437E-11 | 4.03895E-09 | Them6             | thioesterase superfamily member 6                                         | protein_coding | 223626 | -         |
| ENSMUSG00000056735 | 15.3    | 0.229 | -2.129 | 0.002641983 | 0.009266796 | A930024E05<br>Rik | RIKEN cDNA A930024E05 gene                                                | antisense_RNA  | 109202 | -         |
| ENSMUSG00000056752 | 34.36   | 5.416 | 2.437  | 1.93216E-08 | 5.85048E-07 | Dnah9             | dynein, axonemal, heavy chain 9                                           | protein_coding | 237806 | -         |
| ENSMUSG00000056758 | 149.32  | 4.585 | 2.197  | 2.58517E-09 | 1.16132E-07 | Hmga2             | high mobility group AT-hook 2                                             | protein_coding | 15364  | HMGI/HMGY |
| ENSMUSG00000056820 | 52.68   | 0.175 | -2.517 | 1.08306E-06 | 1.61641E-05 | Tsnax             | translin-associated factor X                                              | protein_coding | 53424  | -         |
| ENSMUSG00000056856 | 16.13   | 6.456 | 2.691  | 2.11744E-06 | 2.80592E-05 | Jakmip3           | -                                                                         | protein_coding | -      | -         |
| ENSMUSG00000056899 | 327.05  | 4.126 | 2.045  | 1.51461E-07 | 3.16097E-06 | Imp2l             | IMP2 inner mitochondrial membrane peptidase-like ( <i>S. cerevisiae</i> ) | protein_coding | 93757  | -         |
| ENSMUSG00000056900 | 19.73   | 5.714 | 2.515  | 3.0774E-07  | 5.73628E-06 | Usp13             | ubiquitin specific peptidase 13 (isopeptidase T-3)                        | protein_coding | 72607  | -         |
| ENSMUSG00000057003 | 6.25    | 5.045 | 2.335  | 0.003197804 | 0.010829502 | Myh4              | myosin, heavy polypeptide 4, skeletal muscle                              | protein_coding | 17884  | -         |
| ENSMUSG00000057103 | 5.12    | 0.233 | -2.102 | 0.016439261 | 0.040195549 | Nat8f1            | N-acetyltransferase 8 (GCN5-related) family member 1                      | protein_coding | 66116  | -         |
| ENSMUSG00000057113 | 173.81  | 0.106 | -3.239 | 9.19024E-20 | 4.71827E-17 | Npm1              | nucleophosmin 1                                                           | protein_coding | 18148  | -         |
| ENSMUSG00000057137 | 489.39  | 4.161 | 2.057  | 2.79414E-06 | 3.5308E-05  | Tmem140           | transmembrane protein 140                                                 | protein_coding | 68487  | -         |
| ENSMUSG00000057182 | 11.09   | 5.478 | 2.454  | 2.59078E-05 | 0.000219076 | Scn3a             | sodium channel, voltage-gated, type III, alpha                            | protein_coding | 20269  | -         |

|                    |        |       |        |             |                    |                                           |                                                  |                      |        |         |
|--------------------|--------|-------|--------|-------------|--------------------|-------------------------------------------|--------------------------------------------------|----------------------|--------|---------|
| ENSMUSG00000057229 | 29.91  | 0.201 | -2.315 | 4.85331E-07 | 8.40165E-06        | Atp5sl                                    | distal membrane arm assembly complex 2           | protein_coding       | 66349  | -       |
| ENSMUSG00000057262 | 206.2  | 0.228 | -2.136 | 8.7023E-11  | 6.43504E-09        | Gm10020                                   | -                                                | protein_coding       | -      | -       |
| ENSMUSG00000057278 | 60.12  | 0.173 | -2.528 | 5.71729E-12 | 6.26427E-10        | Snrpg                                     | small nuclear ribonucleoprotein polypeptide G    | protein_coding       | 68011  | -       |
| ENSMUSG00000057337 | 121.26 | 0.061 | -4.038 | 7.53942E-23 | 5.64482E-20        | Chst3                                     | carbohydrate sulfotransferase 3                  | protein_coding       | 53374  | -       |
| ENSMUSG00000057411 | 23.51  | 0.218 | -2.198 | 2.64768E-05 | 0.000223153        | Fam173a                                   | family with sequence similarity 173, member A    | protein_coding       | 214917 | -       |
| ENSMUSG00000057497 | 8.48   | 0.198 | -2.334 | 0.00337868  | 0.011314107        | Fam136a                                   | family with sequence similarity 136, member A    | protein_coding       | 66488  | -       |
| ENSMUSG00000057604 | 8.83   | 5.046 | 2.335  | 0.005876255 | 0.017740327        | Lmcd1                                     | LIM and cysteine-rich domains 1                  | protein_coding       | 30937  | -       |
| ENSMUSG00000057605 | 133.39 | 0.217 | -2.201 | 6.57925E-12 | 7.07919E-10        | Gm6807                                    | -                                                | processed_pseudogene | -      | -       |
| ENSMUSG00000057657 | 95.14  | 0.11  | -3.191 | 1.58406E-16 | 5.69281E-14        | Rps18-ps3                                 | -                                                | processed_pseudogene | -      | -       |
| ENSMUSG00000057719 | 9.17   | 9.127 | 3.19   | 9.48669E-06 | 9.54459E-05        | Sh3rf2                                    | SH3 domain containing ring finger 2              | protein_coding       | 269016 | -       |
| ENSMUSG00000057880 | 19.75  | 6.076 | 2.603  | 3.3178E-06  | 4.06754E-05        | Abat                                      | 4-aminobutyrate aminotransferase                 | protein_coding       | 268860 | -       |
| ENSMUSG00000057894 | 19.36  | 0.245 | -2.028 | 0.000298025 | 0.001573212        | Zfp329                                    | zinc finger protein 329                          | protein_coding       | 67230  | zf-C2H2 |
| ENSMUSG00000057982 | 29.83  | 0.23  | -2.122 | 8.81397E-06 | 9.0347E-05         | Zfp809                                    | zinc finger protein 809                          | protein_coding       | 235047 | zf-C2H2 |
| ENSMUSG00000058022 | 11.35  | 8.382 | 3.067  | 7.2107E-05  | 0.00050046         | Adtrp                                     | androgen dependent TFPI regulating protein       | protein_coding       | 109254 | -       |
| ENSMUSG00000058056 | 53.63  | 5.175 | 2.372  | 8.59546E-10 | 4.463991aladinnlld | palladin, cytoskeletal associated protein | protein_coding                                   | 72333                | -      | -       |
| ENSMUSG00000058064 | 141.55 | 0.166 | -2.59  | 1.59925E-05 | 0.000147606        | Gm10036                                   | -                                                | protein_coding       | -      | -       |
| ENSMUSG00000058070 | 28.45  | 5.416 | 2.437  | 3.22133E-10 | 1.87221E-08        | Eml1                                      | echinoderm microtubule associated protein like 1 | protein_coding       | 68519  | -       |
| ENSMUSG00000058152 | 23.98  | 5.484 | 2.455  | 3.75391E-06 | 4.51499E-05        | Chsy3                                     | chondroitin sulfate synthase 3                   | protein_coding       | 78923  | -       |
| ENSMUSG00000058153 | 20.23  | 4.253 | 2.088  | 0.000214213 | 0.001206355        | Sez6l                                     | seizure related 6 homolog like                   | protein_coding       | 56747  | -       |
| ENSMUSG00000058258 | 5.46   | 0.011 | -6.443 | 1.69837E-06 | 2.35296E-05        | Idi1                                      | isopentenyl-diphosphate delta isomerase          | protein_coding       | 319554 | -       |
| ENSMUSG00000058267 | 15.29  | 0.207 | -2.271 | 8.79851E-05 | 0.000587953        | Mrps14                                    | mitochondrial ribosomal protein S14              | protein_coding       | 64659  | -       |
| ENSMUSG00000058420 | 9.76   | 5.193 | 2.377  | 0.000482957 | 0.002332235        | Syt17                                     | synaptotagmin XVII                               | protein_coding       | 110058 | -       |
| ENSMUSG00000058441 | 5.86   | 4.958 | 2.31   | 0.016276986 | 0.039863862        | Panx2                                     | pannexin 2                                       | protein_coding       | 406218 | -       |
| ENSMUSG00000058470 | 68.19  | 0.138 | -2.856 | 1.37188E-12 | 1.88178E-10        | Gm8369                                    | predicted gene 8369                              | protein_coding       | 666926 | -       |

|                    |         |       |        |             |             |           |                                                        |                                  |           |         |
|--------------------|---------|-------|--------|-------------|-------------|-----------|--------------------------------------------------------|----------------------------------|-----------|---------|
| ENSMUSG00000058488 | 8.6     | 8.677 | 3.117  | 0.000172756 | 0.001012474 | Kl        | klotho                                                 | protein_coding                   | 16591     | -       |
| ENSMUSG00000058558 | 1843.02 | 0.233 | -2.102 | 2.12173E-06 | 2.80953E-05 | Rpl5      | ribosomal protein L5                                   | protein_coding                   | 100503670 | -       |
| ENSMUSG00000058600 | 523.09  | 0.243 | -2.043 | 3.6257E-09  | 1.50115E-07 | Rpl30     | ribosomal protein L30                                  | protein_coding                   | 19946     | -       |
| ENSMUSG00000058638 | 29.32   | 0.149 | -2.749 | 5.45256E-10 | 3.02398E-08 | Zfp110    | zinc finger protein 110                                | protein_coding                   | 65020     | zf-C2H2 |
| ENSMUSG00000058922 | 13.64   | 0.157 | -2.669 | 3.57712E-05 | 0.000285423 | Gm10052   | -                                                      | processed_pseudogene             | -         | -       |
| ENSMUSG00000058952 | 5.12    | 6.438 | 2.687  | 0.010567816 | 0.028388859 | Cfi       | complement component factor i                          | protein_coding                   | 12630     | -       |
| ENSMUSG00000059005 | 92.55   | 0.222 | -2.171 | 4.91675E-10 | 2.75231E-08 | Hnmpa3    | heterogeneous nuclear ribonucleoprotein A3             | protein_coding                   | 229279    | -       |
| ENSMUSG00000059049 | 22.19   | 4.209 | 2.074  | 3.2287E-05  | 0.000261926 | Frem1     | Fras1 related extracellular matrix protein 1           | protein_coding                   | 329872    | -       |
| ENSMUSG00000059070 | 915.54  | 0.202 | -2.31  | 3.22992E-10 | 1.87221E-08 | Rpl18     | ribosomal protein L18                                  | protein_coding                   | 19899     | -       |
| ENSMUSG00000059327 | 25.29   | 4.184 | 2.065  | 5.62214E-06 | 6.26701E-05 | Eda       | ectodysplasin-A                                        | protein_coding                   | 13607     | -       |
| ENSMUSG00000059493 | 26.51   | 4.26  | 2.091  | 2.16542E-06 | 2.85896E-05 | Nhs       | NHS actin remodeling regulator                         | protein_coding                   | 195727    | -       |
| ENSMUSG00000059602 | 46.65   | 4.225 | 2.079  | 8.95136E-06 | 9.13903E-05 | Syn3      | synapsin III                                           | protein_coding                   | 27204     | -       |
| ENSMUSG00000059657 | 54.27   | 8.348 | 3.061  | 7.26185E-07 | 1.16403E-05 | Stfa21l   | stefin A2                                              | protein_coding                   | 20862     | -       |
| ENSMUSG00000059743 | 14.07   | 0.247 | -2.016 | 0.000459238 | 0.002242402 | Fdps      | farnesyl diphosphate synthetase                        | protein_coding                   | 110196    | -       |
| ENSMUSG00000059775 | 93.08   | 0.247 | -2.017 | 0.001205873 | 0.004914569 | Rps26-ps1 | -                                                      | transcribed_processed_pseudogene | -         | -       |
| ENSMUSG00000059852 | 20.91   | 4.091 | 2.032  | 2.38815E-05 | 0.000204931 | Kcng2     | potassium voltage-gated channel, subfamily G, member 2 | protein_coding                   | 240444    | -       |
| ENSMUSG00000059854 | 38.89   | 4.969 | 2.313  | 2.59691E-05 | 0.000219491 | Hydin     | HYDIN, axonemal central pair apparatus protein         | protein_coding                   | 244653    | -       |
| ENSMUSG00000059900 | 671.46  | 4.92  | 2.299  | 6.1991E-08  | 1.50124E-06 | Tmem40    | transmembrane protein 40                               | protein_coding                   | 94346     | -       |
| ENSMUSG00000059921 | 34.77   | 4.006 | 2.002  | 1.28846E-05 | 0.000123282 | Unc5c     | unc-5 netrin receptor C                                | protein_coding                   | 22253     | -       |
| ENSMUSG00000059994 | 89.67   | 0.076 | -3.712 | 5.20027E-17 | 1.98816E-14 | Fcrl1     | Fc receptor-like 1                                     | protein_coding                   | 229499    | -       |
| ENSMUSG00000060093 | 31.23   | 5.241 | 2.39   | 7.747E-06   | 8.11696E-05 | Hist1h4a  | histone cluster 1, H4a                                 | protein_coding                   | 326619    | -       |
| ENSMUSG00000060180 | 10.23   | 5.299 | 2.406  | 9.14019E-05 | 0.000605829 | Myh13     | myosin, heavy polypeptide 13, skeletal muscle          | protein_coding                   | 544791    | -       |
| ENSMUSG00000060198 | 18.47   | 0.126 | -2.99  | 2.43952E-08 | 7.02496E-07 | Gm11353   | -                                                      | processed_pseudogene             | -         | -       |
| ENSMUSG00000060206 | 25.65   | 9.068 | 3.181  | 6.17099E-08 | 1.49644E-06 | Zfp462    | zinc finger protein 462                                | protein_coding                   | 242466    | -       |

|                    |        |       |        |             |             |            |                                                                             |                      |        |         |
|--------------------|--------|-------|--------|-------------|-------------|------------|-----------------------------------------------------------------------------|----------------------|--------|---------|
| ENSMUSG00000060257 | 7.84   | 7.49  | 2.905  | 0.000239468 | 0.001319129 | Scrt2      | scratch family zinc finger 2                                                | protein_coding       | 545474 | zf-C2H2 |
| ENSMUSG00000060261 | 127.84 | 0.23  | -2.122 | 1.02476E-08 | 3.54115E-07 | Gtf2i      | general transcription factor II I                                           | protein_coding       | 14886  | GTF2I   |
| ENSMUSG00000060377 | 12.94  | 0.122 | -3.036 | 5.57562E-05 | 0.000406609 | Rpl36a-ps1 | -                                                                           | processed_pseudogene | -      | -       |
| ENSMUSG00000060424 | 7.99   | 4.74  | 2.245  | 0.009415303 | 0.025833498 | Pantr1     | POU domain, class 3, transcription factor 3 adjacent noncoding transcript 1 | lincRNA              | 66297  | -       |
| ENSMUSG00000060438 | 31.81  | 0.149 | -2.746 | 3.00595E-07 | 5.65591E-06 | Rps10-ps1  | -                                                                           | processed_pseudogene | -      | -       |
| ENSMUSG00000060445 | 13.91  | 4.347 | 2.12   | 0.000144072 | 0.000879358 | Sycp2      | synaptonemal complex protein 2                                              | protein_coding       | 320558 | -       |
| ENSMUSG00000060509 | 17.33  | 4.921 | 2.299  | 0.000232539 | 0.001290854 | Xcr1       | chemokine (C motif) receptor 1                                              | protein_coding       | 23832  | -       |
| ENSMUSG00000060586 | 527.99 | 0.023 | -5.473 | 5.85179E-23 | 4.57177E-20 | H2-Eb1     | histocompatibility 2, class II antigen E beta                               | protein_coding       | 14969  | -       |
| ENSMUSG00000060678 | 65.93  | 5.989 | 2.582  | 1.29656E-10 | 8.82492E-09 | Hist1h4c   | histone cluster 1, H4c                                                      | protein_coding       | 319155 | -       |
| ENSMUSG00000060730 | 6.04   | 0.188 | -2.411 | 0.002572003 | 0.009069138 | Gm10086    | -                                                                           | processed_pseudogene | -      | -       |
| ENSMUSG00000060739 | 158.01 | 0.182 | -2.461 | 3.42176E-12 | 3.99257E-10 | Nsa2       | NSA2 ribosome biogenesis homolog                                            | protein_coding       | 59050  | -       |
| ENSMUSG00000060798 | 10.99  | 6.094 | 2.607  | 2.60525E-05 | 0.000219922 | Intu       | inturned planar cell polarity protein                                       | protein_coding       | 380614 | -       |
| ENSMUSG00000060882 | 40.09  | 4.328 | 2.114  | 2.9857E-06  | 3.73031E-05 | Kcnd2      | potassium voltage-gated channel, Shal-related family, member 2              | protein_coding       | 16508  | -       |
| ENSMUSG00000060924 | 122.98 | 3.999 | 2      | 8.11711E-09 | 2.89398E-07 | Csmd1      | CUB and Sushi multiple domains 1                                            | protein_coding       | 94109  | -       |
| ENSMUSG00000060950 | 10.4   | 0.131 | -2.935 | 2.22284E-05 | 0.000193144 | Trmt61a    | tRNA methyltransferase 61A                                                  | protein_coding       | 328162 | -       |
| ENSMUSG00000060985 | 7.2    | 4.776 | 2.256  | 0.008265763 | 0.02326923  | Tdrd5      | tudor domain containing 5                                                   | protein_coding       | 214575 | -       |
| ENSMUSG00000061032 | 70.5   | 0.187 | -2.42  | 2.99821E-11 | 2.55331E-09 | Rrp1       | ribosomal RNA processing 1 homolog (S. cerevisiae)                          | protein_coding       | 18114  | -       |
| ENSMUSG00000061082 | 13.02  | 5.221 | 2.384  | 0.00130678  | 0.005250788 | Plac1      | placental specific protein 1                                                | protein_coding       | 56096  | -       |
| ENSMUSG00000061132 | 59.22  | 0.144 | -2.797 | 1.89107E-13 | 3.39806E-11 | Blnk       | B cell linker                                                               | protein_coding       | 17060  | -       |
| ENSMUSG00000061143 | 68.24  | 4.119 | 2.042  | 1.46154E-09 | 7.17553E-08 | Maml3      | mastermind like transcriptional coactivator 3                               | protein_coding       | 433586 | -       |
| ENSMUSG00000061167 | 275.18 | 0.202 | -2.31  | 2.24801E-12 | 2.80517E-10 | Rpl15-ps3  | -                                                                           | processed_pseudogene | -      | -       |
| ENSMUSG00000061171 | 6.2    | 5.189 | 2.375  | 0.010090019 | 0.027297132 | Slc38a11   | solute carrier family 38, member 11                                         | protein_coding       | 320106 | -       |
| ENSMUSG00000061315 | 305.7  | 0.175 | -2.515 | 2.42687E-11 | 2.1482E-09  | Naca       | nascent polypeptide-associated complex alpha polypeptide                    | protein_coding       | 17938  | -       |
| ENSMUSG00000061330 | 37.38  | 0.052 | -4.264 | 2.17046E-15 | 6.00016E-13 | Gm11361    | -                                                                           | processed_pseudogene | -      | -       |

|                        |       |        |        |             |             |                   |                                                 |                      |        |         |
|------------------------|-------|--------|--------|-------------|-------------|-------------------|-------------------------------------------------|----------------------|--------|---------|
| ENSMUSG00000<br>061393 | 8.84  | 5.144  | 2.363  | 0.000156699 | 0.00093795  | Acvr2b            | activin receptor IIB                            | protein_coding       | 11481  | -       |
| ENSMUSG00000<br>061410 | 16.86 | 6.204  | 2.633  | 3.92351E-07 | 7.03609E-06 | Zcchc14           | zinc finger, CCHC domain containing 14          | protein_coding       | 142682 | -       |
| ENSMUSG00000<br>061411 | 54.11 | 5.792  | 2.534  | 2.09694E-09 | 9.7364E-08  | No14l1            | nucleolar protein 4-like                        | protein_coding       | 329540 | -       |
| ENSMUSG00000<br>061535 | 8.73  | 4.513  | 2.174  | 0.000943674 | 0.004020122 | C1qtnf7           | C1q and tumor necrosis factor related protein 7 | protein_coding       | 109323 | -       |
| ENSMUSG00000<br>061576 | 71.47 | 4.208  | 2.073  | 1.1798E-07  | 2.56036E-06 | Dpp6              | dipeptidylpeptidase 6                           | protein_coding       | 13483  | -       |
| ENSMUSG00000<br>061577 | 15.42 | 0.149  | -2.751 | 6.40586E-06 | 6.9509E-05  | Adgrg5            | adhesion G protein-coupled receptor G5          | protein_coding       | 382045 | -       |
| ENSMUSG00000<br>061778 | 12.48 | 0.179  | -2.485 | 4.90617E-05 | 0.000367482 | Mospd2            | motile sperm domain containing 2                | protein_coding       | 76763  | -       |
| ENSMUSG00000<br>061815 | 10.85 | 4.114  | 2.041  | 0.004266888 | 0.013696268 | Rufy4             | RUN and FYVE domain containing 4                | protein_coding       | 435626 | -       |
| ENSMUSG00000<br>061878 | 8.57  | 5.857  | 2.55   | 0.006248343 | 0.018641287 | Sphk1             | sphingosine kinase 1                            | protein_coding       | 20698  | -       |
| ENSMUSG00000<br>061911 | 28.75 | 4.771  | 2.254  | 1.48804E-05 | 0.000139046 | Myt1l             | myelin transcription factor 1-like              | protein_coding       | 17933  | zf-C2HC |
| ENSMUSG00000<br>061928 | 6.63  | 107.53 | 6.749  | 1.79755E-10 | 1.16187E-08 | Dsg1b             | desmoglein 1 beta                               | protein_coding       | 225256 | -       |
| ENSMUSG00000<br>062014 | 53.78 | 0.19   | -2.398 | 8.28714E-11 | 6.25679E-09 | Gmfb              | glia maturation factor, beta                    | protein_coding       | 63985  | -       |
| ENSMUSG00000<br>062038 | 5.49  | 0.198  | -2.338 | 0.011629719 | 0.030583115 | Gm10108           | -                                               | processed_pseudogene | -      | -       |
| ENSMUSG00000<br>062044 | 5.52  | 8.908  | 3.155  | 0.000496416 | 0.002379343 | Lmtk3             | lemur tyrosine kinase 3                         | protein_coding       | 381983 | -       |
| ENSMUSG00000<br>062098 | 31.23 | 5.163  | 2.368  | 9.15818E-06 | 9.29355E-05 | Btbd3             | BTB (POZ) domain containing 3                   | protein_coding       | 228662 | -       |
| ENSMUSG00000<br>062151 | 36.17 | 5.156  | 2.366  | 4.99746E-05 | 0.000372302 | Unc13c            | unc-13 homolog C                                | protein_coding       | 208898 | -       |
| ENSMUSG00000<br>062184 | 28.99 | 5.486  | 2.456  | 4.82255E-06 | 5.51952E-05 | Hs6st2            | heparan sulfate 6-O-sulfotransferase 2          | protein_coding       | 50786  | -       |
| ENSMUSG00000<br>062372 | 11.1  | 4.085  | 2.03   | 0.001606204 | 0.0062122   | Otof              | otoferlin                                       | protein_coding       | 83762  | -       |
| ENSMUSG00000<br>062391 | 4.79  | 7.096  | 2.827  | 0.01263793  | 0.032608113 | 4932435O22R<br>ik | RIKEN cDNA 4932435O22 gene                      | lincRNA              | 319819 | -       |
| ENSMUSG00000<br>062393 | 9.86  | 7.146  | 2.837  | 0.0004555   | 0.002229607 | Dgkk              | diacylglycerol kinase kappa                     | protein_coding       | 331374 | -       |
| ENSMUSG00000<br>062456 | 21.37 | 0.246  | -2.02  | 0.000155783 | 0.000933399 | Rpl9-ps6          | -                                               | protein_coding       | -      | -       |
| ENSMUSG00000<br>062458 | 55.26 | 0.219  | -2.191 | 2.07225E-08 | 6.20606E-07 | Gm8623            | predicted gene 8623                             | processed_pseudogene | 667422 | -       |
| ENSMUSG00000<br>062545 | 4.9   | 0.11   | -3.178 | 0.000885246 | 0.003817372 | Tlr12             | toll-like receptor 12                           | protein_coding       | 384059 | -       |
| ENSMUSG00000<br>062554 | 17.92 | 0.213  | -2.229 | 0.000127433 | 0.000794258 | Gm12751           | -                                               | processed_pseudogene | -      | -       |

|                        |         |        |        |             |             |                   |                                                                                 |                      |        |   |
|------------------------|---------|--------|--------|-------------|-------------|-------------------|---------------------------------------------------------------------------------|----------------------|--------|---|
| ENSMUSG00000<br>062580 | 16.99   | 0.186  | -2.427 | 1.12447E-05 | 0.000110293 | Timm17a           | translocase of inner mitochondrial membrane 17a                                 | protein_coding       | 21854  | - |
| ENSMUSG00000<br>062582 | 7.66    | 0.224  | -2.158 | 0.006663898 | 0.019596863 | Rpl30-ps8         | -                                                                               | processed_pseudogene | -      | - |
| ENSMUSG00000<br>062683 | 91.25   | 0.198  | -2.336 | 1.50329E-10 | 9.9311E-09  | Atp5g2            | ATP synthase, H+ transporting, mitochondrial F0 complex, subunit C2 (subunit 9) | protein_coding       | 67942  | - |
| ENSMUSG00000<br>062713 | 6.97    | 5.482  | 2.455  | 0.001482102 | 0.005815317 | Sim2              | single-minded family bHLH transcription factor 2                                | protein_coding       | 20465  | - |
| ENSMUSG00000<br>062727 | 254.63  | 4.952  | 2.308  | 2.84467E-12 | 3.40773E-10 | Hist1h2bk         | histone cluster 1, H2bk                                                         | protein_coding       | 319184 | - |
| ENSMUSG00000<br>062760 | 9.8     | 4.338  | 2.117  | 0.001127188 | 0.004657265 | 1810041L15R<br>ik | shisa like 1                                                                    | protein_coding       | 72301  | - |
| ENSMUSG00000<br>062866 | 40.17   | 4.089  | 2.032  | 7.53483E-07 | 1.19711E-05 | Phactr2           | phosphatase and actin regulator 2                                               | protein_coding       | 215789 | - |
| ENSMUSG00000<br>062867 | 45.53   | 0.12   | -3.063 | 2.53088E-12 | 3.13637E-10 | Impdh2            | inosine monophosphate dehydrogenase 2                                           | protein_coding       | 23918  | - |
| ENSMUSG00000<br>062906 | 26.45   | 0.185  | -2.433 | 6.49085E-06 | 7.00356E-05 | Hdac10            | histone deacetylase 10                                                          | protein_coding       | 170787 | - |
| ENSMUSG00000<br>062960 | 10.6    | 12.797 | 3.678  | 6.32364E-05 | 0.000448951 | Kdr               | kinase insert domain protein receptor                                           | protein_coding       | 16542  | - |
| ENSMUSG00000<br>062961 | 5.9     | 6.695  | 2.743  | 0.002330368 | 0.008401763 | Ccdc177           | coiled-coil domain containing 177                                               | protein_coding       | 380768 | - |
| ENSMUSG00000<br>062995 | 16.59   | 5.221  | 2.384  | 0.000138995 | 0.000853006 | Ica1              | islet cell autoantigen 1                                                        | protein_coding       | 15893  | - |
| ENSMUSG00000<br>063239 | 21.01   | 5.932  | 2.568  | 5.79217E-06 | 6.4049E-05  | Grm4              | glutamate receptor, metabotropic 4                                              | protein_coding       | 268934 | - |
| ENSMUSG00000<br>063260 | 8.28    | 4.378  | 2.13   | 0.004153935 | 0.013391114 | Syt10             | synaptotagmin X                                                                 | protein_coding       | 54526  | - |
| ENSMUSG00000<br>063275 | 31.1    | 4.414  | 2.142  | 1.14262E-07 | 2.4887E-06  | Hacd1             | 3-hydroxyacyl-CoA dehydratase 1                                                 | protein_coding       | 30963  | - |
| ENSMUSG00000<br>063296 | 40.02   | 7.121  | 2.832  | 1.98981E-09 | 9.43401E-08 | Tmem117           | transmembrane protein 117                                                       | protein_coding       | 320709 | - |
| ENSMUSG00000<br>063297 | 24.66   | 4.284  | 2.099  | 2.95771E-05 | 0.000243459 | Luzp2             | leucine zipper protein 2                                                        | protein_coding       | 233271 | - |
| ENSMUSG00000<br>063354 | 53.32   | 4.076  | 2.027  | 5.35994E-08 | 1.33582E-06 | Slc39a4           | solute carrier family 39 (zinc transporter), member 4                           | protein_coding       | 72027  | - |
| ENSMUSG00000<br>063362 | 11.76   | 0.112  | -3.161 | 1.53464E-06 | 2.15394E-05 | Alg11             | asparagine-linked glycosylation 11 (alpha-1,2-mannosyltransferase)              | protein_coding       | 207958 | - |
| ENSMUSG00000<br>063412 | 14.91   | 0.035  | -4.83  | 2.52567E-09 | 1.14029E-07 | Gm10131           | -                                                                               | protein_coding       | -      | - |
| ENSMUSG00000<br>063445 | 8.51    | 0.157  | -2.669 | 0.00082335  | 0.003600579 | Nmral1            | NmrA-like family domain containing 1                                            | protein_coding       | 67824  | - |
| ENSMUSG00000<br>063457 | 1539.02 | 0.24   | -2.057 | 4.66135E-08 | 1.1864E-06  | Rps15             | ribosomal protein S15                                                           | protein_coding       | 20054  | - |
| ENSMUSG00000<br>063480 | 43.41   | 0.163  | -2.613 | 3.18834E-09 | 1.36084E-07 | Snu13             | SNU13 homolog, small nuclear ribonucleoprotein (U4/U6.U5)                       | protein_coding       | 20826  | - |
| ENSMUSG00000<br>063558 | 6.03    | 7.186  | 2.845  | 0.001292949 | 0.005204524 | Aox1              | aldehyde oxidase 1                                                              | protein_coding       | 11761  | - |

|                        |              |       |        |             |             |            |                                                                         |                      |        |     |
|------------------------|--------------|-------|--------|-------------|-------------|------------|-------------------------------------------------------------------------|----------------------|--------|-----|
| ENSMUSG00000<br>063632 | 8.45         | 8.943 | 3.161  | 5.93197E-06 | 6.51538E-05 | Sox11      | SRY (sex determining region Y)-box 11                                   | protein_coding       | 20666  | HMG |
| ENSMUSG00000<br>063787 | 18.83        | 0.188 | -2.412 | 8.47352E-05 | 0.000570188 | Chchd1     | coiled-coil-helix-coiled-coil-helix domain containing 1                 | protein_coding       | 66121  | -   |
| ENSMUSG00000<br>063802 | 17.08        | 0.218 | -2.196 | 0.000237522 | 0.001311223 | Hspbp1     | HSPA (heat shock 70kDa) binding protein, cytoplasmic cochaperone 1      | protein_coding       | 66245  | -   |
| ENSMUSG00000<br>063816 | 2.36         | 0.139 | -2.852 | 0.01678472  | 0.040901089 | Gm4987     | -                                                                       | processed_pseudogene | -      | -   |
| ENSMUSG00000<br>063838 | 258.31       | 5.382 | 2.428  | 5.76882E-09 | 2.22925E-07 | Cdc42ep5   | CDC42 effector protein (Rho GTPase binding) 5                           | protein_coding       | 58804  | -   |
| ENSMUSG00000<br>063873 | 109.9        | 4.373 | 2.129  | 6.08925E-09 | 2.31817E-07 | Slc24a3    | solute carrier family 24 (sodium/potassium/calcium exchanger), member 3 | protein_coding       | 94249  | -   |
| ENSMUSG00000<br>063875 | 14.14        | 0.109 | -3.199 | 4.89692E-08 | 1.23412E-06 | Rps6-ps1   | -                                                                       | processed_pseudogene | -      | -   |
| ENSMUSG00000<br>063932 | 7.16         | 5.184 | 2.374  | 0.004515711 | 0.014285706 | Poteg      | POTE ankyrin domain family, member G                                    | protein_coding       | 70952  | -   |
| ENSMUSG00000<br>064023 | 41.92        | 0.093 | -3.421 | 6.2342E-13  | 9.74108E-11 | Klk8       | kallikrein related-peptidase 8                                          | protein_coding       | 259277 | -   |
| ENSMUSG00000<br>064030 | 44.25        | 0.248 | -2.012 | 7.77726E-08 | 1.81258E-06 | Pym1       | PYM homolog 1, exon junction complex associated factor                  | protein_coding       | 78428  | -   |
| ENSMUSG00000<br>064032 | 13.66        | 0.183 | -2.453 | 0.000134183 | 0.000829711 | Gm10143    | -                                                                       | processed_transcript | -      | -   |
| ENSMUSG00000<br>064037 | 15.04        | 0.103 | -3.278 | 1.23174E-07 | 2.65068E-06 | Gpn1       | GPN-loop GTPase 1                                                       | protein_coding       | 74254  | -   |
| ENSMUSG00000<br>064179 | 19.3         | 5.45  | 2.446  | 1.13293E-05 | 0.00011088  | Tnt1       | troponin T1, skeletal, slow                                             | protein_coding       | 21955  | -   |
| ENSMUSG00000<br>064220 | 521.04       | 4.153 | 2.054  | 2.18827E-06 | 2.88067E-05 | Hist2h2aa1 | histone cluster 2, H2aa1                                                | protein_coding       | 15267  | -   |
| ENSMUSG00000<br>064246 | 132.43       | 4.459 | 2.157  | 2.53045E-05 | 0.000214783 | Chil1      | chitinase-like 1                                                        | protein_coding       | 12654  | -   |
| ENSMUSG00000<br>064262 | 110.34       | 0.138 | -2.857 | 6.01829E-09 | 2.30091E-07 | Gimap8     | GTPase, IMAP family member 8                                            | protein_coding       | 243374 | -   |
| ENSMUSG00000<br>064267 | 208.18       | 0.079 | -3.656 | 4.25574E-21 | 2.63694E-18 | Hvcn1      | hydrogen voltage-gated channel 1                                        | protein_coding       | 74096  | -   |
| ENSMUSG00000<br>064329 | 13.26        | 4.218 | 2.077  | 0.002697502 | 0.009421071 | Scn1a      | sodium channel, voltage-gated, type I, alpha                            | protein_coding       | 20265  | -   |
| ENSMUSG00000<br>064337 | 24319.5<br>2 | 6.158 | 2.622  | 1.30652E-06 | 1.88187E-05 | mt-Rnr1    | -                                                                       | Mt_rRNA              | -      | -   |
| ENSMUSG00000<br>064339 | 50411.3<br>9 | 5.445 | 2.445  | 4.91424E-05 | 0.000367805 | mt-Rnr2    | -                                                                       | Mt_rRNA              | -      | -   |
| ENSMUSG00000<br>064347 | 6.37         | 0.223 | -2.165 | 0.007904494 | 0.022449164 | mt-Ta      | -                                                                       | Mt_tRNA              | -      | -   |
| ENSMUSG00000<br>064348 | 9.37         | 0.249 | -2.004 | 0.008347016 | 0.023450208 | mt-Tn      | -                                                                       | Mt_tRNA              | -      | -   |
| ENSMUSG00000<br>064767 | 13.57        | 0.005 | -7.747 | 2.35442E-11 | 2.1048E-09  | Snord35b   | small nucleolar RNA, C/D box 35B                                        | snoRNA               | 27212  | -   |
| ENSMUSG00000<br>065876 | 18.15        | 8.055 | 3.01   | 1.58093E-05 | 0.000146206 | Gm25682    | -                                                                       | snRNA                | -      | -   |



|                    |        |       |        |             |             |           |                                                      |                                  |           |          |
|--------------------|--------|-------|--------|-------------|-------------|-----------|------------------------------------------------------|----------------------------------|-----------|----------|
| ENSMUSG00000065968 | 6.17   | 7.069 | 2.822  | 0.000905171 | 0.003886503 | Ifitm7    | interferon induced transmembrane protein 7           | protein_coding                   | 74482     | -        |
| ENSMUSG00000065979 | 37.85  | 6.534 | 2.708  | 4.77757E-09 | 1.8993E-07  | Cpped1    | calcineurin-like phosphoesterase domain containing 1 | protein_coding                   | 223978    | -        |
| ENSMUSG00000065999 | 8.74   | 0.186 | -2.426 | 0.004254289 | 0.013658266 | Zfp985    | zinc finger protein 985                              | protein_coding                   | 433804    | zf-C2H2  |
| ENSMUSG00000066026 | 62.61  | 5.085 | 2.346  | 1.78035E-08 | 5.46857E-07 | Dhrs3     | dehydrogenase/reductase (SDR family) member 3        | protein_coding                   | 20148     | -        |
| ENSMUSG00000066108 | 7.28   | 8.001 | 3      | 0.000136506 | 0.00084147  | Muc5b     | mucin 5, subtype B, tracheobronchial                 | protein_coding                   | 74180     | -        |
| ENSMUSG00000066189 | 10.71  | 4.047 | 2.017  | 0.00288398  | 0.009946686 | Cacng3    | calcium channel, voltage-dependent, gamma subunit 3  | protein_coding                   | 54376     | -        |
| ENSMUSG00000066357 | 25.13  | 0.088 | -3.505 | 3.24214E-09 | 1.37078E-07 | Wdr6      | WD repeat domain 6                                   | protein_coding                   | 83669     | -        |
| ENSMUSG00000066477 | 5.27   | 9.115 | 3.188  | 0.000333951 | 0.001727337 | Gm16551   | predicted gene 16551                                 | processed_transcript             | 100503019 | -        |
| ENSMUSG00000066538 | 20.41  | 0.208 | -2.264 | 0.000295283 | 0.001561032 | Gm6254    | -                                                    | processed_pseudogene             | -         | -        |
| ENSMUSG00000066621 | 89.84  | 0.231 | -2.115 | 8.27975E-10 | 4.33786E-08 | Tecpr1    | tectonin beta-propeller repeat containing 1          | protein_coding                   | 70381     | -        |
| ENSMUSG00000066629 | 16.91  | 0.196 | -2.354 | 0.000285483 | 0.001517707 | Rpl36-ps3 | -                                                    | processed_pseudogene             | -         | -        |
| ENSMUSG00000066677 | 46.02  | 0.147 | -2.764 | 1.46729E-06 | 2.08096E-05 | Ifi208    | interferon activated gene 208                        | protein_coding                   | 100033459 | -        |
| ENSMUSG00000066724 | 37.19  | 0.193 | -2.374 | 2.99152E-07 | 5.64057E-06 | Gm10175   | -                                                    | transcribed_processed_pseudogene | -         | -        |
| ENSMUSG00000066760 | 6.96   | 8.679 | 3.118  | 0.000144302 | 0.000880463 | Psg16     | pregnancy specific glycoprotein 16                   | protein_coding                   | 26436     | -        |
| ENSMUSG00000066772 | 8.67   | 4.706 | 2.235  | 0.007517402 | 0.021588651 | Obox3     | oocyte specific homeobox 3                           | protein_coding                   | 246791    | Homeobox |
| ENSMUSG00000066838 | 4.24   | 0.131 | -2.933 | 0.003789554 | 0.01241694  | Zfp772    | zinc finger protein 772                              | protein_coding                   | 232855    | zf-C2H2  |
| ENSMUSG00000066842 | 35.61  | 4.791 | 2.26   | 0.000101197 | 0.000659803 | Hmcn1     | hemacentin 1                                         | protein_coding                   | 545370    | -        |
| ENSMUSG00000067085 | 130.02 | 4.371 | 2.128  | 5.21074E-09 | 2.04436E-07 | Gm10197   | -                                                    | protein_coding                   | -         | -        |
| ENSMUSG00000067121 | 36.51  | 0.224 | -2.158 | 8.16233E-09 | 2.90433E-07 | Gm7027    | -                                                    | processed_pseudogene             | -         | -        |
| ENSMUSG00000067148 | 38.04  | 0.118 | -3.082 | 1.77535E-10 | 1.15585E-08 | Polr1c    | polymerase (RNA) I polypeptide C                     | protein_coding                   | 20016     | -        |
| ENSMUSG00000067149 | 107.56 | 0.072 | -3.787 | 4.05923E-07 | 7.23538E-06 | Jchain    | immunoglobulin joining chain                         | protein_coding                   | 16069     | -        |
| ENSMUSG00000067158 | 12.53  | 5.289 | 2.403  | 3.95385E-05 | 0.000308228 | Col4a4    | collagen, type IV, alpha 4                           | protein_coding                   | 12829     | -        |
| ENSMUSG00000067261 | 10.66  | 7.001 | 2.808  | 0.000158192 | 0.000943742 | Foxd3     | forkhead box D3                                      | protein_coding                   | 15221     | Fork     |
| ENSMUSG00000067341 | 31.27  | 0.016 | -5.934 | 3.53027E-19 | 1.71447E-16 | H2-Eb2    | histocompatibility 2, class II antigen E beta2       | protein_coding                   | 381091    | -        |

|                        |         |       |        |             |             |                   |                                                            |                                          |        |          |
|------------------------|---------|-------|--------|-------------|-------------|-------------------|------------------------------------------------------------|------------------------------------------|--------|----------|
| ENSMUSG00000<br>067344 | 54.26   | 0.171 | -2.544 | 1.16124E-10 | 8.11792E-09 | Rps25-ps1         | -                                                          | processed_pseud<br>ogene                 | -      | -        |
| ENSMUSG00000<br>067438 | 12.63   | 7.838 | 2.97   | 9.29858E-06 | 9.40271E-05 | Hmx1              | H6 homeobox 1                                              | protein_coding                           | 15371  | Homeobox |
| ENSMUSG00000<br>067547 | 20.59   | 0.143 | -2.806 | 4.98403E-07 | 8.57836E-06 | Gm7666            | -                                                          | transcribed_proc<br>essed_pseudogen<br>e | -      | -        |
| ENSMUSG00000<br>067599 | 7.97    | 0.24  | -2.062 | 0.020921668 | 0.048779221 | Klra7             | killer cell lectin-like receptor,<br>subfamily A, member 7 | protein_coding                           | 16638  | -        |
| ENSMUSG00000<br>067614 | 8.7     | 5.552 | 2.473  | 0.003668856 | 0.012092017 | Krt86             | keratin 86                                                 | protein_coding                           | 16679  | -        |
| ENSMUSG00000<br>067702 | 4.12    | 0.015 | -6.087 | 1.6566E-05  | 0.00015203  | Tuba3a            | tubulin, alpha 3A                                          | protein_coding                           | 22144  | -        |
| ENSMUSG00000<br>067724 | 4.36    | 6.033 | 2.593  | 0.006745894 | 0.01976471  | Gbx1              | gastrulation brain homeobox 1                              | protein_coding                           | 231044 | Homeobox |
| ENSMUSG00000<br>067818 | 2136.32 | 5.096 | 2.349  | 1.08827E-05 | 0.00010721  | Myl9              | myosin, light polypeptide 9,<br>regulatory                 | protein_coding                           | 98932  | -        |
| ENSMUSG00000<br>067825 | 8.51    | 0.126 | -2.993 | 0.000155926 | 0.000933944 | Pex26             | peroxisomal biogenesis factor 26                           | protein_coding                           | 74043  | -        |
| ENSMUSG00000<br>068079 | 6.62    | 6.404 | 2.679  | 0.013787121 | 0.034873419 | Tcf15             | transcription factor 15                                    | protein_coding                           | 21407  | bHLH     |
| ENSMUSG00000<br>068105 | 57.15   | 0.066 | -3.923 | 1.80699E-16 | 6.24418E-14 | Tnfrsf13c         | tumor necrosis factor receptor<br>superfamily, member 13c  | protein_coding                           | 72049  | -        |
| ENSMUSG00000<br>068120 | 35.59   | 0.17  | -2.554 | 1.21448E-08 | 4.03384E-07 | Gm10231           | -                                                          | processed_pseud<br>ogene                 | -      | -        |
| ENSMUSG00000<br>068129 | 18.47   | 0.155 | -2.687 | 7.25176E-07 | 1.16345E-05 | Cst7              | cystatin F (leukocystatin)                                 | protein_coding                           | 13011  | -        |
| ENSMUSG00000<br>068165 | 11.99   | 0.184 | -2.439 | 0.000680952 | 0.003075924 | Gm10233           | -                                                          | processed_pseud<br>ogene                 | -      | -        |
| ENSMUSG00000<br>068180 | 4.58    | 4.169 | 2.06   | 0.005663262 | 0.017215896 | AY512915          | cDNA sequence AY512915                                     | processed_transc<br>ript                 | 414067 | -        |
| ENSMUSG00000<br>068196 | 11.81   | 4.147 | 2.052  | 0.002688623 | 0.009402856 | Col8a1            | collagen, type VIII, alpha 1                               | protein_coding                           | 12837  | -        |
| ENSMUSG00000<br>068245 | 13.13   | 0.141 | -2.823 | 0.000107557 | 0.00069322  | Phf11d            | PHD finger protein 11D                                     | protein_coding                           | 219132 | -        |
| ENSMUSG00000<br>068270 | 18.32   | 5.761 | 2.526  | 5.29405E-07 | 9.00842E-06 | Shroom4           | shroom family member 4                                     | protein_coding                           | 208431 | -        |
| ENSMUSG00000<br>068463 | 16.84   | 0.191 | -2.385 | 5.93305E-05 | 0.000426956 | B630019A10<br>Rik | -                                                          | processed_transc<br>ript                 | -      | -        |
| ENSMUSG00000<br>068580 | 14.23   | 0.218 | -2.199 | 6.44715E-05 | 0.000456457 | Zfyve19           | zinc finger, FYVE domain<br>containing 19                  | protein_coding                           | 72008  | -        |
| ENSMUSG00000<br>068587 | 20.72   | 4.251 | 2.088  | 5.77009E-05 | 0.000418244 | Mgam              | maltase-glucoamylase                                       | protein_coding                           | 232714 | -        |
| ENSMUSG00000<br>068686 | 74.06   | 4.364 | 2.126  | 7.57845E-09 | 2.74551E-07 | Cd59b             | CD59b antigen                                              | protein_coding                           | 333883 | -        |
| ENSMUSG00000<br>068735 | 66.45   | 0.064 | -3.968 | 2.27247E-16 | 7.70452E-14 | Trp53i11          | transformation related protein 53<br>inducible protein 11  | protein_coding                           | 277414 | -        |
| ENSMUSG00000<br>068744 | 22.12   | 6.779 | 2.761  | 3.09383E-08 | 8.51347E-07 | Psrc1             | proline/serine-rich coiled-coil 1                          | protein_coding                           | 56742  | -        |

|                        |        |       |        |             |             |           |                                                                                       |                                          |               |         |
|------------------------|--------|-------|--------|-------------|-------------|-----------|---------------------------------------------------------------------------------------|------------------------------------------|---------------|---------|
| ENSMUSG00000<br>068747 | 67     | 4.451 | 2.154  | 1.05983E-08 | 3.62055E-07 | Sort1     | sortilin 1                                                                            | protein_coding                           | 20661         | -       |
| ENSMUSG00000<br>068794 | 11.94  | 4.226 | 2.079  | 0.000219386 | 0.001232305 | Col28a1   | collagen, type XXVIII, alpha 1                                                        | protein_coding                           | 213945        | -       |
| ENSMUSG00000<br>068893 | 126.92 | 0.146 | -2.775 | 2.34543E-17 | 9.16197E-15 | Sprr2a2   | small proline-rich protein 2A2                                                        | protein_coding                           | 100303<br>744 | -       |
| ENSMUSG00000<br>068922 | 26.97  | 0.176 | -2.507 | 8.76403E-06 | 8.99376E-05 | Msto1     | misato 1, mitochondrial distribution<br>and morphology regulator                      | protein_coding                           | 229524        | -       |
| ENSMUSG00000<br>068962 | 8.11   | 4.144 | 2.051  | 0.005113931 | 0.015835296 | Zfp114    | zinc finger protein 114                                                               | protein_coding                           | 232966        | zf-C2H2 |
| ENSMUSG00000<br>068964 | 3.56   | 0.175 | -2.517 | 0.016492349 | 0.040289505 | Gm6361    | -                                                                                     | pseudogene                               | -             | -       |
| ENSMUSG00000<br>069014 | 5.99   | 0.193 | -2.371 | 0.006654182 | 0.019575801 | Gm5641    | -                                                                                     | transcribed_proc<br>essed_pseudogen<br>e | -             | -       |
| ENSMUSG00000<br>069072 | 13.23  | 6.757 | 2.756  | 0.000294141 | 0.001556365 | Slc7a14   | solute carrier family 7 (cationic<br>amino acid transporter, y+ system),<br>member 14 | protein_coding                           | 241919        | -       |
| ENSMUSG00000<br>069117 | 372.45 | 0.096 | -3.388 | 1.13148E-12 | 1.63965E-10 | Gm10260   | -                                                                                     | protein_coding                           | -             | -       |
| ENSMUSG00000<br>069270 | 64.04  | 4.295 | 2.103  | 2.02403E-06 | 2.70207E-05 | Hist1h2ac | histone cluster 1, H2ac                                                               | protein_coding                           | 319164        | -       |
| ENSMUSG00000<br>069274 | 6.28   | 4.984 | 2.317  | 0.001260456 | 0.005102305 | Hist1h4f  | histone cluster 1, H4f                                                                | protein_coding                           | 319157        | -       |
| ENSMUSG00000<br>069303 | 423.16 | 5.219 | 2.384  | 2.49684E-10 | 1.51645E-08 | Hist1h2br | histone cluster 1 H2br                                                                | protein_coding                           | 665622        | -       |
| ENSMUSG00000<br>069306 | 134.11 | 6.073 | 2.602  | 5.66414E-08 | 1.40385E-06 | Hist1h4m  | histone cluster 1, H4m                                                                | protein_coding                           | 100041<br>230 | -       |
| ENSMUSG00000<br>069307 | 251.22 | 6.323 | 2.661  | 1.17189E-13 | 2.26046E-11 | Hist1h2bq | histone cluster 1, H2bq                                                               | protein_coding                           | 665596        | -       |
| ENSMUSG00000<br>069607 | 27.7   | 5.944 | 2.571  | 0.000901993 | 0.003875636 | Cd300d3   | CD300 molecule like family member<br>D3                                               | protein_coding                           | 382551        | -       |
| ENSMUSG00000<br>069609 | 20.99  | 6.459 | 2.691  | 0.000539264 | 0.00255001  | Cd300d4   | CD300 molecule like family member<br>D4                                               | protein_coding                           | 100043<br>123 | -       |
| ENSMUSG00000<br>070319 | 54.98  | 0.189 | -2.4   | 2.50411E-10 | 1.51645E-08 | Eif3g     | eukaryotic translation initiation<br>factor 3, subunit G                              | protein_coding                           | 53356         | -       |
| ENSMUSG00000<br>070343 | 44.76  | 0.224 | -2.156 | 8.83757E-09 | 3.10161E-07 | Gm10288   | -                                                                                     | processed_pseud<br>ogene                 | -             | -       |
| ENSMUSG00000<br>070366 | 13.36  | 6.118 | 2.613  | 0.000113596 | 0.000721532 | Plpp4     | phospholipid phosphatase 4                                                            | protein_coding                           | 381925        | -       |
| ENSMUSG00000<br>070392 | 541.21 | 4.053 | 2.019  | 1.53821E-06 | 2.15601E-05 | Gm20634   | -                                                                                     | processed_transc<br>ript                 | -             | -       |
| ENSMUSG00000<br>070495 | 3.78   | 4.67  | 2.223  | 0.014064441 | 0.035390553 | Ctcf1     | CCCTC-binding factor (zinc finger<br>protein)-like                                    | protein_coding                           | 664799        | zf-C2H2 |
| ENSMUSG00000<br>070501 | 67.64  | 0.049 | -4.36  | 9.46471E-21 | 5.48618E-18 | Ifi214    | interferon activated gene 214                                                         | protein_coding                           | 545384        | -       |
| ENSMUSG00000<br>070576 | 12.43  | 5.943 | 2.571  | 0.000207819 | 0.001177917 | Mn1       | meningioma 1                                                                          | protein_coding                           | 433938        | -       |

|                        |        |       |        |             |             |                    |                                                                                         |                                            |        |      |
|------------------------|--------|-------|--------|-------------|-------------|--------------------|-----------------------------------------------------------------------------------------|--------------------------------------------|--------|------|
| ENSMUSG00000<br>070683 | 5.04   | 6.145 | 2.619  | 0.000995627 | 0.004204566 | Lactb1l            | lactamase, beta-like 1                                                                  | protein_coding                             | 242707 | -    |
| ENSMUSG00000<br>070690 | 5.86   | 4.222 | 2.078  | 0.017487616 | 0.042281347 | 5830473C10R<br>ik  | RIKEN cDNA 5830473C10 gene                                                              | protein_coding                             | 622307 | -    |
| ENSMUSG00000<br>070720 | 5.92   | 4.418 | 2.143  | 0.005201015 | 0.016057911 | Tmem200b           | transmembrane protein 200B                                                              | protein_coding                             | 623230 | -    |
| ENSMUSG00000<br>070803 | 18.95  | 5.798 | 2.536  | 0.000515744 | 0.002460809 | Cited4             | Cbp/p300-interacting transactivator,<br>with Glu/Asp-rich carboxy-terminal<br>domain, 4 | protein_coding                             | 56222  | -    |
| ENSMUSG00000<br>070880 | 49.19  | 4.439 | 2.15   | 2.53845E-07 | 4.88116E-06 | Gad1               | glutamate decarboxylase 1                                                               | protein_coding                             | 14415  | -    |
| ENSMUSG00000<br>071141 | 50.26  | 0.128 | -2.969 | 8.48957E-11 | 6.3828E-09  | Rpl36a-ps3         | -                                                                                       | processed_pseud<br>ogene                   | -      | -    |
| ENSMUSG00000<br>071178 | 8.71   | 5.518 | 2.464  | 0.008124944 | 0.022962744 | Serpina1b          | serine (or cysteine) preptidase<br>inhibitor, clade A, member 1B                        | protein_coding                             | 20701  | -    |
| ENSMUSG00000<br>071302 | 11.74  | 0.192 | -2.379 | 0.002204001 | 0.008036463 | 2610044O15R<br>ik8 | RIKEN cDNA 2610044O15 gene                                                              | protein_coding                             | 72139  | -    |
| ENSMUSG00000<br>071324 | 12.99  | 4.186 | 2.066  | 0.005890075 | 0.017770107 | Armc2              | armadillo repeat containing 2                                                           | protein_coding                             | 213402 | -    |
| ENSMUSG00000<br>071350 | 12.3   | 0.171 | -2.546 | 0.000158007 | 0.000942952 | Setdb2             | SET domain, bifurcated 2                                                                | protein_coding                             | 239122 | MBD  |
| ENSMUSG00000<br>071451 | 22.8   | 0.231 | -2.114 | 2.70557E-06 | 3.42832E-05 | Psmg4              | proteasome (prosome, macropain)<br>assembly chaperone 4                                 | protein_coding                             | 69666  | -    |
| ENSMUSG00000<br>071553 | 6.37   | 4.207 | 2.073  | 0.007037731 | 0.020456324 | Cpa2               | carboxypeptidase A2, pancreatic                                                         | protein_coding                             | 232680 | -    |
| ENSMUSG00000<br>071573 | 22.62  | 4.72  | 2.239  | 1.12633E-05 | 0.000110341 | Rnls               | renalase, FAD-dependent amine<br>oxidase                                                | protein_coding                             | 67795  | -    |
| ENSMUSG00000<br>071604 | 10.68  | 6.373 | 2.672  | 0.001443571 | 0.005697237 | Fam189a2           | family with sequence similarity 189,<br>member A2                                       | protein_coding                             | 381217 | -    |
| ENSMUSG00000<br>071644 | 459.33 | 0.208 | -2.266 | 7.80549E-10 | 4.1131E-08  | Eef1g              | eukaryotic translation elongation<br>factor 1 gamma                                     | protein_coding                             | 67160  | -    |
| ENSMUSG00000<br>071654 | 25.95  | 0.16  | -2.643 | 1.64724E-08 | 5.12985E-07 | Uqcc3              | ubiquinol-cytochrome c reductase<br>complex assembly factor 3                           | protein_coding                             | 107197 | -    |
| ENSMUSG00000<br>071661 | 2.58   | 0.125 | -2.995 | 0.013605415 | 0.034525589 | Zbtb3              | zinc finger and BTB domain<br>containing 3                                              | protein_coding                             | 75291  | ZBTB |
| ENSMUSG00000<br>071716 | 39.03  | 0.171 | -2.544 | 4.13068E-08 | 1.08356E-06 | Apol7e             | apolipoprotein L 7e                                                                     | protein_coding                             | 666348 | -    |
| ENSMUSG00000<br>071753 | 6.69   | 5.034 | 2.332  | 0.001707888 | 0.006522645 | C230004F18R<br>ik  | RIKEN cDNA C230004F18 gene                                                              | processed_transc<br>ript                   | 331424 | -    |
| ENSMUSG00000<br>071796 | 88.6   | 0.246 | -2.021 | 1.72377E-08 | 5.33121E-07 | 6820431F20R<br>ik  | cadherin 11 pseudogene                                                                  | transcribed_unpr<br>ocessed_pseudog<br>ene | 547150 | -    |
| ENSMUSG00000<br>071847 | 42.69  | 5.612 | 2.489  | 1.8974E-12  | 2.41804E-10 | Apcdd1             | adenomatosis polyposis coli down-<br>regulated 1                                        | protein_coding                             | 494504 | -    |
| ENSMUSG00000<br>071856 | 37.27  | 4.273 | 2.095  | 4.75519E-06 | 5.4633E-05  | Mcc                | mutated in colorectal cancers                                                           | protein_coding                             | 328949 | -    |
| ENSMUSG00000<br>071984 | 10.02  | 6.166 | 2.624  | 0.000487055 | 0.002344468 | Fndc1              | fibronectin type III domain<br>containing 1                                             | protein_coding                             | 68655  | -    |

|                        |        |       |        |             |             |                   |                                                       |                          |               |         |
|------------------------|--------|-------|--------|-------------|-------------|-------------------|-------------------------------------------------------|--------------------------|---------------|---------|
| ENSMUSG00000<br>072109 | 50.85  | 0.097 | -3.367 | 4.82767E-07 | 8.37339E-06 | A530040E14<br>Rik | -                                                     | antisense_RNA            | -             | -       |
| ENSMUSG00000<br>072214 | 11.14  | 5.215 | 2.383  | 0.001166796 | 0.00478898  | Sept5             | septin 5                                              | protein_coding           | 18951         | -       |
| ENSMUSG00000<br>072494 | 17.23  | 5.988 | 2.582  | 0.017538063 | 0.042386207 | Ppp1r3e           | protein phosphatase 1, regulatory<br>subunit 3E       | protein_coding           | 105651        | -       |
| ENSMUSG00000<br>072573 | 4.53   | 6.307 | 2.657  | 0.017426006 | 0.042189154 | Gm10369           | -                                                     | antisense_RNA            | -             | -       |
| ENSMUSG00000<br>072763 | 6.82   | 0.079 | -3.654 | 4.91457E-05 | 0.000367805 | 5430403G16R<br>ik | -                                                     | protein_coding           | -             | zf-C2H2 |
| ENSMUSG00000<br>072769 | 79.64  | 5.882 | 2.556  | 1.37236E-11 | 1.3258E-09  | Gm10419           | -                                                     | lincRNA                  | -             | -       |
| ENSMUSG00000<br>072875 | 7.95   | 5.359 | 2.422  | 0.00078847  | 0.003469154 | Gpr27             | G protein-coupled receptor 27                         | protein_coding           | 14761         | -       |
| ENSMUSG00000<br>072898 | 5.93   | 0.182 | -2.461 | 0.004483876 | 0.014222553 | Gm10434           | -                                                     | pseudogene               | -             | -       |
| ENSMUSG00000<br>072949 | 18.81  | 5.426 | 2.44   | 1.06289E-07 | 2.356E-06   | Acot1             | acyl-CoA thioesterase 1                               | protein_coding           | 26897         | -       |
| ENSMUSG00000<br>073008 | 25.51  | 0.109 | -3.2   | 2.91591E-10 | 1.71229E-08 | Gpr174            | G protein-coupled receptor 174                        | protein_coding           | 213439        | -       |
| ENSMUSG00000<br>073045 | 7.65   | 4.203 | 2.071  | 0.007768927 | 0.022130603 | Gm5570            | predicted gene 5570                                   | lincRNA                  | 434019        | -       |
| ENSMUSG00000<br>073154 | 12.15  | 4.579 | 2.195  | 0.000446944 | 0.002196099 | 9330158H04R<br>ik | RIKEN cDNA 9330158H04 gene                            | lincRNA                  | 319472        | -       |
| ENSMUSG00000<br>073414 | 139.2  | 5.734 | 2.52   | 4.20618E-09 | 1.71385E-07 | G6b               | megakaryocyte and platelet<br>inhibitory receptor G6b | protein_coding           | 106722        | -       |
| ENSMUSG00000<br>073421 | 655.19 | 0.016 | -5.95  | 2.59011E-29 | 5.1713E-26  | H2-Ab1            | histocompatibility 2, class II antigen<br>A, beta 1   | protein_coding           | 14961         | -       |
| ENSMUSG00000<br>073422 | 46.67  | 0.205 | -2.288 | 1.3038E-06  | 1.88025E-05 | H2-Ke6            | H2-K region expressed gene 6                          | protein_coding           | 14979         | -       |
| ENSMUSG00000<br>073430 | 2.01   | 0.032 | -4.979 | 0.001833171 | 0.00691006  | Gm10505           | -                                                     | lincRNA                  | -             | -       |
| ENSMUSG00000<br>073481 | 54.87  | 0.202 | -2.305 | 7.73813E-10 | 4.09166E-08 | Marc2             | mitochondrial amidoxime reducing<br>component 2       | protein_coding           | 67247         | -       |
| ENSMUSG00000<br>073514 | 39.26  | 4.759 | 2.251  | 2.75574E-10 | 1.6506E-08  | Dok6              | docking protein 6                                     | protein_coding           | 623279        | -       |
| ENSMUSG00000<br>073538 | 12.36  | 0.104 | -3.259 | 1.92096E-06 | 2.59337E-05 | E330020D12<br>Rik | -                                                     | processed_transc<br>ript | -             | -       |
| ENSMUSG00000<br>073551 | 10.53  | 4.925 | 2.3    | 0.000823287 | 0.003600579 | Spink13           | serine peptidase inhibitor, Kazal type<br>13          | protein_coding           | 100038<br>417 | -       |
| ENSMUSG00000<br>073628 | 16.85  | 0.124 | -3.014 | 4.16453E-06 | 4.91671E-05 | Gm10552           | -                                                     | antisense_RNA            | -             | -       |
| ENSMUSG00000<br>073631 | 9.81   | 0.208 | -2.266 | 0.012955638 | 0.033242876 | Gm10553           | -                                                     | protein_coding           | -             | -       |
| ENSMUSG00000<br>073647 | 7.55   | 0.072 | -3.793 | 1.15829E-05 | 0.00011281  | Gm10557           | -                                                     | pseudogene               | -             | -       |
| ENSMUSG00000<br>073676 | 49.64  | 0.083 | -3.593 | 1.98471E-13 | 3.53101E-11 | Hspe1             | heat shock protein 1 (chaperonin 10)                  | protein_coding           | 15528         | -       |

|                    |         |        |        |             |             |            |                                                                  |                                    |               |     |
|--------------------|---------|--------|--------|-------------|-------------|------------|------------------------------------------------------------------|------------------------------------|---------------|-----|
| ENSMUSG00000073894 | 8.46    | 7.799  | 2.963  | 0.00021348  | 0.001203268 | Rbmx12     | RNA binding motif protein, X-linked-like 2                       | protein_coding                     | 76572         | -   |
| ENSMUSG00000073991 | 20.47   | 4.893  | 2.291  | 2.30585E-07 | 4.5184E-06  | Cnbd1      | -                                                                | protein_coding                     | -             | -   |
| ENSMUSG00000074067 | 5.38    | 10.709 | 3.421  | 0.003045203 | 0.010402901 | Gm10619    | predicted gene 10619                                             | lincRNA                            | 100579<br>147 | -   |
| ENSMUSG00000074071 | 78.42   | 0.198  | -2.336 | 1.16558E-10 | 8.11792E-09 | Fam169b    | family with sequence similarity 169, member B                    | protein_coding                     | 434197        | -   |
| ENSMUSG00000074129 | 2941.07 | 0.203  | -2.301 | 3.43922E-07 | 6.30606E-06 | Rpl13a     | ribosomal protein L13A                                           | protein_coding                     | 22121         | -   |
| ENSMUSG00000074164 | 31.74   | 4.634  | 2.212  | 5.95693E-08 | 1.45831E-06 | Vmn2r-ps54 | vomeronasal 2, receptor, pseudogene 54                           | transcribed_unprocessed_pseudogene | 75835         | -   |
| ENSMUSG00000074235 | 21.12   | 5.474  | 2.453  | 4.27697E-06 | 5.01651E-05 | Gm10649    | predicted gene 10649                                             | bidirectional_promoter_lincRNA     | 102640<br>923 | -   |
| ENSMUSG00000074284 | 6.31    | 0.182  | -2.455 | 0.007108305 | 0.020624758 | Gm10658    | -                                                                | antisense_RNA                      | -             | -   |
| ENSMUSG00000074340 | 17.74   | 4.854  | 2.279  | 0.00101217  | 0.004260409 | Ovgp1      | oviductal glycoprotein 1                                         | protein_coding                     | 12659         | -   |
| ENSMUSG00000074343 | 4.27    | 5.108  | 2.353  | 0.008945361 | 0.024786305 | Gldnos     | gliomedin, opposite strand                                       | antisense_RNA                      | 73567         | -   |
| ENSMUSG00000074452 | 7.13    | 4.465  | 2.159  | 0.015027982 | 0.037370303 | Pate2      | prostate and testis expressed 2                                  | protein_coding                     | 330921        | -   |
| ENSMUSG00000074491 | 8.74    | 5.211  | 2.382  | 9.07544E-05 | 0.000602426 | Clec4g     | C-type lectin domain family 4, member g                          | protein_coding                     | 75863         | -   |
| ENSMUSG00000074555 | 9.08    | 5.919  | 2.565  | 0.000114482 | 0.000725365 | Gm10714    | predicted gene 10714                                             | antisense_RNA                      | 100038<br>374 | -   |
| ENSMUSG00000074570 | 65.36   | 4.061  | 2.022  | 7.02019E-08 | 1.66859E-06 | Cass4      | Cas scaffolding protein family member 4                          | protein_coding                     | 320664        | -   |
| ENSMUSG00000074607 | 16.43   | 4.95   | 2.308  | 0.001217299 | 0.004955517 | Tox2       | TOX high mobility group box family member 2                      | protein_coding                     | 269389        | HMG |
| ENSMUSG00000074625 | 6.42    | 4.113  | 2.04   | 0.00388125  | 0.01266658  | Arhgap40   | Rho GTPase activating protein 40                                 | protein_coding                     | 545481        | -   |
| ENSMUSG00000074652 | 9.04    | 6.143  | 2.619  | 0.000146902 | 0.000892994 | Myh7b      | myosin, heavy chain 7B, cardiac muscle, beta                     | protein_coding                     | 668940        | -   |
| ENSMUSG00000074657 | 12.39   | 7.178  | 2.843  | 6.48411E-06 | 7.00356E-05 | Kif5a      | kinesin family member 5A                                         | protein_coding                     | 16572         | -   |
| ENSMUSG00000074764 | 13.09   | 6.347  | 2.666  | 8.64919E-07 | 1.34212E-05 | Sel1l2     | sel-1 suppressor of lin-12-like 2 (C. elegans)                   | protein_coding                     | 228684        | -   |
| ENSMUSG00000074771 | 6.63    | 4.709  | 2.235  | 0.007919741 | 0.022481804 | Ankfl1     | ankyrin repeat and EF-hand domain containing 1                   | protein_coding                     | 319196        | -   |
| ENSMUSG00000074776 | 22.39   | 4.069  | 2.025  | 1.26355E-06 | 1.83251E-05 | Gm10754    | predicted gene 10754                                             | lincRNA                            | 100038<br>699 | -   |
| ENSMUSG00000074783 | 8.43    | 19.734 | 4.303  | 5.73765E-07 | 9.6265E-06  | AU019990   | expressed sequence AU019990                                      | lincRNA                            | 767814        | -   |
| ENSMUSG00000074797 | 12.7    | 0.247  | -2.019 | 0.002223318 | 0.00809704  | Itpa       | inosine triphosphatase (nucleoside triphosphate pyrophosphatase) | protein_coding                     | 16434         | -   |
| ENSMUSG00000074818 | 5.77    | 7.905  | 2.983  | 0.002117311 | 0.007774001 | Pdz7       | PDZ domain containing 7                                          | protein_coding                     | 100503<br>041 | -   |

|                    |         |        |        |             |             |               |                                                       |                        |           |   |
|--------------------|---------|--------|--------|-------------|-------------|---------------|-------------------------------------------------------|------------------------|-----------|---|
| ENSMUSG00000074874 | 3195.21 | 4.097  | 2.035  | 3.34993E-05 | 0.000270053 | Ctla2b        | cytotoxic T lymphocyte-associated protein 2 beta      | protein_coding         | 13025     | - |
| ENSMUSG00000074918 | 184.92  | 4.592  | 2.199  | 3.47708E-08 | 9.36726E-07 | Inafm2        | InaF motif containing 2                               | protein_coding         | 100043272 | - |
| ENSMUSG00000075015 | 13.72   | 4.061  | 2.022  | 0.005931037 | 0.01787868  | Gm10801       | -                                                     | protein_coding         | -         | - |
| ENSMUSG00000075033 | 79.44   | 0.234  | -2.098 | 9.26795E-11 | 6.76975E-09 | Nxpe3         | neurexophilin and PC-esterase domain family, member 3 | protein_coding         | 385658    | - |
| ENSMUSG00000075054 | 14.36   | 0.211  | -2.243 | 6.00701E-05 | 0.000430965 | Yae1d1        | Yae1 domain containing 1                              | protein_coding         | 67008     | - |
| ENSMUSG00000075070 | 9.89    | 7.009  | 2.809  | 0.00024833  | 0.001358911 | 4932412D23Rik | RIKEN cDNA 4932412D23 gene                            | processed_transcript   | 75722     | - |
| ENSMUSG00000075229 | 11.65   | 0.184  | -2.441 | 0.000219147 | 0.001231537 | Ccdc58        | coiled-coil domain containing 58                      | protein_coding         | 381045    | - |
| ENSMUSG00000075268 | 11.38   | 0.192  | -2.378 | 0.000312401 | 0.001637554 | Gm10819       | -                                                     | processed_pseudogene   | -         | - |
| ENSMUSG00000075279 | 8.88    | 0.126  | -2.987 | 0.00038521  | 0.001938348 | Mrpl23-ps1    | -                                                     | processed_pseudogene   | -         | - |
| ENSMUSG00000075286 | 28.74   | 4.792  | 2.261  | 4.6657E-07  | 8.13961E-06 | Gm1968        | predicted gene 1968                                   | protein_coding         | 328657    | - |
| ENSMUSG00000075330 | 9.15    | 5.395  | 2.432  | 0.001270907 | 0.005135355 | A930003A15Rik | RIKEN cDNA A930003A15 gene                            | protein_coding         | 68162     | - |
| ENSMUSG00000075335 | 3.86    | 11.387 | 3.509  | 7.3363E-05  | 0.000507424 | 4930588K23Rik | -                                                     | antisense_RNA          | -         | - |
| ENSMUSG00000075359 | 8.52    | 0.184  | -2.441 | 0.001059544 | 0.004427661 | Gm20775       | -                                                     | unprocessed_pseudogene | -         | - |
| ENSMUSG00000075389 | 5.8     | 6.474  | 2.695  | 0.005093113 | 0.015800786 | 2810410L24Rik | -                                                     | processed_transcript   | -         | - |
| ENSMUSG00000075520 | 102.67  | 4.648  | 2.217  | 1.31944E-10 | 8.92835E-09 | Malrd1        | MAM and LDL receptor class A domain containing 1      | protein_coding         | 102635496 | - |
| ENSMUSG00000075585 | 19.78   | 4.038  | 2.014  | 3.74891E-05 | 0.000295198 | 6330403L08Rik | -                                                     | antisense_RNA          | -         | - |
| ENSMUSG00000075602 | 182.75  | 0.155  | -2.687 | 1.10337E-10 | 7.7751E-09  | Ly6a          | lymphocyte antigen 6 complex, locus A                 | protein_coding         | 110454    | - |
| ENSMUSG00000076137 | 30.05   | 0.226  | -2.147 | 7.92838E-06 | 8.27323E-05 | Gm26384       | -                                                     | miRNA                  | -         | - |
| ENSMUSG00000076434 | 8.77    | 5.582  | 2.481  | 0.000145552 | 0.000886727 | Wfdc3         | WAP four-disulfide core domain 3                      | protein_coding         | 71856     | - |
| ENSMUSG00000076436 | 5.44    | 14.411 | 3.849  | 9.97688E-05 | 0.000652857 | Oxct2a        | 3-oxoacid CoA transferase 2A                          | protein_coding         | 64059     | - |
| ENSMUSG00000076437 | 20.56   | 0.155  | -2.689 | 1.37513E-05 | 0.000130113 | Selenoh       | selenoprotein H                                       | protein_coding         | 72657     | - |
| ENSMUSG00000076454 | 11.95   | 0.134  | -2.9   | 2.79761E-05 | 0.000233598 | Mir762        | microRNA 762                                          | miRNA                  | 791073    | - |
| ENSMUSG00000076462 | 14.12   | 0.225  | -2.154 | 0.002896601 | 0.009978724 | Trbv2         | -                                                     | TR_V_gene              | -         | - |
| ENSMUSG00000076465 | 7.34    | 0.073  | -3.776 | 1.47901E-05 | 0.000138418 | Trbv5         | -                                                     | TR_V_gene              | -         | - |

|                        |        |       |        |             |             |            |   |           |   |   |
|------------------------|--------|-------|--------|-------------|-------------|------------|---|-----------|---|---|
| ENSMUSG00000<br>076467 | 19.51  | 0.078 | -3.687 | 4.33633E-08 | 1.11632E-06 | Trbv13-1   | - | TR_V_gene | - | - |
| ENSMUSG00000<br>076469 | 22.5   | 0.217 | -2.201 | 1.15543E-05 | 0.000112653 | Trbv13-2   | - | TR_V_gene | - | - |
| ENSMUSG00000<br>076471 | 5.54   | 0.011 | -6.502 | 7.94334E-07 | 1.24876E-05 | Trbv14     | - | TR_V_gene | - | - |
| ENSMUSG00000<br>076473 | 13.37  | 0.116 | -3.109 | 4.29225E-06 | 5.03115E-05 | Trbv16     | - | TR_V_gene | - | - |
| ENSMUSG00000<br>076483 | 9.33   | 0.145 | -2.787 | 0.000166958 | 0.000986216 | Trbj1-1    | - | TR_J_gene | - | - |
| ENSMUSG00000<br>076485 | 6.2    | 0.049 | -4.356 | 2.83324E-05 | 0.00023575  | Trbj1-3    | - | TR_J_gene | - | - |
| ENSMUSG00000<br>076490 | 260.58 | 0.173 | -2.532 | 2.69717E-12 | 3.29697E-10 | Trbc1      | - | TR_C_gene | - | - |
| ENSMUSG00000<br>076492 | 11.03  | 0.071 | -3.824 | 5.59706E-07 | 9.40819E-06 | Trbj2-1    | - | TR_J_gene | - | - |
| ENSMUSG00000<br>076496 | 7.57   | 0.183 | -2.452 | 0.002510049 | 0.00889958  | Trbj2-5    | - | TR_J_gene | - | - |
| ENSMUSG00000<br>076497 | 10.92  | 0.2   | -2.322 | 0.001583099 | 0.00613737  | Trbj2-7    | - | TR_J_gene | - | - |
| ENSMUSG00000<br>076498 | 347.33 | 0.186 | -2.427 | 1.71409E-11 | 1.62965E-09 | Trbc2      | - | TR_C_gene | - | - |
| ENSMUSG00000<br>076501 | 8.43   | 0.135 | -2.889 | 0.001019899 | 0.004288923 | Igkv2-137  | - | IG_V_gene | - | - |
| ENSMUSG00000<br>076508 | 10.55  | 0.098 | -3.352 | 2.94243E-06 | 3.68976E-05 | Igkv17-127 | - | IG_V_gene | - | - |
| ENSMUSG00000<br>076514 | 10.36  | 0.05  | -4.31  | 2.91998E-08 | 8.10959E-07 | Igkv17-121 | - | IG_V_gene | - | - |
| ENSMUSG00000<br>076522 | 5.46   | 0.011 | -6.507 | 6.41423E-07 | 1.0545E-05  | Igkv16-104 | - | IG_V_gene | - | - |
| ENSMUSG00000<br>076523 | 5.2    | 0.012 | -6.37  | 1.76163E-05 | 0.000160196 | Igkv15-103 | - | IG_V_gene | - | - |
| ENSMUSG00000<br>076538 | 7.92   | 0.008 | -6.987 | 1.92986E-08 | 5.85048E-07 | Igkv13-84  | - | IG_V_gene | - | - |
| ENSMUSG00000<br>076540 | 4.5    | 0.014 | -6.139 | 4.31998E-06 | 5.05376E-05 | Igkv4-80   | - | IG_V_gene | - | - |
| ENSMUSG00000<br>076541 | 3.32   | 0.019 | -5.706 | 8.73396E-05 | 0.000584636 | Igkv4-79   | - | IG_V_gene | - | - |
| ENSMUSG00000<br>076543 | 4.09   | 0.016 | -6.003 | 7.75799E-05 | 0.00053106  | Igkv4-74   | - | IG_V_gene | - | - |
| ENSMUSG00000<br>076545 | 11.94  | 0.088 | -3.503 | 1.60668E-06 | 2.23802E-05 | Igkv4-72   | - | IG_V_gene | - | - |
| ENSMUSG00000<br>076547 | 5.91   | 0.097 | -3.366 | 0.000270203 | 0.001451503 | Igkv4-70   | - | IG_V_gene | - | - |
| ENSMUSG00000<br>076549 | 11.54  | 0.202 | -2.306 | 0.004389956 | 0.014000616 | Igkv4-68   | - | IG_V_gene | - | - |
| ENSMUSG00000<br>076550 | 7.26   | 0.009 | -6.835 | 2.40631E-07 | 4.67353E-06 | Igkv4-63   | - | IG_V_gene | - | - |



|                        |        |       |        |             |             |            |   |           |   |   |
|------------------------|--------|-------|--------|-------------|-------------|------------|---|-----------|---|---|
| ENSMUSG00000<br>076555 | 6.61   | 0.009 | -6.754 | 2.32102E-07 | 4.54318E-06 | Igkv4-57-1 | - | IG_V_gene | - | - |
| ENSMUSG00000<br>076556 | 5.69   | 0.146 | -2.776 | 0.000783101 | 0.003447215 | Igkv4-57   | - | IG_V_gene | - | - |
| ENSMUSG00000<br>076563 | 8.38   | 0.135 | -2.886 | 0.011001063 | 0.029294325 | Igkv5-48   | - | IG_V_gene | - | - |
| ENSMUSG00000<br>076564 | 7.06   | 0.009 | -6.838 | 5.45875E-08 | 1.35856E-06 | Igkv12-46  | - | IG_V_gene | - | - |
| ENSMUSG00000<br>076576 | 11.91  | 0.005 | -7.594 | 5.92043E-11 | 4.6254E-09  | Igkv6-32   | - | IG_V_gene | - | - |
| ENSMUSG00000<br>076577 | 11.23  | 0.071 | -3.821 | 5.29005E-07 | 9.00842E-06 | Igkv8-30   | - | IG_V_gene | - | - |
| ENSMUSG00000<br>076580 | 4.8    | 0.238 | -2.073 | 0.010363912 | 0.027928784 | Igkv8-27   | - | IG_V_gene | - | - |
| ENSMUSG00000<br>076594 | 9.31   | 0.176 | -2.506 | 0.001119944 | 0.004632659 | Igkv6-13   | - | IG_V_gene | - | - |
| ENSMUSG00000<br>076598 | 8.12   | 0.036 | -4.791 | 7.78554E-07 | 1.22934E-05 | Igkv3-7    | - | IG_V_gene | - | - |
| ENSMUSG00000<br>076604 | 44.48  | 0.056 | -4.163 | 3.23114E-16 | 1.05564E-13 | Igkj1      | - | IG_J_gene | - | - |
| ENSMUSG00000<br>076605 | 39.22  | 0.043 | -4.526 | 4.13409E-18 | 1.81184E-15 | Igkj2      | - | IG_J_gene | - | - |
| ENSMUSG00000<br>076607 | 21.68  | 0.035 | -4.837 | 1.29535E-14 | 3.2328E-12  | Igkj4      | - | IG_J_gene | - | - |
| ENSMUSG00000<br>076608 | 33.49  | 0.045 | -4.488 | 5.17545E-16 | 1.63154E-13 | Igkj5      | - | IG_J_gene | - | - |
| ENSMUSG00000<br>076609 | 957.95 | 0.082 | -3.603 | 3.84809E-06 | 4.611E-05   | Igkc       | - | IG_C_gene | - | - |
| ENSMUSG00000<br>076612 | 9.59   | 0.029 | -5.096 | 8.07725E-08 | 1.86555E-06 | Ighg2c     | - | IG_C_gene | - | - |
| ENSMUSG00000<br>076613 | 15.56  | 0.225 | -2.15  | 0.001203144 | 0.004906074 | Ighg2b     | - | IG_C_gene | - | - |
| ENSMUSG00000<br>076615 | 14.1   | 0.074 | -3.749 | 3.11125E-06 | 3.85294E-05 | Ighg3      | - | IG_C_gene | - | - |
| ENSMUSG00000<br>076617 | 821.6  | 0.084 | -3.574 | 9.5519E-18  | 3.99159E-15 | Ighm       | - | IG_C_gene | - | - |
| ENSMUSG00000<br>076618 | 16.45  | 0.047 | -4.406 | 2.0743E-09  | 9.65622E-08 | Ighj4      | - | IG_J_gene | - | - |
| ENSMUSG00000<br>076619 | 12.9   | 0.042 | -4.563 | 3.4705E-08  | 9.36359E-07 | Ighj3      | - | IG_J_gene | - | - |
| ENSMUSG00000<br>076620 | 16.56  | 0.046 | -4.44  | 4.13652E-09 | 1.6893E-07  | Ighj2      | - | IG_J_gene | - | - |
| ENSMUSG00000<br>076621 | 14.65  | 0.168 | -2.571 | 2.01511E-05 | 0.000179166 | Ighj1      | - | IG_J_gene | - | - |
| ENSMUSG00000<br>076666 | 3.38   | 0.018 | -5.811 | 2.70976E-05 | 0.000227674 | Ighv14-4   | - | IG_V_gene | - | - |
| ENSMUSG00000<br>076672 | 4.94   | 0.012 | -6.332 | 2.81471E-05 | 0.00023459  | Ighv3-6    | - | IG_V_gene | - | - |

|                    |        |        |        |             |             |               |                                                  |  |                      |        |         |
|--------------------|--------|--------|--------|-------------|-------------|---------------|--------------------------------------------------|--|----------------------|--------|---------|
| ENSMUSG00000076870 | 16.1   | 10.762 | 3.428  | 1.39049E-06 | 1.98931E-05 | Trdj1         | -                                                |  | TR_J_gene            | -      | -       |
| ENSMUSG00000076928 | 87.73  | 0.144  | -2.793 | 4.54354E-14 | 9.71939E-12 | Trac          | -                                                |  | TR_C_gene            | -      | -       |
| ENSMUSG00000076934 | 10.78  | 0.006  | -7.405 | 6.17299E-09 | 2.34508E-07 | Iglv1         | -                                                |  | IG_V_gene            | -      | -       |
| ENSMUSG00000076937 | 128.86 | 0.019  | -5.751 | 3.13479E-30 | 8.04702E-27 | Iglc2         | -                                                |  | IG_C_gene            | -      | -       |
| ENSMUSG00000076939 | 17.58  | 0.03   | -5.077 | 1.73011E-12 | 2.26178E-10 | Iglv3         | -                                                |  | IG_V_gene            | -      | -       |
| ENSMUSG00000076940 | 8.34   | 0.067  | -3.894 | 2.86993E-05 | 0.000238173 | Iglv2         | -                                                |  | IG_V_gene            | -      | -       |
| ENSMUSG00000078180 | 11.54  | 0.21   | -2.248 | 0.000829389 | 0.00362082  | Gm20900       | -                                                |  | processed_pseudogene | -      | -       |
| ENSMUSG00000078302 | 8.92   | 9.912  | 3.309  | 0.001945121 | 0.007248421 | Foxd1         | forkhead box D1                                  |  | protein_coding       | 15229  | Fork    |
| ENSMUSG00000078308 | 4.16   | 4.381  | 2.131  | 0.011107783 | 0.029517267 | Gm7293        | -                                                |  | lincRNA              | -      | -       |
| ENSMUSG00000078377 | 227.1  | 0.207  | -2.272 | 3.33691E-12 | 3.91901E-10 | Gm4294        | -                                                |  | processed_pseudogene | -      | -       |
| ENSMUSG00000078453 | 36.06  | 0.194  | -2.363 | 2.73643E-09 | 1.2171E-07  | Abrac1        | ABRA C-terminal like                             |  | protein_coding       | 73112  | -       |
| ENSMUSG00000078519 | 5.64   | 6.152  | 2.621  | 0.000944336 | 0.004021897 | 2310026L22Rik | -                                                |  | lincRNA              | -      | -       |
| ENSMUSG00000078784 | 8.73   | 0.241  | -2.052 | 0.012809011 | 0.032960779 | 1810022K09Rik | RIKEN cDNA 1810022K09 gene                       |  | protein_coding       | 69126  | -       |
| ENSMUSG00000078789 | 14.96  | 0.238  | -2.072 | 0.000186192 | 0.001076962 | Dph1          | diphthamide biosynthesis 1                       |  | protein_coding       | 116905 | -       |
| ENSMUSG00000078810 | 143.99 | 5.549  | 2.472  | 5.67918E-11 | 4.47584E-09 | Gp6           | glycoprotein 6 (platelet)                        |  | protein_coding       | 243816 | -       |
| ENSMUSG00000078861 | 5.59   | 0.199  | -2.331 | 0.002808424 | 0.009736556 | Zfp931        | zinc finger protein 931                          |  | protein_coding       | 353208 | zf-C2H2 |
| ENSMUSG00000078862 | 18.98  | 0.197  | -2.34  | 1.37579E-05 | 0.000130113 | Gm14326       | predicted gene 14326                             |  | protein_coding       | 665211 | zf-C2H2 |
| ENSMUSG00000078870 | 32.25  | 0.232  | -2.108 | 0.000399615 | 0.001998518 | Gm14410       | -                                                |  | protein_coding       | -      | zf-C2H2 |
| ENSMUSG00000078926 | 8      | 4.423  | 2.145  | 0.003962673 | 0.01287618  | Cdc20b        | cell division cycle 20B                          |  | protein_coding       | 238896 | -       |
| ENSMUSG00000078995 | 8.1    | 0.171  | -2.551 | 0.002154107 | 0.007884937 | Zfp456        | zinc finger protein 456                          |  | protein_coding       | 408065 | zf-C2H2 |
| ENSMUSG00000079018 | 75.07  | 0.22   | -2.183 | 1.30846E-08 | 4.26709E-07 | Ly6c1         | lymphocyte antigen 6 complex, locus C1           |  | protein_coding       | 17067  | -       |
| ENSMUSG00000079101 | 41.36  | 5.61   | 2.488  | 5.97045E-07 | 9.88784E-06 | Gm2904        | -                                                |  | processed_pseudogene | -      | -       |
| ENSMUSG00000079104 | 17.08  | 0.245  | -2.029 | 0.000244016 | 0.001341303 | Prps113       | phosphoribosyl pyrophosphate synthetase 1-like 3 |  | protein_coding       | 328099 | -       |
| ENSMUSG00000079137 | 9.35   | 0.117  | -3.093 | 7.71763E-05 | 0.0005287   | Rpl27-ps1     | -                                                |  | processed_pseudogene | -      | -       |

|                    |        |        |        |             |             |               |                                                     |                                    |           |          |
|--------------------|--------|--------|--------|-------------|-------------|---------------|-----------------------------------------------------|------------------------------------|-----------|----------|
| ENSMUSG00000079139 | 27.94  | 0.227  | -2.139 | 9.22937E-08 | 2.0887E-06  | Gm4204        | -                                                   | processed_pseudogene               | -         | -        |
| ENSMUSG00000079156 | 4.49   | 12.504 | 3.644  | 0.002347636 | 0.008458928 | Smok3b        | sperm motility kinase 3B                            | protein_coding                     | 622474    | -        |
| ENSMUSG00000079157 | 48.95  | 4.231  | 2.081  | 1.27754E-07 | 2.72425E-06 | Fam155a       | family with sequence similarity 155, member A       | protein_coding                     | 270028    | -        |
| ENSMUSG00000079224 | 3.74   | 0.163  | -2.615 | 0.010353958 | 0.027906146 | Gm6565        | -                                                   | processed_pseudogene               | -         | -        |
| ENSMUSG00000079225 | 9.9    | 0.223  | -2.163 | 0.000897651 | 0.003863446 | Gm9531        | -                                                   | transcribed_processed_pseudogene   | -         | -        |
| ENSMUSG00000079235 | 6.95   | 5.001  | 2.322  | 0.004814318 | 0.015063291 | Ccdc13        | coiled-coil domain containing 13                    | protein_coding                     | 100502861 | -        |
| ENSMUSG00000079278 | 8.64   | 6.402  | 2.679  | 0.000486534 | 0.002343843 | Tmem233       | transmembrane protein 233                           | protein_coding                     | 545798    | -        |
| ENSMUSG00000079324 | 9.76   | 4.931  | 2.302  | 0.00147376  | 0.005792212 | 4932414N04Rik | RIKEN cDNA 4932414N04 gene                          | protein_coding                     | 75721     | -        |
| ENSMUSG00000079363 | 62.31  | 0.24   | -2.059 | 9.98554E-06 | 9.93523E-05 | Gbp4          | guanylate binding protein 4                         | protein_coding                     | 17472     | -        |
| ENSMUSG00000079364 | 49.99  | 5.432  | 2.442  | 9.32725E-08 | 2.10554E-06 | Gm3558        | predicted gene 3558                                 | protein_coding                     | 100041874 | -        |
| ENSMUSG00000079410 | 42.02  | 5.717  | 2.515  | 3.51196E-07 | 6.42426E-06 | Gm2897        | predicted gene 2897                                 | protein_coding                     | 100040671 | -        |
| ENSMUSG00000079419 | 209.92 | 0.172  | -2.538 | 1.70761E-12 | 2.25618E-10 | Ms4a6c        | membrane-spanning 4-domains, subfamily A, member 6C | protein_coding                     | 73656     | -        |
| ENSMUSG00000079455 | 20.85  | 0.214  | -2.223 | 0.000465722 | 0.002265444 | Gm16026       | -                                                   | transcribed_unprocessed_pseudogene | -         | -        |
| ENSMUSG00000079523 | 700.39 | 0.218  | -2.2   | 7.94637E-09 | 2.85007E-07 | Tmsb10        | thymosin, beta 10                                   | protein_coding                     | 19240     | -        |
| ENSMUSG00000079543 | 8.06   | 0.067  | -3.894 | 8.38613E-06 | 8.68533E-05 | Igkv13-85     | -                                                   | IG_V_gene                          | -         | -        |
| ENSMUSG00000079547 | 115.11 | 0.037  | -4.771 | 8.67462E-22 | 5.99517E-19 | H2-DMb1       | histocompatibility 2, class II, locus Mb1           | protein_coding                     | 14999     | -        |
| ENSMUSG00000079560 | 54.11  | 4.538  | 2.182  | 2.59173E-07 | 4.96491E-06 | Hoxa3         | homeobox A3                                         | protein_coding                     | 15400     | Homeobox |
| ENSMUSG00000079564 | 7.2    | 4.182  | 2.064  | 0.002494847 | 0.008859666 | Gm11149       | predicted gene 11149                                | antisense_RNA                      | 100036537 | -        |
| ENSMUSG00000079575 | 4.3    | 0.132  | -2.923 | 0.003434579 | 0.011450085 | Rbpsuh-rs3    | -                                                   | processed_pseudogene               | -         | -        |
| ENSMUSG00000079584 | 7.55   | 7.648  | 2.935  | 0.000242608 | 0.001334382 | Gm364         | predicted gene 364                                  | protein_coding                     | 245423    | -        |
| ENSMUSG00000079593 | 170.78 | 6.436  | 2.686  | 1.12698E-11 | 1.13133E-09 | Gm14597       | RIKEN cDNA 4933416108 gene                          | protein_coding                     | 71159     | -        |
| ENSMUSG00000079677 | 19.23  | 0.206  | -2.283 | 0.000738448 | 0.0032881   | Fdx1l         | ferredoxin 1-like                                   | protein_coding                     | 68165     | -        |
| ENSMUSG00000079700 | 66.18  | 5.521  | 2.465  | 7.03913E-08 | 1.67089E-06 | Fpr3          | formyl peptide receptor 3                           | protein_coding                     | 14294     | -        |

|                    |        |       |        |             |             |            |                                  |                      |           |   |
|--------------------|--------|-------|--------|-------------|-------------|------------|----------------------------------|----------------------|-----------|---|
| ENSMUSG00000079845 | 7.3    | 0.107 | -3.231 | 0.000202683 | 0.001153996 | Xlr4a      | X-linked lymphocyte-regulated 4A | protein_coding       | 434794    | - |
| ENSMUSG00000080002 | 3.77   | 0.154 | -2.701 | 0.00367283  | 0.012101384 | Gm5566     | -                                | processed_pseudogene | -         | - |
| ENSMUSG00000080746 | 46.09  | 0.134 | -2.902 | 1.1825E-13  | 2.26046E-11 | Rpsa-ps12  | -                                | processed_pseudogene | -         | - |
| ENSMUSG00000080816 | 4.28   | 0.015 | -6.086 | 5.07444E-06 | 5.7618E-05  | Gm12447    | -                                | processed_pseudogene | -         | - |
| ENSMUSG00000080875 | 5.13   | 0.112 | -3.154 | 0.00046903  | 0.002277836 | Gm7332     | -                                | processed_pseudogene | -         | - |
| ENSMUSG00000080877 | 8.79   | 0.007 | -7.155 | 6.83123E-08 | 1.63449E-06 | Rpl22-ps1  | -                                | processed_pseudogene | -         | - |
| ENSMUSG00000080893 | 6.18   | 0.24  | -2.06  | 0.013880265 | 0.035039968 | Gm15920    | -                                | processed_pseudogene | -         | - |
| ENSMUSG00000080969 | 5.87   | 0.051 | -4.283 | 5.47296E-05 | 0.000401403 | Gm12372    | -                                | processed_pseudogene | -         | - |
| ENSMUSG00000080977 | 3.67   | 0.018 | -5.836 | 5.5589E-05  | 0.000405554 | Gm13772    | -                                | processed_pseudogene | -         | - |
| ENSMUSG00000081023 | 7.81   | 0.106 | -3.238 | 0.000192979 | 0.001109292 | Gm15766    | -                                | processed_pseudogene | -         | - |
| ENSMUSG00000081076 | 5.86   | 0.197 | -2.343 | 0.00408256  | 0.013198905 | Rpsa-ps4   | -                                | processed_pseudogene | -         | - |
| ENSMUSG00000081189 | 53.74  | 6.885 | 2.783  | 6.70581E-07 | 1.0885E-05  | Hspd1-ps4  | -                                | processed_pseudogene | -         | - |
| ENSMUSG00000081219 | 11.36  | 0.136 | -2.875 | 1.96309E-05 | 0.000175389 | Bambi-ps1  | -                                | processed_pseudogene | -         | - |
| ENSMUSG00000081308 | 4.5    | 7.808 | 2.965  | 0.000481281 | 0.00232602  | Gm14480    | -                                | processed_pseudogene | -         | - |
| ENSMUSG00000081325 | 7.45   | 0.195 | -2.355 | 0.00436945  | 0.013953198 | Gm12599    | -                                | processed_pseudogene | -         | - |
| ENSMUSG00000081406 | 405.07 | 0.221 | -2.177 | 1.86845E-10 | 1.19481E-08 | Rps6-ps4   | 40S ribosomal protein S6         | processed_pseudogene | 105244208 | - |
| ENSMUSG00000081520 | 5.3    | 0.099 | -3.336 | 0.00037137  | 0.001878175 | Gm16200    | -                                | processed_pseudogene | -         | - |
| ENSMUSG00000081603 | 7.74   | 0.067 | -3.906 | 5.22744E-06 | 5.90767E-05 | Gm14681    | -                                | processed_pseudogene | -         | - |
| ENSMUSG00000081695 | 27.16  | 0.196 | -2.35  | 4.37011E-06 | 5.09912E-05 | Rpsa-ps5   | -                                | processed_pseudogene | -         | - |
| ENSMUSG00000081926 | 36.76  | 0.174 | -2.526 | 1.18449E-09 | 5.94528E-08 | Gm15536    | -                                | processed_pseudogene | -         | - |
| ENSMUSG00000081992 | 151.2  | 0.247 | -2.018 | 6.91339E-09 | 2.55611E-07 | Gm13408    | -                                | processed_pseudogene | -         | - |
| ENSMUSG00000082028 | 2.81   | 0.023 | -5.452 | 0.000390589 | 0.001959381 | Gm1826     | -                                | processed_pseudogene | -         | - |
| ENSMUSG00000082064 | 50.42  | 0.156 | -2.683 | 3.20862E-08 | 8.7756E-07  | Rpl5-ps2   | -                                | processed_pseudogene | -         | - |
| ENSMUSG00000082109 | 15.88  | 0.218 | -2.2   | 0.000158002 | 0.000942952 | Rpl19-ps12 | -                                | processed_pseudogene | -         | - |

|                        |        |       |        |             |             |           |   |                          |   |   |
|------------------------|--------|-------|--------|-------------|-------------|-----------|---|--------------------------|---|---|
| ENSMUSG00000<br>082128 | 28.53  | 0.164 | -2.608 | 9.45325E-07 | 1.44443E-05 | Gm11824   | - | processed_pseud<br>ogene | - | - |
| ENSMUSG00000<br>082185 | 116.45 | 4.051 | 2.018  | 2.98732E-06 | 3.73031E-05 | Gm12428   | - | processed_pseud<br>ogene | - | - |
| ENSMUSG00000<br>082193 | 239.26 | 0.182 | -2.454 | 4.48605E-12 | 5.0698E-10  | Rpl5-ps1  | - | processed_pseud<br>ogene | - | - |
| ENSMUSG00000<br>082195 | 5.55   | 0.155 | -2.686 | 0.002830522 | 0.009791773 | Gm13034   | - | processed_pseud<br>ogene | - | - |
| ENSMUSG00000<br>082465 | 108.34 | 0.235 | -2.09  | 2.08072E-11 | 1.90757E-09 | Rps6-ps3  | - | processed_pseud<br>ogene | - | - |
| ENSMUSG00000<br>082609 | 18.89  | 0.177 | -2.501 | 8.66441E-05 | 0.00058137  | Gm15464   | - | processed_pseud<br>ogene | - | - |
| ENSMUSG00000<br>082705 | 8.33   | 0.064 | -3.957 | 1.86294E-06 | 2.53213E-05 | Gm15616   | - | processed_pseud<br>ogene | - | - |
| ENSMUSG00000<br>082741 | 17.39  | 0.201 | -2.314 | 7.70445E-06 | 8.08652E-05 | Gm9703    | - | processed_pseud<br>ogene | - | - |
| ENSMUSG00000<br>082755 | 11.96  | 0.11  | -3.178 | 2.04485E-06 | 2.72282E-05 | Gm8692    | - | processed_pseud<br>ogene | - | - |
| ENSMUSG00000<br>082769 | 6.2    | 0.047 | -4.406 | 2.90006E-06 | 3.64669E-05 | Gm15793   | - | processed_pseud<br>ogene | - | - |
| ENSMUSG00000<br>082895 | 33.08  | 0.175 | -2.512 | 6.86064E-10 | 3.71096E-08 | Rpsa-ps9  | - | processed_pseud<br>ogene | - | - |
| ENSMUSG00000<br>082901 | 194.18 | 0.232 | -2.107 | 1.6981E-11  | 1.62304E-09 | Gm14323   | - | processed_pseud<br>ogene | - | - |
| ENSMUSG00000<br>082908 | 10.19  | 0.212 | -2.238 | 0.001589464 | 0.006159388 | Gm13736   | - | processed_pseud<br>ogene | - | - |
| ENSMUSG00000<br>082926 | 92.78  | 0.249 | -2.005 | 2.05342E-10 | 1.29466E-08 | Gm8172    | - | processed_pseud<br>ogene | - | - |
| ENSMUSG00000<br>082978 | 5.82   | 0.147 | -2.765 | 0.001061108 | 0.004430076 | Rpsa-ps11 | - | processed_pseud<br>ogene | - | - |
| ENSMUSG00000<br>083033 | 15.1   | 0.239 | -2.066 | 0.000516447 | 0.0024622   | Gm9083    | - | processed_pseud<br>ogene | - | - |
| ENSMUSG00000<br>083311 | 6.7    | 0.206 | -2.279 | 0.002482963 | 0.008824439 | Gm5643    | - | processed_pseud<br>ogene | - | - |
| ENSMUSG00000<br>083328 | 8.94   | 0.087 | -3.521 | 9.89615E-06 | 9.86814E-05 | Gm11826   | - | processed_pseud<br>ogene | - | - |
| ENSMUSG00000<br>083337 | 36.17  | 0.191 | -2.392 | 1.50798E-09 | 7.38337E-08 | Gm11539   | - | processed_pseud<br>ogene | - | - |
| ENSMUSG00000<br>083500 | 2.57   | 0.024 | -5.382 | 0.000231696 | 0.001287445 | Gm15470   | - | processed_pseud<br>ogene | - | - |
| ENSMUSG00000<br>083619 | 196.16 | 0.236 | -2.082 | 3.08993E-11 | 2.61901E-09 | Gm14414   | - | processed_pseud<br>ogene | - | - |
| ENSMUSG00000<br>083716 | 87.89  | 0.216 | -2.211 | 2.02416E-08 | 6.09248E-07 | Gm13436   | - | processed_pseud<br>ogene | - | - |
| ENSMUSG00000<br>083754 | 27.33  | 0.146 | -2.779 | 1.0866E-07  | 2.39486E-06 | Gm7803    | - | processed_pseud<br>ogene | - | - |
| ENSMUSG00000<br>083985 | 13.01  | 0.077 | -3.699 | 2.86543E-08 | 7.99518E-07 | Gm12468   | - | processed_pseud<br>ogene | - | - |

|                    |        |        |        |             |             |               |                                                   |                      |           |      |
|--------------------|--------|--------|--------|-------------|-------------|---------------|---------------------------------------------------|----------------------|-----------|------|
| ENSMUSG00000083992 | 57.81  | 0.114  | -3.136 | 4.71823E-09 | 1.88404E-07 | Gm11478       | 60S ribosomal protein L13a-like                   | processed_pseudogene | 100504632 | -    |
| ENSMUSG00000084106 | 224.28 | 0.215  | -2.219 | 9.51215E-11 | 6.92E-09    | Gm6136        | -                                                 | processed_pseudogene | -         | -    |
| ENSMUSG00000084166 | 4.05   | 0.015  | -6.017 | 1.76646E-05 | 0.000160472 | Gm6451        | -                                                 | processed_pseudogene | -         | -    |
| ENSMUSG00000084314 | 11.33  | 0.192  | -2.381 | 0.000230455 | 0.001282299 | Rps15a-ps3    | -                                                 | processed_pseudogene | -         | -    |
| ENSMUSG00000084349 | 245.37 | 0.211  | -2.244 | 6.20405E-09 | 2.35191E-07 | Rpl3-ps1      | -                                                 | processed_pseudogene | -         | -    |
| ENSMUSG00000084416 | 202.05 | 0.209  | -2.257 | 9.00267E-12 | 9.29707E-10 | Rpl10a-ps1    | -                                                 | processed_pseudogene | -         | -    |
| ENSMUSG00000084757 | 7.09   | 13.024 | 3.703  | 5.09095E-06 | 5.7752E-05  | 1700057H15Rik | -                                                 | lincRNA              | -         | -    |
| ENSMUSG00000084787 | 4.84   | 4.334  | 2.116  | 0.004010793 | 0.013002563 | Gm12436       | predicted gene 12436                              | lincRNA              | 102635202 | -    |
| ENSMUSG00000084899 | 23.52  | 0.246  | -2.025 | 6.59657E-05 | 0.000465203 | Gm15344       | -                                                 | processed_transcript | -         | -    |
| ENSMUSG00000084967 | 13.06  | 4.505  | 2.172  | 0.000315897 | 0.001650095 | Gm12296       | -                                                 | processed_transcript | -         | -    |
| ENSMUSG00000084970 | 23.96  | 8.167  | 3.03   | 6.85297E-10 | 3.71096E-08 | 1700060J05Rik | -                                                 | antisense_RNA        | -         | -    |
| ENSMUSG00000084973 | 10.88  | 6.425  | 2.684  | 2.34555E-05 | 0.000202048 | Gm13848       | predicted gene 13848                              | lincRNA              | 434003    | -    |
| ENSMUSG00000084992 | 67.51  | 4.407  | 2.14   | 1.19299E-05 | 0.000115687 | Gm13842       | -                                                 | lincRNA              | -         | -    |
| ENSMUSG00000085004 | 6.25   | 4.697  | 2.232  | 0.00215474  | 0.007885647 | 5430427M07Rik | RIKEN cDNA 5430427M07 gene                        | antisense_RNA        | 71349     | -    |
| ENSMUSG00000085089 | 8.15   | 0.098  | -3.356 | 3.5871E-05  | 0.000285966 | Arhgap15os    | Rho GTPase activating protein 15, opposite strand | antisense_RNA        | 320872    | -    |
| ENSMUSG00000085111 | 58.25  | 0.188  | -2.41  | 7.22461E-08 | 1.7059E-06  | Ascl4         | achaete-scute family bHLH transcription factor 4  | protein_coding       | 67341     | bHLH |
| ENSMUSG00000085162 | 8.04   | 4.901  | 2.293  | 0.001304617 | 0.005243271 | Gm12295       | predicted gene 12295                              | lincRNA              | 327946    | -    |
| ENSMUSG00000085213 | 16.44  | 0.24   | -2.061 | 6.3691E-05  | 0.000451822 | Gm13091       | -                                                 | antisense_RNA        | -         | -    |
| ENSMUSG00000085223 | 5.19   | 6.567  | 2.715  | 0.007855727 | 0.022342443 | Gm11210       | -                                                 | lincRNA              | -         | -    |
| ENSMUSG00000085261 | 4.08   | 6.486  | 2.697  | 0.008479038 | 0.02376167  | Gm13814       | -                                                 | lincRNA              | -         | -    |
| ENSMUSG00000085287 | 13.76  | 6.362  | 2.67   | 5.18194E-05 | 0.000382871 | 4833418N02Rik | RIKEN cDNA 4833418N02 gene                        | lincRNA              | 74597     | -    |
| ENSMUSG00000085297 | 206.78 | 9.813  | 3.295  | 0.001463813 | 0.005764464 | Gm11651       | predicted gene 11651                              | antisense_RNA        | 100379610 | -    |
| ENSMUSG00000085301 | 24.42  | 6.946  | 2.796  | 8.34825E-07 | 1.30345E-05 | Gm12132       | predicted gene 12132                              | lincRNA              | 102637264 | -    |
| ENSMUSG00000085323 | 6.8    | 4.436  | 2.149  | 0.004912446 | 0.015319637 | 9130410C08Rik | -                                                 | antisense_RNA        | -         | -    |

|                    |       |       |        |             |             |               |   |                                                     |                                |           |   |
|--------------------|-------|-------|--------|-------------|-------------|---------------|---|-----------------------------------------------------|--------------------------------|-----------|---|
| ENSMUSG00000085331 | 42.42 | 6.937 | 2.794  | 5.69651E-08 | 1.40799E-06 | Gm11274       | - |                                                     | lincRNA                        | -         | - |
| ENSMUSG00000085348 | 4.52  | 6.71  | 2.746  | 0.008237329 | 0.023196453 | Myhas         | - |                                                     | antisense_RNA                  | -         | - |
| ENSMUSG00000085385 | 13.25 | 0.238 | -2.072 | 0.002699031 | 0.009424579 | Snhg17        | - |                                                     | processed_transcript           | -         | - |
| ENSMUSG00000085402 | 36.72 | 0.196 | -2.348 | 2.22495E-07 | 4.37426E-06 | Gm12111       | - |                                                     | lincRNA                        | -         | - |
| ENSMUSG00000085440 | 7.77  | 4.441 | 2.151  | 0.003529475 | 0.011718614 | Sorbs2os      |   | sorbin and SH3 domain containing 2, opposite strand | antisense_RNA                  | 319940    | - |
| ENSMUSG00000085456 | 10.16 | 4.434 | 2.149  | 0.001245176 | 0.005050693 | Gm15398       | - |                                                     | lincRNA                        | -         | - |
| ENSMUSG00000085498 | 6.3   | 6.579 | 2.718  | 0.000172742 | 0.001012474 | Gm14023       |   | predicted gene 14023                                | processed_transcript           | 100503468 | - |
| ENSMUSG00000085510 | 5.68  | 4.363 | 2.125  | 0.015947841 | 0.039191295 | Gm12082       | - |                                                     | lincRNA                        | -         | - |
| ENSMUSG00000085515 | 5.1   | 5.573 | 2.478  | 0.000935797 | 0.003992245 | C630028M04Rik |   | RIKEN cDNA C630028M04 gene                          | lincRNA                        | 329844    | - |
| ENSMUSG00000085516 | 22.58 | 0.177 | -2.497 | 2.40821E-08 | 6.97953E-07 | 4930538E20Rik |   | RIKEN cDNA 4930538E20 gene                          | antisense_RNA                  | 78200     | - |
| ENSMUSG00000085522 | 9.8   | 4.697 | 2.232  | 0.006474483 | 0.019144311 | 4930556G01Rik | - |                                                     | lincRNA                        | -         | - |
| ENSMUSG00000085576 | 9.5   | 4.626 | 2.21   | 0.00185751  | 0.006984221 | Dpy19l2       |   | dpy-19-like 2 (C. elegans)                          | protein_coding                 | 320752    | - |
| ENSMUSG00000085720 | 97.6  | 4.587 | 2.198  | 7.12403E-09 | 2.61783E-07 | Gm7854        |   | predicted gene 7854                                 | antisense_RNA                  | 665934    | - |
| ENSMUSG00000085721 | 5.14  | 6.505 | 2.702  | 0.00117241  | 0.004804982 | Gm12796       | - |                                                     | lincRNA                        | -         | - |
| ENSMUSG00000085731 | 7.47  | 0.232 | -2.105 | 0.013366557 | 0.03403481  | Gm16229       | - |                                                     | antisense_RNA                  | -         | - |
| ENSMUSG00000085788 | 18.68 | 0.19  | -2.397 | 3.51454E-06 | 4.27864E-05 | 4930470G03Rik | - |                                                     | bidirectional_promoter_lincRNA | -         | - |
| ENSMUSG00000085853 | 5.9   | 0.088 | -3.508 | 0.000181044 | 0.001053832 | Gm12167       | - |                                                     | antisense_RNA                  | -         | - |
| ENSMUSG00000085887 | 17.29 | 0.154 | -2.699 | 6.93025E-07 | 1.11887E-05 | Arhgap27os3   |   | Rho GTPase activating protein 27, opposite strand 3 | antisense_RNA                  | 653030    | - |
| ENSMUSG00000085899 | 11.37 | 4.908 | 2.295  | 0.000280094 | 0.001494057 | Gm15338       | - |                                                     | sense_intronic                 | -         | - |
| ENSMUSG00000085911 | 5.93  | 4.647 | 2.216  | 0.00349505  | 0.011632257 | Gm14061       | - |                                                     | lincRNA                        | -         | - |
| ENSMUSG00000085931 | 22.14 | 4.433 | 2.148  | 1.19495E-06 | 1.75282E-05 | Gm12648       | - |                                                     | lincRNA                        | -         | - |
| ENSMUSG00000085945 | 9.67  | 4.647 | 2.216  | 0.007246303 | 0.020937259 | 2310014F06Rik | - |                                                     | bidirectional_promoter_lincRNA | -         | - |
| ENSMUSG00000085971 | 15.23 | 0.154 | -2.698 | 6.53828E-06 | 7.04778E-05 | Gm15411       | - |                                                     | processed_transcript           | -         | - |
| ENSMUSG00000085995 | 11.55 | 4.383 | 2.132  | 0.004293632 | 0.013764901 | Gm2788        | - |                                                     | processed_transcript           | -         | - |

|                    |        |        |        |             |             |               |                                                                 |                                  |           |   |
|--------------------|--------|--------|--------|-------------|-------------|---------------|-----------------------------------------------------------------|----------------------------------|-----------|---|
| ENSMUSG00000086020 | 21.28  | 4.106  | 2.038  | 6.78075E-05 | 0.000475579 | Gm12239       | -                                                               | antisense_RNA                    | -         | - |
| ENSMUSG00000086026 | 8.42   | 4.158  | 2.056  | 0.001375118 | 0.0054717   | Gm12374       | predicted gene 12374                                            | lincRNA                          | 102636890 | - |
| ENSMUSG00000086068 | 22.47  | 7.121  | 2.832  | 1.09364E-07 | 2.39913E-06 | 1700120G11Rik | -                                                               | lincRNA                          | -         | - |
| ENSMUSG00000086123 | 5.64   | 0.096  | -3.376 | 0.000190149 | 0.001096176 | Gm16060       | -                                                               | processed_pseudogene             | -         | - |
| ENSMUSG00000086146 | 14.08  | 4.036  | 2.013  | 0.001630958 | 0.006287428 | Gm15729       | -                                                               | antisense_RNA                    | -         | - |
| ENSMUSG00000086199 | 60.22  | 5.81   | 2.538  | 2.75488E-05 | 0.000230673 | Bcas3os1      | breast carcinoma amplified sequence 3, opposite strand 1        | antisense_RNA                    | 71489     | - |
| ENSMUSG00000086204 | 8.22   | 6.852  | 2.777  | 0.000584096 | 0.002722599 | Gm15668       | -                                                               | lincRNA                          | -         | - |
| ENSMUSG00000086241 | 4.55   | 0.197  | -2.347 | 0.018836041 | 0.044942878 | 4930483K19Rik | RIKEN cDNA 4930483K19 gene                                      | antisense_RNA                    | 74953     | - |
| ENSMUSG00000086245 | 32.22  | 0.061  | -4.035 | 4.16464E-16 | 1.33633E-13 | Gm16170       | -                                                               | antisense_RNA                    | -         | - |
| ENSMUSG00000086249 | 22.25  | 4.203  | 2.071  | 1.77306E-05 | 0.000160991 | Gm12724       | -                                                               | processed_transcript             | -         | - |
| ENSMUSG00000086254 | 7.73   | 4.85   | 2.278  | 0.005229534 | 0.016132103 | 3100003L05Rik | RIKEN cDNA 3100003L05 gene                                      | lincRNA                          | 73076     | - |
| ENSMUSG00000086266 | 4.83   | 4.795  | 2.261  | 0.002783705 | 0.009660177 | Igf2os        | insulin-like growth factor 2, opposite strand                   | antisense_RNA                    | 111975    | - |
| ENSMUSG00000086312 | 10.42  | 5.882  | 2.556  | 0.001203243 | 0.004906074 | Gm15336       | -                                                               | antisense_RNA                    | -         | - |
| ENSMUSG00000086354 | 13.85  | 5.369  | 2.425  | 0.001156679 | 0.0047518   | Gm13938       | -                                                               | antisense_RNA                    | -         | - |
| ENSMUSG00000086379 | 5.08   | 8.685  | 3.119  | 8.96074E-05 | 0.00059746  | 1700026D11Rik | RIKEN cDNA 1700026D11 gene                                      | antisense_RNA                    | 70371     | - |
| ENSMUSG00000086404 | 4.15   | 11.402 | 3.511  | 0.002537939 | 0.008982515 | Gm6787        | proteasome (prosome, macropain) subunit, beta type 7 pseudogene | processed_transcript             | 627782    | - |
| ENSMUSG00000086410 | 14.85  | 0.156  | -2.682 | 1.15682E-05 | 0.000112727 | Gm16158       | -                                                               | antisense_RNA                    | -         | - |
| ENSMUSG00000086427 | 4.17   | 8.199  | 3.035  | 0.011378466 | 0.030054736 | Hoxa11os      | homeobox A11, opposite strand                                   | processed_transcript             | 15397     | - |
| ENSMUSG00000086506 | 4.59   | 0.013  | -6.266 | 5.61557E-06 | 6.26495E-05 | Gm15911       | -                                                               | antisense_RNA                    | -         | - |
| ENSMUSG00000086509 | 15.14  | 5.099  | 2.35   | 0.000134008 | 0.000828913 | Nkx2-2os      | NK2 homeobox 2, opposite strand                                 | antisense_RNA                    | 100313531 | - |
| ENSMUSG00000086583 | 585.79 | 0.204  | -2.294 | 9.65719E-10 | 4.97221E-08 | Gm15500       | -                                                               | transcribed_processed_pseudogene | -         | - |
| ENSMUSG00000086596 | 5.94   | 6.302  | 2.656  | 0.006852184 | 0.020023889 | Susd5         | sushi domain containing 5                                       | protein_coding                   | 382111    | - |
| ENSMUSG00000086610 | 5.15   | 0.056  | -4.154 | 2.18878E-05 | 0.000191109 | Gm15408       | predicted gene 15408                                            | lincRNA                          | 100503307 | - |
| ENSMUSG00000086628 | 3.47   | 0.159  | -2.651 | 0.005237307 | 0.016147763 | Gm16157       | predicted gene 16157                                            | antisense_RNA                    | 100504026 | - |



|                    |       |        |        |             |             |               |   |                                                                  |                        |           |   |
|--------------------|-------|--------|--------|-------------|-------------|---------------|---|------------------------------------------------------------------|------------------------|-----------|---|
| ENSMUSG00000086631 | 7.65  | 8.101  | 3.018  | 0.000219551 | 0.001232849 | Gm12784       | - |                                                                  | lincRNA                | -         | - |
| ENSMUSG00000086656 | 4.7   | 0.065  | -3.951 | 0.000200238 | 0.001143334 | Gm15701       | - |                                                                  | antisense_RNA          | -         | - |
| ENSMUSG00000086718 | 17.63 | 0.221  | -2.179 | 7.51533E-05 | 0.000517605 | Gm16069       | - |                                                                  | antisense_RNA          | -         | - |
| ENSMUSG00000086727 | 40.62 | 7.266  | 2.861  | 6.74019E-07 | 1.0921E-05  | 4931428L18Rik |   | RIKEN cDNA 4931428L18 gene                                       | protein_coding         | 70988     | - |
| ENSMUSG00000086745 | 15.98 | 4.373  | 2.129  | 0.013836849 | 0.034954919 | Tspan2os      |   | tetraspanin 2, opposite strand                                   | antisense_RNA          | 78491     | - |
| ENSMUSG00000086804 | 28.4  | 4.286  | 2.1    | 4.86536E-05 | 0.000365315 | Gm43154       | - |                                                                  | lincRNA                | -         | - |
| ENSMUSG00000086807 | 10.18 | 4.476  | 2.162  | 0.001060295 | 0.004429772 | Platr21       |   | pluripotency associated transcript 21                            | processed_transcript   | 78526     | - |
| ENSMUSG00000086825 | 39.38 | 0.097  | -3.369 | 8.4094E-12  | 8.7346E-10  | Gm15675       | - |                                                                  | lincRNA                | -         | - |
| ENSMUSG00000086899 | 11.71 | 10.491 | 3.391  | 0.000152571 | 0.000919916 | 1600002D24Rik | - |                                                                  | lincRNA                | -         | - |
| ENSMUSG00000086922 | 6.75  | 0.125  | -2.994 | 0.00020206  | 0.001151541 | Gm13835       | - |                                                                  | processed_pseudogene   | -         | - |
| ENSMUSG00000086927 | 6.04  | 6.64   | 2.731  | 0.000170723 | 0.001003834 | Gm11823       |   | predicted gene 11823                                             | lincRNA                | 329797    | - |
| ENSMUSG00000087038 | 14.74 | 4.508  | 2.172  | 4.3546E-05  | 0.000333537 | 2900079G21Rik |   | RIKEN cDNA 2900079G21 gene                                       | lincRNA                | 620760    | - |
| ENSMUSG00000087059 | 6.94  | 9.557  | 3.257  | 5.13562E-05 | 0.000380387 | Gm12339       | - |                                                                  | processed_transcript   | -         | - |
| ENSMUSG00000087115 | 7.06  | 4.549  | 2.185  | 0.001496166 | 0.005859474 | Pcsk2os2      |   | proprotein convertase subtilisin/kexin type 2, opposite strand 2 | antisense_RNA          | 378775    | - |
| ENSMUSG00000087138 | 11.21 | 0.068  | -3.886 | 5.56933E-07 | 9.39094E-06 | Gm15545       |   | predicted gene 15545                                             | antisense_RNA          | 100502630 | - |
| ENSMUSG00000087153 | 69.7  | 0.137  | -2.872 | 2.78348E-14 | 6.41236E-12 | Gm6483        | - |                                                                  | unprocessed_pseudogene | -         | - |
| ENSMUSG00000087170 | 9.44  | 6.545  | 2.71   | 0.001016729 | 0.004277594 | 1700001G01Rik |   | RIKEN cDNA 1700001G01 gene                                       | lincRNA                | 75433     | - |
| ENSMUSG00000087176 | 7.1   | 6.266  | 2.648  | 0.00158111  | 0.006133628 | D230022J07Rik | - |                                                                  | processed_transcript   | -         | - |
| ENSMUSG00000087184 | 3.64  | 10.008 | 3.323  | 0.004439579 | 0.014121931 | Gm11650       |   | uncharacterized LOC108167931                                     | processed_transcript   | 108167931 | - |
| ENSMUSG00000087187 | 32.27 | 4.029  | 2.011  | 0.000466007 | 0.002266218 | Gm13431       | - |                                                                  | lincRNA                | -         | - |
| ENSMUSG00000087230 | 5.34  | 6.253  | 2.644  | 0.000323688 | 0.001682483 | Mroh3         |   | maestro heat-like repeat family member 3                         | protein_coding         | 76422     | - |
| ENSMUSG00000087264 | 10.21 | 7.115  | 2.831  | 0.000138376 | 0.00085073  | Gad1os        |   | glutamate decarboxylase 1, opposite strand                       | antisense_RNA          | 68986     | - |
| ENSMUSG00000087268 | 4.45  | 6.191  | 2.63   | 0.012142565 | 0.031644633 | Gm14486       | - |                                                                  | lincRNA                | -         | - |
| ENSMUSG00000087291 | 15.5  | 5.864  | 2.552  | 2.49371E-05 | 0.000212166 | Gm11946       | - |                                                                  | processed_transcript   | -         | - |

|                    |       |        |        |             |             |               |                                                   |                                  |           |   |
|--------------------|-------|--------|--------|-------------|-------------|---------------|---------------------------------------------------|----------------------------------|-----------|---|
| ENSMUSG00000087306 | 14.41 | 5.338  | 2.416  | 0.003840161 | 0.012557572 | A230004M16Rik | RIKEN cDNA A230004M16 gene                        | processed_transcript             | 102637814 | - |
| ENSMUSG00000087354 | 5.98  | 0.194  | -2.365 | 0.007685084 | 0.021954415 | 4930404I05Rik | RIKEN cDNA 4930404I05 gene                        | processed_transcript             | 67394     | - |
| ENSMUSG00000087406 | 7.47  | 0.227  | -2.142 | 0.003111913 | 0.010582505 | E130215H24Rik | RIKEN cDNA E130215H24 gene                        | processed_transcript             | 109344    | - |
| ENSMUSG00000087412 | 24.79 | 0.148  | -2.758 | 2.62458E-08 | 7.47402E-07 | Gm15501       | -                                                 | transcribed_processed_pseudogene | -         | - |
| ENSMUSG00000087459 | 4.89  | 9.634  | 3.268  | 0.003256394 | 0.010984447 | Csmd2os       | CUB and Sushi multiple domains 2, opposite strand | antisense_RNA                    | 74989     | - |
| ENSMUSG00000087486 | 13.77 | 0.151  | -2.73  | 2.13988E-05 | 0.000187568 | Gm11723       | -                                                 | antisense_RNA                    | -         | - |
| ENSMUSG00000087492 | 4.62  | 8.973  | 3.166  | 0.002627846 | 0.009226213 | Gm15700       | -                                                 | antisense_RNA                    | -         | - |
| ENSMUSG00000087516 | 16.42 | 6.048  | 2.596  | 9.11228E-06 | 9.25599E-05 | Tbx3os1       | expressed sequence AW549542                       | antisense_RNA                    | 100993    | - |
| ENSMUSG00000087538 | 15.16 | 0.156  | -2.677 | 1.96351E-06 | 2.63104E-05 | Gm16341       | -                                                 | antisense_RNA                    | -         | - |
| ENSMUSG00000087541 | 7.75  | 0.138  | -2.86  | 0.000626801 | 0.002880558 | Hopxos        | -                                                 | antisense_RNA                    | -         | - |
| ENSMUSG00000087593 | 5.36  | 6.096  | 2.608  | 0.012061326 | 0.03146943  | Gm16174       | -                                                 | antisense_RNA                    | -         | - |
| ENSMUSG00000087594 | 8.28  | 6.462  | 2.692  | 0.000255598 | 0.001390506 | BC039771      | -                                                 | processed_transcript             | -         | - |
| ENSMUSG00000087606 | 7.37  | 5.335  | 2.415  | 0.00240477  | 0.008609544 | Gm16121       | -                                                 | antisense_RNA                    | -         | - |
| ENSMUSG00000087612 | 18.99 | 0.052  | -4.254 | 1.69436E-09 | 8.20644E-08 | A230005M16Rik | -                                                 | antisense_RNA                    | -         | - |
| ENSMUSG00000087614 | 14.14 | 4.073  | 2.026  | 0.000473396 | 0.002293465 | Gm12514       | -                                                 | lincRNA                          | -         | - |
| ENSMUSG00000087626 | 37.26 | 9.68   | 3.275  | 2.41744E-07 | 4.68598E-06 | Gm15050       | predicted gene 15050                              | antisense_RNA                    | 100504154 | - |
| ENSMUSG00000087658 | 45.41 | 4.436  | 2.149  | 8.35197E-05 | 0.000563773 | Hotairm1      | Hoxa transcript antisense RNA, myeloid-specific 1 | antisense_RNA                    | 105242658 | - |
| ENSMUSG00000087691 | 48.39 | 0.088  | -3.509 | 2.38504E-13 | 4.0816E-11  | Gm15674       | predicted gene 15674                              | antisense_RNA                    | 102640368 | - |
| ENSMUSG00000089635 | 5.74  | 4.176  | 2.062  | 0.012251851 | 0.031827891 | Gm16559       | -                                                 | antisense_RNA                    | -         | - |
| ENSMUSG00000089656 | 12.08 | 12.064 | 3.593  | 2.9505E-05  | 0.000243236 | Gm16271       | -                                                 | antisense_RNA                    | -         | - |
| ENSMUSG00000089671 | 4.18  | 4.513  | 2.174  | 0.020762252 | 0.048476728 | Gm16537       | -                                                 | antisense_RNA                    | -         | - |
| ENSMUSG00000089683 | 21.01 | 0.238  | -2.069 | 2.83765E-05 | 0.000235954 | 4930570N18Rik | -                                                 | antisense_RNA                    | -         | - |
| ENSMUSG00000089715 | 21.01 | 0.204  | -2.294 | 4.13327E-05 | 0.000319995 | Cbx6          | chromobox 6                                       | protein_coding                   | 494448    | - |
| ENSMUSG00000089722 | 26.41 | 8.155  | 3.028  | 0.000174017 | 0.001018539 | Cd300ld5      | CD300 molecule like family member D5              | protein_coding                   | 100043125 | - |

|                    |         |       |        |             |             |               |                                                              |                                  |           |         |
|--------------------|---------|-------|--------|-------------|-------------|---------------|--------------------------------------------------------------|----------------------------------|-----------|---------|
| ENSMUSG00000089776 | 7.49    | 9.615 | 3.265  | 0.000442895 | 0.00217978  | Gm15684       | -                                                            | antisense_RNA                    | -         | -       |
| ENSMUSG00000089787 | 8.14    | 4.32  | 2.111  | 0.002039285 | 0.0075337   | Gm15825       | predicted gene 15825                                         | antisense_RNA                    | 102635013 | -       |
| ENSMUSG00000089803 | 12.48   | 0.176 | -2.506 | 0.000361555 | 0.001837568 | Gm10171       | -                                                            | processed_pseudogene             | -         | -       |
| ENSMUSG00000089844 | 31.2    | 0.213 | -2.228 | 3.62879E-05 | 0.000288011 | A530032D15Rik | RIKEN cDNA A530032D15Rik gene                                | protein_coding                   | 381287    | -       |
| ENSMUSG00000089857 | 9.5     | 0.238 | -2.074 | 0.001677118 | 0.006435219 | Zfp882        | zinc finger protein 882                                      | protein_coding                   | 382019    | zf-C2H2 |
| ENSMUSG00000089922 | 5.16    | 9.758 | 3.287  | 0.000853188 | 0.003707602 | Gm43517       | -                                                            | protein_coding                   | -         | -       |
| ENSMUSG00000089964 | 8.16    | 4.844 | 2.276  | 0.002355193 | 0.008479356 | Gm16582       | -                                                            | processed_transcript             | -         | -       |
| ENSMUSG00000089989 | 2958.55 | 0.205 | -2.285 | 3.29827E-07 | 6.07227E-06 | Gm45713       | -                                                            | protein_coding                   | -         | -       |
| ENSMUSG00000089993 | 12.4    | 0.199 | -2.329 | 0.00011054  | 0.000707872 | Gm5822        | -                                                            | processed_pseudogene             | -         | -       |
| ENSMUSG00000089997 | 5.62    | 6.875 | 2.781  | 0.000603957 | 0.002794158 | 1810020O05Rik | Riken cDNA 1810020O05 gene                                   | lincRNA                          | 613264    | -       |
| ENSMUSG00000089998 | 15.67   | 0.171 | -2.545 | 0.000111959 | 0.000715177 | Phtf1os       | putative homeodomain transcription factor 1, opposite strand | antisense_RNA                    | 100125931 | -       |
| ENSMUSG00000090019 | 139.73  | 0.161 | -2.631 | 3.51025E-09 | 1.47186E-07 | Gimap1        | GTPase, IMAP family member 1                                 | protein_coding                   | 16205     | -       |
| ENSMUSG00000090053 | 28.45   | 4.1   | 2.036  | 3.17274E-07 | 5.87137E-06 | Palm2         | paralemmin 2                                                 | protein_coding                   | 242481    | -       |
| ENSMUSG00000090062 | 21.18   | 0.217 | -2.203 | 3.22414E-05 | 0.000261674 | Galnt6os      | -                                                            | antisense_RNA                    | -         | -       |
| ENSMUSG00000090063 | 4.67    | 4.825 | 2.27   | 0.012212201 | 0.03175243  | Dlx6os1       | -                                                            | antisense_RNA                    | -         | -       |
| ENSMUSG00000090069 | 104.22  | 0.184 | -2.442 | 1.14555E-09 | 5.77881E-08 | E430024P14Rik | -                                                            | antisense_RNA                    | -         | -       |
| ENSMUSG00000090071 | 6.14    | 4.578 | 2.195  | 0.010832624 | 0.02895295  | Cdk5r2        | cyclin-dependent kinase 5, regulatory subunit 2 (p39)        | protein_coding                   | 12570     | -       |
| ENSMUSG00000090077 | 64.45   | 0.184 | -2.441 | 4.85338E-09 | 1.92518E-07 | Lime1         | Lck interacting transmembrane adaptor 1                      | protein_coding                   | 72699     | -       |
| ENSMUSG00000090084 | 8.33    | 7.42  | 2.891  | 0.000111201 | 0.000711597 | Srpx          | sushi-repeat-containing protein                              | protein_coding                   | 51795     | -       |
| ENSMUSG00000090116 | 8.02    | 6.475 | 2.695  | 0.000297259 | 0.001569628 | Gm15680       | -                                                            | sense_overlapping                | -         | -       |
| ENSMUSG00000090126 | 22.9    | 0.249 | -2.005 | 1.0369E-05  | 0.000102656 | 4930519F09Rik | -                                                            | transcribed_processed_pseudogene | -         | -       |
| ENSMUSG00000090207 | 9.97    | 0.158 | -2.659 | 8.70554E-05 | 0.000583895 | 4930524O07Rik | -                                                            | antisense_RNA                    | -         | -       |
| ENSMUSG00000090219 | 132.87  | 5.346 | 2.418  | 0.000344651 | 0.001769929 | 4930516K23Rik | olfactory receptor 643                                       | protein_coding                   | 259081    | -       |
| ENSMUSG00000090222 | 41.46   | 0.162 | -2.628 | 3.12464E-09 | 1.34002E-07 | Ifi203-ps     | -                                                            | unprocessed_pseudogene           | -         | -       |

|                    |         |        |        |             |             |               |                                       |                      |        |   |
|--------------------|---------|--------|--------|-------------|-------------|---------------|---------------------------------------|----------------------|--------|---|
| ENSMUSG00000090223 | 7.22    | 4.33   | 2.114  | 0.004384191 | 0.013990325 | Pcp4          | Purkinje cell protein 4               | protein_coding       | 18546  | - |
| ENSMUSG00000090291 | 9.24    | 6.957  | 2.799  | 0.000142148 | 0.000868795 | Lrrc10b       | leucine rich repeat containing 10B    | protein_coding       | 278795 | - |
| ENSMUSG00000090322 | 16.64   | 0.231  | -2.113 | 0.000613273 | 0.002831424 | Gm17090       | -                                     | antisense_RNA        | -      | - |
| ENSMUSG00000090336 | 31.02   | 6.278  | 2.65   | 9.96124E-09 | 3.45547E-07 | 4932443119Rik | CFAP97 domain containing 2            | protein_coding       | 403185 | - |
| ENSMUSG00000090516 | 43.17   | 0.172  | -2.543 | 1.96807E-10 | 1.24962E-08 | Rps11-ps1     | -                                     | processed_pseudogene | -      | - |
| ENSMUSG00000090608 | 28.29   | 0.243  | -2.044 | 0.000101688 | 0.000662519 | Gm17200       | -                                     | lincRNA              | -      | - |
| ENSMUSG00000090674 | 19.05   | 0.226  | -2.143 | 0.000724354 | 0.003236984 | Gm17082       | -                                     | processed_pseudogene | -      | - |
| ENSMUSG00000090707 | 97.05   | 4.545  | 2.184  | 2.1498E-08  | 6.36133E-07 | Gm8237        | -                                     | protein_coding       | -      | - |
| ENSMUSG00000090733 | 1442.08 | 0.216  | -2.213 | 7.21845E-09 | 2.63635E-07 | Rps27         | ribosomal protein S27                 | protein_coding       | 57294  | - |
| ENSMUSG00000090861 | 26.08   | 0.214  | -2.224 | 5.6651E-06  | 6.30708E-05 | Arf4os        | -                                     | antisense_RNA        | -      | - |
| ENSMUSG00000090877 | 57.16   | 11.197 | 3.485  | 1.42027E-12 | 1.9334E-10  | Hspa1b        | heat shock protein 1B                 | protein_coding       | 15511  | - |
| ENSMUSG00000090958 | 15.79   | 4.451  | 2.154  | 0.000496485 | 0.002379343 | Lrrc32        | leucine rich repeat containing 32     | protein_coding       | 434215 | - |
| ENSMUSG00000090964 | 5.17    | 0.159  | -2.652 | 0.005497888 | 0.016789862 | Gm17206       | -                                     | antisense_RNA        | -      | - |
| ENSMUSG00000091055 | 12.25   | 6.508  | 2.702  | 9.66967E-05 | 0.000635764 | Siglec15      | sialic acid binding Ig-like lectin 15 | protein_coding       | 620235 | - |
| ENSMUSG00000091086 | 73.52   | 0.198  | -2.34  | 1.77859E-12 | 2.29924E-10 | Rpl6l         | -                                     | processed_pseudogene | -      | - |
| ENSMUSG00000091144 | 22.71   | 0.175  | -2.516 | 7.77536E-08 | 1.81258E-06 | Phf11c        | PHD finger protein 11C                | protein_coding       | 628705 | - |
| ENSMUSG00000091192 | 8.49    | 9.498  | 3.248  | 0.000204485 | 0.001162024 | Sardhos       | -                                     | antisense_RNA        | -      | - |
| ENSMUSG00000091228 | 191.78  | 0.209  | -2.258 | 6.47635E-09 | 2.41941E-07 | Gm20390       | -                                     | protein_coding       | -      | - |
| ENSMUSG00000091275 | 118.53  | 4.835  | 2.273  | 8.12375E-08 | 1.86909E-06 | Gm3248        | -                                     | protein_coding       | -      | - |
| ENSMUSG00000091345 | 8.52    | 4.322  | 2.112  | 0.010198693 | 0.027537237 | Col6a5        | collagen, type VI, alpha 5            | protein_coding       | 665033 | - |
| ENSMUSG00000091514 | 9.37    | 0.079  | -3.653 | 1.1268E-05  | 0.000110341 | Gm17484       | -                                     | lincRNA              | -      | - |
| ENSMUSG00000091562 | 4.85    | 5.04   | 2.334  | 0.00679868  | 0.019896658 | Crybg3        | -                                     | processed_transcript | -      | - |
| ENSMUSG00000091568 | 80.25   | 5.686  | 2.507  | 3.89736E-09 | 1.60255E-07 | Gm8206        | -                                     | protein_coding       | -      | - |
| ENSMUSG00000091613 | 95.79   | 4.593  | 2.2    | 2.32261E-08 | 6.78616E-07 | Gm17046       | -                                     | processed_pseudogene | -      | - |

|                    |       |        |        |             |             |               |                                                                    |                                  |           |   |
|--------------------|-------|--------|--------|-------------|-------------|---------------|--------------------------------------------------------------------|----------------------------------|-----------|---|
| ENSMUSG00000091625 | 10.99 | 0.117  | -3.093 | 5.03498E-05 | 0.000374787 | Lsm5          | LSM5 homolog, U6 small nuclear RNA and mRNA degradation associated | protein_coding                   | 66373     | - |
| ENSMUSG00000091649 | 42.19 | 0.164  | -2.611 | 1.04763E-08 | 3.58568E-07 | Phf11b        | PHD finger protein 11B                                             | protein_coding                   | 236451    | - |
| ENSMUSG00000091655 | 7.65  | 0.187  | -2.417 | 0.00118646  | 0.004849748 | Gm8741        | -                                                                  | processed_pseudogene             | -         | - |
| ENSMUSG00000091722 | 14.57 | 4.418  | 2.144  | 0.000230498 | 0.001282299 | Siah3         | siah E3 ubiquitin protein ligase family member 3                   | protein_coding                   | 380918    | - |
| ENSMUSG00000091780 | 7.43  | 0.069  | -3.866 | 7.92031E-05 | 0.000540212 | Sco2          | SCO2 cytochrome c oxidase assembly protein                         | protein_coding                   | 100126824 | - |
| ENSMUSG00000091849 | 43.15 | 4.297  | 2.103  | 1.53191E-06 | 2.15391E-05 | Gm17188       | -                                                                  | processed_transcript             | -         | - |
| ENSMUSG00000091955 | 133.4 | 0.191  | -2.385 | 1.19641E-12 | 1.67955E-10 | Gm9844        | -                                                                  | protein_coding                   | -         | - |
| ENSMUSG00000091971 | 50.08 | 11.508 | 3.525  | 5.64619E-10 | 3.11216E-08 | Hspa1a        | heat shock protein 1A                                              | protein_coding                   | 193740    | - |
| ENSMUSG00000092008 | 4.58  | 12.617 | 3.657  | 0.001664278 | 0.006394144 | Cyp2c69       | cytochrome P450, family 2, subfamily c, polypeptide 69             | protein_coding                   | 100043108 | - |
| ENSMUSG00000092035 | 46.05 | 5.21   | 2.381  | 7.35996E-08 | 1.73103E-06 | Peg10         | paternally expressed 10                                            | protein_coding                   | 170676    | - |
| ENSMUSG00000092083 | 27.49 | 5.092  | 2.348  | 3.07308E-07 | 5.73628E-06 | Kcnb2         | potassium voltage gated channel, Shab-related subfamily, member 2  | protein_coding                   | 98741     | - |
| ENSMUSG00000092086 | 5.42  | 0.205  | -2.288 | 0.016320444 | 0.039932196 | Gm6793        | heterogeneous nuclear ribonucleoprotein A3 pseudogene              | protein_coding                   | 627828    | - |
| ENSMUSG00000092247 | 5.56  | 5.156  | 2.366  | 0.002428367 | 0.008667331 | Gm20426       | -                                                                  | transcribed_processed_pseudogene | -         | - |
| ENSMUSG00000092457 | 6.58  | 0.127  | -2.981 | 0.000722357 | 0.003230471 | Gm8835        | -                                                                  | unprocessed_pseudogene           | -         | - |
| ENSMUSG00000092463 | 120.2 | 0.145  | -2.785 | 2.12181E-13 | 3.70163E-11 | Gm20489       | -                                                                  | protein_coding                   | -         | - |
| ENSMUSG00000092586 | 92.93 | 6.192  | 2.63   | 2.21523E-09 | 1.01804E-07 | Ly6g6c        | lymphocyte antigen 6 complex, locus G6C                            | protein_coding                   | 68468     | - |
| ENSMUSG00000092593 | 12.01 | 4.425  | 2.146  | 0.001080297 | 0.004490367 | Gm20492       | predicted gene 20492                                               | processed_transcript             | 102632786 | - |
| ENSMUSG00000092609 | 50.08 | 11.508 | 3.525  | 5.64574E-10 | 3.11216E-08 | Gm20481       | -                                                                  | protein_coding                   | -         | - |
| ENSMUSG00000092622 | 10.41 | 4.243  | 2.085  | 0.00196424  | 0.007303006 | Khdc3         | KH domain containing 3, subcortical maternal complex member        | protein_coding                   | 66991     | - |
| ENSMUSG00000092627 | 11.51 | 6.499  | 2.7    | 5.08366E-05 | 0.000377097 | D130058E05Rik | -                                                                  | processed_transcript             | -         | - |
| ENSMUSG00000092737 | 11.89 | 0.086  | -3.54  | 0.000175018 | 0.001023061 | Gm24022       | -                                                                  | miRNA                            | -         | - |
| ENSMUSG00000092748 | 8.1   | 0.132  | -2.919 | 0.000742487 | 0.003299968 | Gm22175       | -                                                                  | miRNA                            | -         | - |
| ENSMUSG00000093185 | 11.47 | 0.117  | -3.09  | 0.000100418 | 0.000655916 | Gm25692       | -                                                                  | miRNA                            | -         | - |

|                    |        |       |        |             |             |               |                                                  |                      |           |   |
|--------------------|--------|-------|--------|-------------|-------------|---------------|--------------------------------------------------|----------------------|-----------|---|
| ENSMUSG00000093327 | 228.6  | 0.022 | -5.484 | 4.37652E-35 | 1.31069E-31 | Mir5107       | microRNA 5107                                    | miRNA                | 100628611 | - |
| ENSMUSG00000093400 | 8.81   | 5.675 | 2.505  | 0.001341422 | 0.005361138 | Gm20647       | -                                                | antisense_RNA        | -         | - |
| ENSMUSG00000093436 | 18.99  | 8.149 | 3.027  | 7.92632E-06 | 8.27323E-05 | Gm20646       | -                                                | sense_overlapping    | -         | - |
| ENSMUSG00000093472 | 7.64   | 4.567 | 2.191  | 0.000810014 | 0.003554367 | 4930438E09Rik | RIKEN cDNA 4930438E09 gene                       | antisense_RNA        | 73977     | - |
| ENSMUSG00000093497 | 5.35   | 6.158 | 2.623  | 0.001807217 | 0.006826547 | Gm20713       | -                                                | processed_transcript | -         | - |
| ENSMUSG00000093553 | 524.89 | 4.069 | 2.025  | 3.18216E-06 | 3.92721E-05 | Gm20633       | -                                                | antisense_RNA        | -         | - |
| ENSMUSG00000093594 | 12.16  | 0.23  | -2.117 | 0.002150658 | 0.007873914 | Gm20707       | -                                                | lincRNA              | -         | - |
| ENSMUSG00000093650 | 13.87  | 6.39  | 2.676  | 8.54145E-06 | 8.83091E-05 | Gm20631       | -                                                | antisense_RNA        | -         | - |
| ENSMUSG00000093656 | 29     | 4.37  | 2.128  | 5.68577E-08 | 1.40727E-06 | Gm20628       | -                                                | antisense_RNA        | -         | - |
| ENSMUSG00000093662 | 14.71  | 5.286 | 2.402  | 0.000165921 | 0.000981381 | Gm20649       | -                                                | lincRNA              | -         | - |
| ENSMUSG00000093675 | 8.28   | 4.789 | 2.26   | 0.014317723 | 0.035887176 | Gm20618       | -                                                | lincRNA              | -         | - |
| ENSMUSG00000093686 | 24.77  | 0.244 | -2.036 | 4.83756E-05 | 0.000364255 | Gm4705        | -                                                | processed_pseudogene | -         | - |
| ENSMUSG00000093695 | 10.62  | 4.938 | 2.304  | 0.001323326 | 0.005303041 | Gm20717       | -                                                | processed_transcript | -         | - |
| ENSMUSG00000093861 | 20.41  | 0.003 | -8.33  | 1.35062E-14 | 3.32456E-12 | Igkv1-110     | -                                                | IG_V_gene            | -         | - |
| ENSMUSG00000093930 | 12.52  | 0.079 | -3.658 | 7.47006E-07 | 1.18892E-05 | Hmgcs1        | 3-hydroxy-3-methylglutaryl-Coenzyme A synthase 1 | protein_coding       | 208715    | - |
| ENSMUSG00000093955 | 4.41   | 0.134 | -2.896 | 0.007665795 | 0.021916696 | Ighv1-34      | -                                                | IG_V_gene            | -         | - |
| ENSMUSG00000093973 | 19.44  | 5.257 | 2.394  | 0.00018416  | 0.001067818 | Mrgpra2a      | MAS-related GPR, member A2A                      | protein_coding       | 668727    | - |
| ENSMUSG00000093989 | 244.89 | 4.096 | 2.034  | 2.72078E-09 | 1.21315E-07 | Rnasek        | ribonuclease, RNase K                            | protein_coding       | 52898     | - |
| ENSMUSG00000094006 | 15.86  | 0.119 | -3.076 | 3.411E-05   | 0.000274607 | Igkv4-59      | -                                                | IG_V_gene            | -         | - |
| ENSMUSG00000094083 | 6.96   | 4.192 | 2.068  | 0.008208976 | 0.023131112 | Gm1604a       | predicted gene 1604b                             | protein_coding       | 381059    | - |
| ENSMUSG00000094094 | 5.99   | 0.143 | -2.807 | 0.002054572 | 0.007582379 | Igkv5-45      | -                                                | IG_V_gene            | -         | - |
| ENSMUSG00000094117 | 11.14  | 0.211 | -2.245 | 0.008161635 | 0.023030217 | Igkv3-12      | -                                                | IG_V_gene            | -         | - |
| ENSMUSG00000094230 | 11.29  | 4.433 | 2.148  | 0.000112839 | 0.000719358 | Gm21847       | -                                                | antisense_RNA        | -         | - |
| ENSMUSG00000094242 | 56.86  | 5.217 | 2.383  | 4.47677E-07 | 7.89432E-06 | Gm5456        | -                                                | processed_pseudogene | -         | - |

|                    |        |       |        |             |             |               |                                   |  |                      |        |   |
|--------------------|--------|-------|--------|-------------|-------------|---------------|-----------------------------------|--|----------------------|--------|---|
| ENSMUSG00000094315 | 2.19   | 0.03  | -5.07  | 0.002133441 | 0.00782072  | Igkv4-78      | -                                 |  | IG_V_gene            | -      | - |
| ENSMUSG00000094335 | 22.47  | 0.024 | -5.4   | 3.07925E-14 | 6.83099E-12 | Igkv1-117     | -                                 |  | IG_V_gene            | -      | - |
| ENSMUSG00000094356 | 4.84   | 0.013 | -6.28  | 2.5833E-06  | 3.30152E-05 | Igkv8-28      | -                                 |  | IG_V_gene            | -      | - |
| ENSMUSG00000094370 | 67.56  | 5.682 | 2.506  | 1.04332E-06 | 1.56228E-05 | Gm3373        | -                                 |  | protein_coding       | -      | - |
| ENSMUSG00000094420 | 22.61  | 0.093 | -3.42  | 3.51828E-07 | 6.42479E-06 | Igkv10-96     | -                                 |  | IG_V_gene            | -      | - |
| ENSMUSG00000094433 | 14.46  | 0.174 | -2.519 | 0.000234439 | 0.001298591 | Igkv5-43      | -                                 |  | IG_V_gene            | -      | - |
| ENSMUSG00000094491 | 3.53   | 0.018 | -5.791 | 0.000128637 | 0.000800926 | Igkv1-133     | -                                 |  | IG_V_gene            | -      | - |
| ENSMUSG00000094509 | 5.07   | 0.177 | -2.497 | 0.01174497  | 0.030809284 | Ighv14-1      | -                                 |  | IG_V_gene            | -      | - |
| ENSMUSG00000094525 | 8.83   | 0.215 | -2.215 | 0.001378751 | 0.005478719 | Trbv12-2      | -                                 |  | TR_V_gene            | -      | - |
| ENSMUSG00000094546 | 6.12   | 0.095 | -3.393 | 0.000764298 | 0.003377797 | Ighv1-26      | -                                 |  | IG_V_gene            | -      | - |
| ENSMUSG00000094561 | 4.02   | 0.154 | -2.697 | 0.018193848 | 0.04373582  | Ighv1-22      | -                                 |  | IG_V_gene            | -      | - |
| ENSMUSG00000094568 | 7.41   | 0.147 | -2.761 | 0.00045758  | 0.002237183 | Smarce1-ps1   | -                                 |  | processed_pseudogene | -      | - |
| ENSMUSG00000094619 | 2.48   | 0.026 | -5.266 | 0.000962189 | 0.004087368 | Trav14d-3-dv8 | -                                 |  | TR_V_gene            | -      | - |
| ENSMUSG00000094737 | 74.56  | 5.563 | 2.476  | 5.57735E-08 | 1.38425E-06 | Gm17045       | -                                 |  | processed_pseudogene | -      | - |
| ENSMUSG00000094796 | 55.97  | 0.157 | -2.673 | 1.45921E-10 | 9.71134E-09 | BC147527      | cDNA sequence BC147527            |  | protein_coding       | 625360 | - |
| ENSMUSG00000094797 | 21.6   | 0.096 | -3.38  | 2.69701E-07 | 5.14071E-06 | Igkv6-15      | -                                 |  | IG_V_gene            | -      | - |
| ENSMUSG00000094814 | 4.08   | 6.019 | 2.59   | 0.005480645 | 0.01674005  | Gm21973       | -                                 |  | protein_coding       | -      | - |
| ENSMUSG00000094872 | 6.21   | 0.047 | -4.412 | 2.56632E-05 | 0.00021752  | Igkv9-120     | -                                 |  | IG_V_gene            | -      | - |
| ENSMUSG00000094902 | 2.58   | 0.024 | -5.353 | 0.000518731 | 0.002471564 | Igkv10-95     | -                                 |  | IG_V_gene            | -      | - |
| ENSMUSG00000094930 | 13.21  | 0.078 | -3.688 | 3.96455E-08 | 1.04763E-06 | Igkv6-25      | -                                 |  | IG_V_gene            | -      | - |
| ENSMUSG00000095007 | 10.77  | 0.028 | -5.16  | 1.11675E-07 | 2.43825E-06 | Igkv12-41     | -                                 |  | IG_V_gene            | -      | - |
| ENSMUSG00000095041 | 73.68  | 0.219 | -2.191 | 2.09662E-07 | 4.15504E-06 | AC149090.1    | -                                 |  | protein_coding       | -      | - |
| ENSMUSG00000095079 | 230.46 | 0.199 | -2.329 | 0.001928795 | 0.007201974 | Igha          | -                                 |  | IG_C_gene            | -      | - |
| ENSMUSG00000095098 | 20.02  | 0.214 | -2.227 | 6.5038E-05  | 0.000459744 | Ccdc85b       | coiled-coil domain containing 85B |  | protein_coding       | 240514 | - |

|                    |        |        |        |             |             |                |                            |                        |           |          |
|--------------------|--------|--------|--------|-------------|-------------|----------------|----------------------------|------------------------|-----------|----------|
| ENSMUSG00000095217 | 140.4  | 4.275  | 2.096  | 7.9263E-08  | 1.84015E-06 | Hist1h2bn      | histone cluster 1, H2bn    | protein_coding         | 319187    | -        |
| ENSMUSG00000095335 | 6.57   | 0.009  | -6.757 | 2.54229E-06 | 3.2607E-05  | Igkv3-5        | -                          | IG_V_gene              | -         | -        |
| ENSMUSG00000095351 | 5.63   | 0.011  | -6.534 | 2.09107E-06 | 2.78123E-05 | Igkv3-2        | -                          | IG_V_gene              | -         | -        |
| ENSMUSG00000095403 | 100.13 | 0.18   | -2.472 | 2.36712E-11 | 2.10568E-09 | Gm21092        | -                          | unprocessed_pseudogene | -         | -        |
| ENSMUSG00000095407 | 4.71   | 4.996  | 2.321  | 0.005357476 | 0.016430873 | Tmem200c       | transmembrane protein 200C | protein_coding         | 622645    | -        |
| ENSMUSG00000095478 | 8.05   | 0.067  | -3.905 | 8.09696E-05 | 0.000549657 | Gm9824         | -                          | processed_pseudogene   | -         | -        |
| ENSMUSG00000095493 | 6.55   | 5.637  | 2.495  | 0.001131305 | 0.004668905 | A630023A22 Rik | RIKEN cDNA A630023A22 gene | protein_coding         | 105518    | -        |
| ENSMUSG00000095497 | 3.05   | 0.021  | -5.592 | 0.000169874 | 0.001000806 | Igkv1-122      | -                          | IG_V_gene              | -         | -        |
| ENSMUSG00000095512 | 39.61  | 6.218  | 2.636  | 7.43305E-07 | 1.18619E-05 | Gm17222        | -                          | processed_pseudogene   | -         | -        |
| ENSMUSG00000095562 | 143.88 | 0.24   | -2.056 | 1.01674E-06 | 1.53141E-05 | Gm21887        | -                          | protein_coding         | -         | -        |
| ENSMUSG00000095583 | 5.3    | 0.223  | -2.163 | 0.020430659 | 0.04783303  | Ighv14-2       | -                          | IG_V_gene              | -         | -        |
| ENSMUSG00000095612 | 6.28   | 0.139  | -2.849 | 0.007166799 | 0.020747576 | Ighv5-4        | -                          | IG_V_gene              | -         | -        |
| ENSMUSG00000095630 | 12.73  | 0.195  | -2.358 | 0.000354311 | 0.001809724 | Igkv6-23       | -                          | IG_V_gene              | -         | -        |
| ENSMUSG00000095633 | 3.47   | 0.017  | -5.843 | 2.13716E-05 | 0.000187568 | Igkv4-58       | -                          | IG_V_gene              | -         | -        |
| ENSMUSG00000095642 | 4.73   | 0.119  | -3.074 | 0.000985097 | 0.004168916 | Ighv14-3       | -                          | IG_V_gene              | -         | -        |
| ENSMUSG00000095672 | 4.06   | 0.136  | -2.879 | 0.002578859 | 0.009086179 | AC133103.5     | -                          | protein_coding         | -         | -        |
| ENSMUSG00000095753 | 3.95   | 0.016  | -5.994 | 1.69698E-05 | 0.000155181 | Igkv4-53       | -                          | IG_V_gene              | -         | -        |
| ENSMUSG00000095771 | 10.02  | 0.006  | -7.31  | 3.0331E-09  | 1.31965E-07 | Igkv14-111     | -                          | IG_V_gene              | -         | -        |
| ENSMUSG00000095794 | 17.65  | 0.016  | -5.94  | 2.97912E-14 | 6.77617E-12 | Igkv6-17       | -                          | IG_V_gene              | -         | -        |
| ENSMUSG00000095991 | 117.44 | 4.9    | 2.293  | 1.08754E-07 | 2.39486E-06 | Gm17048        | -                          | processed_pseudogene   | -         | -        |
| ENSMUSG00000096003 | 62.7   | 5.96   | 2.575  | 1.02718E-06 | 1.54584E-05 | Gm3500         | predicted gene 3500        | protein_coding         | 100041678 | -        |
| ENSMUSG00000096039 | 39.72  | 6.077  | 2.603  | 9.0292E-07  | 1.39386E-05 | D830030K20 Rik | RIKEN cDNA D830030K20 gene | protein_coding         | 320333    | -        |
| ENSMUSG00000096225 | 9.26   | 23.196 | 4.536  | 7.13455E-10 | 3.80418E-08 | Lhx8           | LIM homeobox protein 8     | protein_coding         | 16875     | Homeobox |
| ENSMUSG00000096336 | 12.09  | 0.005  | -7.616 | 6.89903E-12 | 7.33542E-10 | Igkv1-135      | -                          | IG_V_gene              | -         | -        |



|                    |        |       |        |             |             |               |                             |                        |           |         |
|--------------------|--------|-------|--------|-------------|-------------|---------------|-----------------------------|------------------------|-----------|---------|
| ENSMUSG00000096401 | 103.74 | 0.167 | -2.585 | 6.78756E-12 | 7.25986E-10 | Gm21811       | -                           | unprocessed_pseudogene | -         | -       |
| ENSMUSG00000096474 | 9.77   | 0.054 | -4.213 | 1.63742E-05 | 0.000150577 | Gm5561        | -                           | processed_pseudogene   | -         | -       |
| ENSMUSG00000096490 | 9.36   | 0.032 | -4.969 | 3.46716E-07 | 6.35081E-06 | Igkv10-94     | -                           | IG_V_gene              | -         | -       |
| ENSMUSG00000096544 | 59.73  | 0.202 | -2.306 | 9.91742E-11 | 7.15467E-09 | Gm4617        | -                           | processed_pseudogene   | -         | -       |
| ENSMUSG00000096579 | 49.72  | 5.456 | 2.448  | 1.48191E-07 | 3.11079E-06 | Gm17121       | -                           | processed_pseudogene   | -         | -       |
| ENSMUSG00000096594 | 6.71   | 0.2   | -2.32  | 0.003651483 | 0.012056871 | Igkv8-19      | -                           | IG_V_gene              | -         | -       |
| ENSMUSG00000096629 | 79.37  | 4.19  | 2.067  | 5.06253E-06 | 5.75387E-05 | Gm3383        | predicted gene 3383         | protein_coding         | 100041515 | -       |
| ENSMUSG00000096632 | 4.05   | 0.015 | -6.042 | 3.83035E-05 | 0.000300295 | Igkv9-124     | -                           | IG_V_gene              | -         | -       |
| ENSMUSG00000096715 | 13.02  | 0.022 | -5.494 | 1.42593E-09 | 7.03917E-08 | Igkv3-4       | -                           | IG_V_gene              | -         | -       |
| ENSMUSG00000096719 | 33.07  | 5.88  | 2.556  | 1.45197E-08 | 4.62596E-07 | Mrgpra2b      | MAS-related GPR, member A2B | protein_coding         | 235712    | -       |
| ENSMUSG00000096844 | 5.66   | 0.151 | -2.725 | 0.001797355 | 0.006792149 | Igkv6-14      | -                           | IG_V_gene              | -         | -       |
| ENSMUSG00000096856 | 8.54   | 0.165 | -2.602 | 0.002380071 | 0.008543246 | Gm10778       | predicted gene 10778        | protein_coding         | 100233208 | zf-C2H2 |
| ENSMUSG00000096887 | 33.38  | 4.279 | 2.097  | 7.87611E-07 | 1.24037E-05 | Gm20594       | predicted gene, 20594       | protein_coding         | 100463512 | -       |
| ENSMUSG00000096918 | 7.72   | 4.494 | 2.168  | 0.018588801 | 0.044474985 | Gm16863       | predicted gene, 16863       | lincRNA                | 328646    | -       |
| ENSMUSG00000097003 | 6.41   | 5.443 | 2.444  | 0.004746743 | 0.014893352 | D930007P13Rik | Riken cDNA D930007P13 gene  | lincRNA                | 432989    | -       |
| ENSMUSG00000097009 | 34.62  | 4.008 | 2.003  | 4.00328E-06 | 4.7576E-05  | Gm26861       | -                           | antisense_RNA          | -         | -       |
| ENSMUSG00000097020 | 17.65  | 0.233 | -2.101 | 2.57315E-05 | 0.000217893 | Gm26613       | -                           | lincRNA                | -         | -       |
| ENSMUSG00000097039 | 114.95 | 5.04  | 2.334  | 3.55024E-09 | 1.48062E-07 | Pvt1          | Pvt1 oncogene               | lincRNA                | 19296     | -       |
| ENSMUSG00000097042 | 11.87  | 0.133 | -2.911 | 2.45759E-05 | 0.00020939  | Gm17491       | -                           | sense_intronic         | -         | -       |
| ENSMUSG00000097057 | 37.65  | 0.202 | -2.307 | 4.3019E-08  | 1.10905E-06 | Gm17638       | -                           | lincRNA                | -         | -       |
| ENSMUSG00000097091 | 180.16 | 0.036 | -4.799 | 8.51466E-30 | 1.9125E-26  | 4930526L06Rik | RIKEN cDNA 4930526L06 gene  | antisense_RNA          | 75138     | -       |
| ENSMUSG00000097138 | 11.26  | 5.41  | 2.436  | 0.000723942 | 0.003235947 | Gm26625       | -                           | lincRNA                | -         | -       |
| ENSMUSG00000097139 | 14.84  | 4.035 | 2.012  | 0.000104249 | 0.000676753 | Gm26626       | -                           | antisense_RNA          | -         | -       |
| ENSMUSG00000097140 | 7.29   | 0.179 | -2.482 | 0.000891614 | 0.003840223 | Gm26779       | -                           | lincRNA                | -         | -       |

|                    |         |        |        |             |             |               |                            |                                    |           |   |
|--------------------|---------|--------|--------|-------------|-------------|---------------|----------------------------|------------------------------------|-----------|---|
| ENSMUSG00000097145 | 14.54   | 4.824  | 2.27   | 9.06161E-05 | 0.000602175 | 9230114K14Rik | RIKEN cDNA 9230114K14 gene | processed_transcript               | 414108    | - |
| ENSMUSG00000097164 | 15.17   | 0.244  | -2.037 | 0.000822663 | 0.003599324 | Cep83os       | -                          | bidirectional_promoter_lincRNA     | -         | - |
| ENSMUSG00000097176 | 16.49   | 0.185  | -2.436 | 4.19452E-05 | 0.00032376  | Gm26830       | -                          | lincRNA                            | -         | - |
| ENSMUSG00000097241 | 9.13    | 4.924  | 2.3    | 0.000531616 | 0.002518482 | Gm26907       | -                          | antisense_RNA                      | -         | - |
| ENSMUSG00000097248 | 9.8     | 4.72   | 2.239  | 0.001480352 | 0.005811765 | Gm2694        | predicted gene 2694        | lincRNA                            | 100040294 | - |
| ENSMUSG00000097250 | 6.99    | 4.311  | 2.108  | 0.01369128  | 0.034684706 | Gm26771       | -                          | antisense_RNA                      | -         | - |
| ENSMUSG00000097252 | 1806.94 | 5.491  | 2.457  | 7.68686E-07 | 1.21482E-05 | Gm6634        | predicted gene 6634        | lincRNA                            | 625901    | - |
| ENSMUSG00000097305 | 6.52    | 5.754  | 2.525  | 0.000271008 | 0.001453655 | Gm17276       | -                          | lincRNA                            | -         | - |
| ENSMUSG00000097311 | 8.67    | 4.372  | 2.128  | 0.005305988 | 0.016303572 | Gm26871       | -                          | processed_transcript               | -         | - |
| ENSMUSG00000097325 | 6.27    | 7.228  | 2.854  | 0.00036758  | 0.00186215  | Gm16897       | predicted gene, 16897      | antisense_RNA                      | 320400    | - |
| ENSMUSG00000097346 | 372.81  | 0.095  | -3.389 | 1.11832E-12 | 1.63375E-10 | Gm26619       | -                          | lincRNA                            | -         | - |
| ENSMUSG00000097352 | 12      | 0.135  | -2.886 | 2.75794E-05 | 0.000230822 | C920009B18Rik | RIKEN cDNA C920009B18 gene | transcribed_unprocessed_pseudogene | 606736    | - |
| ENSMUSG00000097353 | 10.12   | 0.227  | -2.139 | 0.001167792 | 0.004791974 | A430046D13Rik | Riken cDNA A430046D13 gene | lincRNA                            | 654440    | - |
| ENSMUSG00000097383 | 21.33   | 4.56   | 2.189  | 0.000124362 | 0.000777812 | 1500026H17Rik | RIKEN cDNA 1500026H17 gene | bidirectional_promoter_lincRNA     | 69002     | - |
| ENSMUSG00000097384 | 199.32  | 45.633 | 5.512  | 3.56855E-05 | 0.000284866 | Gm26815       | -                          | lincRNA                            | -         | - |
| ENSMUSG00000097407 | 16.2    | 0.173  | -2.532 | 0.00086724  | 0.003750527 | 4933408J17Rik | RIKEN cDNA 4933408J17 gene | lincRNA                            | 74454     | - |
| ENSMUSG00000097412 | 78.94   | 0.214  | -2.222 | 1.12263E-08 | 3.76354E-07 | 1810014B01Rik | RIKEN cDNA 1810014B01 gene | transcribed_unprocessed_pseudogene | 66263     | - |
| ENSMUSG00000097458 | 8.21    | 5.757  | 2.525  | 0.000410961 | 0.002044199 | Gm26697       | -                          | lincRNA                            | -         | - |
| ENSMUSG00000097517 | 7.28    | 0.143  | -2.803 | 0.000558071 | 0.002617586 | Gm26695       | -                          | lincRNA                            | -         | - |
| ENSMUSG00000097520 | 9.45    | 4.965  | 2.312  | 0.002325628 | 0.00838804  | 4930488L21Rik | -                          | antisense_RNA                      | -         | - |
| ENSMUSG00000097623 | 9.51    | 4.631  | 2.211  | 0.001387017 | 0.005505479 | B230323A14Rik | RIKEN cDNA B230323A14 gene | antisense_RNA                      | 319970    | - |
| ENSMUSG00000097648 | 6.23    | 8.549  | 3.096  | 0.000986537 | 0.004174026 | 9330185C12Rik | -                          | lincRNA                            | -         | - |
| ENSMUSG00000097675 | 46.27   | 4.529  | 2.179  | 1.2006E-07  | 2.59923E-06 | 1700101I11Rik | RIKEN cDNA 1700101I11 gene | processed_transcript               | 100504641 | - |

|                    |        |        |        |             |             |               |                                                                    |  |                                    |           |   |
|--------------------|--------|--------|--------|-------------|-------------|---------------|--------------------------------------------------------------------|--|------------------------------------|-----------|---|
| ENSMUSG00000097718 | 4.71   | 0.246  | -2.024 | 0.014900799 | 0.037131113 | Gm26896       | -                                                                  |  | lincRNA                            | -         | - |
| ENSMUSG00000097722 | 15.22  | 0.245  | -2.031 | 0.000159261 | 0.000948857 | Gm26841       | -                                                                  |  | lincRNA                            | -         | - |
| ENSMUSG00000097727 | 9.53   | 9.386  | 3.23   | 3.49911E-05 | 0.000280819 | F630040K05Rik | RIKEN cDNA F630040K05 gene                                         |  | lincRNA                            | 433111    | - |
| ENSMUSG00000097739 | 7.54   | 5.36   | 2.422  | 0.017750332 | 0.042835846 | Gm2539        | -                                                                  |  | transcribed_unprocessed_pseudogene | -         | - |
| ENSMUSG00000097763 | 15.58  | 0.226  | -2.147 | 0.000925593 | 0.003953408 | Gm26636       | -                                                                  |  | antisense_RNA                      | -         | - |
| ENSMUSG00000097770 | 10.57  | 4.485  | 2.165  | 0.000178959 | 0.001042032 | Gm26776       | -                                                                  |  | lincRNA                            | -         | - |
| ENSMUSG00000097772 | 7.83   | 0.2    | -2.322 | 0.00999999  | 0.027106626 | 5430416N02Rik | RIKEN cDNA 5430416N02 gene                                         |  | lincRNA                            | 100503199 | - |
| ENSMUSG00000097797 | 4.9    | 4.876  | 2.286  | 0.00827027  | 0.023274626 | Gm26901       | -                                                                  |  | lincRNA                            | -         | - |
| ENSMUSG00000097804 | 6.37   | 4.182  | 2.064  | 0.010284941 | 0.027736772 | Gm16685       | -                                                                  |  | antisense_RNA                      | -         | - |
| ENSMUSG00000097836 | 14.17  | 4.575  | 2.194  | 0.000181597 | 0.001056026 | Gm26903       | -                                                                  |  | antisense_RNA                      | -         | - |
| ENSMUSG00000097855 | 188.79 | 34.229 | 5.097  | 2.09804E-06 | 2.78844E-05 | A930007I19Rik | RIKEN cDNA A930007I19 gene                                         |  | lincRNA                            | 77779     | - |
| ENSMUSG00000097864 | 4.26   | 0.135  | -2.889 | 0.002695472 | 0.009420345 | Gm26856       | -                                                                  |  | lincRNA                            | -         | - |
| ENSMUSG00000097881 | 8.95   | 11.277 | 3.495  | 3.38119E-06 | 4.12749E-05 | Celr          | cerebellum expressed regulatory RNA                                |  | lincRNA                            | 98452     | - |
| ENSMUSG00000098107 | 25.11  | 5.109  | 2.353  | 3.73582E-06 | 4.5053E-05  | Gm27007       | -                                                                  |  | lincRNA                            | -         | - |
| ENSMUSG00000098120 | 35.84  | 0.161  | -2.635 | 3.18313E-09 | 1.36084E-07 | Gm5914        | predicted gene 5914                                                |  | lincRNA                            | 546100    | - |
| ENSMUSG00000098129 | 7.63   | 7.643  | 2.934  | 2.9196E-05  | 0.000241428 | Gm27040       | -                                                                  |  | antisense_RNA                      | -         | - |
| ENSMUSG00000098132 | 6.12   | 5.698  | 2.51   | 0.001065736 | 0.004443204 | Rassf10       | Ras association (RalGDS/AF-6) domain family (N-terminal) member 10 |  | protein_coding                     | 78748     | - |
| ENSMUSG00000098134 | 13.16  | 0.239  | -2.064 | 0.001517466 | 0.005931554 | Rnf113a2      | ring finger protein 113A2                                          |  | protein_coding                     | 66381     | - |
| ENSMUSG00000098144 | 28.99  | 4.735  | 2.243  | 5.18149E-08 | 1.29494E-06 | 1700029N11Rik | RIKEN cDNA 1700029N11 gene                                         |  | lincRNA                            | 69491     | - |
| ENSMUSG00000098178 | 197.02 | 0.143  | -2.805 | 2.48175E-11 | 2.18601E-09 | Gm42418       | -                                                                  |  | lincRNA                            | -         | - |
| ENSMUSG00000098197 | 63.97  | 0.077  | -3.691 | 2.75269E-12 | 3.3421E-10  | BC051537      | cDNA sequence BC051537                                             |  | antisense_RNA                      | 414076    | - |
| ENSMUSG00000098243 | 8.79   | 5.045  | 2.335  | 0.003983699 | 0.012932807 | Gm4258        | -                                                                  |  | processed_transcript               | -         | - |
| ENSMUSG00000098257 | 12.88  | 5.9    | 2.561  | 0.00061712  | 0.002844801 | Gm27169       | -                                                                  |  | lincRNA                            | -         | - |

|                    |       |       |        |             |             |               |                            |                                |           |   |
|--------------------|-------|-------|--------|-------------|-------------|---------------|----------------------------|--------------------------------|-----------|---|
| ENSMUSG00000098269 | 13.71 | 0.156 | -2.677 | 2.76557E-05 | 0.000231245 | Mir8094       | microRNA 8094              | miRNA                          | 102465886 | - |
| ENSMUSG00000098359 | 3.02  | 0.101 | -3.305 | 0.002406114 | 0.008611109 | Mir7649       | microRNA 7649              | miRNA                          | 102465757 | - |
| ENSMUSG00000098537 | 20.2  | 5.564 | 2.476  | 8.97152E-06 | 9.15441E-05 | Gm27867       | -                          | misc_RNA                       | -         | - |
| ENSMUSG00000098566 | 39.52 | 5.03  | 2.331  | 8.73226E-07 | 1.35267E-05 | Gm27761       | -                          | misc_RNA                       | -         | - |
| ENSMUSG00000098627 | 7.4   | 4.071 | 2.025  | 0.01622469  | 0.039746619 | 4930524O08Rik | RIKEN cDNA 4930524O08 gene | lincRNA                        | 74700     | - |
| ENSMUSG00000098715 | 223.2 | 0.207 | -2.271 | 1.19936E-11 | 1.17212E-09 | Gm28053       | -                          | protein_coding                 | -         | - |
| ENSMUSG00000098739 | 73.43 | 0.178 | -2.491 | 2.41512E-10 | 1.48114E-08 | Gm27151       | -                          | antisense_RNA                  | -         | - |
| ENSMUSG00000098749 | 8.69  | 5.56  | 2.475  | 0.001390006 | 0.005515823 | Gm27477       | -                          | misc_RNA                       | -         | - |
| ENSMUSG00000098760 | 18.51 | 4.888 | 2.289  | 3.01852E-05 | 0.000247332 | Gm2164        | -                          | antisense_RNA                  | -         | - |
| ENSMUSG00000098814 | 17.7  | 0.122 | -3.033 | 2.39328E-05 | 0.000205274 | Igkv19-93     | -                          | IG_V_gene                      | -         | - |
| ENSMUSG00000098889 | 7.01  | 0.234 | -2.097 | 0.005511733 | 0.016820708 | Gm27206       | -                          | antisense_RNA                  | -         | - |
| ENSMUSG00000098914 | 7.29  | 4.222 | 2.078  | 0.009771162 | 0.026622898 | Gm27747       | -                          | misc_RNA                       | -         | - |
| ENSMUSG00000098915 | 40.55 | 0.152 | -2.722 | 1.44273E-09 | 7.10256E-08 | Rpl15-ps2     | -                          | processed_pseudogene           | -         | - |
| ENSMUSG00000099009 | 4.24  | 6.86  | 2.778  | 0.005235904 | 0.016146208 | Rdh16f1       | -                          | protein_coding                 | -         | - |
| ENSMUSG00000099061 | 11.97 | 6.084 | 2.605  | 4.11381E-05 | 0.000318979 | Gm28050       | -                          | lincRNA                        | -         | - |
| ENSMUSG00000099070 | 11.96 | 0.111 | -3.176 | 1.13885E-05 | 0.000111399 | Mir8119       | microRNA 8119              | miRNA                          | 102465997 | - |
| ENSMUSG00000099117 | 10.98 | 4.337 | 2.117  | 0.00106237  | 0.004433284 | Gm27404       | -                          | misc_RNA                       | -         | - |
| ENSMUSG00000099338 | 18.43 | 4.173 | 2.061  | 0.000744418 | 0.00330691  | 2810030D12Rik | -                          | bidirectional_promoter_lincRNA | -         | - |
| ENSMUSG00000099474 | 7.33  | 0.189 | -2.401 | 0.013840829 | 0.034958548 | 1700097N02Rik | RIKEN cDNA 1700097N02 gene | antisense_RNA                  | 67522     | - |
| ENSMUSG00000099492 | 34.25 | 0.167 | -2.581 | 1.80825E-08 | 5.53533E-07 | Gm5525        | -                          | processed_pseudogene           | -         | - |
| ENSMUSG00000099564 | 7.17  | 6.144 | 2.619  | 0.001458108 | 0.005747036 | Gm28729       | predicted gene 28729       | protein_coding                 | 102635744 | - |
| ENSMUSG00000099576 | 5.76  | 4.752 | 2.249  | 0.009914717 | 0.026937277 | Gm29040       | -                          | lincRNA                        | -         | - |
| ENSMUSG00000099632 | 10.05 | 7.194 | 2.847  | 0.000169    | 0.000996642 | 2900093K20Rik | -                          | antisense_RNA                  | -         | - |
| ENSMUSG00000099757 | 221.2 | 0.176 | -2.506 | 7.28762E-12 | 7.65797E-10 | BE692007      | -                          | processed_transcript           | -         | - |

|                    |        |       |        |             |             |               |                              |  |                      |           |   |
|--------------------|--------|-------|--------|-------------|-------------|---------------|------------------------------|--|----------------------|-----------|---|
| ENSMUSG00000099853 | 8.74   | 7.719 | 2.948  | 2.31513E-06 | 3.02329E-05 | Gm29328       | -                            |  | lincRNA              | -         | - |
| ENSMUSG00000099858 | 51.22  | 8.99  | 3.168  | 1.20019E-10 | 8.31141E-09 | Gm6652        | -                            |  | processed_pseudogene | -         | - |
| ENSMUSG00000099911 | 6.64   | 5.63  | 2.493  | 0.003366675 | 0.011286528 | 1700044C05Rik | RIKEN cDNA 1700044C05 gene   |  | lincRNA              | 73306     | - |
| ENSMUSG00000099930 | 5.4    | 8.313 | 3.055  | 3.92163E-05 | 0.000306116 | Gm2396        | uncharacterized LOC105245043 |  | processed_transcript | 105245043 | - |
| ENSMUSG00000100005 | 9.2    | 4.222 | 2.078  | 0.008042245 | 0.022764825 | B130024G19Rik | RIKEN cDNA B130024G19 gene   |  | processed_transcript | 434198    | - |
| ENSMUSG00000100113 | 6.02   | 7.537 | 2.914  | 0.000679992 | 0.003073131 | Gm28592       | -                            |  | lincRNA              | -         | - |
| ENSMUSG00000100157 | 50.51  | 6.193 | 2.631  | 0.0001387   | 0.000851484 | 2310034O05Rik | RIKEN cDNA 2310034O05 gene   |  | lincRNA              | 69571     | - |
| ENSMUSG00000100199 | 15.24  | 0.197 | -2.346 | 2.21465E-05 | 0.000192806 | Gm20324       | predicted gene, 20324        |  | antisense_RNA        | 100504637 | - |
| ENSMUSG00000100345 | 4.77   | 4.678 | 2.226  | 0.015681619 | 0.038701141 | Gm29418       | -                            |  | lincRNA              | -         | - |
| ENSMUSG00000100371 | 7.06   | 4.504 | 2.171  | 0.007686819 | 0.021955881 | Gm29669       | -                            |  | lincRNA              | -         | - |
| ENSMUSG00000100405 | 7.44   | 0.199 | -2.328 | 0.008468052 | 0.023738289 | Gm28911       | -                            |  | processed_pseudogene | -         | - |
| ENSMUSG00000100486 | 11.99  | 6.401 | 2.678  | 0.000138454 | 0.000850851 | Gm4131        | predicted gene 4131          |  | protein_coding       | 100042960 | - |
| ENSMUSG00000100580 | 23.07  | 5.058 | 2.339  | 7.8038E-08  | 1.81641E-06 | 4933436I20Rik | -                            |  | lincRNA              | -         | - |
| ENSMUSG00000100583 | 7.58   | 6.172 | 2.626  | 0.009282166 | 0.025542302 | Gm29443       | predicted gene 29443         |  | antisense_RNA        | 102634559 | - |
| ENSMUSG00000100600 | 10.01  | 4.664 | 2.222  | 0.000862233 | 0.003737869 | A230077H06Rik | RIKEN cDNA A230077H06 gene   |  | antisense_RNA        | 320210    | - |
| ENSMUSG00000100632 | 11.66  | 0.087 | -3.522 | 1.1825E-06  | 1.73598E-05 | 9430060I03Rik | RIKEN cDNA 9430060I03 gene   |  | antisense_RNA        | 100037260 | - |
| ENSMUSG00000100650 | 6.58   | 4.634 | 2.212  | 0.01597378  | 0.039244307 | Gm28807       | -                            |  | lincRNA              | -         | - |
| ENSMUSG00000100658 | 37.29  | 0.23  | -2.119 | 0.003057327 | 0.0104344   | F730311O21Rik | RIKEN cDNA F730311O21 gene   |  | lincRNA              | 622304    | - |
| ENSMUSG00000100755 | 169.49 | 0.227 | -2.138 | 2.50645E-10 | 1.51645E-08 | Rps23-ps1     | -                            |  | processed_pseudogene | -         | - |
| ENSMUSG00000100807 | 6.08   | 4.001 | 2      | 0.003415193 | 0.011408738 | Gm29521       | -                            |  | processed_transcript | -         | - |
| ENSMUSG00000100975 | 5.5    | 0.155 | -2.686 | 0.001861019 | 0.006994487 | Gm28875       | -                            |  | lincRNA              | -         | - |
| ENSMUSG00000101014 | 13.59  | 0.216 | -2.209 | 0.000212808 | 0.001200235 | Gm28289       | -                            |  | antisense_RNA        | -         | - |
| ENSMUSG00000101029 | 18.14  | 0.029 | -5.117 | 3.81542E-13 | 6.28984E-11 | Gm29439       | -                            |  | antisense_RNA        | -         | - |
| ENSMUSG00000101102 | 48.72  | 4.038 | 2.014  | 4.27541E-06 | 5.01651E-05 | Gm28609       | -                            |  | antisense_RNA        | -         | - |

|                    |        |       |        |             |             |               |                                                             |  |                                    |        |   |
|--------------------|--------|-------|--------|-------------|-------------|---------------|-------------------------------------------------------------|--|------------------------------------|--------|---|
| ENSMUSG00000101132 | 8.33   | 7.347 | 2.877  | 0.001076166 | 0.004477339 | Gm8000        | -                                                           |  | unprocessed_pseudogene             | -      | - |
| ENSMUSG00000101162 | 849.49 | 5.138 | 2.361  | 2.20427E-08 | 6.48258E-07 | Gm26728       | -                                                           |  | processed_transcript               | -      | - |
| ENSMUSG00000101166 | 31.8   | 0.152 | -2.715 | 1.65137E-09 | 8.0416E-08  | Gm28496       | -                                                           |  | processed_transcript               | -      | - |
| ENSMUSG00000101179 | 7.12   | 7.801 | 2.964  | 0.002788787 | 0.009674077 | Gm29455       | -                                                           |  | lincRNA                            | -      | - |
| ENSMUSG00000101298 | 58.85  | 4.514 | 2.174  | 2.07063E-07 | 4.11583E-06 | Gm28308       | -                                                           |  | protein_coding                     | -      | - |
| ENSMUSG00000101299 | 6.3    | 4.571 | 2.193  | 0.00206761  | 0.007616417 | Gm28175       | -                                                           |  | lincRNA                            | -      | - |
| ENSMUSG00000101308 | 250.96 | 5.203 | 2.379  | 2.26358E-10 | 1.40256E-08 | Gm28989       | -                                                           |  | antisense_RNA                      | -      | - |
| ENSMUSG00000101621 | 50.94  | 5.172 | 2.371  | 2.83396E-10 | 1.67511E-08 | Gm28905       | -                                                           |  | lincRNA                            | -      | - |
| ENSMUSG00000101640 | 20.85  | 4.051 | 2.018  | 0.002155508 | 0.007886851 | Gm28376       | -                                                           |  | antisense_RNA                      | -      | - |
| ENSMUSG00000101795 | 16.48  | 0.126 | -2.991 | 1.59853E-07 | 3.30161E-06 | Gm5835        | -                                                           |  | processed_pseudogene               | -      | - |
| ENSMUSG00000101840 | 27.89  | 5.324 | 2.413  | 1.8216E-05  | 0.000164733 | Gm28294       | -                                                           |  | antisense_RNA                      | -      | - |
| ENSMUSG00000101848 | 5.37   | 9.393 | 3.232  | 0.00851183  | 0.023827553 | 4933417E11Rik | RIKEN cDNA 4933417E11 gene                                  |  | lincRNA                            | 71134  | - |
| ENSMUSG00000101854 | 25.48  | 8.132 | 3.024  | 3.00761E-06 | 3.74524E-05 | 1700026F02Rik | RIKEN cDNA 1700026F02 gene                                  |  | lincRNA                            | 69419  | - |
| ENSMUSG00000101892 | 11.52  | 0.236 | -2.081 | 0.000618067 | 0.002848054 | 9130401M01Rik | RIKEN cDNA 9130401M01 gene                                  |  | protein_coding                     | 75758  | - |
| ENSMUSG00000101895 | 10.5   | 4.132 | 2.047  | 0.004616855 | 0.014531487 | Gm28981       | -                                                           |  | lincRNA                            | -      | - |
| ENSMUSG00000102106 | 13.91  | 4.44  | 2.151  | 0.009094517 | 0.025139159 | 2310043O21Rik | RIKEN cDNA 2310043O21 gene                                  |  | lincRNA                            | 69679  | - |
| ENSMUSG00000102117 | 15     | 0.067 | -3.898 | 4.23536E-08 | 1.0982E-06  | Rpsa-ps1      | -                                                           |  | processed_pseudogene               | -      | - |
| ENSMUSG00000102312 | 32.12  | 4.232 | 2.081  | 2.0188E-07  | 4.03962E-06 | Pcdha3        | protocadherin alpha 3                                       |  | protein_coding                     | 192163 | - |
| ENSMUSG00000102483 | 17.05  | 4.922 | 2.299  | 0.002252957 | 0.008171857 | Catspere1     | cation channel sperm associated auxiliary subunit epsilon 1 |  | unprocessed_pseudogene             | 631584 | - |
| ENSMUSG00000102564 | 42.05  | 4.747 | 2.247  | 0.000251689 | 0.001374648 | Gm37035       | -                                                           |  | antisense_RNA                      | -      | - |
| ENSMUSG00000102595 | 7.22   | 4.314 | 2.109  | 0.002980943 | 0.010218346 | Gm30097       | -                                                           |  | lincRNA                            | -      | - |
| ENSMUSG00000102697 | 5.76   | 7.213 | 2.851  | 0.003557811 | 0.011799612 | Pcdhac2       | protocadherin alpha subfamily C, 2                          |  | protein_coding                     | 353237 | - |
| ENSMUSG00000102802 | 9.66   | 4.71  | 2.236  | 0.001170465 | 0.004798559 | Mgam2-ps      | -                                                           |  | transcribed_unprocessed_pseudogene | -      | - |

|                    |        |       |        |             |             |               |                       |                                    |        |   |
|--------------------|--------|-------|--------|-------------|-------------|---------------|-----------------------|------------------------------------|--------|---|
| ENSMUSG00000102817 | 9.34   | 9.888 | 3.306  | 2.83341E-05 | 0.00023575  | Gm6185        | -                     | transcribed_unprocessed_pseudogene | -      | - |
| ENSMUSG00000102820 | 8.71   | 4.023 | 2.008  | 0.006456883 | 0.019104846 | Gm38353       | -                     | lincRNA                            | -      | - |
| ENSMUSG00000102824 | 3.05   | 0.194 | -2.365 | 0.021281637 | 0.049477259 | Pdcd5-ps      | -                     | processed_pseudogene               | -      | - |
| ENSMUSG00000102886 | 15.08  | 5.007 | 2.324  | 0.000107427 | 0.000692627 | Gm30667       | -                     | lincRNA                            | -      | - |
| ENSMUSG00000102912 | 2.85   | 0.022 | -5.503 | 0.000203745 | 0.001158572 | Gm20731       | -                     | TEC                                | -      | - |
| ENSMUSG00000103126 | 9.7    | 0.249 | -2.004 | 0.012729354 | 0.032780616 | Gm37387       | -                     | lincRNA                            | -      | - |
| ENSMUSG00000103286 | 124.03 | 0.133 | -2.91  | 1.23946E-18 | 5.71651E-16 | Gm5850        | -                     | processed_pseudogene               | -      | - |
| ENSMUSG00000103297 | 4.95   | 0.013 | -6.27  | 0.000124889 | 0.000780838 | Ighv3-2       | -                     | IG_V_pseudogene                    | -      | - |
| ENSMUSG00000103367 | 190.55 | 5.687 | 2.508  | 3.28864E-09 | 1.38717E-07 | Gm38158       | -                     | processed_pseudogene               | -      | - |
| ENSMUSG00000103442 | 34.33  | 4.602 | 2.202  | 1.41794E-08 | 4.54981E-07 | Pcdha1        | protocadherin alpha 1 | protein_coding                     | 116731 | - |
| ENSMUSG00000103529 | 41.44  | 5.471 | 2.452  | 3.01494E-07 | 5.66689E-06 | A730089K16Rik | -                     | TEC                                | -      | - |
| ENSMUSG00000103586 | 16.6   | 0.174 | -2.524 | 1.76349E-05 | 0.000160284 | 5830405F06Rik | -                     | lincRNA                            | -      | - |
| ENSMUSG00000103735 | 27.23  | 5.347 | 2.419  | 1.50613E-06 | 2.1243E-05  | Gm38317       | -                     | processed_pseudogene               | -      | - |
| ENSMUSG00000103865 | 14.33  | 5.867 | 2.553  | 2.79689E-05 | 0.000233598 | Gm37416       | -                     | TEC                                | -      | - |
| ENSMUSG00000103927 | 12.19  | 8.026 | 3.005  | 0.001324142 | 0.005305132 | Gm9932        | -                     | lincRNA                            | -      | - |
| ENSMUSG00000103955 | 23.52  | 4.584 | 2.197  | 1.9302E-05  | 0.000172642 | Gm37270       | -                     | TEC                                | -      | - |
| ENSMUSG00000103965 | 3.7    | 4.393 | 2.135  | 0.02034503  | 0.047663605 | Gm30173       | -                     | lincRNA                            | -      | - |
| ENSMUSG00000104028 | 124.03 | 0.133 | -2.91  | 1.24071E-18 | 5.71651E-16 | Gm5851        | -                     | processed_pseudogene               | -      | - |
| ENSMUSG00000104148 | 33.67  | 4.493 | 2.168  | 2.42395E-08 | 7.00255E-07 | Pcdha2        | protocadherin alpha 2 | protein_coding                     | 353234 | - |
| ENSMUSG00000104211 | 7.57   | 5.12  | 2.356  | 0.004583263 | 0.014438404 | Gm37985       | -                     | TEC                                | -      | - |
| ENSMUSG00000104213 | 438.98 | 0.004 | -7.88  | 3.37929E-45 | 3.03612E-41 | Ighd          | -                     | IG_C_gene                          | -      | - |
| ENSMUSG00000104245 | 9.71   | 0.224 | -2.161 | 0.002530644 | 0.008960227 | Gm38155       | -                     | antisense_RNA                      | -      | - |
| ENSMUSG00000104309 | 4.38   | 0.014 | -6.116 | 2.3562E-05  | 0.000202674 | Gm5846        | -                     | processed_pseudogene               | -      | - |
| ENSMUSG00000104350 | 10.98  | 0.201 | -2.313 | 0.001261674 | 0.005106084 | Gm38244       | -                     | TEC                                | -      | - |

|                    |       |       |        |             |             |                   |                       |                      |               |   |
|--------------------|-------|-------|--------|-------------|-------------|-------------------|-----------------------|----------------------|---------------|---|
| ENSMUSG00000104413 | 9.28  | 0.164 | -2.605 | 0.000563539 | 0.002638414 | Gm37065           | -                     | antisense_RNA        | -             | - |
| ENSMUSG00000104448 | 5.46  | 4.608 | 2.204  | 0.001650908 | 0.006349566 | Gm37256           | -                     | lincRNA              | -             | - |
| ENSMUSG00000104452 | 3.8   | 0.017 | -5.886 | 7.69674E-05 | 0.00052747  | Ighv8-8           | -                     | IG_V_gene            | -             | - |
| ENSMUSG00000104531 | 5.11  | 6.399 | 2.678  | 0.001361808 | 0.005428669 | Gm43731           | -                     | lincRNA              | -             | - |
| ENSMUSG00000104594 | 11.65 | 0.088 | -3.508 | 0.000208443 | 0.001180806 | Gm24022           | -                     | miRNA                | -             | - |
| ENSMUSG00000104699 | 3.36  | 0.094 | -3.41  | 0.006219438 | 0.018567383 | Rps4x-ps          | -                     | processed_pseudogene | -             | - |
| ENSMUSG00000104748 | 5.86  | 5.212 | 2.382  | 0.008636747 | 0.024109633 | Gm43592           | -                     | TEC                  | -             | - |
| ENSMUSG00000104785 | 11.09 | 4.836 | 2.274  | 0.000170949 | 0.001003848 | Gm31121           | predicted gene, 31121 | lincRNA              | 102633<br>249 | - |
| ENSMUSG00000104791 | 4.39  | 6.075 | 2.603  | 0.00242822  | 0.008667331 | 493051M18<br>Rik  | -                     | sense_overlapping    | -             | - |
| ENSMUSG00000104795 | 4.98  | 4.082 | 2.029  | 0.017102878 | 0.041529947 | Gm42783           | -                     | TEC                  | -             | - |
| ENSMUSG00000104818 | 51.53 | 4.264 | 2.092  | 3.00073E-06 | 3.73926E-05 | Gm43661           | -                     | lincRNA              | -             | - |
| ENSMUSG00000104927 | 20.6  | 0.06  | -4.057 | 1.89448E-12 | 2.41804E-10 | Gm43388           | -                     | lincRNA              | -             | - |
| ENSMUSG00000104975 | 55.36 | 0.014 | -6.2   | 1.0798E-26  | 1.14134E-23 | Iglj2             | -                     | IG_J_gene            | -             | - |
| ENSMUSG00000105039 | 15.41 | 4.867 | 2.283  | 0.000867472 | 0.003750627 | Gm32585           | -                     | lincRNA              | -             | - |
| ENSMUSG00000105128 | 10.36 | 0.051 | -4.292 | 1.59276E-07 | 3.29347E-06 | Gm42870           | -                     | TEC                  | -             | - |
| ENSMUSG00000105140 | 11.5  | 0.114 | -3.132 | 2.70732E-06 | 3.42832E-05 | Gm43127           | -                     | TEC                  | -             | - |
| ENSMUSG00000105157 | 10.84 | 6.75  | 2.755  | 0.000342806 | 0.001763251 | Gm31831           | -                     | lincRNA              | -             | - |
| ENSMUSG00000105160 | 7.8   | 0.008 | -7.012 | 1.23443E-07 | 2.65328E-06 | A530030E21<br>Rik | -                     | TEC                  | -             | - |
| ENSMUSG00000105195 | 6.55  | 4.118 | 2.042  | 0.006675852 | 0.019620279 | Gm43584           | -                     | processed_transcript | -             | - |
| ENSMUSG00000105231 | 11.1  | 0.006 | -7.457 | 1.20261E-10 | 8.31141E-09 | Iglj3             | -                     | IG_J_gene            | -             | - |
| ENSMUSG00000105233 | 5.94  | 0.186 | -2.426 | 0.004559221 | 0.014377789 | Gm20568           | -                     | processed_pseudogene | -             | - |
| ENSMUSG00000105255 | 13.75 | 0.221 | -2.178 | 0.00030722  | 0.001614161 | Gm42413           | -                     | antisense_RNA        | -             | - |
| ENSMUSG00000105324 | 7.19  | 5.874 | 2.554  | 0.004334671 | 0.013863107 | Gm42705           | -                     | lincRNA              | -             | - |
| ENSMUSG00000105361 | 11.75 | 4.536 | 2.182  | 0.001377888 | 0.005476692 | AY036118          | -                     | lincRNA              | -             | - |



|                    |         |        |        |             |             |                |                            |                      |               |   |
|--------------------|---------|--------|--------|-------------|-------------|----------------|----------------------------|----------------------|---------------|---|
| ENSMUSG00000105388 | 21.49   | 0.134  | -2.903 | 6.62082E-07 | 1.07958E-05 | Rpl36a-ps2     | -                          | processed_pseudogene | -             | - |
| ENSMUSG00000105518 | 56.83   | 0.2    | -2.324 | 1.02905E-07 | 2.29669E-06 | Gm42674        | -                          | protein_coding       | -             | - |
| ENSMUSG00000105547 | 67.46   | 0.014  | -6.125 | 1.1644E-27  | 1.60947E-24 | Iglc3          | -                          | IG_C_gene            | -             | - |
| ENSMUSG00000105646 | 1071.78 | 0.077  | -3.693 | 1.26795E-06 | 1.83592E-05 | Gm30211        | -                          | lincRNA              | -             | - |
| ENSMUSG00000105797 | 5.78    | 8.769  | 3.132  | 0.000814657 | 0.003569511 | Gm5149         | -                          | lincRNA              | -             | - |
| ENSMUSG00000105827 | 17.03   | 6.047  | 2.596  | 5.39806E-06 | 6.07374E-05 | Hist2h2bb      | histone cluster 2, H2bb    | protein_coding       | 319189        | - |
| ENSMUSG00000105866 | 130.66  | 0.184  | -2.444 | 2.47521E-05 | 0.000210792 | Gm6745         | -                          | processed_pseudogene | -             | - |
| ENSMUSG00000105891 | 16.46   | 4.127  | 2.045  | 0.001892071 | 0.007088955 | A230001M10 Rik | RIKEN cDNA A230001M10 gene | lincRNA              | 319951        | - |
| ENSMUSG00000105906 | 25.7    | 0.088  | -3.498 | 1.91171E-12 | 2.41912E-10 | Iglc1          | -                          | IG_C_gene            | -             | - |
| ENSMUSG00000105913 | 529.52  | 0.174  | -2.52  | 7.06252E-10 | 3.78825E-08 | Mir5121        | microRNA 5121              | miRNA                | 100628<br>629 | - |
| ENSMUSG00000105914 | 7.96    | 0.136  | -2.88  | 0.000121832 | 0.00076465  | Gm19243        | -                          | processed_pseudogene | -             | - |
| ENSMUSG00000106019 | 65.76   | 4.797  | 2.262  | 9.72676E-08 | 2.18535E-06 | Gm43672        | -                          | lincRNA              | -             | - |
| ENSMUSG00000106053 | 21.27   | 8.131  | 3.023  | 4.26832E-08 | 1.10356E-06 | Gm20752        | predicted gene, 20752      | lincRNA              | 624759        | - |
| ENSMUSG00000106106 | 209.48  | 0.191  | -2.387 | 4.48449E-10 | 2.53402E-08 | CT010467.1     | -                          | rRNA                 | -             | - |
| ENSMUSG00000106139 | 4.43    | 6.568  | 2.715  | 0.011162174 | 0.029618001 | Gm30648        | -                          | lincRNA              | -             | - |
| ENSMUSG00000106319 | 8.52    | 4.62   | 2.208  | 0.000775456 | 0.003417752 | Gm42601        | predicted gene, 33100      | lincRNA              | 102635<br>874 | - |
| ENSMUSG00000106321 | 6.92    | 25.658 | 4.681  | 1.84583E-06 | 2.5146E-05  | Gm43674        | -                          | lincRNA              | -             | - |
| ENSMUSG00000106350 | 11.89   | 4.783  | 2.258  | 0.000520174 | 0.002477343 | Gm4869         | predicted gene 4869        | protein_coding       | 101055<br>939 | - |
| ENSMUSG00000106423 | 5.04    | 4.516  | 2.175  | 0.003954194 | 0.012855601 | Gm42825        | -                          | lincRNA              | -             | - |
| ENSMUSG00000106567 | 116.77  | 0.059  | -4.074 | 1.91763E-23 | 1.56627E-20 | 2010309G21R ik | -                          | antisense_RNA        | -             | - |
| ENSMUSG00000106609 | 12.84   | 4.654  | 2.218  | 0.001116264 | 0.004619564 | Gm43181        | -                          | TEC                  | -             | - |
| ENSMUSG00000106666 | 1.9     | 0.034  | -4.881 | 0.002574021 | 0.009073688 | Gm43587        | -                          | processed_pseudogene | -             | - |
| ENSMUSG00000106668 | 5.85    | 0.011  | -6.528 | 9.44122E-07 | 1.44382E-05 | Iglj1          | -                          | IG_J_gene            | -             | - |
| ENSMUSG00000106702 | 26.38   | 0.218  | -2.2   | 2.0371E-07  | 4.0669E-06  | Gm42846        | -                          | antisense_RNA        | -             | - |

|                    |        |       |        |             |             |               |                            |  |                      |           |   |
|--------------------|--------|-------|--------|-------------|-------------|---------------|----------------------------|--|----------------------|-----------|---|
| ENSMUSG00000106737 | 125.43 | 5.674 | 2.504  | 1.09054E-12 | 1.60622E-10 | Gm42962       | -                          |  | antisense_RNA        | -         | - |
| ENSMUSG00000106741 | 7.34   | 5.14  | 2.362  | 0.000665621 | 0.003018816 | 4930513D17Rik | RIKEN cDNA 4930513D17 gene |  | lincRNA              | 75095     | - |
| ENSMUSG00000106752 | 62.1   | 5.985 | 2.581  | 9.2446E-07  | 1.42101E-05 | Gm3348        | -                          |  | processed_pseudogene | -         | - |
| ENSMUSG00000106767 | 4.44   | 0.127 | -2.974 | 0.001475769 | 0.005798841 | Gm42727       | -                          |  | TEC                  | -         | - |
| ENSMUSG00000106788 | 12.58  | 4.196 | 2.069  | 0.000152636 | 0.000919916 | Gm43449       | -                          |  | antisense_RNA        | -         | - |
| ENSMUSG00000106794 | 5.66   | 4.151 | 2.053  | 0.005474977 | 0.016728092 | Gm40293       | -                          |  | lincRNA              | -         | - |
| ENSMUSG00000106863 | 7.02   | 4.611 | 2.205  | 0.007913906 | 0.02246879  | Gm42109       | -                          |  | processed_transcript | -         | - |
| ENSMUSG00000107071 | 25.08  | 0.239 | -2.063 | 0.000167367 | 0.000988306 | Gm42420       | -                          |  | protein_coding       | -         | - |
| ENSMUSG00000107096 | 4.91   | 0.11  | -3.185 | 0.000438333 | 0.002161472 | Gm43597       | -                          |  | lincRNA              | -         | - |
| ENSMUSG00000107157 | 66.89  | 5.741 | 2.521  | 8.50554E-07 | 1.32326E-05 | Gm3170        | -                          |  | processed_pseudogene | -         | - |
| ENSMUSG00000107191 | 16.95  | 0.164 | -2.611 | 2.0876E-05  | 0.000184244 | Gm43579       | -                          |  | antisense_RNA        | -         | - |
| ENSMUSG00000107192 | 8.82   | 6.328 | 2.662  | 0.00307091  | 0.010470814 | Gm19583       | predicted gene, 19583      |  | lincRNA              | 100503184 | - |
| ENSMUSG00000107230 | 7.1    | 0.193 | -2.374 | 0.001286839 | 0.005185738 | Gm19265       | -                          |  | antisense_RNA        | -         | - |
| ENSMUSG00000107314 | 6.42   | 4.542 | 2.183  | 0.012399854 | 0.032147306 | Gm20488       | -                          |  | processed_transcript | -         | - |
| ENSMUSG00000107368 | 5.54   | 0.211 | -2.246 | 0.009140917 | 0.025230897 | 1700018A23Rik | RIKEN cDNA 1700018A23 gene |  | antisense_RNA        | 72231     | - |
| ENSMUSG00000107383 | 109.97 | 0.169 | -2.567 | 4.70816E-13 | 7.4868E-11  | Gm4366        | -                          |  | processed_pseudogene | -         | - |
| ENSMUSG00000107427 | 13.09  | 4.717 | 2.238  | 0.001590994 | 0.006161331 | Gm43948       | -                          |  | antisense_RNA        | -         | - |
| ENSMUSG00000107481 | 8.15   | 0.138 | -2.855 | 0.000600063 | 0.002781059 | 4833403J16Rik | -                          |  | lincRNA              | -         | - |
| ENSMUSG00000107486 | 8.38   | 0.232 | -2.106 | 0.004488478 | 0.014228647 | Trbv4         | -                          |  | TR_V_gene            | -         | - |
| ENSMUSG00000107494 | 5.42   | 5.167 | 2.369  | 0.003825741 | 0.012517252 | Gm8239        | -                          |  | lincRNA              | -         | - |
| ENSMUSG00000107528 | 46.46  | 5.387 | 2.43   | 4.38451E-08 | 1.12587E-06 | Gm44442       | -                          |  | lincRNA              | -         | - |
| ENSMUSG00000107666 | 12.45  | 4.332 | 2.115  | 0.000147465 | 0.00089539  | 4933406J09Rik | -                          |  | antisense_RNA        | -         | - |
| ENSMUSG00000107724 | 13.81  | 0.238 | -2.071 | 0.000553171 | 0.002597996 | Gm16042       | -                          |  | processed_pseudogene | -         | - |
| ENSMUSG00000107887 | 4.56   | 6.233 | 2.64   | 0.002131349 | 0.007817556 | Gm43950       | -                          |  | lincRNA              | -         | - |

|                    |        |       |        |             |             |               |   |                            |                      |               |   |
|--------------------|--------|-------|--------|-------------|-------------|---------------|---|----------------------------|----------------------|---------------|---|
| ENSMUSG00000107960 | 3.07   | 6.5   | 2.7    | 0.01199392  | 0.031334507 | Gm35077       | - |                            | lincRNA              | -             | - |
| ENSMUSG00000108033 | 233.26 | 4.873 | 2.285  | 5.22995E-09 | 2.04743E-07 | Gm44284       | - |                            | antisense_RNA        | -             | - |
| ENSMUSG00000108196 | 28.7   | 4.815 | 2.268  | 2.13939E-05 | 0.000187568 | Gm36328       | - |                            | antisense_RNA        | -             | - |
| ENSMUSG00000108276 | 8.28   | 4.364 | 2.126  | 0.017029387 | 0.041401847 | Gm36640       | - |                            | antisense_RNA        | -             | - |
| ENSMUSG00000108289 | 20.84  | 0.093 | -3.426 | 6.75229E-07 | 1.09308E-05 | Gm44174       | - |                            | lincRNA              | -             | - |
| ENSMUSG00000108298 | 12.3   | 0.186 | -2.423 | 0.000631205 | 0.002893399 | Gm44226       | - |                            | lincRNA              | -             | - |
| ENSMUSG00000108303 | 4.18   | 4.675 | 2.225  | 0.013727123 | 0.034755907 | Gm39075       | - |                            | lincRNA              | -             | - |
| ENSMUSG00000108348 | 5.63   | 0.188 | -2.411 | 0.006332771 | 0.018824411 | Gm42372       | - | predicted gene, 42372      | protein_coding       | 105247<br>240 | - |
| ENSMUSG00000108353 | 31.85  | 0.247 | -2.019 | 2.25916E-06 | 2.95666E-05 | Gm45205       | - |                            | TEC                  | -             | - |
| ENSMUSG00000108366 | 40.01  | 0.202 | -2.31  | 2.00773E-09 | 9.47529E-08 | Gm5586        | - |                            | processed_pseudogene | -             | - |
| ENSMUSG00000108402 | 6.59   | 6.745 | 2.754  | 0.005325817 | 0.016344938 | 9430064I24Rik | - |                            | TEC                  | -             | - |
| ENSMUSG00000108511 | 5.68   | 0.196 | -2.35  | 0.007492745 | 0.021528163 | Gm44987       | - |                            | antisense_RNA        | -             | - |
| ENSMUSG00000108609 | 6.81   | 0.217 | -2.205 | 0.016720213 | 0.040754952 | Gm7424        | - |                            | processed_pseudogene | -             | - |
| ENSMUSG00000108676 | 8.28   | 5.998 | 2.584  | 0.000318369 | 0.001657237 | 1700123J17Rik | - | RIKEN cDNA 1700123J17 gene | lincRNA              | 76728         | - |
| ENSMUSG00000108732 | 11.22  | 0.173 | -2.53  | 0.001321755 | 0.005300293 | 2310043P16Rik | - |                            | TEC                  | -             | - |
| ENSMUSG00000108782 | 5.94   | 6.298 | 2.655  | 0.003468518 | 0.011548229 | Gm32772       | - |                            | lincRNA              | -             | - |
| ENSMUSG00000108828 | 6.84   | 4.204 | 2.072  | 0.008879756 | 0.02464965  | Gm34549       | - |                            | lincRNA              | -             | - |
| ENSMUSG00000108854 | 16.02  | 6.991 | 2.805  | 0.0002529   | 0.001380425 | D830036C21Rik | - |                            | lincRNA              | -             | - |
| ENSMUSG00000108867 | 3.93   | 4.016 | 2.006  | 0.016557683 | 0.040422208 | Gm44643       | - |                            | lincRNA              | -             | - |
| ENSMUSG00000108981 | 8.86   | 7.083 | 2.824  | 2.32823E-05 | 0.000200748 | Gm15262       | - | predicted gene 15262       | protein_coding       | 108168<br>453 | - |
| ENSMUSG00000108986 | 11.12  | 4.685 | 2.228  | 0.001545968 | 0.006023307 | Gm32061       | - | predicted gene, 32061      | lincRNA              | 102634<br>490 | - |
| ENSMUSG00000109014 | 8.78   | 4.513 | 2.174  | 0.000550621 | 0.002590079 | Gm44546       | - |                            | lincRNA              | -             | - |
| ENSMUSG00000109088 | 7.62   | 5.201 | 2.379  | 0.004845719 | 0.015150989 | Gm44593       | - |                            | lincRNA              | -             | - |
| ENSMUSG00000109198 | 4.18   | 0.014 | -6.121 | 4.38983E-05 | 0.000336093 | D7Bwg0826e    | - |                            | TEC                  | -             | - |

|                    |        |        |        |             |             |               |                                        |                      |           |   |
|--------------------|--------|--------|--------|-------------|-------------|---------------|----------------------------------------|----------------------|-----------|---|
| ENSMUSG00000109260 | 6.25   | 5.586  | 2.482  | 0.012101536 | 0.031558896 | Gm30954       | predicted gene, 30954                  | lincRNA              | 102633030 | - |
| ENSMUSG00000109266 | 2.36   | 0.026  | -5.243 | 0.000735594 | 0.003279061 | Gm6426        | -                                      | processed_pseudogene | -         | - |
| ENSMUSG00000109324 | 40.31  | 0.222  | -2.173 | 1.2235E-06  | 1.78741E-05 | Prmt1         | protein arginine N-methyltransferase 1 | protein_coding       | 15469     | - |
| ENSMUSG00000109510 | 12.23  | 0.199  | -2.333 | 0.000358494 | 0.001825273 | Gm42417       | -                                      | protein_coding       | -         | - |
| ENSMUSG00000109554 | 9.63   | 5.105  | 2.352  | 0.001464254 | 0.00576494  | A230057D06Rik | -                                      | lincRNA              | -         | - |
| ENSMUSG00000109656 | 5.5    | 0.095  | -3.402 | 0.000313108 | 0.001640305 | Gm45548       | -                                      | TEC                  | -         | - |
| ENSMUSG00000109704 | 27.52  | 12.477 | 3.641  | 5.10251E-06 | 5.78467E-05 | Gm38414       | predicted gene, 38414                  | lincRNA              | 330738    | - |
| ENSMUSG00000109799 | 24.15  | 0.182  | -2.46  | 4.45639E-06 | 5.18297E-05 | Gm45515       | -                                      | antisense_RNA        | -         | - |
| ENSMUSG00000109838 | 38.91  | 3.999  | 2      | 2.37615E-06 | 3.09174E-05 | Gm45341       | -                                      | lincRNA              | -         | - |
| ENSMUSG00000109903 | 7.71   | 5.927  | 2.567  | 0.001710421 | 0.006530931 | AC158589.1    | -                                      | protein_coding       | -         | - |
| ENSMUSG00000109933 | 23.1   | 0.243  | -2.042 | 2.11218E-06 | 2.80101E-05 | Gm7600        | -                                      | processed_pseudogene | -         | - |
| ENSMUSG00000109947 | 12.46  | 0.221  | -2.177 | 0.001365472 | 0.0054416   | Gm45669       | -                                      | antisense_RNA        | -         | - |
| ENSMUSG00000109961 | 5.64   | 4.971  | 2.314  | 0.01218606  | 0.031702809 | Gm31983       | -                                      | lincRNA              | -         | - |
| ENSMUSG00000109966 | 9.42   | 5.481  | 2.454  | 0.000670956 | 0.003038409 | Gm34623       | predicted gene, 34623                  | lincRNA              | 102637934 | - |
| ENSMUSG00000109967 | 627.19 | 4.847  | 2.277  | 8.43157E-08 | 1.93249E-06 | Gm45883       | -                                      | processed_transcript | -         | - |
| ENSMUSG00000110057 | 13.84  | 0.13   | -2.94  | 5.05504E-06 | 5.74899E-05 | Gm2225        | -                                      | processed_pseudogene | -         | - |
| ENSMUSG00000110138 | 4.66   | 4.764  | 2.252  | 0.019798462 | 0.046656861 | 4831440D22Rik | -                                      | antisense_RNA        | -         | - |
| ENSMUSG00000110217 | 17.87  | 10.43  | 3.383  | 1.47155E-06 | 2.08535E-05 | Gm45408       | -                                      | lincRNA              | -         | - |
| ENSMUSG00000110279 | 798.59 | 0.225  | -2.151 | 6.01681E-09 | 2.30091E-07 | Gm45552       | -                                      | antisense_RNA        | -         | - |
| ENSMUSG00000110286 | 21.14  | 5.994  | 2.583  | 2.39721E-05 | 0.000205513 | Gm7706        | -                                      | lincRNA              | -         | - |
| ENSMUSG00000110333 | 16.52  | 6.109  | 2.611  | 2.12472E-06 | 2.8109E-05  | Gm45861       | POTE ankyrin domain family, member G   | protein_coding       | 70952     | - |
| ENSMUSG00000110344 | 262.2  | 5.241  | 2.39   | 6.95661E-09 | 2.5668E-07  | Gm45716       | -                                      | protein_coding       | -         | - |
| ENSMUSG00000110408 | 33.35  | 6.793  | 2.764  | 1.25249E-06 | 1.82234E-05 | Gm45881       | -                                      | lincRNA              | -         | - |
| ENSMUSG00000110423 | 14.97  | 0.139  | -2.852 | 2.10882E-06 | 2.79862E-05 | Gm45736       | -                                      | protein_coding       | -         | - |

|                    |       |       |        |             |             |               |                                                             |                                  |       |   |
|--------------------|-------|-------|--------|-------------|-------------|---------------|-------------------------------------------------------------|----------------------------------|-------|---|
| ENSMUSG00000110455 | 9.9   | 6.072 | 2.602  | 2.33453E-05 | 0.000201195 | Gm45904       | -                                                           | antisense_RNA                    | -     | - |
| ENSMUSG00000110537 | 48.55 | 4.345 | 2.119  | 8.69468E-06 | 8.93833E-05 | Gm4316        | -                                                           | lincRNA                          | -     | - |
| ENSMUSG00000110545 | 6.28  | 0.167 | -2.58  | 0.002601198 | 0.009150533 | Gm7730        | -                                                           | processed_pseudogene             | -     | - |
| ENSMUSG00000110575 | 19.91 | 0.134 | -2.904 | 1.25649E-06 | 1.82637E-05 | 6330537M06Rik | -                                                           | TEC                              | -     | - |
| ENSMUSG00000110629 | 7.89  | 14.95 | 3.902  | 7.64311E-05 | 0.000524796 | 4930567H12Rik | RIKEN cDNA 4930567H12 gene                                  | lincRNA                          | 75930 | - |
| ENSMUSG00000110631 | 13.44 | 4.824 | 2.27   | 0.003106889 | 0.010569423 | Gm42047       | -                                                           | lincRNA                          | -     | - |
| ENSMUSG00000110649 | 32.08 | 0.189 | -2.402 | 7.80875E-09 | 2.81758E-07 | Gm40466       | -                                                           | unprocessed_pseudogene           | -     | - |
| ENSMUSG00000110747 | 84.64 | 6.376 | 2.673  | 2.64389E-10 | 1.5889E-08  | AC156031.1    | -                                                           | lincRNA                          | -     | - |
| ENSMUSG00000110766 | 54.79 | 4.208 | 2.073  | 4.15681E-07 | 7.3881E-06  | AC154295.1    | -                                                           | lincRNA                          | -     | - |
| ENSMUSG00000110784 | 5.97  | 7.845 | 2.972  | 0.003240347 | 0.010949228 | AC164881.1    | -                                                           | lincRNA                          | -     | - |
| ENSMUSG00000110824 | 4.46  | 6.181 | 2.628  | 0.007580795 | 0.021739435 | AC133947.1    | -                                                           | antisense_RNA                    | -     | - |
| ENSMUSG00000110843 | 8.82  | 4.573 | 2.193  | 0.001064603 | 0.004440542 | AC153829.1    | -                                                           | lincRNA                          | -     | - |
| ENSMUSG00000110862 | 5.98  | 9.514 | 3.25   | 8.71838E-05 | 0.000584337 | CT025619.2    | -                                                           | lincRNA                          | -     | - |
| ENSMUSG00000110884 | 5.33  | 5.827 | 2.543  | 0.015780522 | 0.038897146 | AC164161.2    | -                                                           | lincRNA                          | -     | - |
| ENSMUSG00000110893 | 7.69  | 6.226 | 2.638  | 0.00115532  | 0.004748386 | AC158596.1    | -                                                           | lincRNA                          | -     | - |
| ENSMUSG00000110949 | 10.34 | 0.228 | -2.13  | 0.006160661 | 0.018440932 | Nudt8         | nudix (nucleoside diphosphate linked moiety X)-type motif 8 | protein_coding                   | 66387 | - |
| ENSMUSG00000111042 | 13.09 | 6.411 | 2.68   | 4.01399E-05 | 0.00031224  | AC099761.1    | -                                                           | transcribed_processed_pseudogene | -     | - |
| ENSMUSG00000111044 | 12.21 | 0.171 | -2.549 | 4.10726E-05 | 0.000318667 | AC117688.1    | -                                                           | antisense_RNA                    | -     | - |
| ENSMUSG00000111052 | 11.22 | 4.432 | 2.148  | 0.014457969 | 0.036208397 | AC158622.3    | -                                                           | lincRNA                          | -     | - |
| ENSMUSG00000111091 | 8.74  | 4.725 | 2.24   | 0.002229066 | 0.008114684 | AC153897.1    | -                                                           | lincRNA                          | -     | - |
| ENSMUSG00000111118 | 8.96  | 0.183 | -2.446 | 0.017022101 | 0.041389734 | AC151730.1    | -                                                           | processed_pseudogene             | -     | - |
| ENSMUSG00000111133 | 9.51  | 4.975 | 2.315  | 0.000315341 | 0.001648634 | AC160123.2    | -                                                           | processed_pseudogene             | -     | - |
| ENSMUSG00000111182 | 10.02 | 5.201 | 2.379  | 0.001681191 | 0.006445342 | AC158799.1    | -                                                           | lincRNA                          | -     | - |
| ENSMUSG00000111334 | 8.12  | 4.716 | 2.238  | 0.000977656 | 0.004144254 | AC162938.3    | -                                                           | processed_transcript             | -     | - |

|                    |        |       |        |             |             |            |                                                         |                        |               |   |
|--------------------|--------|-------|--------|-------------|-------------|------------|---------------------------------------------------------|------------------------|---------------|---|
| ENSMUSG00000111447 | 30.63  | 4.898 | 2.292  | 3.51398E-09 | 1.47186E-07 | AC153845.3 | -                                                       | antisense_RNA          | -             | - |
| ENSMUSG00000111520 | 5.48   | 7.089 | 2.826  | 0.000493852 | 0.002370199 | AC166902.2 | -                                                       | lincRNA                | -             | - |
| ENSMUSG00000111535 | 10.11  | 4.816 | 2.268  | 0.000325142 | 0.001689552 | AC153955.5 | -                                                       | lincRNA                | -             | - |
| ENSMUSG00000111542 | 11.12  | 0.095 | -3.402 | 1.09267E-05 | 0.000107466 | AC107669.2 | -                                                       | unprocessed_pseudogene | -             | - |
| ENSMUSG00000111602 | 29.43  | 5.651 | 2.498  | 1.03957E-07 | 2.31189E-06 | AC156791.1 | predicted gene, 32014                                   | lincRNA                | 102634<br>431 | - |
| ENSMUSG00000111685 | 20.72  | 4.528 | 2.179  | 1.51033E-05 | 0.000140954 | AC124577.4 | -                                                       | TEC                    | -             | - |
| ENSMUSG00000111692 | 12.84  | 0.123 | -3.021 | 2.25871E-06 | 2.95666E-05 | AC163637.2 | -                                                       | protein_coding         | -             | - |
| ENSMUSG00000111731 | 5.42   | 5.738 | 2.521  | 0.02029358  | 0.047592709 | AC153569.2 | -                                                       | lincRNA                | -             | - |
| ENSMUSG00000111853 | 13     | 5.351 | 2.42   | 0.00932847  | 0.025634389 | AC161596.2 | predicted gene, 31408                                   | lincRNA                | 102633<br>624 | - |
| ENSMUSG00000111856 | 161.06 | 0.129 | -2.949 | 1.18002E-17 | 4.71195E-15 | AC163623.3 | -                                                       | processed_transcript   | -             | - |
| ENSMUSG00000111933 | 9.7    | 6.419 | 2.682  | 0.00014347  | 0.000875982 | AC108401.1 | -                                                       | lincRNA                | -             | - |
| ENSMUSG00000111986 | 5.37   | 5.36  | 2.422  | 0.00801945  | 0.022711295 | AC159888.1 | RIKEN cDNA 1700008C04 gene                              | lincRNA                | 75494         | - |
| ENSMUSG00000112063 | 11.07  | 0.006 | -7.464 | 2.23263E-09 | 1.02256E-07 | AC161114.1 | -                                                       | processed_pseudogene   | -             | - |
| ENSMUSG00000112099 | 25.62  | 0.166 | -2.588 | 4.45521E-09 | 1.799E-07   | AC129329.1 | -                                                       | processed_pseudogene   | -             | - |
| ENSMUSG00000112126 | 10.04  | 5.406 | 2.435  | 0.000782189 | 0.00344465  | AC121788.3 | -                                                       | lincRNA                | -             | - |
| ENSMUSG00000112129 | 4.9    | 6.594 | 2.721  | 0.001360541 | 0.005427349 | Pbd1       | phenazine biosynthesis-like protein domain containing 1 | protein_coding         | 68371         | - |
| ENSMUSG00000112146 | 6.14   | 5.114 | 2.354  | 0.002475302 | 0.008804177 | AC122390.1 | -                                                       | lincRNA                | -             | - |
| ENSMUSG00000112314 | 14.94  | 6.416 | 2.682  | 4.92704E-05 | 0.00036843  | AC155712.2 | -                                                       | lincRNA                | -             | - |
| ENSMUSG00000112372 | 10.34  | 4.35  | 2.121  | 0.001596196 | 0.006180143 | AC155922.2 | -                                                       | lincRNA                | -             | - |
| ENSMUSG00000112426 | 5.14   | 4.111 | 2.04   | 0.007323352 | 0.021125913 | AC114678.1 | -                                                       | antisense_RNA          | -             | - |
| ENSMUSG00000112567 | 6.37   | 0.177 | -2.501 | 0.001698393 | 0.006493283 | CT571245.5 | -                                                       | processed_pseudogene   | -             | - |
| ENSMUSG00000112569 | 16.05  | 5.059 | 2.339  | 0.001717685 | 0.006554487 | CT010463.2 | predicted gene, 33111                                   | lincRNA                | 102635<br>888 | - |
| ENSMUSG00000112659 | 9.06   | 4.101 | 2.036  | 0.009902806 | 0.026916279 | AC153950.2 | -                                                       | lincRNA                | -             | - |
| ENSMUSG00000112704 | 10.8   | 4.338 | 2.117  | 0.000463984 | 0.002258217 | AC124458.1 | predicted gene, 46329                                   | lincRNA                | 108167<br>972 | - |

|                    |        |        |        |             |             |            |                       |  |                      |               |   |
|--------------------|--------|--------|--------|-------------|-------------|------------|-----------------------|--|----------------------|---------------|---|
| ENSMUSG00000112713 | 23.51  | 9.306  | 3.218  | 1.16043E-06 | 1.70776E-05 | AC122301.3 | -                     |  | lincRNA              | -             | - |
| ENSMUSG00000112818 | 4.55   | 5.424  | 2.439  | 0.002641629 | 0.009266796 | AC153830.1 | -                     |  | lincRNA              | -             | - |
| ENSMUSG00000112833 | 5.83   | 4.966  | 2.312  | 0.007559379 | 0.021684941 | AC152949.3 | -                     |  | lincRNA              | -             | - |
| ENSMUSG00000112857 | 20.61  | 8.302  | 3.053  | 3.2748E-07  | 6.03537E-06 | AC124556.2 | -                     |  | lincRNA              | -             | - |
| ENSMUSG00000112907 | 18.2   | 0.186  | -2.426 | 0.00054694  | 0.002576526 | AC164623.1 | -                     |  | lincRNA              | -             | - |
| ENSMUSG00000112908 | 54.48  | 0.209  | -2.259 | 1.8143E-06  | 2.48295E-05 | AC126687.1 | -                     |  | processed_pseudogene | -             | - |
| ENSMUSG00000113017 | 10.56  | 5.316  | 2.41   | 0.000895392 | 0.003854648 | AC154816.1 | -                     |  | lincRNA              | -             | - |
| ENSMUSG00000113030 | 14.21  | 0.211  | -2.241 | 4.62232E-05 | 0.000351199 | CT009754.1 | -                     |  | processed_transcript | -             | - |
| ENSMUSG00000113032 | 13.27  | 8.405  | 3.071  | 0.000318213 | 0.0016569   | AC158633.3 | -                     |  | antisense_RNA        | -             | - |
| ENSMUSG00000113061 | 116.98 | 0.153  | -2.707 | 1.93983E-11 | 1.79674E-09 | AL607105.1 | -                     |  | protein_coding       | -             | - |
| ENSMUSG00000113113 | 5.98   | 0.146  | -2.773 | 0.002981975 | 0.010219935 | AC159818.1 | -                     |  | processed_pseudogene | -             | - |
| ENSMUSG00000113149 | 240.67 | 0.25   | -2     | 2.45115E-09 | 1.11224E-07 | AC099934.3 | -                     |  | protein_coding       | -             | - |
| ENSMUSG00000113158 | 5.23   | 10.685 | 3.418  | 0.000163857 | 0.000972376 | AC099934.4 | -                     |  | lincRNA              | -             | - |
| ENSMUSG00000113198 | 5.61   | 0.097  | -3.361 | 0.000214677 | 0.001208501 | AL591207.1 | -                     |  | processed_pseudogene | -             | - |
| ENSMUSG00000113204 | 13.04  | 0.212  | -2.235 | 0.000496552 | 0.002379343 | CT009718.4 | predicted gene, 46430 |  | lincRNA              | 108168<br>101 | - |
| ENSMUSG00000113235 | 8.96   | 4.439  | 2.15   | 0.002287117 | 0.008268751 | AC159293.1 | -                     |  | lincRNA              | -             | - |
| ENSMUSG00000113272 | 7.06   | 4.344  | 2.119  | 0.001274447 | 0.005143877 | CT030658.1 | predicted gene, 34809 |  | lincRNA              | 102638<br>187 | - |
| ENSMUSG00000113295 | 55.56  | 0.217  | -2.201 | 2.08756E-08 | 6.24149E-07 | CT030657.1 | -                     |  | lincRNA              | -             | - |
| ENSMUSG00000113330 | 8.96   | 4.168  | 2.059  | 0.005968544 | 0.017964618 | AC155241.3 | -                     |  | lincRNA              | -             | - |
| ENSMUSG00000113358 | 8.31   | 4.769  | 2.254  | 0.000175861 | 0.00102732  | CT025627.1 | -                     |  | lincRNA              | -             | - |
| ENSMUSG00000113387 | 11.87  | 6.284  | 2.652  | 4.76389E-05 | 0.000359825 | AC162181.1 | -                     |  | lincRNA              | -             | - |
| ENSMUSG00000113389 | 35.77  | 0.106  | -3.231 | 8.90697E-13 | 1.34495E-10 | AC126799.2 | -                     |  | processed_pseudogene | -             | - |
| ENSMUSG00000113465 | 16.91  | 0.196  | -2.354 | 0.000285645 | 0.00151812  | AC127270.2 | predicted gene, 40271 |  | lincRNA              | 105244<br>713 | - |
| ENSMUSG00000113471 | 37.38  | 0.052  | -4.264 | 2.16897E-15 | 6.00016E-13 | CT030657.2 | -                     |  | lincRNA              | -             | - |

|                    |          |        |        |             |             |            |                                      |                      |           |   |
|--------------------|----------|--------|--------|-------------|-------------|------------|--------------------------------------|----------------------|-----------|---|
| ENSMUSG00000113550 | 11.5     | 4.29   | 2.101  | 0.000493651 | 0.002369867 | AC162801.2 | predicted gene, 29687                | lincRNA              | 629481    | - |
| ENSMUSG00000113558 | 4.11     | 4.396  | 2.136  | 0.008403461 | 0.023582975 | AC104834.1 | -                                    | protein_coding       | -         | - |
| ENSMUSG00000113630 | 7.1      | 5.138  | 2.361  | 0.006720555 | 0.01971894  | CT010460.2 | RIKEN cDNA 4930404H11 gene           | lincRNA              | 73815     | - |
| ENSMUSG00000113717 | 7.34     | 4.764  | 2.252  | 0.010702409 | 0.028686097 | AC110901.1 | -                                    | lincRNA              | -         | - |
| ENSMUSG00000113769 | 29.9     | 4.932  | 2.302  | 0.001772974 | 0.006721215 | AC132623.2 | RIKEN cDNA 5033406O09 gene           | lincRNA              | 77675     | - |
| ENSMUSG00000113831 | 6.81     | 0.245  | -2.027 | 0.008725898 | 0.024309406 | AC163032.1 | -                                    | lincRNA              | -         | - |
| ENSMUSG00000113867 | 6.25     | 4.283  | 2.099  | 0.013293732 | 0.033892603 | AC132237.3 | -                                    | lincRNA              | -         | - |
| ENSMUSG00000113895 | 4.49     | 4.233  | 2.082  | 0.004438055 | 0.014121931 | AC123705.4 | -                                    | antisense_RNA        | -         | - |
| ENSMUSG00000113949 | 46.76    | 0.209  | -2.255 | 4.91362E-09 | 1.94478E-07 | Scamp4     | secretory carrier membrane protein 4 | protein_coding       | 56214     | - |
| ENSMUSG00000114003 | 37.68    | 0.177  | -2.496 | 1.20886E-10 | 8.32263E-09 | AC124744.2 | -                                    | processed_pseudogene | -         | - |
| ENSMUSG00000114014 | 7.43     | 0.178  | -2.492 | 0.001732217 | 0.00659733  | AC134439.3 | -                                    | antisense_RNA        | -         | - |
| ENSMUSG00000114023 | 6.61     | 0.127  | -2.975 | 0.000331156 | 0.001716335 | CT030657.5 | -                                    | processed_pseudogene | -         | - |
| ENSMUSG00000114134 | 12.48    | 4.326  | 2.113  | 0.002121268 | 0.007786938 | AC132324.1 | -                                    | lincRNA              | -         | - |
| ENSMUSG00000114135 | 3.85     | 0.016  | -5.972 | 1.66088E-05 | 0.000152345 | AC129022.1 | -                                    | processed_pseudogene | -         | - |
| ENSMUSG00000114202 | 6.57     | 0.215  | -2.216 | 0.004776859 | 0.014972159 | AC129975.1 | -                                    | processed_pseudogene | -         | - |
| ENSMUSG00000114206 | 43.78    | 6.27   | 2.648  | 2.89148E-09 | 1.26725E-07 | AC159301.1 | predicted gene, 30551                | lincRNA              | 102632492 | - |
| ENSMUSG00000114264 | 7.18     | 0.009  | -6.875 | 2.65375E-08 | 7.54513E-07 | CT030194.1 | -                                    | antisense_RNA        | -         | - |
| ENSMUSG00000114288 | 17.33    | 4.424  | 2.145  | 0.00022014  | 0.001234224 | AC154461.2 | -                                    | lincRNA              | -         | - |
| ENSMUSG00000114389 | 11.15    | 11.974 | 3.582  | 7.90209E-05 | 0.000539281 | CT030182.1 | -                                    | lincRNA              | -         | - |
| ENSMUSG00000114422 | 276.32   | 5.025  | 2.329  | 1.73694E-09 | 8.39006E-08 | AC165281.1 | -                                    | lincRNA              | -         | - |
| ENSMUSG00000114432 | 16293.84 | 4.531  | 2.18   | 8.07658E-05 | 0.000548689 | AC160962.1 | -                                    | protein_coding       | -         | - |
| ENSMUSG00000114446 | 10.17    | 5.066  | 2.341  | 0.002287311 | 0.008268751 | AC123867.1 | -                                    | antisense_RNA        | -         | - |
| ENSMUSG00000114487 | 11733.43 | 4.454  | 2.155  | 6.51382E-05 | 0.00046009  | CT010498.1 | -                                    | protein_coding       | -         | - |
| ENSMUSG00000114635 | 3316.47  | 4.184  | 2.065  | 2.60059E-05 | 0.000219699 | CT010498.2 | -                                    | protein_coding       | -         | - |





**Supplementary Table 3 (A):** GO analysis of differentially expressed genes (DEGs) in the biological process (BP), molecular function (MF) and cellular component (CC) in LD group using the clusterProfiler R package for determining functions of the DEGs based on BH adjusted p-values (adjusted p-value for multiple testing calculated using Benjamin-Hochberg correction method to examine the significance of pathway-term enrichment).

| Column Names | Description                                                                                                                                                              |
|--------------|--------------------------------------------------------------------------------------------------------------------------------------------------------------------------|
| Category     | BP/CC/MF                                                                                                                                                                 |
| ID           | GO ID                                                                                                                                                                    |
| Description  | GO Term Description                                                                                                                                                      |
| p.adjust     | BH adjusted p-values (adjusted p-value for multiple testing calculated using Benjamin-Hochberg correction method to examine the significance of pathway-term enrichment) |
| geneID       | Gene name/symbol                                                                                                                                                         |

| Gene Ontology table control vs LD |            |                                                     |          |                                                                                                                                                                          |
|-----------------------------------|------------|-----------------------------------------------------|----------|--------------------------------------------------------------------------------------------------------------------------------------------------------------------------|
| Category                          | ID_LD      | Description                                         | p.adjust | geneID                                                                                                                                                                   |
| BP                                | GO:0002377 | immunoglobulin production                           | 1.98E-12 | Vpreb3/Ccr6/H2-Ab1/Igkv2-137/Igkv17-127/Igkv13-84/Igkv4-80/Igkv4-72/Igkv4-63/Iglv1/Igkv13-85/Igkv3-12/Igkv10-96/Igkv14-111/Igkv10-94/Igkv14-100/Igkv3-4/Ighd             |
| BP                                | GO:0002440 | production of molecular mediator of immune response | 1.98E-12 | Vpreb3/Slamf1/Cd74/Ccr6/H2-Ab1/Igkv2-137/Igkv17-127/Igkv13-84/Igkv4-80/Igkv4-72/Igkv4-63/Iglv1/Igkv13-85/Igkv3-12/Igkv10-96/Igkv14-111/Igkv10-94/Igkv14-100/Igkv3-4/Ighd |
| BP                                | GO:0042113 | B cell activation                                   | 0.000855 | Cd79a/Blk/Cdkn1a/Cd74/Cd79b/Ccr6/Blnk/Tnfrsf13c/H2-Ab1/Ighv1-74/Ighd                                                                                                     |
| BP                                | GO:0050853 | B cell receptor signaling pathway                   | 0.002473 | Cd79a/Blk/Cd79b/Blnk/Ighv1-74/Ighd                                                                                                                                       |
| BP                                | GO:0050670 | regulation of lymphocyte proliferation              | 0.002473 | Blk/Slamf1/Sdc4/Cdkn1a/Cd74/Pde5a/Tnfrsf13c/H2-Ab1/Ighd                                                                                                                  |
| BP                                | GO:0032944 | regulation of mononuclear cell proliferation        | 0.002473 | Blk/Slamf1/Sdc4/Cdkn1a/Cd74/Pde5a/Tnfrsf13c/H2-Ab1/Ighd                                                                                                                  |
| BP                                | GO:0046651 | lymphocyte proliferation                            | 0.002473 | Cd79a/Blk/Slamf1/Sdc4/Cdkn1a/Cd74/Pde5a/Tnfrsf13c/H2-Ab1/Ighd                                                                                                            |
| BP                                | GO:0032943 | mononuclear cell proliferation                      | 0.002473 | Cd79a/Blk/Slamf1/Sdc4/Cdkn1a/Cd74/Pde5a/Tnfrsf13c/H2-Ab1/Ighd                                                                                                            |
| BP                                | GO:0050866 | negative regulation of cell activation              | 0.004807 | Blk/Sdc4/Cd200/Cd74/Pdgfra/Pde5a/Adgrf5/H2-Ab1                                                                                                                           |
| BP                                | GO:0002683 | negative regulation of immune system process        | 0.011851 | Vpreb3/Blk/Slamf1/Sdc4/Cd200/Cd74/H2-Ob/Pde5a/Adgrf5/H2-Ab1                                                                                                              |
| BP                                | GO:0042060 | wound healing                                       | 0.011851 | Blk/Sdc4/Cdkn1a/Pdgfra/Col5a1/F11r/Ndnf/Serpinb2/Gp6                                                                                                                     |
| BP                                | GO:0016064 | immunoglobulin mediated immune response             | 0.015997 | Fcer2a/Cd74/Ccr6/H2-Ab1/Ighv1-74/Ighd                                                                                                                                    |
| BP                                | GO:0002577 | regulation of antigen processing and presentation   | 0.016902 | Cd74/H2-Ob/H2-Ab1                                                                                                                                                        |
| BP                                | GO:0071674 | mononuclear cell migration                          | 0.017623 | Slamf1/Cd200/F11r/Spns2/Ccr6/Fpr2                                                                                                                                        |

|    |            |                                                                         |          |                                                                           |
|----|------------|-------------------------------------------------------------------------|----------|---------------------------------------------------------------------------|
| BP | GO:0002250 | adaptive immune response                                                | 0.018866 | Cd79a/Fcer2a/Slamf1/Cd74/Cd79b/Ccr6/Tnfrsf13c/H2-Ab1/Ighv1-74/Ighd        |
| BP | GO:0002495 | antigen processing and presentation of peptide antigen via MHC class II | 0.022764 | Cd74/H2-Ob/H2-Ab1                                                         |
| BP | GO:2000510 | positive regulation of dendritic cell chemotaxis                        | 0.034436 | Slamf1/Ccr6                                                               |
| BP | GO:0022407 | regulation of cell-cell adhesion                                        | 0.043386 | Blk/Slamf1/Sdc4/Cd74/Ppm1f/F11r/Pde5a/Tnfrsf13c/H2-Ab1                    |
| CC | GO:0019815 | B cell receptor complex                                                 | 0.001736 | Cd79a/Cd79b/Ighd                                                          |
| CC | GO:0042613 | MHC class II protein complex                                            | 0.001736 | Cd74/H2-Ob/H2-Ab1                                                         |
| CC | GO:0019814 | immunoglobulin complex                                                  | 0.001736 | Cd79a/Cd79b/Ighv1-74/Ighd                                                 |
| CC | GO:0009897 | external side of plasma membrane                                        | 0.001736 | Cd79a/Fcer2a/Slamf1/Cd74/Cd79b/Ccr6/Fcgr2b/Tnfrsf13c/H2-Ab1/Ighv1-74/Ighd |

**Supplementary Table 3 (B):** GO analysis of differentially expressed genes (DEGs) in the biological process (BP), molecular function (MF) and cellular component (CC) in HD group using the clusterProfiler R package for determining functions of the DEGs based on BH adjusted p-values (adjusted p-value for multiple testing calculated using Benjamin-Hochberg correction method to examine the significance of pathway–term enrichment).

| Gene Ontology table control vs HD |            |                                                                                           |           |                                                                                                                                                                                                                                                                                                                                                                                                                                                                                                                                                                                                                            |
|-----------------------------------|------------|-------------------------------------------------------------------------------------------|-----------|----------------------------------------------------------------------------------------------------------------------------------------------------------------------------------------------------------------------------------------------------------------------------------------------------------------------------------------------------------------------------------------------------------------------------------------------------------------------------------------------------------------------------------------------------------------------------------------------------------------------------|
| Category                          | ID_HD      | Description                                                                               | p.adjust  | Genes                                                                                                                                                                                                                                                                                                                                                                                                                                                                                                                                                                                                                      |
| BP                                | GO:0002377 | immunoglobulin production                                                                 | 3.044E-14 | Vpreb3,Il27ra,Cd40,Tcf3,Mzb1,Cd28,Traf6,Cd27,Siglecg,Cd22,Swap70,Cd40lg,Phb,C1cf1,Ccr6,Lax1,H2-Ab1,Igkv2-137,Igkv17-127,Igkv17-121,Igkv16-104,Igkv15-103,Igkv13-84,Igkv4-80,Igkv4-79,Igkv4-74,Igkv4-72,Igkv4-68,Igkv4-63,Igkv4-57-1,Igkv4-57,Igkv5-48,Igkv12-46,Igkv6-32,Igkv8-30,Igkv8-27,Igkv6-13,Igkv3-7,Ighm,Iglv1,Iglv3,Igkv13-85,Igkv1-110,Igkv4-59,Igkv5-45,Igkv3-12,Igkv4-78,Igkv1-117,Igkv8-28,Igkv10-96,Igkv5-43,Igkv1-133,Igkv6-15,Igkv9-120,Igkv10-95,Igkv6-25,Igkv3-5,Igkv3-2,Igkv1-122,Igkv6-23,Igkv4-58,Igkv4-53,Igkv14-111,Igkv6-17,Igkv1-135,Igkv10-94,Igkv8-19,Igkv9-124,Igkv3-4,Igkv6-14,Igkv19-93,Ighd |
| BP                                | GO:0006958 | complement activation, classical pathway                                                  | 1.409E-08 | C1qbp,Cd55,Cr2,Hc,Crp,C1rl,Cfi,Trbc2,Igkc,Ighg2c,Ighg2b,Ighg3,Ighm,Ighv14-4,Igcl2,Igha,Ighv14-2,Ighv14-3,Ighd,Igcl3,Igcl1                                                                                                                                                                                                                                                                                                                                                                                                                                                                                                  |
| BP                                | GO:0050853 | B cell receptor signaling pathway                                                         | 3.253E-06 | Lck,Cd79a,Blk,Gcsam,Ms4a1,Lpxn,Cd38,Cd22,Cd19,Bmx,Bear1,Cd79b,Lat2,Blnk,Trbc2,Igkc,Ighg2c,Ighg2b,Ighg3,Ighm,Ighv14-4,Igcl2,Lime1,Igha,Ighv14-2,Ighv14-3,Ighd,Igcl3,Igcl1                                                                                                                                                                                                                                                                                                                                                                                                                                                   |
| BP                                | GO:0006959 | humoral immune response                                                                   | 5.475E-05 | Fcer2a,Sh2d1a,C1qbp,Ccl1,Cxcl14,Masp1,Cd55,Cr2,Hc,Ppbp,Pf4,Cxcl10,H2-DMa,Crp,Ccr7,C1rl,Phb,Ccr2,Gpr183,Rpl30,Cfi,H2bc12,Jchain,Cd59b,H2-Ab1,Wfdc3,Trbc2,Igkc,Ighg2c,Ighg2b,Ighg3,Ighm,Ighv14-4,Igcl2,Igha,Ighv14-2,Ighv14-3,Ighd,Igcl3,Igcl1                                                                                                                                                                                                                                                                                                                                                                               |
| BP                                | GO:0008037 | cell recognition                                                                          | 0.0001339 | Spa17,Atp8b3,Ephb3,Cct4,Mypn,Cct5,Cd6,Ephb2,Cct6a,Cd9,Clec2i,Adam18,Adam5,Cadm1,Cct2,Prtg,Ccr7,Pla2g5,Crtac1,Cnr1,Megf8,Dscam,Epha3,Robo2,Cntn2,Ovgp1,Trbc2,Igkc,Ighg2c,Ighg2b,Ighg3,Ighm,Ighv14-4,Igcl2,Hspa1b,Igha,Ighv14-2,Ighv14-3,Ighd,Igcl3,Igcl1                                                                                                                                                                                                                                                                                                                                                                    |
| BP                                | GO:0002504 | antigen processing and presentation of peptide or polysaccharide antigen via MHC class II | 0.0001725 | Trem2,H2-Oa,Cd74,Traf6,Pycard,Ifi30,H2-Aa,h2-DMb2,H2-DMa,Thbs1,H2-Ob,H2-Eb1,H2-Ab1,H2-DMb1                                                                                                                                                                                                                                                                                                                                                                                                                                                                                                                                 |
| BP                                | GO:0006935 | chemotaxis                                                                                | 0.0009036 | Fer,Sema6b,Nkx2-1,Ddt,Shh,Kit,Ephb3,Fzd3,Nfib,Met,Trpv4,Slamf1,Etv4,C1qbp,Lhx1,Ccl9,Sema6a,Mypn,Unc5b,Ccl1,Chga,Evl,Cxcl14,F2rl1,Angpt1,Tymp,Pla2g10,St6gal1,Smoc2,Vegfa,Trem2,Cd74,Slit1,Ablim1,Pdgfa,Unc5a,Cxcr2,Ppm1f,Nfasc,Lhx4,Lamc2,Plxna2,Lmx1a,Kif5c,Hc,Pax6,Mdk,Epha8,Ephb2,Sema3c,Draxin,Rhoh,Apb2,Ppbp,Pf4,Flt1,Ephb4,Ptn,Ephb6,Pik3c2g,Swap70,Slit2,Il34,Bcar1,Ppib,Gbx2,Sema3f,Cxcl10,Tpbg,Prtg,P2ry12,Apbb1,Ccr7,Sema6c,Thbs1,Ccr6,Trem1,Ccr2,Cer10,Megf8,S1pr1,Fpr1,Cxcr5,Efna5,Ccr2,Ntf3,C5ar1,Dscam,Gpr18,Gpr183,Fpr2,Epha3,Robo2,Cntn2,Eph a6,Unc5c,Xcr1,Mospd2,Kdr,Gbx1,Rpl13a,Kif5a,Foxd1,Fpr3         |
| BP                                | GO:0010463 | mesenchymal cell proliferation                                                            | 0.0009036 | Sox9,Shh,Nfib,Tbx1,Wnt2,Wnt11,Fgf9,Trp63,Vegfa,Six2,Pdgfa,Prrx1,Bmp2,Lmna,Ptn,Prrx2,Fat4,Six1,Irs1,Kdr                                                                                                                                                                                                                                                                                                                                                                                                                                                                                                                     |
| BP                                | GO:0032944 | regulation of mononuclear cell proliferation                                              | 0.000982  | Shh,Il27ra,Mpl,Tnfrsf13b,Blk,Slamf1,H2-M3,Sdc4,Cd40,Ikzf3,Tcf3,Il6st,St6gal1,Cdkn1a,Cd4,Mzb1,Cd74,Cd6,Cd28,Traf6,Cd1d1,Cd38,Tacr1,Clec2i,Siglecg,Cd22,Rps3,Pycard,Cd40lg,Cd209a,Pawr,H2-                                                                                                                                                                                                                                                                                                                                                                                                                                   |

|    |            |                                                       |           |                                                                                                                                                                                                                                                                                                                                                                                                         |
|----|------------|-------------------------------------------------------|-----------|---------------------------------------------------------------------------------------------------------------------------------------------------------------------------------------------------------------------------------------------------------------------------------------------------------------------------------------------------------------------------------------------------------|
|    |            |                                                       |           | Aa,Crp,Ccr7,Igfbp2,Clcf1,Ticam1,Igf2,Ccr2,Carmil2,Vtcn1,Gpr183,Spn,Btla,Rasal3,Pde5a,Sox11,Tnfrsf13c,Cd59b,H2-Ab1,Clec4g,Ighm,Lrc32,Ighd                                                                                                                                                                                                                                                                |
| BP | GO:0051480 | regulation of cytosolic calcium ion concentration     | 0.0010176 | Lck,Trpv1,Trpv4,Jph2,Ccl1,P2rx1,Chga,F2r2,F2r1,Il6st,Cd4,Tmem178,Ms4a1,Ms4a2,Cxcr2,Trpc3,P2ry1,Cd38,Nos1,Adcyap1r1,Tacr1,Slc8a2,Cd19,Swap70,Atp2b3,Trpc6,Thy1,Hcrtr2,Pth1r,Ank2,Trpc1,Cxcl10,Adrb1,Pawr,Pml,Ccr7,Ccr6,Htr2c,Trpv3,Tmem64,Npsr1,Ccr2,Ccr10,S1pr1,Fpr1,Adra1a,Cxcr5,Ccr2,C5ar1,Kcnk3,Fzd9,Gpr18,Adra1b,P2ry10,Selenon,Cacna1c,Fpr2,Cemip,P2ry10b,Gtf2i,Xcr1,Kdr,Gpr174,Fam155a,Fpr3,Lime1 |
| BP | GO:0060485 | mesenchyme development                                | 0.0019411 | Sox9,Sema6b,Nkx2-1,Col1a1,Shh,Pax2,Pax3,Tbx1,Wnt2,Aldh1a2,Wnt11,Sema6a,Hnnpab,Myocd,Zfp361l,Gata4,Fgf9,Vegfa,Plk7,Six2,Tcf1,Cyp26a1,Acvr1,Dab2ip,Nckap1,Pax6,Mdk,Bmp2,Wwtr1,Pitx2,Sema3c,Nos3,Sfrp1,Tbx20,Loxl2,Six4,Gbx2,Sema3f,Crb2,Pawr,Spry1,Ovol2,Fermt2,Sema6c,Zfp750,Nup133,Thbs1,Erg,Megf8,Phldb1,Foxc1,Six1,Epha3,Robo2,Tead1,Sox11,Tcf15,Foxd1,Pbld1                                          |
| BP | GO:0010464 | regulation of mesenchymal cell proliferation          | 0.0022873 | Sox9,Shh,Nfib,Tbx1,Wnt2,Wnt11,Fgf9,Trp63,Vegfa,Pdgfra,Prrx1,Lmna,Ptn,Prrx2,Six1,Irs1,Kdr                                                                                                                                                                                                                                                                                                                |
| BP | GO:0050670 | regulation of lymphocyte proliferation                | 0.0022974 | Shh,Il27ra,Mpl,Tnfrsf13b,Blk,Slamf1,H2-M3,Sdc4,Cd40,Ikzf3,Tcf3,Il6st,Cdkn1a,Cd4,Mzb1,Cd74,Cd6,Cd28,Traf6,Cd1d1,Cd38,Tacr1,Clec2i,Siglecg,Cd22,Rps3,Pycard,Cd40lg,Cd209a,Pawr,H2-Aa,Ccr7,Igfbp2,Clcf1,Ticam1,Igf2,Ccr2,Carmil2,Vtcn1,Gpr183,Spn,Btla,Rasal3,Pde5a,Sox11,Tnfrsf13c,Cd59b,H2-Ab1,Clec4g,Ighm,Lrc32,Ighd                                                                                    |
| BP | GO:0070661 | leukocyte proliferation                               | 0.0024509 | Shh,Cd79a,Il27ra,Mpl,Tnfrsf13b,Blk,Slamf6,Slamf1,H2-M3,Sdc4,Cd40,Ikzf3,Tcf3,Cd180,F2r1,Il6st,Clu,St6gal1,Cdkn1a,Cd4,Trem2,Mzb1,Cd74,Cd6,Cd28,Cr2,Traf6,Cd1d1,Rps6,Cd38,Ephb6,Tacr1,Cd27,Clec2i,Siglecg,Cd22,Cd19,Rps3,Pycard,Cd40lg,Cd209a,Il34,Pawr,H2-Aa,Crp,Ccr7,Igfbp2,Clcf1,Ticam1,Igf2,Ccr2,Carmil2,Vtcn1,Gpr183,Spn,Btla,Rasal3,Pde5a,Impdh2,Sox11,Tnfrsf13c,Cd59b,H2-Ab1,Clec4g,Ighm,Lrc32,Ighd |
| BP | GO:0006910 | phagocytosis, recognition                             | 0.0032097 | Pla2g5,Trbc2,Igkc,Ighg2c,Ighg2b,Ighg3,Ighm,Ighv14-4,Iglc2,Igha,Ighv14-2,Ighv14-3,Ighd,Igk3,Igk1                                                                                                                                                                                                                                                                                                         |
| BP | GO:0001657 | ureteric bud development                              | 0.0032097 | Sox9,Shh,Pax2,Lhx1,Sim1,Hnf1b,Wnt1,Vegfa,Six2,Kif26b,Bmp2,Smad9,Sfrp1,Slit2,Bmper,Six4,Lzts2,Smad6,Spry1,Npnt,Fmn1,Fat4,Adamts16,Foxc1,Six1,Robo2,Foxd1                                                                                                                                                                                                                                                 |
| BP | GO:0072163 | mesonephric epithelium development                    | 0.0032097 | Sox9,Shh,Pax2,Lhx1,Sim1,Hnf1b,Wnt1,Vegfa,Six2,Kif26b,Bmp2,Smad9,Sfrp1,Slit2,Bmper,Six4,Lzts2,Smad6,Spry1,Npnt,Fmn1,Fat4,Adamts16,Foxc1,Six1,Robo2,Foxd1                                                                                                                                                                                                                                                 |
| BP | GO:0072164 | mesonephric tubule development                        | 0.0032097 | Sox9,Shh,Pax2,Lhx1,Sim1,Hnf1b,Wnt1,Vegfa,Six2,Kif26b,Bmp2,Smad9,Sfrp1,Slit2,Bmper,Six4,Lzts2,Smad6,Spry1,Npnt,Fmn1,Fat4,Adamts16,Foxc1,Six1,Robo2,Foxd1                                                                                                                                                                                                                                                 |
| BP | GO:0045933 | positive regulation of muscle contraction             | 0.0043308 | Lck,Kit,Trpv4,Smtn,Myocd,Chga,Tacr1,Ctnn,Pawr,Npnt,Adra1a,Chrm3,Ptgs1,Abat,Sphk1                                                                                                                                                                                                                                                                                                                        |
| BP | GO:0045987 | positive regulation of smooth muscle contraction      | 0.0043308 | Lck,Kit,Myocd,Tacr1,Ctnn,Pawr,Npnt,Adra1a,Chrm3,Ptgs1,Abat,Sphk1                                                                                                                                                                                                                                                                                                                                        |
| BP | GO:0050921 | positive regulation of chemotaxis                     | 0.0044979 | Shh,Met,Trpv4,Slamf1,C1qbp,Ccl1,Cxcl14,F2r1,Smoc2,Vegfa,Trem2,Cd74,Cxcr2,Ppm1f,Mdk,Ptn,Swap70,Slit2,Il34,Cxcl10,Tpbp,P2ry12,Ccr7,Thbs1,Ccr6,Megf8,S1pr1,Ccr2,Ntf3,C5ar1,Dscam,Fpr2,Mospd2,Kdr                                                                                                                                                                                                           |
| BP | GO:0007200 | phospholipase C-activating G protein-coupled receptor | 0.0054211 | Chga,F2r2,F2r1,Cxcr2,P2ry1,Hcrtr2,Pth1r,Adra2a,P2ry12,Htr2c,S1pr1,Fpr1,Adra1a,C5ar1,Gpr18,Oprd1,Adra1b,P2ry10,Fpr2,P2ry10b,Gpt27,Gpr174,Fpr3                                                                                                                                                                                                                                                            |

|    |            |                                                                                                         |           |                                                                                                                                                                                                                                                                                                                                                                                                                                                                                                                                                                                                          |
|----|------------|---------------------------------------------------------------------------------------------------------|-----------|----------------------------------------------------------------------------------------------------------------------------------------------------------------------------------------------------------------------------------------------------------------------------------------------------------------------------------------------------------------------------------------------------------------------------------------------------------------------------------------------------------------------------------------------------------------------------------------------------------|
|    |            | signaling pathway                                                                                       |           |                                                                                                                                                                                                                                                                                                                                                                                                                                                                                                                                                                                                          |
| BP | GO:0042113 | B cell activation                                                                                       | 0.0063722 | Ifg2,Cd79a,I127ra,Kit,Tnfrsf13b,Blk,Cd40,Ikzf3,Mfng,Tcf3,Zfp3611,Cd180,Cdkn1a,Mzb1,Cd74,Ms4a1,Cd28,Cr2,Cdh17,Cd38,Cd27,Siglecg,Cd22,Cd19,Swap70,Cd40lg,I12rg,Sfrp1,Pou2af1,Pawr,Phb,Cd79b,C1cf1,Lat2,Ccr6,Ticam1,Cxcr5,Fzd9,Gpr183,Lax1,Btla,Txlna,Ferl1,Blnk,Tnfrsf13c,H2-Ab1,Trbc2,Igkc,Ighg2c,Ighg2b,Ighg3,Ighm,Ighv14-4,Iglc2,Gimap1,Igha,Ighv14-2,Ighv14-3,Ighd,Iglc3,Iglc1                                                                                                                                                                                                                         |
| BP | GO:0046651 | lymphocyte proliferation                                                                                | 0.0063722 | Shh,Cd79a,I127ra,Mpl,Tnfrsf13b,Blk,Slamf6,Slamf1,H2-M3,Sdc4,Cd40,Ikzf3,Tcf3,Cd180,I16st,Cdkn1a,Cd4,Mzb1,Cd74,Cd6,Cd28,Cr2,Traf6,Cd1d1,Rps6,Cd38,Ephb6,Tacr1,Cd27,Clec2i,Siglecg,Cd22,Cd19,Rps3,Pycard,Cd40lg,Cd209a,Pawr,H2-Aa,Ccr7,Igfbp2,C1cf1,Ticam1,Igf2,Ccr2,Carmil2,Vttn1,Gpr183,Spn,Btla,Rasal3,Pde5a,Impdh2,Sox11,Tnfrsf13c,Cd59b,H2-Ab1,Clec4g,Ighm,Lrrc32,Ighd                                                                                                                                                                                                                                 |
| BP | GO:0002250 | adaptive immune response                                                                                | 0.0064892 | Cd3g,Cd79a,I127ra,Fcer2a,Sh2d1a,Cd247,Tnfrsf13b,Slamf6,Slamf1,Cd48,H2-M3,Cd40,C1qbp,Irf4,Erp1,Cd4,Vegfa,Cd74,Cd28,Tnfrsf11a,Cd55,Cr2,Hc,Traf6,Cd1d1,Sit1,Ephb6,Siglecg,Ctsc,Cd19,Pycard,Swap70,Cd40lg,Bmx,Adcy7,Cd3d,Cd226,H2-Aa,H2-DMa,Crp,Ccr7,C1rl,Phb,Stx11,Cd79b,C1cf1,Lat2,Ccr6,Serpina3g,I123r,Ccr2,Vttn1,Gpr183,Spn,Lax1,Btla,Cd8b1,Cd8a,Cfi,H2-Eb1,Jchain,Tnfrsf13c,H2-Ab1,Clec4g,Trbc2,Igkv5-48,Igkc,Ighg2c,Ighg2b,Ighg3,Ighm,Ighv14-4,Iglc2,Iglv2,H2-DMb1,Lime1,Igkv12-41,Igha,Ighv14-2,Ighv14-3,Ighd,Iglc3,Iglc1                                                                             |
| BP | GO:0048565 | digestive tract development                                                                             | 0.009114  | Tcf7,Shh,Kit,Ephb3,Aldh1a2,Myocd,Hnf1b,I16st,Gata4,Fgf9,Trp63,Six2,Spdef,Pcsk5,Pdgfa,Sox17,Nckap1,Nkx2-2,Pitx2,Sfrp1,Ovol2,Alx4,Megf8,Fat4,Yipf6,Nkx3-2,Fgfr3,Acvr2b,Sox11                                                                                                                                                                                                                                                                                                                                                                                                                               |
| BP | GO:0007411 | axon guidance                                                                                           | 0.0094621 | Sema6b,Nkx2-1,Shh,Ephb3,Fzd3,Nfib,Etv4,Lhx1,Sema6a,Mypn,Unc5b,Evl,Pla2g10,Vegfa,Slit1,Ablim1,Unc5a,Nfasc,Lhx4,Lamc2,P1xna2,Lmx1a,Kif5c,Pax6,Epha8,Ephb2,Sema3c,Draxin,Rhoh,Apbb2,Ephb4,Ephb6,Slit2,Gbx2,Sema3f,Prtg,Apbb1,Sema6c,Megf8,Efna5,Ntf3,Dscam,Epha3,Robo2,Cntn2,Epha6,Unc5c,Gbx1,Kif5a,Foxd1                                                                                                                                                                                                                                                                                                   |
| BP | GO:0097485 | neuron projection guidance                                                                              | 0.0094621 | Sema6b,Nkx2-1,Shh,Ephb3,Fzd3,Nfib,Etv4,Lhx1,Sema6a,Mypn,Unc5b,Evl,Pla2g10,Vegfa,Slit1,Ablim1,Unc5a,Nfasc,Lhx4,Lamc2,P1xna2,Lmx1a,Kif5c,Pax6,Epha8,Ephb2,Sema3c,Draxin,Rhoh,Apbb2,Ephb4,Ephb6,Slit2,Gbx2,Sema3f,Prtg,Apbb1,Sema6c,Megf8,Efna5,Ntf3,Dscam,Epha3,Robo2,Cntn2,Epha6,Unc5c,Gbx1,Kif5a,Foxd1                                                                                                                                                                                                                                                                                                   |
| BP | GO:0002580 | regulation of antigen processing and presentation of peptide or polysaccharide antigen via MHC class II | 0.010745  | Trem2,H2-Oa,Pycard,Thbs1,H2-Ob                                                                                                                                                                                                                                                                                                                                                                                                                                                                                                                                                                           |
| BP | GO:0042273 | ribosomal large subunit biogenesis                                                                      | 0.0111055 | Nhp2,Ppan,Rsl1d1,Pes1,Nle1,Ftsj3,Gtpbp4,Rpl14,Nop16,Fastkd2,Nifk,Rpl6,Nip7,Rsl24d1,Surf6,Rpl10a,Nop2,Nop53,Wdr74,Npm1,Rpl5,Nsa2,Snu13                                                                                                                                                                                                                                                                                                                                                                                                                                                                    |
| BP | GO:0006936 | muscle contraction                                                                                      | 0.0185384 | Lck,Scn4a,Irag1,Kit,Trpv1,Met,Trpv4,Sulf1,Smtn,Myocd,P2rx1,Myh3,Chga,Gata4,Myom1,Htr7,Cacna1s,Snta1,Cd38,Nos1,Cald1,Tacr1,Grip2,Cttn,Myom2,Tbx20,Hcn4,Stac,Scn5a,Ank2,Myh2,Adra2a,Scn10a,Adrb1,Pawr,Myh6,Npnt,Kcnj2,Pkp2,Dsg2,Adra1a,Chrm3,Ptgs1,Lmod1,Adra1b,Cacna1c,Myh7,Pde5a,Myh8,Myh4,Abat,Sphk1,Tnnt1,Scn1a                                                                                                                                                                                                                                                                                        |
| BP | GO:0019081 | viral translation                                                                                       | 0.0199984 | Ptbp1,Eif3d,Denr,Eif3f,Eif3l,Shfl,Dhx9,Eif3b,Eif3g                                                                                                                                                                                                                                                                                                                                                                                                                                                                                                                                                       |
| BP | GO:0040017 | positive regulation of locomotion                                                                       | 0.0234142 | Fer,Alox12,Sox9,Sema6b,Col18a1,Col1a1,Itga3,Shh,Cavin1,Hmox1,Kit,Tek,Twist2,Met,Trpv4,Sash1,Slamf1,Wnt11,Cd40,C1qbp,Sparc,Sema6a,Ccl1,Cxcl14,F2r1l,I16st,Fgf9,Angpt1,Smoc2,Vegfa,Trem2,Cd74,Pcsk5,Pdgfa,Cxcr2,Ppm1f,Lamc2,Acvr1,Dab2ip,Pax6,Mdk,Fermt1,Bmp2,Egf,Fubp1,Epb41l4b,Sema3c,Nos3,Anxa3,Flt1,Ptn,Tacr1,Pycard,Swap70,Pak3,Plp1,Slit2,I134,Pgr,Bcar1,Thy1,Ets1,Syde1,Adra2a,Jcad,Itga2b,Sema3f,Cxcl10,Tpbp,Pawr,P2ry12,Phpt1,Bag4,Fermt2,Ccr7,Sema6c,Thbs1,Ccr6,Megf8,S1pr1,Fam83h,Rhoj,Igf2,Ccr2,Ntf3,C5ar1,Tmsb4x,Dscam,Synpo2,Carmil2,Spn,Fpr2,Cemip,Rras2,Irs1,Sh3rf2,Mospd2,Sphk1,Kdr,Cass4 |

|    |            |                                               |           |                                                                                                                                                                                                                                                                                                                                                                                                                                                                                                                                                                                                          |
|----|------------|-----------------------------------------------|-----------|----------------------------------------------------------------------------------------------------------------------------------------------------------------------------------------------------------------------------------------------------------------------------------------------------------------------------------------------------------------------------------------------------------------------------------------------------------------------------------------------------------------------------------------------------------------------------------------------------------|
| BP | GO:0021515 | cell differentiation in spinal cord           | 0.0235828 | Shh,Pax3,Lhx1,Wnt1,Ighmbp2,Lbx1,Lhx4,Nkx2-2,Tal1,Pax7,Draxin,Tbx20,Tctn1,Olig2,Gbx1                                                                                                                                                                                                                                                                                                                                                                                                                                                                                                                      |
| BP | GO:0060677 | ureteric bud elongation                       | 0.0268977 | Hnf1b,Kif26b,Six4,Lzts2,Fmn1,Six1                                                                                                                                                                                                                                                                                                                                                                                                                                                                                                                                                                        |
| BP | GO:0055074 | calcium ion homeostasis                       | 0.0326497 | Lck,Trpv1,Atp7b,Trpv4,Cd40,Jph2,Fam20a,Ccl1,P2rx1,Chga,F2r12,F2r11,I16st,Cd4,Tmem178,Ms4a1,Ms4a2,Cxcr2,Trpc3,P2ry1,Cd38,Nos1,Adcyap1r1,Tacr1,Slc8a2,Cd19,Swap70,Atp2b3,Trpc6,Thy1,Hcrtr2,Pth1r,Scn5a,Ank2,Trpc1,Cxcl10,Adrb1,Pawr,Trpm8,Pml,Ccr7,Ccr6,Htr2c,Trpv3,Tmem64,Npsr1,Ccr12,Ccr10,S1pr1,Fpr1,Adra1a,Cxcr5,Atp13a5,Ccr2,C5ar1,Kcnk3,Fzd9,Gpr18,Adra1b,P2ry10,Selenon,Mtn,Cacna1c,Fpr2,Cemip,P2ry10b,Grik2,Kl,Gtf2i,Xcr1,Kdr,Slc24a3,Gpr174,Fam155a,Fpr3,Lime1                                                                                                                                    |
| BP | GO:0072189 | ureter development                            | 0.0331652 | Sox9,Shh,Pax2,Aldh1a2,Lhx1,Sox17,Lzts2,Six1                                                                                                                                                                                                                                                                                                                                                                                                                                                                                                                                                              |
| BP | GO:1902656 | calcium ion import into cytosol               | 0.0400836 | Trpv1,Trpv4,P2rx1,Ms4a1,Slc8a2,Adrb1,Pawr,Trpv3,Cacna1c,Fam155a                                                                                                                                                                                                                                                                                                                                                                                                                                                                                                                                          |
| BP | GO:0048754 | branching morphogenesis of an epithelial tube | 0.0492916 | Sox9,Shh,Pax2,Tek,Tbx1,Met,Wnt2,Etv4,Lhx1,Hnf1b,Angpt1,Wnt1,Vegfa,Six2,Acvr1,Mdk,Bmp2,Egf,Pitx2,Tnc,Flt1,Col4a1,Slit2,Pgr,Tbx20,Six4,Gbx2,Pml,Spry1,Clic4,Npnt,Fat4,Adams16,Six1,Hmga2,Csmd1,Kdr,Foxd1                                                                                                                                                                                                                                                                                                                                                                                                   |
| BP | GO:0007596 | blood coagulation                             | 0.0492916 | ApoH,Tspan32,Alox12,Shh,Mertk,Blk,Plek,P2rx1,Evl,F2r12,F2r11,Enpp4,Pdgfra,F5,Slc7a11,P2ry1,Ephb2,Pf4,Cd9,Cd40lg,Adra2a,Itga2b,Hpse,P2ry12,F11r,Thbs1,Gp5,Gp1ba,Gp1bb,Mmm1,Abat,Adtrp,Mpig6b,Gp6                                                                                                                                                                                                                                                                                                                                                                                                          |
| BP | GO:2000147 | positive regulation of cell motility          | 0.0497875 | Fer,Alox12,Sox9,Sema6b,Col18a1,Col1a1,Itga3,Shh,Cavin1,Hmox1,Kit,Tek,Twist2,Met,Trpv4,Sash1,Slamf1,Wnt11,Cd40,C1qbp,Sparc,Sema6a,Ccl1,Cxcl14,F2r11,I16st,Fgf9,Angpt1,Smoc2,Vegfa,Trem2,Cd74,Pcsk5,Pdgfra,Cxcr2,Ppm1f,Lamc2,Acvr1,Dab2ip,Pax6,Mdk,Fermt1,Bmp2,Egf,Fubp1,Epb414b,Sema3c,Nos3,Anxa3,Flt1,Ptn,Tacr1,Pycard,Swap70,Pak3,Plp1,I134,Pgr,Bcar1,Thy1,Ets1,Syde1,Adra2a,Jead,Itga2b,Sema3f,Cxcl10,Pawr,P2ry12,Phpt1,Bag4,Fermt2,Ccr7,Sema6c,Thbs1,Ccr6,S1pr1,Fam83h,Rhoj,Igf2,Ccr2,Ntf3,C5ar1,Tmsb4x,Synpo2,Carmil2,Spn,Fpr2,Cemip,Rras2,Irs1,Sh3rf2,Mospd2,Sphk1,Kdr,Cass4                        |
| CC | GO:0019814 | immunoglobulin complex                        | 1.617E-10 | Cd79a,Cd79b,Jchain,Trbc2,Igkc,Ighg2c,Ighg2b,Ighg3,Ighm,Ighv14-4,Igk2,Lime1,Igha,Ighv14-2,Ighv14-3,Ighd,Igk3,Igk1                                                                                                                                                                                                                                                                                                                                                                                                                                                                                         |
| CC | GO:0042571 | immunoglobulin complex, circulating           | 2.466E-09 | Jchain,Trbc2,Igkc,Ighg2c,Ighg2b,Ighg3,Ighm,Ighv14-4,Igk2,Igha,Ighv14-2,Ighv14-3,Ighd,Igk3,Igk1                                                                                                                                                                                                                                                                                                                                                                                                                                                                                                           |
| CC | GO:0009897 | external side of plasma membrane              | 1.104E-08 | Itga3,Spa17,Cd3g,Cd79a,Prlr,I127ra,Fcer2a,Kit,Trpv1,Tnfrsf13b,Wnt2,Slamf1,Cd48,Cd83,H2-M3,Scube1,Cd40,Ace,P2rx1,I16st,Gfra2,Cd4,Cd74,Cd5,Cd6,Ms4a1,Ms4a2,Cd28,Cxcr2,Tnfrsf11a,Cd55,Cr2,Kcnj3,Cd2,Glrp,Cd1d1,Cntfr,Abcg2,Cd27,Scnn1a,Cd9,Clec2i,Cd22,Art2b,Cd19,Cd40lg,I12rg,Thy1,Cd3d,Cd226,Itga2b,Cxcl10,Stab2,Trpm8,P2ry12,H2-Aa,Ccr7,Thbs1,Cd79b,Dlk1,Ccr6,Igsf21,Htr2c,Fcgr,Ccr12,Ccr10,S1pr1,Cxcr5,Efna5,I123r,Ccr2,Gp1ba,Vtcn1,Spn,Btla,Cd8b1,Cd8a,Xcr1,Kdr,Klra7,Tnfrsf13c,Cd59b,H2-Ab1,Ly6a,Trbc2,Igkc,Ighg2c,Ighg2b,Ighg3,Ighm,Ighv14-4,Igk2,Ly6c1,Ly6g6c,Igha,Ighv14-2,Ighv14-3,Ighd,Igk3,Igk1 |
| CC | GO:0042613 | MHC class II protein complex                  | 8.56E-06  | H2-Oa,Cd74,H2-Aa,h2-DMb2,H2-DMA,H2-Ob,H2-Eb1,H2-Ab1,H2-DMb1                                                                                                                                                                                                                                                                                                                                                                                                                                                                                                                                              |
| CC | GO:0031012 | extracellular matrix                          | 0.0002059 | Col18a1,Col1a1,Ltbp1,Shh,Otog,Wnt2,Wnt11,Matn4,Sparc,Plod1,Dcn,Pxdn,Cd180,Fgf9,Angpt1,Col14a1,Adams20,Smoc2,Vegfa,Adams10,Efemp2,Col17a1,Col7a1,Col9a1,Lamc2,Ush2a,Plxna2,Lamc3,Fbln7,Col11a1,Ecm1,Tnc,Sema3c,Sparc1,Pf4,Anxa3,Sspo,Ptn,Adams9,Mfap5,Ctsc,Col4a1,Sfrp1,Slit2,Crispld2,Bmper,Rpsa,Tnxb,Lox12,Fras1,Hpse,Lrrn3,Adams2,Cpz,Tecta,P3h2,Olfml2b,Thbs1,Ltbp4,Npnt,Lad1,Lrrtm3,Egflam,Col6a6,Serpinb1a,Lrrc3b,Col6a3,Igf2,Efna5,Adams16,Lingo1,Gp1ba,Nyx,Spn,Mmm1,Frem1,Muc5b,Hmcn1,Col4a4,Col8a1,Col28a1,Ovgp1,Lrrc32,Col6a5                                                                   |
| CC | GO:0030312 | external encapsulating structure              | 0.0002059 | Col18a1,Col1a1,Ltbp1,Shh,Otog,Wnt2,Wnt11,Matn4,Sparc,Plod1,Dcn,Pxdn,Cd180,Fgf9,Angpt1,Col14a1,Adams20,Smoc2,Vegfa,Adams10,Efemp2,Col17a1,Col7a1,Col9a1,Lamc2,Ush2a,Plxna2,Lamc3,Fbln7,Col11a1,Ecm1,Tnc,Sema3c,Sparc1,Pf4,Anxa3,Sspo,Ptn,Adams9,Mfap5,Ctsc,Col4a1,Sfrp1,Slit2,Crispld2,Bmper,Rpsa,Tnxb,Lox12,Fras1,Hpse,                                                                                                                                                                                                                                                                                  |

|    |            |                                                    |           |                                                                                                                                                                                                                                                                                                                                                                                                                                                                                                                                                                                                                                                 |
|----|------------|----------------------------------------------------|-----------|-------------------------------------------------------------------------------------------------------------------------------------------------------------------------------------------------------------------------------------------------------------------------------------------------------------------------------------------------------------------------------------------------------------------------------------------------------------------------------------------------------------------------------------------------------------------------------------------------------------------------------------------------|
|    |            |                                                    |           | Lrm3,Adamts2,Cpz,Tecta,P3h2,Olfml2b,Thbs1,Ltbp4,Npnt,Lad1,Lrrtm3,Egflam,Col6a6,Serpinb1a,Lrrc3b,Col6a3,Igf2,Efna5,Adamts16,Lingo1,Gp1ba,Nyx,Spn,Mmrn1,Frem1,Muc5b,Hmcn1,Col4a4,Col8a1,Col28a1,Ovpgp1,Lrrc32,Col6a5                                                                                                                                                                                                                                                                                                                                                                                                                              |
| CC | GO:0019815 | B cell receptor complex                            | 0.0080468 | Cd79a,Cd79b,Ighm,Lime1,Ighd,Igcl                                                                                                                                                                                                                                                                                                                                                                                                                                                                                                                                                                                                                |
| CC | GO:0005840 | ribosome                                           | 0.0086856 | Mrpl2,Rps11,Mrpl49,Rps18,Rps25,Mrpl52,Mrpl58,Mrpl45,Mrpl24,Rps27a,Mrpl13,Mrps18a,Mrpl28,Mrps18b,Mrpl16,Rpl14,Mrpl44,Mrpl9,Rps20,Rps6,Elav14,Rpl22,Rpl6,Rps3,Rps4x,Rsl24d1,Mrps22,Rpsa,Mrpl15,Mrps2,Mrpl47,Mrps26,Mrpl23,Rpl10a,Abcf1,Mtg1,Rpl2211,Mrpl12,Dhx9,Mrps16,Npm1,Mrps14,Rpl5,Rpl30,Rpl18,Rpl36a-ps1,Rpl9-ps6,Rps15,Chchd1,Rps18-ps6,Rpl13a,Rps27,Rps18-ps5                                                                                                                                                                                                                                                                             |
| CC | GO:0044391 | ribosomal subunit                                  | 0.0086856 | Mrpl2,Rps11,Mrpl49,Rps18,Rps25,Mrpl52,Mrpl58,Mrpl45,Mrpl24,Rps27a,Mrpl13,Mrps18a,Mrpl28,Mrps18b,Mrpl16,Rpl14,Mrpl44,Mrpl9,Rps20,Rps6,Rpl22,Rpl6,Rps3,Rps4x,Rsl24d1,Mrps22,Rpsa,Mrpl15,Mrps2,Mrpl47,Mrps26,Mrpl23,Rpl10a,Mrpl12,Mrps16,Npm1,Mrps14,Rpl5,Rpl30,Rpl18,Rpl36a-ps1,Rpl9-ps6,Rps15,Rps18-ps6,Rpl13a,Rps27,Rps18-ps5                                                                                                                                                                                                                                                                                                                   |
| CC | GO:0005852 | eukaryotic translation initiation factor 3 complex | 0.0120607 | Eif3d,Eif3e,Eif3m,Eif3i,Eif3c,Eif3f,Eif3l,Eif3b,Eif3g                                                                                                                                                                                                                                                                                                                                                                                                                                                                                                                                                                                           |
| CC | GO:0005581 | collagen trimer                                    | 0.034634  | Col18a1,Col1a1,Dcn,Col14a1,Col17a1,Col7a1,Col9a1,Col11a1,Col4a1,Colec10,Col6a6,Col6a3,Eda,C1qtnf7,Col4a4,Col8a1,Col28a1,Col6a5                                                                                                                                                                                                                                                                                                                                                                                                                                                                                                                  |
| MF | GO:0004930 | G protein-coupled receptor activity                | 3.16E-05  | Fzd3,Npffr1,F2r2,F2r1,Slc22a22,Grm8,Htr7,Pth2r,Cxcr2,Sctr,P2ry1,Adgrl2,Adcyap1r1,Tacr1,Adgrg2,Adgrg1,Hcrr2,Pth1r,Vipr1,Cysltr2,Adra2a,Adrb1,Sigmar1,Rorb,P2ry12,Ccr7,Ccr6,Htr2c,Gpr45,Npsr1,Ccr2,Ccr10,S1pr4,Cnr1,S1pr1,Fpr1,Adra1a,Chrm3,Cxcr5,Ccr2,C5ar1,Fzd9,Gpr171,Gpr18,Oprd1,Adra1b,Prokr2,Htr1f,P2ry10,Gpr183,Fpr2,Adgrg4,P2ry10b,Adgrf5,Xcr1,Adgrg5,Sphk1,Grm4,Gpr27,Gpr174,Fpr3,Mrgpra2a,Mrgpra2b,Galr3                                                                                                                                                                                                                                |
| MF | GO:0034987 | immunoglobulin receptor binding                    | 3.16E-05  | Jchain,Trbc2,Igkc,Ighg2c,Ighg2b,Ighg3,Ighm,Ighv14-4,Igcl2,Igha,Ighv14-2,Ighv14-3,Ighd,Igcl3,Igcl1                                                                                                                                                                                                                                                                                                                                                                                                                                                                                                                                               |
| MF | GO:0023026 | MHC class II protein complex binding               | 0.0006572 | Cd4,H2-Oa,Cd74,h2-DMb2,H2-DMa,H2-Ob,H2-DMb1                                                                                                                                                                                                                                                                                                                                                                                                                                                                                                                                                                                                     |
| MF | GO:0005198 | structural molecule activity                       | 0.0006572 | Col18a1,Col1a1,Ltbp1,Mrpl2,Rps11,Hmx1,Mrpl49,Rps18,Otog,Rps25,Mrpl52,Tubb1,Pls3,Matn4,Mpp2,Sparc,Mrpl24,Dcn,Rps27a,Sntg2,Pxdn,Mrpl13,Col14a1,Mrps18a,Myom1,Mrpl28,Mrps18b,Mrpl16,Efemp2,Col17a1,Copg2,Col7a1,Rpl14,Col9a1,Lamc2,Bfsp1,Snta1,Epb4111,Col11a1,Ecm1,Mrpl9,Rps20,Tnc,Rps6,Macf1,Rpl22,Rpl6,Sspo,Mfap5,Rps3,Rps4x,Plp1,Myom2,Col4a1,Slit2,Bmper,Rsl24d1,Mrps22,Rpsa,Tnxb,Mrpl15,Fras1,Nup54,Mrps2,Rims2,Mrpl47,Shank2,Tecta,Mrpl23,Rpl10a,Rpl2211,Nup133,Mrpl12,Thbs1,Dnm3,Ltbp4,Npnt,Lad1,Jph1,Col6a6,Ncmap,Col6a3,Mrps16,Krt15,Mmrn1,Mrps14,Rpl5,Rpl30,Rpl18,Rpl9-ps6,Rps15,Hmcn1,Col4a4,Tuba3a,Col8a1,Col28a1,Rpl13a,Rps27,Col6a5 |
| MF | GO:0003823 | antigen binding                                    | 0.002456  | Lck,Cd48,H2-M3,Cd40,Cd1d1,H2-Aa,Jchain,H2-Ab1,Trbc2,Igkc,Ighg2c,Ighg2b,Ighg3,Ighm,Ighv14-4,Igcl2,Igha,Ighv14-2,Ighv14-3,Ighd,Igcl3,Igcl1                                                                                                                                                                                                                                                                                                                                                                                                                                                                                                        |
| MF | GO:0022836 | gated channel activity                             | 0.0039237 | Scn4a,Trpv1,Gabrb2,Gabra1,Trpv4,Kcnq2,Hcn2,Gabrg2,P2rx1,Hcn1,Clic6,Scn8a,Clic5,Ccdc51,Gria4,Cacna1s,Kcnj3,Pex51,Trpc3,Glrb,Gpr89,Gabra4,Scnn1a,Tmc5,Kcnu1,Grik4,Hcn4,Scn5a,Gabrb3,Kcnk1,Kcnh5,Scn10a,Tmem109,Trpm8,Kcnk9,Clic4,Ano2,Grid1,Kcnj2,Kcnj4,Cnr1,Kcnk3,Cacna1c,Kcnj16,Gabra5,Cla3a1,Grik2,Scn3a,Kcng2,Kcnd2,Atp5g2,Hvcn1,Scn1a,Cacng3,Fam155a,Kcnb2                                                                                                                                                                                                                                                                                   |
| MF | GO:0005539 | glycosaminoglycan binding                          | 0.0039237 | Aph1,Shh,Sulf1,C1qbp,Dcn,Habp4,Fgf9,Nell2,Fgf12,Fstl1,Smoc2,Vegfa,Trem2,Dpsyl3,Efemp2,Slit1,Lamc2,Mdk,Fbln7,Col11a1,Rspo1,Rpl22,Pf4,Ptn,Sfrp1,Slit2,Adgrg1,Crispld2,Rspo4,Tnxb,Cxcl10,Stab2,Thbs1,Pla2g5,Stab1,Egflam,Cemip,Lipg,Jchain                                                                                                                                                                                                                                                                                                                                                                                                         |
| MF | GO:0001653 | peptide receptor activity                          | 0.0074053 | F2r2,F2r1,Pth2r,Cxcr2,Sctr,Adcyap1r1,Tacr1,Hcrr2,Pth1r,Vipr1,Cysltr2,Sigmar1,Ccr7,Ccr6,Npsr1,Ccr2,Ccr10,Fpr1,Cxcr5,Ccr2,Oprd1,Prokr2,Fpr2,Xcr1,Fpr3,Galr3                                                                                                                                                                                                                                                                                                                                                                                                                                                                                       |
| MF | GO:0005216 | ion channel activity                               | 0.0294758 | Scn4a,Atp5d,Trpv1,Gabrb2,Gabra1,Trpv4,Kcnq2,Slc1a4,Best3,Hcn2,Gabrg2,P2rx1,Hcn1,Clic6,Scn8a,Clic5,Ccdc51,Gria4,Cacna1s,Kcnj3,Pex51,Trpc3,Glrb,Gpr89,Gabra4,Scnn1a,Tmc5,Kcnu1,Trpc6,Grik4,Tmem266,Hcn4,Scn5a,Trpc1,Gabrb3,Kcnk1,Kcnh5,Scn10a,Trpm8,Kcnk9,Clic4,Ano2,Abcc8,Grid1,Kcnj2,Kcnj12,Trpv3,Kcnj4,Cnr1,Calhm6,Kcnk3,Cacna1c,Kcnj16,Gabra5,Ano5,Cla3a1,Grik2,Scn3a,Kcng2,Kcnd2,Slc24a3,Hvcn1,Scn1a,Cacng3,Fam155a,Kcnb2                                                                                                                                                                                                                    |



|    |            |                         |           |                                                                              |
|----|------------|-------------------------|-----------|------------------------------------------------------------------------------|
| MF | GO:0005272 | sodium channel activity | 0.0463998 | Scn4a,Hcn2,Hcn1,Scn8a,Scnn1a,Grik4,Hcn4,Scn5a,Kcnk1,Scn10a,Grik2,Scn3a,Scn1a |
|----|------------|-------------------------|-----------|------------------------------------------------------------------------------|

**Supplementary Table 4 (A):** KEGG pathway analysis of differentially expressed genes in LD group using the clusterProfiler R package for determining functions of the DEGs based on BH adjusted p-values (adjusted p-value for multiple testing calculated using Benjamin-Hochberg correction method).

| Column Header      | Description                                                                                                                                                      |
|--------------------|------------------------------------------------------------------------------------------------------------------------------------------------------------------|
| <b>ID</b>          | Pathway ID                                                                                                                                                       |
| <b>Description</b> | Pathway Description                                                                                                                                              |
| <b>Count</b>       | No. of Genes involved in the pathway.                                                                                                                            |
| <b>GeneRatio</b>   | k/n                                                                                                                                                              |
|                    | k = size of the 'overlap of 'a vecto' of gene id' you input with the specific geneset (the number of genes within that list n, which are annotated to the node). |
|                    | n = size of the 'overlap of 'a vecto' of gene id' you input with all the members of the collection of genesets (is the size of the list of genes of interest).   |
| <b>BgRatio</b>     | M/N                                                                                                                                                              |
|                    | M = size of the geneset (is the number of genes within that distribution that are annotated (either directly or indirectly) to the node of interest).            |
|                    | N = size of all of the unique genes in the collection of genesets is the total number of genes in the background distribution (Universe).                        |
| <b>pvalue</b>      | To examine the significance of pathway-term enrichment                                                                                                           |
| <b>p.adjust</b>    | BH adjusted p-values (adjusted p-value for multiple testing calculated using Benjamin-Hochberg correction method)                                                |
| <b>geneID</b>      | Entrez gene Id                                                                                                                                                   |

| KEGG pathway analysis of Control vs LD (p.adjust <0.05) |                                              |           |         |            |          |                                |       |
|---------------------------------------------------------|----------------------------------------------|-----------|---------|------------|----------|--------------------------------|-------|
| ID                                                      | Description                                  | GeneRatio | BgRatio | pvalue     | p.adjust | geneID                         | Count |
| mmu05340                                                | Primary immunodeficiency                     | 4/38      | 32/6029 | 4.2525E-05 | 0.002521 | 12518/12265/17060/72049        | 4     |
| mmu04672                                                | Intestinal immune network for IgA production | 4/38      | 36/6029 | 6.8412E-05 | 0.002521 | 15002/381091/72049/14961       | 4     |
| mmu05150                                                | Staphylococcus aureus infection              | 4/38      | 36/6029 | 6.8412E-05 | 0.002521 | 15002/14289/381091/14961       | 4     |
| mmu04612                                                | Antigen processing and presentation          | 5/38      | 73/6029 | 8.334E-05  | 0.002521 | 12265/16149/15002/381091/14961 | 5     |
| mmu05310                                                | Asthma                                       | 3/38      | 18/6029 | 0.00017662 | 0.004274 | 15002/381091/14961             | 3     |

|          |                                                     |      |          |            |          |                                        |   |
|----------|-----------------------------------------------------|------|----------|------------|----------|----------------------------------------|---|
| mmu05322 | Systemic lupus erythematosus                        | 5/38 | 99/6029  | 0.00035232 | 0.007105 | 20822/15002/381091/100041230/14961     | 5 |
| mmu04514 | Cell adhesion molecules                             | 5/38 | 126/6029 | 0.00106321 | 0.018378 | 20971/16456/15002/381091/14961         | 5 |
| mmu05169 | Epstein-Barr virus infection                        | 6/38 | 196/6029 | 0.00126611 | 0.01915  | 14128/12575/15002/17060/381091/14961   | 6 |
| mmu04640 | Hematopoietic cell lineage                          | 4/38 | 83/6029  | 0.00172653 | 0.023212 | 14128/15002/381091/14961               | 4 |
| mmu05152 | Tuberculosis                                        | 5/38 | 146/6029 | 0.00204938 | 0.024797 | 12265/16149/15002/381091/14961         | 5 |
| mmu05330 | Allograft rejection                                 | 3/38 | 45/6029  | 0.00273143 | 0.027079 | 15002/381091/14961                     | 3 |
| mmu05332 | Graft-versus-host disease                           | 3/38 | 45/6029  | 0.00273143 | 0.027079 | 15002/381091/14961                     | 3 |
| mmu05320 | Autoimmune thyroid disease                          | 3/38 | 46/6029  | 0.00290935 | 0.027079 | 15002/381091/14961                     | 3 |
| mmu05321 | Inflammatory bowel disease                          | 3/38 | 49/6029  | 0.00348548 | 0.029569 | 15002/381091/14961                     | 3 |
| mmu05145 | Toxoplasmosis                                       | 4/38 | 102/6029 | 0.00366553 | 0.029569 | 12265/15002/381091/14961               | 4 |
| mmu04940 | Type I diabetes mellitus                            | 3/38 | 52/6029  | 0.00412695 | 0.03121  | 15002/381091/14961                     | 3 |
| mmu05140 | Leishmaniasis                                       | 3/38 | 63/6029  | 0.00707106 | 0.047533 | 15002/381091/14961                     | 3 |
| mmu05323 | Rheumatoid arthritis                                | 3/38 | 63/6029  | 0.00707106 | 0.047533 | 15002/381091/14961                     | 3 |
| mmu05164 | Influenza A                                         | 4/38 | 130/6029 | 0.00864008 | 0.055024 | 12265/15002/381091/14961               | 4 |
| mmu05416 | Viral myocarditis                                   | 3/38 | 70/6029  | 0.00945696 | 0.057215 | 15002/381091/14961                     | 3 |
| mmu05166 | Human T-cell leukemia virus 1 infection             | 5/38 | 214/6029 | 0.01038877 | 0.059859 | 12575/15002/381091/72049/14961         | 5 |
| mmu04662 | B cell receptor signaling pathway                   | 3/38 | 79/6029  | 0.01314186 | 0.07228  | 12518/15985/17060                      | 3 |
| mmu04658 | Th1 and Th2 cell differentiation                    | 3/38 | 82/6029  | 0.01452856 | 0.076433 | 15002/381091/14961                     | 3 |
| mmu04659 | Th17 cell differentiation                           | 3/38 | 93/6029  | 0.02030498 | 0.102371 | 15002/381091/14961                     | 3 |
| mmu05216 | Thyroid cancer                                      | 2/38 | 36/6029  | 0.02129919 | 0.103088 | 12575/18510                            | 2 |
| mmu05168 | Herpes simplex virus 1 infection                    | 6/38 | 370/6029 | 0.02667825 | 0.124156 | 208292/16149/15002/232855/381091/14961 | 6 |
| mmu05218 | Melanoma                                            | 2/38 | 61/6029  | 0.05609612 | 0.247569 | 12575/18590                            | 2 |
| mmu04145 | Phagosome                                           | 3/38 | 140/6029 | 0.05728861 | 0.247569 | 15002/381091/14961                     | 3 |
| mmu04115 | p53 signaling pathway                               | 2/38 | 64/6029  | 0.06107973 | 0.25485  | 64058/12575                            | 2 |
| mmu05214 | Glioma                                              | 2/38 | 67/6029  | 0.06621048 | 0.267049 | 12575/18590                            | 2 |
| mmu05202 | Transcriptional misregulation in cancer             | 3/38 | 155/6029 | 0.07310355 | 0.28534  | 12575/18590/18510                      | 3 |
| mmu04512 | ECM-receptor interaction                            | 2/38 | 78/6029  | 0.08617167 | 0.322373 | 20971/243816                           | 2 |
| mmu00340 | Histidine metabolism                                | 1/38 | 15/6029  | 0.09058422 | 0.322373 | 140483                                 | 1 |
| mmu04950 | Maturity onset diabetes of the young                | 1/38 | 15/6029  | 0.09058422 | 0.322373 | 20526                                  | 1 |
| mmu04928 | Parathyroid hormone synthesis, secretion and action | 2/38 | 85/6029  | 0.09970861 | 0.344707 | 12575/110385                           | 2 |

|          |                                                                           |      |          |            |          |                    |   |
|----------|---------------------------------------------------------------------------|------|----------|------------|----------|--------------------|---|
| mmu04064 | NF-kappa B signaling pathway                                              | 2/38 | 91/6029  | 0.11175848 | 0.36548  | 17060/72049        | 2 |
| mmu05215 | Prostate cancer                                                           | 2/38 | 91/6029  | 0.11175848 | 0.36548  | 12575/18590        | 2 |
| mmu00532 | Glycosaminoglycan b-synthesis -<br>chondroitin sulfate / dermatan sulfate | 1/38 | 20/6029  | 0.11896388 | 0.378806 | 53374              | 1 |
| mmu04392 | Hippo signal-ng pathway - multiple species                                | 1/38 | 24/6029  | 0.14104498 | 0.437601 | 21678              | 1 |
| mmu01040 | Biosynthesis of unsaturated fatty acids                                   | 1/38 | 26/6029  | 0.15188252 | 0.459445 | 20249              | 1 |
| mmu04611 | Platelet activation                                                       | 2/38 | 112/6029 | 0.15653795 | 0.461978 | 19224/243816       | 2 |
| mmu04630 | JAK-STAT signaling pathway                                                | 2/38 | 114/6029 | 0.16097338 | 0.463757 | 12575/18590        | 2 |
| mmu00230 | Purine metabolism                                                         | 2/38 | 120/6029 | 0.1744191  | 0.479653 | 110385/242202      | 2 |
| mmu05418 | Fluid shear stress and atherosclerosis                                    | 2/38 | 120/6029 | 0.1744191  | 0.479653 | 20971/18590        | 2 |
| mmu00590 | Arachidonic acid metabolism                                               | 1/38 | 33/6029  | 0.18877549 | 0.507596 | 19224              | 1 |
| mmu04973 | Carbohydrate digestion and absorption                                     | 1/38 | 35/6029  | 0.19902613 | 0.512386 | 20526              | 1 |
| mmu05219 | Bladder cancer                                                            | 1/38 | 35/6029  | 0.19902613 | 0.512386 | 12575              | 1 |
| mmu04930 | Type II diabetes mellitus                                                 | 1/38 | 40/6029  | 0.22410407 | 0.564929 | 20526              | 1 |
| mmu05206 | MicroRNAs in cancer                                                       | 2/38 | 149/6029 | 0.24145788 | 0.567586 | 12575/18590        | 2 |
| mmu04610 | Complement and coagulation cascades                                       | 1/38 | 44/6029  | 0.24361441 | 0.567586 | 18788              | 1 |
| mmu04923 | Regulation of lipolysis in adipocytes                                     | 1/38 | 45/6029  | 0.24841686 | 0.567586 | 19224              | 1 |
| mmu04024 | cAMP signaling pathway                                                    | 2/38 | 159/6029 | 0.26499342 | 0.567586 | 110385/243764      | 2 |
| mmu04613 | Neutrophil extracellular trap formation                                   | 2/38 | 159/6029 | 0.26499342 | 0.567586 | 14289/100041230    | 2 |
| mmu04918 | Thyroid hormone synthesis                                                 | 1/38 | 49/6029  | 0.26733149 | 0.567586 | 18510              | 1 |
| mmu04151 | PI3K-Akt signaling pathway                                                | 3/38 | 288/6029 | 0.27196976 | 0.567586 | 12575/18590/243764 | 3 |
| mmu04061 | Viral protein interaction with cytokine and<br>cytokine receptor          | 1/38 | 50/6029  | 0.27198724 | 0.567586 | 12458              | 1 |
| mmu05217 | Basal cell carcinoma                                                      | 1/38 | 50/6029  | 0.27198724 | 0.567586 | 12575              | 1 |
| mmu04060 | Cytokine-cytokine receptor interaction                                    | 2/38 | 162/6029 | 0.27206584 | 0.567586 | 12458/72049        | 2 |
| mmu04080 | Neuroactive ligand-receptor interaction                                   | 2/38 | 165/6029 | 0.27913905 | 0.572472 | 243764/14289       | 2 |
| mmu03320 | PPAR signaling pathway                                                    | 1/38 | 53/6029  | 0.28578233 | 0.573924 | 20249              | 1 |
| mmu05205 | Proteoglycans in cancer                                                   | 2/38 | 175/6029 | 0.30269118 | 0.573924 | 20971/12575        | 2 |
| mmu01212 | Fatty acid metabolism                                                     | 1/38 | 58/6029  | 0.30821051 | 0.573924 | 20249              | 1 |
| mmu04924 | Renin secretion                                                           | 1/38 | 58/6029  | 0.30821051 | 0.573924 | 12722              | 1 |
| mmu05213 | Endometrial cancer                                                        | 1/38 | 58/6029  | 0.30821051 | 0.573924 | 12575              | 1 |
| mmu04917 | Prolactin signaling pathway                                               | 1/38 | 61/6029  | 0.32133665 | 0.573924 | 20526              | 1 |

|          |                                           |      |          |            |          |                 |   |
|----------|-------------------------------------------|------|----------|------------|----------|-----------------|---|
| mmu04721 | Synaptic vesicle cycle                    | 1/38 | 62/6029  | 0.3256579  | 0.573924 | 116837          | 1 |
| mmu04020 | Calcium signaling pathway                 | 2/38 | 186/6029 | 0.32847758 | 0.573924 | 18590/243764    | 2 |
| mmu05230 | Central carbon metabolism in cancer       | 1/38 | 64/6029  | 0.33422017 | 0.573924 | 20526           | 1 |
| mmu04810 | Regulation of actin cytoskeleton          | 2/38 | 191/6029 | 0.3401307  | 0.573924 | 18590/243764    | 2 |
| mmu04972 | Pancreatic secretion                      | 1/38 | 66/6029  | 0.34267655 | 0.573924 | 12722           | 1 |
| mmu05211 | Renal cell carcinoma                      | 1/38 | 68/6029  | 0.35102832 | 0.573924 | 12575           | 1 |
| mmu04911 | Insulin secretion                         | 1/38 | 69/6029  | 0.35516536 | 0.573924 | 20526           | 1 |
| mmu01524 | Platinum drug resistance                  | 1/38 | 70/6029  | 0.35927672 | 0.573924 | 12575           | 1 |
| mmu05223 | Non-small cell lung cancer                | 1/38 | 70/6029  | 0.35927672 | 0.573924 | 12575           | 1 |
| mmu05203 | Viral carcinogenesis                      | 2/38 | 201/6029 | 0.36326599 | 0.573924 | 12575/100041230 | 2 |
| mmu01521 | EGFR tyrosine kinase inhibitor resistance | 1/38 | 74/6029  | 0.37546843 | 0.573924 | 18590           | 1 |
| mmu05220 | Chronic myeloid leukemia                  | 1/38 | 74/6029  | 0.37546843 | 0.573924 | 12575           | 1 |
| mmu04974 | Protein digestion and absorption          | 1/38 | 75/6029  | 0.37945369 | 0.573924 | 12831           | 1 |
| mmu05032 | Morphine addiction                        | 1/38 | 75/6029  | 0.37945369 | 0.573924 | 110385          | 1 |
| mmu05212 | Pancreatic cancer                         | 1/38 | 75/6029  | 0.37945369 | 0.573924 | 12575           | 1 |
| mmu04540 | Gap junction                              | 1/38 | 78/6029  | 0.39126146 | 0.584477 | 18590           | 1 |
| mmu04012 | ErbB signaling pathway                    | 1/38 | 81/6029  | 0.40285036 | 0.59445  | 12575           | 1 |
| mmu04726 | Serotonergic synapse                      | 1/38 | 84/6029  | 0.41422433 | 0.594982 | 19224           | 1 |
| mmu05210 | Colorectal cancer                         | 1/38 | 85/6029  | 0.41796856 | 0.594982 | 12575           | 1 |
| mmu05222 | Small cell lung cancer                    | 1/38 | 85/6029  | 0.41796856 | 0.594982 | 12575           | 1 |
| mmu01522 | Endocrine resistance                      | 1/38 | 87/6029  | 0.42538725 | 0.594982 | 12575           | 1 |
| mmu04922 | Glucagon signaling pathway                | 1/38 | 88/6029  | 0.42906199 | 0.594982 | 20526           | 1 |
| mmu04670 | Leukocyte transendothelial migration      | 1/38 | 89/6029  | 0.43271384 | 0.594982 | 16456           | 1 |
| mmu05231 | Choline metabolism in cancer              | 1/38 | 93/6029  | 0.44709514 | 0.607848 | 18590           | 1 |
| mmu04066 | HIF-1 signaling pathway                   | 1/38 | 95/6029  | 0.45415205 | 0.60852  | 12575           | 1 |
| mmu04725 | Cholinergic synapse                       | 1/38 | 96/6029  | 0.45764754 | 0.60852  | 243764          | 1 |
| mmu04931 | Insulin resistance                        | 1/38 | 98/6029  | 0.46457325 | 0.611015 | 20526           | 1 |
| mmu04152 | AMPK signaling pathway                    | 1/38 | 113/6029 | 0.51384119 | 0.650598 | 20249           | 1 |
| mmu04110 | Cell cycle                                | 1/38 | 116/6029 | 0.52315088 | 0.650598 | 12575           | 1 |
| mmu04068 | FoxO signaling pathway                    | 1/38 | 117/6029 | 0.52621536 | 0.650598 | 12575           | 1 |
| mmu05224 | Breast cancer                             | 1/38 | 120/6029 | 0.53529419 | 0.650598 | 12575           | 1 |

|          |                                                   |      |          |            |          |                   |   |
|----------|---------------------------------------------------|------|----------|------------|----------|-------------------|---|
| mmu05226 | Gastric cancer                                    | 1/38 | 120/6029 | 0.53529419 | 0.650598 | 12575             | 1 |
| mmu05200 | Pathways in cancer                                | 3/38 | 444/6029 | 0.53804723 | 0.650598 | 12575/18590/18510 | 3 |
| mmu04380 | Osteoclast differentiation                        | 1/38 | 122/6029 | 0.54125239 | 0.650598 | 17060             | 1 |
| mmu05162 | Measles                                           | 1/38 | 123/6029 | 0.54420354 | 0.650598 | 27218             | 1 |
| mmu05160 | Hepatitis C                                       | 1/38 | 126/6029 | 0.55294649 | 0.650598 | 12575             | 1 |
| mmu04934 | Cushing syndrome                                  | 1/38 | 127/6029 | 0.55582436 | 0.650598 | 12575             | 1 |
| mmu04723 | Retrograde endocannabinoid signaling              | 1/38 | 128/6029 | 0.55868418 | 0.650598 | 116837            | 1 |
| mmu04921 | Oxytocin signaling pathway                        | 1/38 | 131/6029 | 0.5671565  | 0.650598 | 12575             | 1 |
| mmu04072 | Phospholipase D signaling pathway                 | 1/38 | 132/6029 | 0.56994525 | 0.650598 | 18590             | 1 |
| mmu04390 | Hippo signaling pathway                           | 1/38 | 132/6029 | 0.56994525 | 0.650598 | 21678             | 1 |
| mmu04530 | Tight junction                                    | 1/38 | 137/6029 | 0.58362866 | 0.659439 | 16456             | 1 |
| mmu05161 | Hepatitis B                                       | 1/38 | 140/6029 | 0.59163423 | 0.659439 | 12575             | 1 |
| mmu04022 | cGMP-PKG signaling pathway                        | 1/38 | 142/6029 | 0.5968878  | 0.659439 | 242202            | 1 |
| mmu04062 | Chemokine signaling pathway                       | 1/38 | 143/6029 | 0.59948985 | 0.659439 | 12458             | 1 |
| mmu05225 | Hepatocellular carcinoma                          | 1/38 | 147/6029 | 0.60973548 | 0.664667 | 12575             | 1 |
| mmu05034 | Alcoholism                                        | 1/38 | 150/6029 | 0.61725177 | 0.666233 | 100041230         | 1 |
| mmu04218 | Cellular senescence                               | 1/38 | 152/6029 | 0.62218413 | 0.666233 | 12575             | 1 |
| mmu05167 | Kaposi sarcoma-associated herpesvirus infection   | 1/38 | 172/6029 | 0.6682245  | 0.709256 | 12575             | 1 |
| mmu04015 | Rap1 signaling pathway                            | 1/38 | 184/6029 | 0.69317559 | 0.723024 | 18590             | 1 |
| mmu04510 | Focal adhesion                                    | 1/38 | 186/6029 | 0.69715246 | 0.723024 | 18590             | 1 |
| mmu04014 | Ras signaling pathway                             | 1/38 | 187/6029 | 0.69912203 | 0.723024 | 18590             | 1 |
| mmu05208 | Chemical carcinogenesis - reactive oxygen species | 1/38 | 197/6029 | 0.7181442  | 0.736402 | 57344             | 1 |
| mmu05163 | Human cytomegalovirus infection                   | 1/38 | 201/6029 | 0.72542061 | 0.737613 | 12575             | 1 |
| mmu04010 | MAPK signaling pathway                            | 1/38 | 260/6029 | 0.81370221 | 0.820483 | 18590             | 1 |
| mmu05165 | Human papillomavirus infection                    | 1/38 | 297/6029 | 0.85422635 | 0.854226 | 12575             | 1 |

**Supplementary Table 4 (B):** KEGG pathway analysis of differentially expressed genes in HD group using the clusterProfiler R package for determining functions of the DEGs based on BH adjusted p-values (adjusted p-value for multiple testing calculated using Benjamin-Hochberg correction method).

| KEGG pathway analysis of Control vs HD (p.adjust<0.05) |                                                               |           |          |             |             |                                                                                                                                                                                                                                                                                                          |       |
|--------------------------------------------------------|---------------------------------------------------------------|-----------|----------|-------------|-------------|----------------------------------------------------------------------------------------------------------------------------------------------------------------------------------------------------------------------------------------------------------------------------------------------------------|-------|
| ID                                                     | Description                                                   | GeneRatio | BgRatio  | pvalue      | p.adjust    | geneID                                                                                                                                                                                                                                                                                                   | Count |
| mmu04640                                               | Hematopoietic cell lineage                                    | 33/807    | 79/5862  | 7.03353E-10 | 2.27183E-07 | 16400/12502/14128/16590/12504/15001/12507/12482/16178/13136/12902/12481/12479/12494/12527/12483/12478/12500/16399/14960/15000/14998/15002/14729/14723/14724/12526/12525/14969/381091/333883/14961/14999                                                                                                  | 33    |
| mmu05310                                               | Asthma                                                        | 12/807    | 15/5862  | 1.31414E-08 | 2.12234E-06 | 21939/15001/14126/21947/14960/15000/14998/15002/14969/381091/14961/14999                                                                                                                                                                                                                                 | 12    |
| mmu04080                                               | Neuroactive ligand-receptor interaction                       | 48/807    | 158/5862 | 3.39042E-08 | 3.65035E-06 | 19116/193034/14401/14394/237362/14406/18436/14064/14063/14823/15566/14802/213527/319229/15139/18441/14658/14397/11517/21336/110637/387285/19228/22354/70086/14402/11551/11554/14803/15560/13611/12801/13609/14293/11549/12671/12273/18386/11548/15557/78826/14289/213438/110886/14806/268934/14294/14429 | 48    |
| mmu05150                                               | Staphylococcus aureus infection                               | 19/807    | 39/5862  | 1.61463E-07 | 1.30381E-05 | 16415/17174/15001/15139/14960/15000/14998/15002/14293/12273/14289/16665/12630/14969/225256/381091/14961/14999/14294                                                                                                                                                                                      | 19    |
| mmu04672                                               | Intestinal immune network for IgA production                  | 15/807    | 33/5862  | 9.81823E-06 | 0.00056931  | 57916/21939/15001/12487/21947/14960/15000/14998/15002/12777/14969/381091/72049/14961/14999                                                                                                                                                                                                               | 15    |
| mmu03010                                               | Ribosome                                                      | 37/807    | 132/5862 | 1.05754E-05 | 0.00056931  | 27398/27207/20084/75617/67707/78294/68537/68565/68611/94063/67115/78523/67427/20104/19934/19988/27050/20102/225215/16785/27395/118451/19935/19896/68028/56282/66483/66242/100043813/64659/100503670/19946/19899/20054/22121/100040298/57294                                                              | 37    |
| mmu04060                                               | Cytokine-cytokine receptor interaction                        | 39/807    | 149/5862 | 3.49177E-05 | 0.00150366  | 13608/19116/50931/17480/57916/21939/20308/20290/57266/16195/12504/85030/16178/12765/21934/11477/12156/12804/57349/56744/21940/21947/16186/76527/12163/15945/16324/12775/56708/12458/12777/12145/209590/12772/239114/13607/23832/11481/72049                                                              | 39    |
| mmu04512                                               | ECM-receptor interaction                                      | 24/807    | 75/5862  | 3.72424E-05 | 0.00150366  | 12842/16400/20971/16419/12839/16782/23928/21923/12826/81877/16399/231470/21825/114249/245026/14729/12835/14723/14724/64176/329872/12829/243816/665033                                                                                                                                                    | 24    |
| mmu05340                                               | Primary immunodeficiency                                      | 14/807    | 33/5862  | 5.05408E-05 | 0.001813854 | 16818/12518/57916/21939/12265/12504/12478/21947/16186/12500/12526/12525/17060/72049                                                                                                                                                                                                                      | 14    |
| mmu04514                                               | Cell adhesion molecules                                       | 31/807    | 123/5862 | 0.000450451 | 0.014549569 | 16415/15896/69524/14991/20971/21939/12504/15001/12511/12487/269116/12481/12483/21947/245537/54725/225825/14960/15000/14998/16456/15002/242122/20737/21367/12526/12525/14969/381091/14961/14999                                                                                                           | 31    |
| mmu04061                                               | Viral protein interaction with cytokine and cytokine receptor | 16/807    | 49/5862  | 0.000565451 | 0.016603709 | 20308/20290/57266/16195/12765/57349/56744/16186/76527/15945/12775/12458/12777/12145/12772/23832                                                                                                                                                                                                          | 16    |
| mmu05322                                               | Systemic lupus erythematosus                                  | 25/807    | 95/5862  | 0.000798014 | 0.021479867 | 21939/20822/15001/12487/15139/21947/14960/15000/14998/15002/326619/14969/319155/319184/15267/381091/319164/319157/665622/100041230/665596/14961/14999/319187/319189                                                                                                                                      | 25    |
| mmu04940                                               | Type I diabetes mellitus                                      | 15/807    | 50/5862  | 0.002194035 | 0.052513486 | 14991/15001/12487/19275/14960/15000/14998/12876/15002/14969/15893/381091/14415/14961/14999                                                                                                                                                                                                               | 15    |

|          |                                         |        |          |             |             |                                                                                                                                                                                                                                |    |
|----------|-----------------------------------------|--------|----------|-------------|-------------|--------------------------------------------------------------------------------------------------------------------------------------------------------------------------------------------------------------------------------|----|
| mmu05323 | Rheumatoid arthritis                    | 17/807 | 60/5862  | 0.002276126 | 0.052513486 | 16415/11433/21687/11600/22339/15001/12487/21934/14254/14960/15000/14998/15002/14969/381091/14961/14999                                                                                                                         | 17 |
| mmu04727 | GABAergic synapse                       | 19/807 | 72/5862  | 0.003165204 | 0.068157396 | 14401/76257/14394/57138/432530/14406/12292/14397/57436/11513/14681/14697/66066/14402/22348/12288/110886/268860/14415                                                                                                           | 19 |
| mmu05330 | Allograft rejection                     | 13/807 | 43/5862  | 0.003942054 | 0.079580216 | 14991/21939/15001/12487/21947/14960/15000/14998/15002/14969/381091/14961/14999                                                                                                                                                 | 13 |
| mmu04659 | Th17 cell differentiation               | 22/807 | 92/5862  | 0.005775357 | 0.102375726 | 16818/12502/50931/12503/20183/16364/16195/12504/18037/15001/16186/12500/14960/15000/14998/15002/209590/19094/14969/381091/14961/14999                                                                                          | 22 |
| mmu01040 | Biosynthesis of unsaturated fatty acids | 9/807  | 26/5862  | 0.005924732 | 0.102375726 | 74559/56473/66775/83603/20249/170439/217698/30963/26897                                                                                                                                                                        | 9  |
| mmu05320 | Autoimmune thyroid disease              | 13/807 | 45/5862  | 0.006052803 | 0.102375726 | 14991/21939/15001/12487/21947/14960/15000/14998/15002/14969/381091/14961/14999                                                                                                                                                 | 13 |
| mmu04612 | Antigen processing and presentation     | 18/807 | 71/5862  | 0.006339054 | 0.102375726 | 14991/12265/12504/15001/16149/65972/14960/15000/14998/15002/12526/12525/14969/381091/14961/14999/15511/193740                                                                                                                  | 18 |
| mmu05416 | Viral myocarditis                       | 17/807 | 68/5862  | 0.009103436 | 0.140019521 | 16415/14991/21939/15001/12487/13136/21947/14960/15000/14998/17888/15002/140781/14969/381091/14961/14999                                                                                                                        | 17 |
| mmu04610 | Complement and coagulation cascades     | 12/807 | 44/5862  | 0.013292045 | 0.189492327 | 16415/14064/12759/17174/13136/14067/12902/15139/12273/12630/333883/20701                                                                                                                                                       | 12 |
| mmu04742 | Taste transduction                      | 11/807 | 39/5862  | 0.013493262 | 0.189492327 | 14394/18441/14397/20276/330953/12671/15557/12288/110886/20269/268934                                                                                                                                                           | 11 |
| mmu04658 | Th1 and Th2 cell differentiation        | 18/807 | 77/5862  | 0.015013064 | 0.202050821 | 16818/12502/12503/12504/18037/15001/16186/12500/14960/15000/14998/15002/19094/14969/433586/381091/14961/14999                                                                                                                  | 18 |
| mmu05033 | Nicotine addiction                      | 9/807  | 30/5862  | 0.016331007 | 0.210996617 | 14401/14394/14406/14802/14397/140919/14402/22348/110886                                                                                                                                                                        | 9  |
| mmu05332 | Graft-versus-host disease               | 11/807 | 42/5862  | 0.023446043 | 0.291271994 | 14991/15001/12487/14960/15000/14998/15002/14969/381091/14961/14999                                                                                                                                                             | 11 |
| mmu05217 | Basal cell carcinoma                    | 12/807 | 48/5862  | 0.026191978 | 0.313333658 | 21414/107986/20423/14365/22413/22411/23805/22408/12575/12156/14371/21415                                                                                                                                                       | 12 |
| mmu04360 | Axon guidance                           | 31/807 | 160/5862 | 0.028240312 | 0.325772166 | 20359/20423/13845/14365/17295/20358/107449/20562/226251/107448/18845/22065/13842/13844/20348/231148/13846/13848/18481/20563/22068/22063/20350/20360/241656/13640/13837/268902/13840/22253/98932                                | 31 |
| mmu05171 | Coronavi–us disease - COVID-19          | 35/807 | 186/5862 | 0.030910472 | 0.344278703 | 50528/54131/27207/20084/75617/78294/11421/16195/17174/72512/67115/15139/22034/67427/20104/19934/19988/27050/20102/225215/16785/15945/19896/68028/12273/66483/100043813/19094/100503670/19946/19899/20054/22121/100040298/57294 | 35 |
| mmu05145 | Toxoplasmosis                           | 21/807 | 101/5862 | 0.032295269 | 0.3477124   | 21939/18126/12265/15001/17087/16782/23928/22034/21947/14681/14960/15000/14998/15002/19094/14969/381091/14961/14999/15511/193740                                                                                                | 21 |
| mmu04950 | Maturity onset diabetes of the young    | 5/807  | 14/5862  | 0.033492375 | 0.348968935 | 30942/21410/18508/18088/378435                                                                                                                                                                                                 | 5  |
| mmu05321 | Inflammatory bowel disease              | 11/807 | 45/5862  | 0.03790601  | 0.37163003  | 15001/16186/14960/15000/14998/15002/209590/14969/381091/14961/14999                                                                                                                                                            | 11 |
| mmu00062 | Fatty acid elongation                   | 7/807  | 24/5862  | 0.037968393 | 0.37163003  | 74559/66775/83603/170439/217698/30963/26897                                                                                                                                                                                    | 7  |
| mmu04974 | Protein digestion and absorption        | 16/807 | 74/5862  | 0.041495691 | 0.385699929 | 12822/12842/12818/12821/12836/12839/12814/110891/12826/245026/12835/12829/12837/213945/232680/665033                                                                                                                           | 16 |



|          |                                         |        |          |             |             |                                                                                                                                                                                                                                                                                                     |    |
|----------|-----------------------------------------|--------|----------|-------------|-------------|-----------------------------------------------------------------------------------------------------------------------------------------------------------------------------------------------------------------------------------------------------------------------------------------------------|----|
| mmu04723 | Retrograde endocannabinoid signaling    | 25/807 | 128/5862 | 0.04179411  | 0.385699929 | 68198/14401/14394/432530/14406/14802/227197/12292/16519/66046/14397/140919/68197/11513/14681/14697/66066/14402/14073/22348/68342/12801/12288/19094/110886                                                                                                                                           | 25 |
| mmu04151 | PI3K-Akt signaling pathway              | 48/807 | 278/5862 | 0.052973579 | 0.475290721 | 12842/16400/12447/19116/16590/21687/12567/17295/12915/22629/22027/14180/11600/16419/12575/22339/56716/72930/18590/12839/16782/23928/13645/21923/20104/108079/18127/14254/12478/16186/12826/14697/66066/81877/16399/21825/245026/14924/12835/16002/13640/18205/231991/14184/16367/16542/12829/665033 | 48 |
| mmu04022 | cGMP-PKG signaling pathway              | 26/807 | 139/5862 | 0.060639797 | 0.529369036 | 17540/12915/432530/14463/12292/18127/19092/110891/320707/16532/11513/22068/11551/11554/17888/54611/11549/18386/11548/12288/231991/140781/242202/16367/14886/98932                                                                                                                                   | 26 |
| mmu05140 | Leishmaniasis                           | 13/807 | 61/5862  | 0.068524746 | 0.559571598 | 16415/18126/15001/22034/14960/15000/14998/15002/19094/14969/381091/14961/14999                                                                                                                                                                                                                      | 13 |
| mmu04726 | Serotonergic synapse                    | 16/807 | 79/5862  | 0.069389695 | 0.559571598 | 11684/14401/15566/12292/16519/230459/14681/14697/66066/22063/14402/15560/19224/15557/12288/16508                                                                                                                                                                                                    | 16 |
| mmu00591 | Linoleic acid metabolism                | 4/807  | 12/5862  | 0.071029212 | 0.559571598 | 26565/230459/665270/18784                                                                                                                                                                                                                                                                           | 4  |
| mmu00730 | Thiamine metabolism                     | 4/807  | 12/5862  | 0.071029212 | 0.559571598 | 11636/18041/11639/229949                                                                                                                                                                                                                                                                            | 4  |
| mmu04122 | Sulfur relay system                     | 3/807  | 8/5862   | 0.085363022 | 0.644757546 | 18041/233189/66965                                                                                                                                                                                                                                                                                  | 3  |
| mmu03030 | DNA replication                         | 8/807  | 34/5862  | 0.085834596 | 0.644757546 | 17216/68240/18972/17217/14156/69745/19891/381760                                                                                                                                                                                                                                                    | 8  |
| mmu03040 | Spliceosome                             | 23/807 | 128/5862 | 0.105477643 | 0.77430179  | 67465/20639/68988/67996/53817/69878/68092/225027/28000/73666/17149/56031/57905/50783/66055/76522/15382/68011/229279/20826/15511/66373/193740                                                                                                                                                        | 23 |
| mmu00590 | Arachidonic acid metabolism             | 7/807  | 30/5862  | 0.108312047 | 0.777439803 | 11684/26565/230459/665270/21391/18784/19224                                                                                                                                                                                                                                                         | 7  |
| mmu04724 | Glutamatergic synapse                   | 18/807 | 97/5862  | 0.111550357 | 0.783277508 | 20511/76257/432530/14823/26557/14802/16519/140919/11513/14681/110637/14697/66066/22063/210274/12288/14806/268934                                                                                                                                                                                    | 18 |
| mmu00220 | Arginine biosynthesis                   | 4/807  | 15/5862  | 0.140802587 | 0.947484078 | 18126/18127/18125/18416                                                                                                                                                                                                                                                                             | 4  |
| mmu00592 | alpha-Linolenic acid metabolism         | 4/807  | 15/5862  | 0.140802587 | 0.947484078 | 26565/56473/665270/18784                                                                                                                                                                                                                                                                            | 4  |
| mmu04970 | Salivary secretion                      | 12/807 | 63/5862  | 0.149380653 | 0.965045727 | 71395/432530/12494/19092/18125/320707/11513/11554/11549/12671/11548/74180                                                                                                                                                                                                                           | 12 |
| mmu00650 | Butanoate metabolism                    | 5/807  | 21/5862  | 0.152375641 | 0.965045727 | 15360/268860/14415/64059/208715                                                                                                                                                                                                                                                                     | 5  |
| mmu03430 | Mismatch repair                         | 5/807  | 21/5862  | 0.152375641 | 0.965045727 | 68240/18972/69745/19891/381760                                                                                                                                                                                                                                                                      | 5  |
| mmu05032 | Morphine addiction                      | 14/807 | 77/5862  | 0.166019166 | 0.99997156  | 14401/14394/432530/14406/16519/14397/11513/14681/14697/66066/14402/22348/54611/110886                                                                                                                                                                                                               | 14 |
| mmu05166 | Human T-cell leukemia virus 1 infection | 34/807 | 210/5862 | 0.17370912  | 0.99997156  | 16415/16818/12502/12447/19385/12567/17222/21374/12915/14991/21939/21423/432530/12575/12504/15001/16178/50883/16186/11513/23871/12500/14960/15000/14998/69957/15002/231991/110196/14969/381091/72049/14961/14999                                                                                     | 34 |
| mmu00900 | Terpenoid backbone biosynthesis         | 5/807  | 22/5862  | 0.176238909 | 0.99997156  | 19671/15360/319554/110196/208715                                                                                                                                                                                                                                                                    | 5  |
| mmu04911 | Insulin secretion                       | 12/807 | 66/5862  | 0.189663758 | 0.99997156  | 12915/432530/12292/11517/16532/11513/19339/116838/20927/12671/12288/231991                                                                                                                                                                                                                          | 12 |
| mmu04972 | Pancreatic secretion                    | 12/807 | 66/5862  | 0.189663758 | 0.99997156  | 432530/26565/80718/319229/12494/320707/11513/22063/18784/12671/12722/232680                                                                                                                                                                                                                         | 12 |

|          |                                                                        |        |          |             |            |                                                                                                                                                                                              |    |
|----------|------------------------------------------------------------------------|--------|----------|-------------|------------|----------------------------------------------------------------------------------------------------------------------------------------------------------------------------------------------|----|
| mmu05133 | Pertussis                                                              | 10/807 | 54/5862  | 0.20146769  | 0.99997156 | 16415/54131/18126/17087/15139/22034/66824/15900/106759/19094                                                                                                                                 | 10 |
| mmu04350 | TGF-beta signaling pathway                                             | 12/807 | 67/5862  | 0.204111864 | 0.99997156 | 268977/15903/13179/11477/12156/55994/18741/12163/17130/16324/21825/11481                                                                                                                     | 12 |
| mmu05169 | Epstein-Barr virus infection                                           | 31/807 | 195/5862 | 0.216992344 | 0.99997156 | 12502/12447/107986/54131/14128/12503/12567/14991/22123/21939/66413/67089/12575/18037/15001/12902/22034/12478/12500/15945/14960/15000/14998/15002/215446/19094/14969/17060/381091/14961/14999 | 31 |
| mmu05219 | Bladder cancer                                                         | 7/807  | 36/5862  | 0.218977972 | 0.99997156 | 12567/72962/12575/22339/13645/21825/14184                                                                                                                                                    | 7  |
| mmu05412 | Arrhythmogenic right ventricular cardiomyopathy                        | 12/807 | 68/5862  | 0.219026556 | 0.99997156 | 21414/16400/16419/12292/16905/110891/16399/67451/13511/12288/21415/54376                                                                                                                     | 12 |
| mmu04934 | Cushing syndrome                                                       | 20/807 | 121/5862 | 0.220291705 | 0.99997156 | 21414/12447/12567/14365/22413/12915/22411/23805/432530/22408/12575/12292/11513/13070/69544/16527/14371/12288/231991/21415                                                                    | 20 |
| mmu00250 | Alanine, aspartate and glutamate metabolism                            | 6/807  | 30/5862  | 0.223986771 | 0.99997156 | 14584/11564/27053/194237/268860/14415                                                                                                                                                        | 6  |
| mmu04550 | Signaling pathways regulating pluripotency of stem cells               | 17/807 | 102/5862 | 0.232881628 | 0.99997156 | 21414/15903/14365/22413/22411/23805/21423/16195/22408/11477/18508/55994/16324/14371/19094/14184/11481                                                                                        | 17 |
| mmu03008 | Ribosome biogenesis in eukaryotes                                      | 12/807 | 69/5862  | 0.234378132 | 0.99997156 | 52530/67619/14791/69237/21453/97112/245474/102462/110816/225348/14113/20826                                                                                                                  | 12 |
| mmu01212 | Fatty acid metabolism                                                  | 10/807 | 56/5862  | 0.235194973 | 0.99997156 | 74559/109729085/328845/56473/66775/83603/20249/170439/30963/14979                                                                                                                            | 10 |
| mmu03410 | Base excision repair                                                   | 6/807  | 31/5862  | 0.247935723 | 0.99997156 | 18972/14156/69745/11545/72774/71726                                                                                                                                                          | 6  |
| mmu00230 | Purine metabolism                                                      | 19/807 | 117/5862 | 0.252455954 | 0.99997156 | 27369/432530/50773/18103/66358/11564/224794/108147/11636/11639/67054/11513/229949/215446/54611/242202/23918/16434/328099                                                                     | 19 |
| mmu05414 | Dilated cardiomyopathy                                                 | 13/807 | 77/5862  | 0.255927581 | 0.99997156 | 16400/432530/16419/12292/16905/110891/11513/16399/11554/17888/12288/140781/54376                                                                                                             | 13 |
| mmu04020 | Calcium signaling pathway                                              | 28/807 | 179/5862 | 0.259585789 | 0.99997156 | 17295/432530/18436/18126/14180/22339/15566/18590/12292/13645/18127/12494/18125/14254/21336/110891/320707/11513/70086/11554/15560/11549/12671/11548/12288/14184/20698/16542                   | 28 |
| mmu00330 | Arginine and proline metabolism                                        | 6/807  | 32/5862  | 0.272567731 | 0.99997156 | 20810/18126/66194/69051/18127/18125                                                                                                                                                          | 6  |
| mmu04913 | Ovarian steroidogenesis                                                | 6/807  | 32/5862  | 0.272567731 | 0.99997156 | 432530/230459/11513/13070/217698/26897                                                                                                                                                       | 6  |
| mmu04623 | Cytosolic DNA-sensing pathway                                          | 8/807  | 45/5862  | 0.273685556 | 0.99997156 | 54131/245841/72512/26388/66824/26939/15945/20016                                                                                                                                             | 8  |
| mmu05410 | Hypertrophic cardiomyopathy                                            | 12/807 | 72/5862  | 0.282728671 | 0.99997156 | 16400/11421/16419/12292/16905/108079/110891/16399/17888/12288/140781/54376                                                                                                                   | 12 |
| mmu03440 | Homologous recombination                                               | 7/807  | 39/5862  | 0.285265069 | 0.99997156 | 68240/18972/69745/71711/19891/381760/268465                                                                                                                                                  | 7  |
| mmu04510 | Focal adhesion                                                         | 28/807 | 182/5862 | 0.29052872  | 0.99997156 | 12842/16400/17295/216148/170736/16419/22339/18590/12839/16782/23928/13645/21923/14254/22793/18481/12826/12927/81877/16399/241656/21825/245026/12835/16542/12829/98932/665033                 | 28 |
| mmu00532 | Glycosaminoglycan b-synthesis - chondroitin sulfate / dermatan sulfate | 4/807  | 20/5862  | 0.292893397 | 0.99997156 | 218271/234356/53374/78923                                                                                                                                                                    | 4  |
| mmu05164 | Influenza A                                                            | 20/807 | 129/5862 | 0.317947955 | 0.99997156 | 50528/54131/12567/12265/15001/66679/66824/270151/15945/14960/18854/15000/14998/15002/106759/110196/14969/381091/14961/14999                                                                  | 20 |

|          |                                                           |        |          |             |            |                                                                                                                                                        |    |
|----------|-----------------------------------------------------------|--------|----------|-------------|------------|--------------------------------------------------------------------------------------------------------------------------------------------------------|----|
| mmu04924 | Renin secretion                                           | 9/807  | 54/5862  | 0.322298397 | 0.99997156 | 11421/12292/19092/11517/11554/16518/54611/12288/12722                                                                                                  | 9  |
| mmu00290 | Valine, leucine and isoleucine biosynthesis               | 1/807  | 3/5862   | 0.358804384 | 0.99997156 | 12035                                                                                                                                                  | 1  |
| mmu04927 | Cortisol synthesis and secretion                          | 8/807  | 49/5862  | 0.360001843 | 0.99997156 | 12915/432530/12292/11513/13070/16527/12288/231991                                                                                                      | 8  |
| mmu04390 | Hippo signaling pathway                                   | 20/807 | 133/5862 | 0.370883682 | 0.99997156 | 16415/21414/14365/22413/22411/11799/22629/23805/72293/22408/72930/12156/97064/93960/12163/241324/101543/14371/21676/21415                              | 20 |
| mmu05226 | Gastric cancer                                            | 18/807 | 119/5862 | 0.371232091 | 0.99997156 | 21414/12447/107986/20423/14365/17295/22413/20183/22411/23805/216148/14180/22408/12575/13645/12557/14371/21415                                          | 18 |
| mmu04611 | Platelet activation                                       | 17/807 | 112/5862 | 0.371255061 | 0.99997156 | 12842/432530/18436/20619/18441/18127/19092/21391/11513/16399/70839/19224/14729/14723/14724/19094/243816                                                | 17 |
| mmu00513 | Various types of N-glycan biosynthesis                    | 6/807  | 36/5862  | 0.375293452 | 0.99997156 | 103963/68292/208624/140481/330406/207958                                                                                                               | 6  |
| mmu04926 | Relaxin signaling pathway                                 | 16/807 | 107/5862 | 0.401580354 | 0.99997156 | 12842/12915/216148/432530/18126/22339/18127/18125/12826/11513/14681/14697/66066/231991/19094/12829                                                     | 16 |
| mmu04725 | Cholinergic synapse                                       | 14/807 | 93/5862  | 0.403118936 | 0.99997156 | 16536/432530/12292/16519/11513/14681/14697/66066/16518/16515/16520/12671/12288/231991                                                                  | 14 |
| mmu00061 | Fatty acid biosynthesis                                   | 3/807  | 17/5862  | 0.421176307 | 0.99997156 | 109729085/328845/14979                                                                                                                                 | 3  |
| mmu00534 | Glycosaminoglycan b-synthesis - heparan sulfate / heparin | 4/807  | 24/5862  | 0.425409636 | 0.99997156 | 218271/83398/195646/50786                                                                                                                              | 4  |
| mmu00510 | N-Glycan biosynthesis                                     | 7/807  | 45/5862  | 0.427136913 | 0.99997156 | 20440/103963/68292/208624/140481/68563/207958                                                                                                          | 7  |
| mmu05205 | Proteoglycans in cancer                                   | 25/807 | 173/5862 | 0.429369879 | 0.99997156 | 12842/20423/83383/13345/14365/17295/22413/22411/20971/13179/66911/16419/22408/12575/22339/20104/13043/109676/15442/21825/16002/14371/19094/66922/16542 | 25 |
| mmu04660 | T cell receptor signaling pathway                         | 14/807 | 95/5862  | 0.435965364 | 0.99997156 | 16818/12502/12503/12567/12504/18037/12487/21947/18481/12500/241656/12526/19094/12525                                                                   | 14 |
| mmu04064 | NF-kappa B signaling pathway                              | 13/807 | 88/5862  | 0.437920068 | 0.99997156 | 16818/13608/21939/17087/21934/11545/22034/21947/105844/106759/13607/17060/72049                                                                        | 13 |
| mmu05222 | Small cell lung cancer                                    | 13/807 | 88/5862  | 0.437920068 | 0.99997156 | 16400/12447/107986/12567/20183/18126/12575/16782/23928/22034/12826/16399/12829                                                                         | 13 |
| mmu04916 | Melanogenesis                                             | 11/807 | 74/5862  | 0.441995767 | 0.99997156 | 21414/16590/14365/22413/22411/432530/22408/11513/14681/14371/21415                                                                                     | 11 |
| mmu04392 | Hippo signal-ng pathway - multiple species                | 4/807  | 25/5862  | 0.457892972 | 0.99997156 | 97064/101543/329628/21676                                                                                                                              | 4  |
| mmu00603 | Glycosphingolipid b-synthesis - globo and isoglobo series | 2/807  | 11/5862  | 0.459721216 | 0.99997156 | 26879/14348                                                                                                                                            | 2  |
| mmu00601 | Glycosphingolipid b-synthesis - lacto and neolacto series | 3/807  | 19/5862  | 0.497098554 | 0.99997156 | 108105/26879/14348                                                                                                                                     | 3  |
| mmu05146 | Amoebiasis                                                | 11/807 | 77/5862  | 0.497485849 | 0.99997156 | 16415/12842/432530/18126/16178/16782/23928/12479/12826/226421/2829                                                                                     | 11 |
| mmu04015 | Rap1 signaling pathway                                    | 25/807 | 179/5862 | 0.502477736 | 0.99997156 | 16415/16590/21687/17295/432530/14026/14180/11600/22339/18590/18441/13645/14254/11513/14681/12927/16399/21825/12801/14924/14293/13640/19094/14184/16542 | 25 |

|          |                                                        |        |          |             |            |                                                                                                                                                          |    |
|----------|--------------------------------------------------------|--------|----------|-------------|------------|----------------------------------------------------------------------------------------------------------------------------------------------------------|----|
| mmu05235 | PD-L1 expression and PD-1 checkpoint pathway in cancer | 12/807 | 85/5862  | 0.510497672 | 0.99997156 | 16818/12502/12503/12504/18037/12487/22034/13645/12500/106759/19094/11682                                                                                 | 12 |
| mmu03460 | Fanconi anemia pathway                                 | 7/807  | 49/5862  | 0.520701401 | 0.99997156 | 68240/50505/71711/230484/19891/268465/52864                                                                                                              | 7  |
| mmu04622 | RIG-I-like receptor signaling pathway                  | 7/807  | 49/5862  | 0.520701401 | 0.99997156 | 54131/72512/22034/270151/225913/15945/19094                                                                                                              | 7  |
| mmu03420 | Nucleotide excision repair                             | 6/807  | 42/5862  | 0.528774813 | 0.99997156 | 107986/68240/18972/50505/69745/19891                                                                                                                     | 6  |
| mmu04261 | Adrenergic signaling in cardiomyocytes                 | 17/807 | 123/5862 | 0.533420171 | 0.99997156 | 12915/432530/72930/12292/110891/320707/11513/20271/11554/17888/11549/11548/12288/231991/140781/19094/54376                                               | 17 |
| mmu04750 | Inflammatory mediator regulation of TRP channels       | 11/807 | 79/5862  | 0.533725325 | 0.99997156 | 11684/193034/63873/432530/14063/230459/11513/171382/15560/246788/19094                                                                                   | 11 |
| mmu04145 | Phagosome                                              | 19/807 | 138/5862 | 0.53815195  | 0.99997156 | 16415/14991/545486/16419/15001/17533/18125/170786/14960/15000/14998/21825/15002/226421/14969/381091/22144/14961/14999                                    | 19 |
| mmu00830 | Retinol metabolism                                     | 5/807  | 35/5862  | 0.538528135 | 0.99997156 | 19378/56847/13082/11761/20148                                                                                                                            | 5  |
| mmu00280 | Valine, leucine and isoleucine degradation             | 7/807  | 50/5862  | 0.543261534 | 0.99997156 | 15108/15360/12035/268860/11761/64059/208715                                                                                                              | 7  |
| mmu04370 | VEGF signaling pathway                                 | 7/807  | 50/5862  | 0.543261534 | 0.99997156 | 216148/22339/27371/18127/19094/20698/16542                                                                                                               | 7  |
| mmu04977 | Vitamin digestion and absorption                       | 2/807  | 13/5862  | 0.551822686 | 0.99997156 | 65969/665270                                                                                                                                             | 2  |
| mmu05224 | Breast cancer                                          | 16/807 | 117/5862 | 0.553053602 | 0.99997156 | 21414/107986/16590/12567/14365/22413/22411/23805/216148/14180/22408/12575/13645/18667/14371/21415                                                        | 16 |
| mmu05216 | Thyroid cancer                                         | 5/807  | 36/5862  | 0.564856309 | 0.99997156 | 21414/107986/20183/12575/21415                                                                                                                           | 5  |
| mmu03320 | PPAR signaling pathway                                 | 7/807  | 51/5862  | 0.565369278 | 0.99997156 | 20183/328845/56473/26458/15360/20249/208715                                                                                                              | 7  |
| mmu04613 | Neutrophil extracellular trap formation                | 21/807 | 155/5862 | 0.568149949 | 0.99997156 | 16415/15139/16399/14293/12273/14723/14289/19094/326619/319155/319184/170787/15267/319164/319157/665622/100041230/665596/14294/319187/319189              | 21 |
| mmu04014 | Ras signaling pathway                                  | 25/807 | 185/5862 | 0.573835412 | 0.99997156 | 16590/21687/17295/216148/14180/11600/26565/22339/15566/18590/13645/14254/18481/23871/14697/66066/241656/18784/16002/13640/18205/320484/14184/66922/16542 | 25 |
| mmu00970 | Aminoacyl-tRNA biosynthesis                            | 6/807  | 44/5862  | 0.576646088 | 0.99997156 | 15115/22321/104458/110960/67417/85305                                                                                                                    | 6  |
| mmu04923 | Regulation of lipolysis in adipocytes                  | 6/807  | 44/5862  | 0.576646088 | 0.99997156 | 432530/19092/11513/11554/19224/16367                                                                                                                     | 6  |
| mmu00564 | Glycerophospholipid metabolism                         | 11/807 | 82/5862  | 0.586304605 | 0.99997156 | 66358/210992/26565/14555/13139/665270/74596/236899/18784/331374/381925                                                                                   | 11 |
| mmu04713 | Circadian entrainment                                  | 11/807 | 82/5862  | 0.586304605 | 0.99997156 | 432530/14802/16519/19092/18125/11517/11513/14681/14697/66066/12288                                                                                       | 11 |
| mmu05418 | Fluid shear stress and atherosclerosis                 | 15/807 | 112/5862 | 0.588452582 | 0.99997156 | 15368/63873/20971/22027/22339/18590/16178/11477/108079/18127/14872/16399/19094/11481/16542                                                               | 15 |
| mmu00440 | Phosphonate and phosphinate metabolism                 | 1/807  | 6/5862   | 0.588969032 | 0.99997156 | 236899                                                                                                                                                   | 1  |
| mmu04062 | Chemokine signaling pathway                            | 19/807 | 142/5862 | 0.591562985 | 0.99997156 | 20308/216148/432530/20290/57266/12765/57349/56744/11513/12927/14697/66066/15945/12775/12458/12777/12145/12772/23832                                      | 19 |
| mmu01210 | 2-Oxocarboxylic acid metabolism                        | 2/807  | 14/5862  | 0.593532368 | 0.99997156 | 170718/12035                                                                                                                                             | 2  |

|          |                                                           |        |          |             |            |                                                                                                                                                                                                                                          |    |
|----------|-----------------------------------------------------------|--------|----------|-------------|------------|------------------------------------------------------------------------------------------------------------------------------------------------------------------------------------------------------------------------------------------|----|
| mmu04915 | Estrogen signaling pathway                                | 13/807 | 98/5862  | 0.602812335 | 0.99997156 | 12915/22027/216148/432530/16519/18127/11513/14681/18667/231991/16665/15511/193740                                                                                                                                                        | 13 |
| mmu04310 | Wnt signaling pathway                                     | 17/807 | 128/5862 | 0.603634723 | 0.99997156 | 21414/14365/22413/22411/23805/72293/22408/20671/192199/56505/20377/93960/228770/106042/319478/14371/21415                                                                                                                                | 17 |
| mmu04260 | Cardiac muscle contraction                                | 9/807  | 69/5862  | 0.62296222  | 0.99997156 | 66445/12292/110891/66694/17888/12288/333182/140781/54376                                                                                                                                                                                 | 9  |
| mmu04925 | Aldosterone synthesis and secretion                       | 10/807 | 77/5862  | 0.629721523 | 0.99997156 | 12915/432530/12292/320707/11513/13070/223604/16527/12288/231991                                                                                                                                                                          | 10 |
| mmu05142 | Chagas disease                                            | 11/807 | 85/5862  | 0.636109803 | 0.99997156 | 12502/12503/432530/11421/18126/72930/22034/14681/12500/106759/19094                                                                                                                                                                      | 11 |
| mmu03022 | Basal transcription factors                               | 5/807  | 39/5862  | 0.638892554 | 0.99997156 | 21374/21343/24074/108143/14886                                                                                                                                                                                                           | 5  |
| mmu04978 | Mineral absorption                                        | 5/807  | 39/5862  | 0.638892554 | 0.99997156 | 15368/11979/110891/320707/72027                                                                                                                                                                                                          | 5  |
| mmu00750 | Vitamin B6 metabolism                                     | 1/807  | 7/5862   | 0.645612132 | 0.99997156 | 11761                                                                                                                                                                                                                                    | 1  |
| mmu00983 | Drug-metabolism - other enzymes                           | 7/807  | 55/5862  | 0.648381151 | 0.99997156 | 22271/18103/22017/72962/14872/23918/16434                                                                                                                                                                                                | 7  |
| mmu05223 | Non-small cell lung cancer                                | 9/807  | 71/5862  | 0.658077349 | 0.99997156 | 107986/12567/17295/20183/12575/16574/13645/11682/16572                                                                                                                                                                                   | 9  |
| mmu05165 | Human papillomavirus infection                            | 38/807 | 290/5862 | 0.658261369 | 0.99997156 | 21414/12842/16400/12447/54131/12567/14365/22413/21374/22411/14991/17305/23805/16419/22408/12575/22339/72930/12839/16782/23928/13645/21923/74164/12826/81877/16399/21825/245026/14924/106759/12835/14371/231991/21415/433586/12829/665033 | 38 |
| mmu05152 | Tuberculosis                                              | 18/807 | 140/5862 | 0.661512142 | 0.99997156 | 16415/18126/12265/15001/16149/17533/22034/170786/14960/15000/14998/15002/19094/14969/20698/381091/14961/14999                                                                                                                            | 18 |
| mmu01230 | Biosynthesis of amino acids                               | 7/807  | 56/5862  | 0.667607331 | 0.99997156 | 66194/69051/170718/27053/12035/18416/328099                                                                                                                                                                                              | 7  |
| mmu05215 | Prostate cancer                                           | 11/807 | 88/5862  | 0.682588756 | 0.99997156 | 50528/21414/12447/22027/12575/18590/16178/13645/13876/231991/21415                                                                                                                                                                       | 11 |
| mmu00760 | Nicotinate and nicotinamide metabolism                    | 4/807  | 33/5862  | 0.684655912 | 0.99997156 | 50773/12494/11872/11761                                                                                                                                                                                                                  | 4  |
| mmu05225 | Hepatocellular carcinoma                                  | 18/807 | 142/5862 | 0.685589719 | 0.99997156 | 21414/20587/107986/15368/12567/14365/17295/22413/22411/23805/216148/22408/83797/12575/14872/16002/14371/21415                                                                                                                            | 18 |
| mmu01523 | Antifolate resistance                                     | 3/807  | 25/5862  | 0.689011687 | 0.99997156 | 11684/108147/26357                                                                                                                                                                                                                       | 3  |
| mmu00740 | Riboflavin metabolism                                     | 1/807  | 8/5862   | 0.694457736 | 0.99997156 | 11433                                                                                                                                                                                                                                    | 1  |
| mmu00670 | One carbon pool by folate                                 | 2/807  | 17/5862  | 0.700972415 | 0.99997156 | 108147/665563                                                                                                                                                                                                                            | 2  |
| mmu05202 | Transcriptional misregulation in cancer                   | 19/807 | 152/5862 | 0.712193108 | 0.99997156 | 50528/107986/18505/17295/18507/20183/21939/18612/21423/12575/18590/16178/18509/14254/20474/18854/13876/20471/15364                                                                                                                       | 19 |
| mmu04270 | Vascular smooth muscle contraction                        | 12/807 | 98/5862  | 0.714076373 | 0.99997156 | 17540/432530/26565/12292/109624/16532/11513/18784/11549/11548/12288/98932                                                                                                                                                                | 12 |
| mmu05218 | Melanoma                                                  | 7/807  | 59/5862  | 0.721269128 | 0.99997156 | 107986/12567/17295/14180/12575/18590/13645                                                                                                                                                                                               | 7  |
| mmu04540 | Gap junction                                              | 9/807  | 75/5862  | 0.722320837 | 0.99997156 | 545486/432530/18590/13645/19092/11513/11554/15560/22144                                                                                                                                                                                  | 9  |
| mmu04961 | Endocrine and other factor-regulated calcium reabsorption | 5/807  | 43/5862  | 0.724545268 | 0.99997156 | 110891/320707/19228/103967/16591                                                                                                                                                                                                         | 5  |
| mmu05034 | Alcoholism                                                | 18/807 | 146/5862 | 0.730741578 | 0.99997156 | 12915/216148/14681/14697/66066/231991/326619/319155/319184/170787/15267/319164/319157/665622/100041230/665596/319187/319189                                                                                                              | 18 |

|          |                                                     |        |          |             |            |                                                                                                       |    |
|----------|-----------------------------------------------------|--------|----------|-------------|------------|-------------------------------------------------------------------------------------------------------|----|
| mmu00130 | Ubiquinone and other terpenoid-quinone biosynthesis | 1/807  | 9/5862   | 0.736578099 | 0.99997156 | 52064                                                                                                 | 1  |
| mmu00430 | Taurine and hypotaurine metabolism                  | 1/807  | 9/5862   | 0.736578099 | 0.99997156 | 14415                                                                                                 | 1  |
| mmu00480 | Glutathione metabolism                              | 5/807  | 44/5862  | 0.743506701 | 0.99997156 | 110175/20810/11758/14872/66116                                                                        | 5  |
| mmu05144 | Malaria                                             | 5/807  | 44/5862  | 0.743506701 | 0.99997156 | 16415/17295/21939/21947/21825                                                                         | 5  |
| mmu00565 | Ether lipid metabolism                              | 4/807  | 36/5862  | 0.750169936 | 0.99997156 | 210992/26565/665270/18784                                                                             | 4  |
| mmu04929 | GnRH secretion                                      | 6/807  | 53/5862  | 0.756554577 | 0.99997156 | 15166/15165/12292/16519/22063/12288                                                                   | 6  |
| mmu00770 | Pantothenate and CoA biosynthesis                   | 2/807  | 19/5862  | 0.7586632   | 0.99997156 | 71743/12035                                                                                           | 2  |
| mmu04710 | Circadian rhythm                                    | 3/807  | 28/5862  | 0.761894974 | 0.99997156 | 18143/108079/225998                                                                                   | 3  |
| mmu04662 | B cell receptor signaling pathway                   | 9/807  | 78/5862  | 0.764941463 | 0.99997156 | 12518/18037/68713/12902/12517/12483/12478/15985/17060                                                 | 9  |
| mmu04630 | JAK-STAT signaling pathway                          | 13/807 | 110/5862 | 0.765268431 | 0.99997156 | 19116/50931/17480/16195/12575/14199/18590/13645/12804/16186/209590/239114/11761                       | 13 |
| mmu04115 | p53 signaling pathway                               | 7/807  | 62/5862  | 0.768721348 | 0.99997156 | 12447/107986/12567/12575/230784/50883/21825                                                           | 7  |
| mmu04979 | Cholesterol metabolism                              | 4/807  | 37/5862  | 0.769536212 | 0.99997156 | 11818/27413/16891/20661                                                                               | 4  |
| mmu04066 | HIF-1 signaling pathway                             | 11/807 | 95/5862  | 0.776305516 | 0.99997156 | 15368/21687/18126/68263/11600/12575/22339/13645/20104/18127/14254                                     | 11 |
| mmu04110 | Cell cycle                                          | 13/807 | 112/5862 | 0.78728774  | 0.99997156 | 12544/12447/17216/12567/17222/22629/140557/17217/12575/50883/12577/22137/69957                        | 13 |
| mmu04728 | Dopaminergic synapse                                | 13/807 | 112/5862 | 0.78728774  | 0.99997156 | 12915/72930/14802/16574/16519/14681/14697/66066/12288/231991/19094/20265/16572                        | 13 |
| mmu04213 | Longevity regulat-ng pathway - multiple species     | 6/807  | 55/5862  | 0.787764955 | 0.99997156 | 432530/108079/11513/16367/15511/193740                                                                | 6  |
| mmu04921 | Oxytocin signaling pathway                          | 15/807 | 128/5862 | 0.78794842  | 0.99997156 | 432530/12575/12292/16519/108079/18127/12494/11513/14681/16518/16515/16520/12288/54376/98932           | 15 |
| mmu00561 | Glycerolipid metabolism                             | 5/807  | 47/5862  | 0.794571067 | 0.99997156 | 13139/225913/16891/331374/381925                                                                      | 5  |
| mmu04072 | Phospholipase D signaling pathway                   | 15/807 | 129/5862 | 0.797754226 | 0.99997156 | 16590/216148/432530/14823/14126/13139/18590/12765/13645/11513/103967/66922/20698/331374/268934        | 15 |
| mmu05206 | MicroRNAs in cancer                                 | 17/807 | 145/5862 | 0.798714287 | 0.99997156 | 12447/15368/14365/17295/23805/22061/12575/22339/18590/21923/14086/81877/21825/13640/14184/16367/15364 | 17 |
| mmu03020 | RNA polymerase                                      | 3/807  | 30/5862  | 0.802328272 | 0.99997156 | 245841/26939/20016                                                                                    | 3  |
| mmu04130 | SNARE interactions in vesicular transport           | 3/807  | 30/5862  | 0.802328272 | 0.99997156 | 53330/20619/74732                                                                                     | 3  |
| mmu00920 | Sulfur metabolism                                   | 1/807  | 11/5862  | 0.804215884 | 0.99997156 | 211389                                                                                                | 1  |
| mmu00514 | Other types of O-glycan biosynthesis                | 4/807  | 39/5862  | 0.804713243 | 0.99997156 | 17305/108760/20440/233733                                                                             | 4  |
| mmu02010 | ABC transporters                                    | 5/807  | 48/5862  | 0.809709958 | 0.99997156 | 27413/26357/20927/74591/320631                                                                        | 5  |
| mmu04371 | Apelin signaling pathway                            | 13/807 | 115/5862 | 0.817511282 | 0.99997156 | 21780/432530/18126/20104/108079/18127/18125/110891/11513/14697/66066/66922/20698                      | 13 |

|          |                                                        |        |          |             |            |                                                                                                                                                         |    |
|----------|--------------------------------------------------------|--------|----------|-------------|------------|---------------------------------------------------------------------------------------------------------------------------------------------------------|----|
| mmu05203 | Viral carcinogenesis                                   | 23/807 | 195/5862 | 0.819948111 | 0.99997156 | 12447/20259/54131/19385/12567/21374/12915/14991/22629/16195/12575/66973/231991/326619/319155/319184/170787/319157/665622/100041230/665596/319187/319189 | 23 |
| mmu04930 | Type II diabetes mellitus                              | 4/807  | 40/5862  | 0.820596996 | 0.99997156 | 20927/378435/12288/16367                                                                                                                                | 4  |
| mmu00040 | Pentose and glucuronate interconversions               | 2/807  | 22/5862  | 0.827053717 | 0.99997156 | 20322/16591                                                                                                                                             | 2  |
| mmu04657 | IL-17 signaling pathway                                | 6/807  | 58/5862  | 0.828728405 | 0.99997156 | 22027/22034/15945/239114/19094/74180                                                                                                                    | 6  |
| mmu05213 | Endometrial cancer                                     | 6/807  | 58/5862  | 0.828728405 | 0.99997156 | 21414/107986/23805/12575/13645/21415                                                                                                                    | 6  |
| mmu05207 | Chemical carcinogenesis - receptor activation          | 17/807 | 149/5862 | 0.832825883 | 0.99997156 | 12355/12915/20183/11799/22027/432530/14180/22408/22339/12292/13645/11513/18667/14872/11554/12288/231991                                                 | 17 |
| mmu01521 | EGFR tyrosine kinase inhibitor resistance              | 8/807  | 76/5862  | 0.839950166 | 0.99997156 | 17295/216148/22339/18590/13645/20104/14184/16542                                                                                                        | 8  |
| mmu04714 | Thermogenesis                                          | 24/807 | 206/5862 | 0.841621063 | 0.99997156 | 20587/68198/66043/432530/66445/83797/56716/227197/66046/68493/20104/108079/19092/68197/11513/12163/66694/70673/68342/12801/333182/231991/19094/67942    | 24 |
| mmu01240 | Biosynthesis of cofactors                              | 14/807 | 126/5862 | 0.843018612 | 0.99997156 | 71743/18103/11564/11636/18041/11639/665563/12035/67417/209176/29949/98256/52064/20148                                                                   | 14 |
| mmu04975 | Fat digestion and absorption                           | 2/807  | 23/5862  | 0.845649884 | 0.99997156 | 26565/18784                                                                                                                                             | 2  |
| mmu03015 | mRNA surveillance pathway                              | 9/807  | 85/5862  | 0.845792503 | 0.99997156 | 229512/53817/68092/72930/17149/108062/68219/17690/78428                                                                                                 | 9  |
| mmu03013 | Nucleocytoplasmic transport                            | 11/807 | 102/5862 | 0.848634765 | 0.99997156 | 110750/53817/68092/73666/66679/97112/17149/269113/234865/76582/78428                                                                                    | 11 |
| mmu00240 | Pyrimidine metabolism                                  | 5/807  | 51/5862  | 0.849831984 | 0.99997156 | 22271/50773/18103/72962/215446                                                                                                                          | 5  |
| mmu00380 | Tryptophan metabolism                                  | 3/807  | 33/5862  | 0.852052434 | 0.99997156 | 209176/98256/11761                                                                                                                                      | 3  |
| mmu04721 | Synaptic vesicle cycle                                 | 6/807  | 60/5862  | 0.852350547 | 0.99997156 | 20511/140919/19339/22348/103967/208898                                                                                                                  | 6  |
| mmu03450 | Non-homologous end-joining                             | 1/807  | 13/5862  | 0.854502498 | 0.99997156 | 14156                                                                                                                                                   | 1  |
| mmu04928 | Parathyroid hormone synthesis, secretion and action    | 9/807  | 86/5862  | 0.85531664  | 0.99997156 | 12915/20183/432530/12575/11513/19228/231991/16591/17938                                                                                                 | 9  |
| mmu04931 | Insulin resistance                                     | 10/807 | 95/5862  | 0.860455547 | 0.99997156 | 21428/14584/26458/108079/18127/244416/228966/231991/16367/105651                                                                                        | 10 |
| mmu04918 | Thyroid hormone synthesis                              | 5/807  | 52/5862  | 0.861543768 | 0.99997156 | 12915/22027/432530/11513/231991                                                                                                                         | 5  |
| mmu04530 | Tight junction                                         | 15/807 | 137/5862 | 0.864718494 | 0.99997156 | 72058/12567/14463/72930/74192/12479/54357/108079/13043/56332/231830/16456/14924/22144/98932                                                             | 15 |
| mmu05134 | Legionellosis                                          | 5/807  | 53/5862  | 0.872480142 | 0.99997156 | 16415/66824/67160/15511/193740                                                                                                                          | 5  |
| mmu03050 | Proteasome                                             | 4/807  | 44/5862  | 0.873795126 | 0.99997156 | 22123/66413/67089/26441                                                                                                                                 | 4  |
| mmu00500 | Starch and sucrose metabolism                          | 2/807  | 25/5862  | 0.877489217 | 0.99997156 | 70974/232714                                                                                                                                            | 2  |
| mmu00563 | Glycosylphosphatidylinositol (GPI)-anchor biosynthesis | 2/807  | 25/5862  | 0.877489217 | 0.99997156 | 66268/56703                                                                                                                                             | 2  |

|          |                                                |        |          |             |            |                                                                                                                                                                                                                                                               |    |
|----------|------------------------------------------------|--------|----------|-------------|------------|---------------------------------------------------------------------------------------------------------------------------------------------------------------------------------------------------------------------------------------------------------------|----|
| mmu03060 | Protein export                                 | 2/807  | 25/5862  | 0.877489217 | 0.99997156 | 66624/93757                                                                                                                                                                                                                                                   | 2  |
| mmu04935 | Growth hormone synthesis, secretion and action | 10/807 | 98/5862  | 0.884523877 | 0.99997156 | 12915/216148/432530/12292/11513/12927/12288/231991/19094/16367                                                                                                                                                                                                | 10 |
| mmu04211 | Longevity regulating pathway                   | 8/807  | 81/5862  | 0.886178018 | 0.99997156 | 12915/432530/108079/230784/11513/231991/16367/16591                                                                                                                                                                                                           | 8  |
| mmu00620 | Pyruvate metabolism                            | 3/807  | 36/5862  | 0.890503171 | 0.99997156 | 68263/107029/68738                                                                                                                                                                                                                                            | 3  |
| mmu00140 | Steroid hormone biosynthesis                   | 2/807  | 26/5862  | 0.891029548 | 0.99997156 | 13070/14979                                                                                                                                                                                                                                                   | 2  |
| mmu00512 | Mucin type O-glycan biosynthesis               | 2/807  | 26/5862  | 0.891029548 | 0.99997156 | 108760/233733                                                                                                                                                                                                                                                 | 2  |
| mmu00340 | Histidine metabolism                           | 1/807  | 15/5862  | 0.891884966 | 0.99997156 | 140483                                                                                                                                                                                                                                                        | 1  |
| mmu04614 | Renin-angiotensin system                       | 1/807  | 15/5862  | 0.891884966 | 0.99997156 | 11421                                                                                                                                                                                                                                                         | 1  |
| mmu00020 | Citrate cycle (TCA cycle)                      | 2/807  | 27/5862  | 0.903169072 | 0.99997156 | 68263/170718                                                                                                                                                                                                                                                  | 2  |
| mmu00410 | beta-Alanine metabolism                        | 2/807  | 27/5862  | 0.903169072 | 0.99997156 | 268860/14415                                                                                                                                                                                                                                                  | 2  |
| mmu05143 | African trypanosomiasis                        | 2/807  | 27/5862  | 0.903169072 | 0.99997156 | 14063/209176                                                                                                                                                                                                                                                  | 2  |
| mmu00100 | Steroid biosynthesis                           | 1/807  | 16/5862  | 0.906806948 | 0.99997156 | 16987                                                                                                                                                                                                                                                         | 1  |
| mmu04964 | Proximal tubule bicarbonate reclamation        | 1/807  | 16/5862  | 0.906806948 | 0.99997156 | 76257                                                                                                                                                                                                                                                         | 1  |
| mmu05162 | Measles                                        | 12/807 | 119/5862 | 0.909955499 | 0.99997156 | 12502/12447/54131/12567/27218/12487/22034/16186/170786/12500/1511/193740                                                                                                                                                                                      | 12 |
| mmu04810 | Regulation of actin cytoskeleton               | 20/807 | 186/5862 | 0.910235796 | 0.99997156 | 16415/16400/20259/23805/14180/16419/14163/18590/74192/50884/13645/18481/12927/16399/241656/12671/19241/14184/66922/98932                                                                                                                                      | 20 |
| mmu00051 | Fructose and mannose metabolism                | 2/807  | 28/5862  | 0.91403631  | 0.99997156 | 20322/225913                                                                                                                                                                                                                                                  | 2  |
| mmu00640 | Propanoate metabolism                          | 2/807  | 28/5862  | 0.91403631  | 0.99997156 | 68738/268860                                                                                                                                                                                                                                                  | 2  |
| mmu05211 | Renal cell carcinoma                           | 6/807  | 67/5862  | 0.914870064 | 0.99997156 | 17295/12575/22339/18481/23871/241656                                                                                                                                                                                                                          | 6  |
| mmu05214 | Glioma                                         | 6/807  | 67/5862  | 0.914870064 | 0.99997156 | 107986/12567/216148/12575/18590/13645                                                                                                                                                                                                                         | 6  |
| mmu00053 | Ascorbate and aldarate metabolism              | 1/807  | 17/5862  | 0.919671607 | 0.99997156 | 16591                                                                                                                                                                                                                                                         | 1  |
| mmu05168 | Herpes simplex virus 1 infection               | 39/807 | 342/5862 | 0.920143885 | 0.99997156 | 54131/217715/14991/67996/225027/15001/72512/16149/15139/22034/22696/231866/78921/22751/69020/14960/18854/15000/14998/15002/56220/330788/101197/233893/106759/22719/237775/233168/235047/14969/433804/232855/381091/232966/14961/665211/408065/14999/100233208 | 39 |
| mmu04620 | Toll-like receptor signaling pathway           | 7/807  | 77/5862  | 0.920717584 | 0.99997156 | 54131/21939/17087/22034/15945/106759/19094                                                                                                                                                                                                                    | 7  |
| mmu05020 | Prion disease                                  | 26/807 | 238/5862 | 0.922021006 | 0.99997156 | 68198/66043/12915/545486/22123/66413/67089/66445/227197/12292/16574/15139/66046/68197/26441/66694/68342/12288/333182/231991/19094/67942/22144/16572/15511/193740                                                                                              | 26 |
| mmu0421- | Apoptosis - multiple species                   | 2/807  | 29/5862  | 0.923750994 | 0.99997156 | 11799/18952                                                                                                                                                                                                                                                   | 2  |



|          |                                           |        |          |             |            |                                                                                                                                                              |    |
|----------|-------------------------------------------|--------|----------|-------------|------------|--------------------------------------------------------------------------------------------------------------------------------------------------------------|----|
| mmu04971 | Gastric acid secretion                    | 5/807  | 59/5862  | 0.923792143 | 0.99997156 | 432530/11513/16518/12671/16517                                                                                                                               | 5  |
| mmu04330 | Notch signaling pathway                   | 4/807  | 50/5862  | 0.927938285 | 0.99997156 | 17305/80904/68318/433586                                                                                                                                     | 4  |
| mmu04920 | Adipocytokine signaling pathway           | 5/807  | 60/5862  | 0.930286833 | 0.99997156 | 20183/18037/328845/108079/16367                                                                                                                              | 5  |
| mmu04976 | Bile secretion                            | 5/807  | 60/5862  | 0.930286833 | 0.99997156 | 432530/319229/27413/26357/11513                                                                                                                              | 5  |
| mmu00531 | Glycosaminoglycan degradation             | 1/807  | 18/5862  | 0.930762285 | 0.99997156 | 15442                                                                                                                                                        | 1  |
| mmu00790 | Folate biosynthesis                       | 1/807  | 18/5862  | 0.930762285 | 0.99997156 | 110391                                                                                                                                                       | 1  |
| mmu04670 | Leukocyte transendothelial migration      | 8/807  | 88/5862  | 0.931798784 | 0.99997156 | 16415/69524/74734/12927/21838/16456/19094/98932                                                                                                              | 8  |
| mmu04960 | Aldosterone-regulated sodium reabsorption | 2/807  | 30/5862  | 0.932424045 | 0.99997156 | 20276/16367                                                                                                                                                  | 2  |
| mmu04024 | cAMP signaling pathway                    | 16/807 | 158/5862 | 0.933217692 | 0.99997156 | 20682/15166/432530/14802/12292/11517/320707/11513/330953/11554/54611/15557/12288/231991/66922/98932                                                          | 16 |
| mmu05100 | Bacterial invasion of epithelial cells    | 6/807  | 70/5862  | 0.933671283 | 0.99997156 | 17295/216148/74192/13043/12927/103967                                                                                                                        | 6  |
| mmu05230 | Central carbon metabolism in cancer       | 5/807  | 61/5862  | 0.936283556 | 0.99997156 | 16590/17295/68263/14184/100126824                                                                                                                            | 5  |
| mmu04068 | FoxO signaling pathway                    | 11/807 | 116/5862 | 0.937832603 | 0.99997156 | 12575/26557/13645/108079/57436/13611/13609/329934/19094/16367/15469                                                                                          | 11 |
| mmu03018 | RNA degradation                           | 6/807  | 71/5862  | 0.939066987 | 0.99997156 | 57316/69639/50783/227715/76522/66373                                                                                                                         | 6  |
| mmu0413- | Autophagy - other                         | 2/807  | 31/5862  | 0.940157732 | 0.99997156 | 56716/57436                                                                                                                                                  | 2  |
| mmu00515 | Mannose type O-glycan biosynthesis        | 1/807  | 19/5862  | 0.940323345 | 0.99997156 | 14348                                                                                                                                                        | 1  |
| mmu04114 | Oocyte meiosis                            | 9/807  | 99/5862  | 0.941225992 | 0.99997156 | 12447/17222/22629/432530/140557/11513/18667/69957/19094                                                                                                      | 9  |
| mmu04210 | Apoptosis                                 | 12/807 | 126/5862 | 0.942746925 | 0.99997156 | 13804/11799/18952/13041/11545/69601/229445/16905/13368/13032/12123/22144                                                                                     | 12 |
| mmu04740 | Olfactory transduction                    | 6/807  | 72/5862  | 0.944068592 | 0.99997156 | 19092/110891/243634/258808/258189/259081                                                                                                                     | 6  |
| mmu04730 | Long-term depression                      | 4/807  | 53/5862  | 0.946239171 | 0.99997156 | 19092/18125/14681/14687                                                                                                                                      | 4  |
| mmu05210 | Colorectal cancer                         | 7/807  | 82/5862  | 0.946882571 | 0.99997156 | 21414/107986/11799/23805/12575/13645/21415                                                                                                                   | 7  |
| mmu05221 | Acute myeloid leukemia                    | 5/807  | 64/5862  | 0.951595458 | 0.99997156 | 21414/16590/18715/18854/21415                                                                                                                                | 5  |
| mmu00600 | Sphingolipid metabolism                   | 3/807  | 44/5862  | 0.953081189 | 0.99997156 | 70059/230379/20698                                                                                                                                           | 3  |
| mmu00860 | Porphyrin and chlorophyll metabolism      | 2/807  | 33/5862  | 0.953174556 | 0.99997156 | 15368/67417                                                                                                                                                  | 2  |
| mmu04650 | Natural killer cell mediated cytotoxicity | 8/807  | 93/5862  | 0.953754078 | 0.99997156 | 16415/16818/15896/20400/12503/12506/216148/16638                                                                                                             | 8  |
| mmu05132 | Salmonella infection                      | 24/807 | 232/5862 | 0.953883055 | 0.99997156 | 21414/110750/545486/22027/17087/240752/74192/16574/50884/22034/80743/74734/18705/27050/66824/18481/71999/80837/226421/19094/21415/22144/98932/16572          | 24 |
| mmu04010 | MAPK signaling pathway                    | 26/807 | 249/5862 | 0.954668703 | 0.99997156 | 19060/65964/16590/21687/17295/14180/11600/22339/18590/12292/22034/13537/13645/14254/26411/16002/13640/18205/12288/19094/14184/66922/16542/54376/15511/193740 | 26 |

|          |                                                      |        |          |             |            |                                                                                                                                                                                                                       |    |
|----------|------------------------------------------------------|--------|----------|-------------|------------|-----------------------------------------------------------------------------------------------------------------------------------------------------------------------------------------------------------------------|----|
| mmu04933 | AGE-RAGE signaling pathway in diabetic complications | 7/807  | 84/5862  | 0.95498373  | 0.99997156 | 12842/12567/22339/18127/12826/19094/12829                                                                                                                                                                             | 7  |
| mmu05031 | Amphetamine addiction                                | 4/807  | 55/5862  | 0.955963976 | 0.99997156 | 12915/14802/12288/231991                                                                                                                                                                                              | 4  |
| mmu04071 | Sphingolipid signaling pathway                       | 10/807 | 112/5862 | 0.956184603 | 0.99997156 | 70059/72930/14126/18127/230379/13611/13609/18386/19094/20698                                                                                                                                                          | 10 |
| mmu04520 | Adherens junction                                    | 5/807  | 66/5862  | 0.959859308 | 0.99997156 | 14158/21414/17295/99167/21415                                                                                                                                                                                         | 5  |
| mmu00030 | Pentose phosphate pathway                            | 1/807  | 22/5862  | 0.961795173 | 0.99997156 | 328099                                                                                                                                                                                                                | 1  |
| mmu01522 | Endocrine resistance                                 | 7/807  | 86/5862  | 0.961957882 | 0.99997156 | 12567/216148/432530/12575/27413/11513/19094                                                                                                                                                                           | 7  |
| mmu04340 | Hedgehog signaling pathway                           | 3/807  | 46/5862  | 0.962363576 | 0.99997156 | 20423/269878/68525                                                                                                                                                                                                    | 3  |
| mmu0413- | Mitophagy - animal                                   | 5/807  | 67/5862  | 0.963487473 | 0.99997156 | 78294/57436/233204/226421/66922                                                                                                                                                                                       | 5  |
| mmu04914 | Progesterone-mediated oocyte maturation              | 6/807  | 77/5862  | 0.963966563 | 0.99997156 | 17222/432530/11513/18667/69957/19094                                                                                                                                                                                  | 6  |
| mmu05415 | Diabetic cardiomyopathy                              | 18/807 | 186/5862 | 0.965190205 | 0.99997156 | 12842/68198/66043/14584/11421/68263/66445/227197/11545/66046/18127/68197/66694/68342/333182/19094/16367/67942                                                                                                         | 18 |
| mmu00350 | Tyrosine metabolism                                  | 1/807  | 23/5862  | 0.967074505 | 0.99997156 | 11761                                                                                                                                                                                                                 | 1  |
| mmu05135 | Yersinia infection                                   | 11/807 | 125/5862 | 0.967203347 | 0.99997156 | 16818/54131/12504/74192/22034/66824/12927/106759/12526/19094/12525                                                                                                                                                    | 11 |
| mmu00982 | Drug-metabolism - cytochrome P450                    | 2/807  | 36/5862  | 0.967750542 | 0.99997156 | 14872/11761                                                                                                                                                                                                           | 2  |
| mmu04216 | Ferroptosis                                          | 2/807  | 37/5862  | 0.97155476  | 0.99997156 | 15368/26570                                                                                                                                                                                                           | 2  |
| mmu00190 | Oxidative phosphorylation                            | 10/807 | 118/5862 | 0.972177702 | 0.99997156 | 68198/66043/66445/227197/66046/68197/66694/68342/333182/67942                                                                                                                                                         | 10 |
| mmu04146 | Peroxisome                                           | 5/807  | 70/5862  | 0.972638755 | 0.99997156 | 18126/26458/58869/26378/74043                                                                                                                                                                                         | 5  |
| mmu04917 | Prolactin signaling pathway                          | 4/807  | 60/5862  | 0.973615582 | 0.99997156 | 19116/216148/21934/19094                                                                                                                                                                                              | 4  |
| mmu05030 | Cocaine addiction                                    | 2/807  | 38/5862  | 0.974924313 | 0.99997156 | 12915/231991                                                                                                                                                                                                          | 2  |
| mmu05231 | Choline metabolism in cancer                         | 7/807  | 91/5862  | 0.975318135 | 0.99997156 | 20519/13139/18590/13645/100434/236899/331374                                                                                                                                                                          | 7  |
| mmu04722 | Neurotrophin signaling pathway                       | 9/807  | 111/5862 | 0.976943404 | 0.99997156 | 216148/170936/18037/22034/18205/19094/16367/65020/20661                                                                                                                                                               | 9  |
| mmu05014 | Amyotrophic lateral sclerosis                        | 34/807 | 329/5862 | 0.977191297 | 0.99997156 | 68198/66043/20511/641376/545486/22123/110084/18126/66413/67089/66445/225027/227197/16574/66679/66046/18125/68197/26441/269113/18391/17184/56087/66694/234865/68342/15382/333182/19094/237806/229279/67942/22144/16572 | 34 |
| mmu04932 | Non-alcoholic fatty liver disease                    | 12/807 | 140/5862 | 0.978766859 | 0.99997156 | 68198/21428/66445/227197/66046/108079/68197/66694/68342/333182/19094/16367                                                                                                                                            | 12 |
| mmu00052 | Galactose metabolism                                 | 1/807  | 26/5862  | 0.978928134 | 0.99997156 | 232714                                                                                                                                                                                                                | 1  |
| mmu00260 | Glycine, serine and threonine metabolism             | 1/807  | 26/5862  | 0.978928134 | 0.99997156 | 192166                                                                                                                                                                                                                | 1  |
| mmu04912 | GnRH signaling pathway                               | 5/807  | 73/5862  | 0.97962192  | 0.99997156 | 432530/12292/11513/12288/19094                                                                                                                                                                                        | 5  |

|          |                                                   |        |          |             |            |                                                                                                                                                                                                                                                                                       |    |
|----------|---------------------------------------------------|--------|----------|-------------|------------|---------------------------------------------------------------------------------------------------------------------------------------------------------------------------------------------------------------------------------------------------------------------------------------|----|
| mmu05212 | Pancreatic cancer                                 | 5/807  | 73/5862  | 0.97962192  | 0.99997156 | 107986/12567/12575/22339/13645                                                                                                                                                                                                                                                        | 5  |
| mmu05200 | Pathways in cancer                                | 46/807 | 431/5862 | 0.980351415 | 0.99997156 | 21414/16400/12447/107986/20423/15368/16590/12567/14365/17295/22413/20183/22411/11799/22027/23805/432530/18126/16195/14180/22408/12575/22339/18590/16782/23928/22034/12156/13645/18715/16186/1826/11513/23871/14697/66066/14872/16399/18854/16002/209590/14371/14184/11682/21415/12829 | 46 |
| mmu00270 | Cysteine and methionine metabolism                | 2/807  | 40/5862  | 0.980544242 | 0.99997156 | 20810/12035                                                                                                                                                                                                                                                                           | 2  |
| mmu05204 | Chemical car-inogenesis - DNA adducts             | 1/807  | 27/5862  | 0.981841944 | 0.99997156 | 14872                                                                                                                                                                                                                                                                                 | 1  |
| mmu05417 | Lipid and atherosclerosis                         | 15/807 | 170/5862 | 0.982528951 | 0.99997156 | 54131/20183/21939/22027/22359/17087/22034/230459/18127/66824/21947/106759/19094/15511/193740                                                                                                                                                                                          | 15 |
| mmu05010 | Alzheimer disease                                 | 34/807 | 336/5862 | 0.984139258 | 0.99997156 | 68198/66043/14365/22413/22411/545486/22123/23805/18126/66413/67089/66445/22408/15108/227197/12292/16574/66046/18125/68197/26441/11785/66694/68342/12671/14371/12288/333182/68318/16367/67942/72027/22144/16572                                                                        | 34 |
| mmu00630 | Glyoxylate and dicarboxylate metabolism           | 1/807  | 28/5862  | 0.984353264 | 0.99997156 | 68738                                                                                                                                                                                                                                                                                 | 1  |
| mmu05016 | Huntington disease                                | 27/807 | 277/5862 | 0.984437629 | 0.99997156 | 68198/66043/21780/20511/21374/545486/22123/110084/245841/66413/67089/66445/14802/227197/16574/66046/68197/26441/56087/66694/68342/333182/231991/237806/67942/22144/16572                                                                                                              | 27 |
| mmu01524 | Platinum drug resistance                          | 4/807  | 65/5862  | 0.984460016 | 0.99997156 | 11979/11799/12575/14872                                                                                                                                                                                                                                                               | 4  |
| mmu05160 | Hepatitis C                                       | 10/807 | 126/5862 | 0.985292237 | 0.99997156 | 54131/12567/22629/16341/12575/72930/22034/13645/15945/106759                                                                                                                                                                                                                          | 10 |
| mmu01200 | Carbon metabolism                                 | 7/807  | 97/5862  | 0.985613181 | 0.99997156 | 68263/13885/107029/170718/68738/225913/328099                                                                                                                                                                                                                                         | 7  |
| mmu04625 | C-type lectin receptor signaling pathway          | 6/807  | 87/5862  | 0.985791761 | 0.99997156 | 56760/66824/170786/239114/19094/66922                                                                                                                                                                                                                                                 | 6  |
| mmu05208 | Chemical car-inogenesis - reactive oxygen species | 17/807 | 191/5862 | 0.985812101 | 0.99997156 | 68198/66043/15368/17295/66445/22339/227197/66046/13645/68197/14872/66694/68342/231583/333182/19094/67942                                                                                                                                                                              | 17 |
| mmu00310 | Lysine degradation                                | 3/807  | 56/5862  | 0.9879968   | 0.99997156 | 18822/70673/239122                                                                                                                                                                                                                                                                    | 3  |
| mmu05012 | Parkinson disease                                 | 22/807 | 238/5862 | 0.988056468 | 0.99997156 | 68198/66043/545486/22123/78294/66413/67089/66445/67847/227197/16574/66046/68197/26441/66694/68342/333182/67942/72027/22144/18951/16572                                                                                                                                                | 22 |
| mmu04218 | Cellular senescence                               | 12/807 | 148/5862 | 0.988498626 | 0.99997156 | 12447/12567/63873/14991/12192/14463/19355/12575/50883/23871/19094/66922                                                                                                                                                                                                               | 12 |
| mmu04070 | Phosphatidylinositol signaling system             | 6/807  | 90/5862  | 0.989379278 | 0.99997156 | 84095/13139/240752/74596/18705/331374                                                                                                                                                                                                                                                 | 6  |
| mmu04668 | TNF signaling pathway                             | 6/807  | 90/5862  | 0.989379278 | 0.99997156 | 12915/69601/15945/67384/231991/19094                                                                                                                                                                                                                                                  | 6  |
| mmu04012 | ErbB signaling pathway                            | 5/807  | 80/5862  | 0.989973519 | 0.99997156 | 216148/12575/13645/18481/241656                                                                                                                                                                                                                                                       | 5  |
| mmu04142 | Lysosome                                          | 9/807  | 121/5862 | 0.990086411 | 0.99997156 | 11433/11781/56722/13041/229445/56629/13032/74105/20661                                                                                                                                                                                                                                | 9  |
| mmu00520 | Amino sugar and nucleotide sugar metabolism       | 2/807  | 46/5862  | 0.991014753 | 0.99997156 | 14584/54342                                                                                                                                                                                                                                                                           | 2  |
| mmu00010 | Glycolysis / Gluconeogenesis                      | 2/807  | 47/5862  | 0.992111888 | 0.99997156 | 68263/68738                                                                                                                                                                                                                                                                           | 2  |

|          |                                                   |        |          |             |            |                                                                                                                                                                                                                                                             |    |
|----------|---------------------------------------------------|--------|----------|-------------|------------|-------------------------------------------------------------------------------------------------------------------------------------------------------------------------------------------------------------------------------------------------------------|----|
| mmu04150 | mTOR signaling pathway                            | 10/807 | 135/5862 | 0.993098722 | 0.99997156 | 14365/22413/22411/22408/56716/20104/108079/230784/14371/16367                                                                                                                                                                                               | 10 |
| mmu00980 | Metabolism of xenobiotics by cytochrome P450      | 1/807  | 34/5862  | 0.993598244 | 0.99997156 | 14872                                                                                                                                                                                                                                                       | 1  |
| mmu04973 | Carbohydrate digestion and absorption             | 1/807  | 34/5862  | 0.993598244 | 0.99997156 | 232714                                                                                                                                                                                                                                                      | 1  |
| mmu05161 | Hepatitis B                                       | 10/807 | 136/5862 | 0.993670399 | 0.99997156 | 12447/107986/54131/12915/11799/12575/22034/106759/231991/19094                                                                                                                                                                                              | 10 |
| mmu05220 | Chronic myeloid leukemia                          | 4/807  | 74/5862  | 0.994222763 | 0.99997156 | 107986/12567/216148/12575                                                                                                                                                                                                                                   | 4  |
| mmu05022 | Pathways of neurodegeneration - multiple diseases | 41/807 | 415/5862 | 0.994592881 | 0.99997156 | 68198/66043/641376/14365/22413/22411/545486/22123/110084/23805/78294/18126/66413/67089/66445/22408/67847/15108/14802/227197/12292/16574/66046/22065/18125/68197/26441/18391/56087/66694/68342/12671/14371/12288/333182/19094/237806/67942/22144/18951/16572 | 41 |
| mmu00071 | Fatty acid degradation                            | 1/807  | 36/5862  | 0.995248524 | 0.99997156 | 328845                                                                                                                                                                                                                                                      | 1  |
| mmu04919 | Thyroid hormone signaling pathway                 | 7/807  | 109/5862 | 0.995393234 | 0.99997156 | 20183/14463/67381/53901/17888/140781/329650                                                                                                                                                                                                                 | 7  |
| mmu05163 | Human cytomegalovirus infection                   | 16/807 | 198/5862 | 0.995618638 | 0.99997156 | 54131/12567/12915/14991/432530/12575/22339/72512/12765/11513/14681/12927/14697/66066/231991/19094                                                                                                                                                           | 16 |
| mmu05167 | Kaposi sarcoma-associated herpesvirus infection   | 13/807 | 170/5862 | 0.995778924 | 0.99997156 | 21414/54131/12567/14991/78294/16195/12575/22339/14697/66066/106759/19094/21415                                                                                                                                                                              | 13 |
| mmu04962 | Vasopressin-regulated water reabsorption          | 1/807  | 37/5862  | 0.995906684 | 0.99997156 | 231991                                                                                                                                                                                                                                                      | 1  |
| mmu04141 | Protein processing in endoplasmic reticulum       | 11/807 | 155/5862 | 0.997140724 | 0.99997156 | 12915/216080/22027/103963/68292/105245/66435/66245/228684/15511/193740                                                                                                                                                                                      | 11 |
| mmu00562 | Inositol phosphate metabolism                     | 3/807  | 69/5862  | 0.99748835  | 0.99997156 | 84095/240752/18705                                                                                                                                                                                                                                          | 3  |
| mmu04664 | Fc epsilon RI signaling pathway                   | 2/807  | 56/5862  | 0.997594837 | 0.99997156 | 14126/19094                                                                                                                                                                                                                                                 | 2  |
| mmu04922 | Glucagon signaling pathway                        | 4/807  | 82/5862  | 0.997681032 | 0.99997156 | 68263/108079/231991/15469                                                                                                                                                                                                                                   | 4  |
| mmu04380 | Osteoclast differentiation                        | 7/807  | 117/5862 | 0.997924721 | 0.99997156 | 16818/11433/83433/21934/22034/19094/17060                                                                                                                                                                                                                   | 7  |
| mmu05170 | Human immunodeficiency virus 1 infection          | 14/807 | 189/5862 | 0.998048374 | 0.99997156 | 12502/54131/12503/14991/12504/72512/22034/18481/14681/12500/14697/66066/241656/19094                                                                                                                                                                        | 14 |
| mmu04152 | AMPK signaling pathway                            | 6/807  | 108/5862 | 0.998315219 | 0.99997156 | 72930/108079/20249/11549/231991/16367                                                                                                                                                                                                                       | 6  |
| mmu04910 | Insulin signaling pathway                         | 7/807  | 122/5862 | 0.998756401 | 0.99997156 | 216148/20104/108079/244416/228966/16367/105651                                                                                                                                                                                                              | 7  |
| mmu04720 | Long-term potentiation                            | 2/807  | 61/5862  | 0.998769647 | 0.99997156 | 432530/12288                                                                                                                                                                                                                                                | 2  |
| mmu0414- | Autophagy - animal                                | 8/807  | 134/5862 | 0.998888787 | 0.99997156 | 56716/22034/108079/57436/73683/226421/66922/16367                                                                                                                                                                                                           | 8  |
| mmu05017 | Spinocerebellar ataxia                            | 8/807  | 134/5862 | 0.998888787 | 0.99997156 | 21374/22123/66413/67089/22359/22065/114896/26441                                                                                                                                                                                                            | 8  |
| mmu04621 | NOD-like receptor signaling pathway               | 9/807  | 145/5862 | 0.99892283  | 0.99997156 | 54131/72512/22034/57436/66824/270151/216877/106759/19094                                                                                                                                                                                                    | 9  |
| mmu04120 | Ubiquitin mediated proteolysis                    | 8/807  | 138/5862 | 0.999258386 | 0.99997156 | 107986/17222/216080/78294/28000/22034/18854/69957                                                                                                                                                                                                           | 8  |
| mmu04666 | Fc gamma R-mediated phagocytosis                  | 3/807  | 89/5862  | 0.999799244 | 0.99997156 | 20259/74192/20698                                                                                                                                                                                                                                           | 3  |
| mmu04217 | Necroptosis                                       | 5/807  | 128/5862 | 0.999956446 | 0.99997156 | 11545/66824/106759/15267/319164                                                                                                                                                                                                                             | 5  |

|          |             |        |          |            |            |                                                                                                 |    |
|----------|-------------|--------|----------|------------|------------|-------------------------------------------------------------------------------------------------|----|
| mmu04144 | Endocytosis | 15/807 | 246/5862 | 0.99997156 | 0.99997156 | 71889/14991/74002/12765/74192/16574/22034/16186/67804/18854/103<br>967/14184/16572/15511/193740 | 15 |
|----------|-------------|--------|----------|------------|------------|-------------------------------------------------------------------------------------------------|----|

**Supplementary Table 5: Identified metabolites/ lipids list with their error in Da.**

| <b>(A) Metabolomics</b> |                  |                            |                        |              |                        |
|-------------------------|------------------|----------------------------|------------------------|--------------|------------------------|
| <b>Experimental m/z</b> | <b>Ret. Time</b> | <b>names</b>               | <b>Theoretical m/z</b> | <b>Delta</b> | <b>Ionization mode</b> |
| 76.0386                 | 7.04             | Glycine                    | 76.0393                | -0.0007      | Positive               |
| 90.055                  | 6.92             | L-Alanine                  | 90.05495               | 5E-05        | Positive               |
| 106.0498                | 7.41             | L-Serine                   | 106.04987              | -7E-05       | Positive               |
| 114.0653                | 3.16             | Creatinine                 | 114.06619              | -0.00089     | Positive               |
| 116.0703                | 6.87             | L-Proline                  | 116.07061              | -0.00031     | Positive               |
| 120.0653                | 7.12             | L-Homoserine               | 120.06552              | -0.00022     | Positive               |
| 123.0547                | 1.66             | Niacinamide                | 123.05529              | -0.00059     | Positive               |
| 130.0488                | 7.34             | Pyrrolidonecarboxylic acid | 130.04986              | -0.00106     | Positive               |
| 130.0854                | 8.19             | Pipecolic acid             | 130.08626              | -0.00086     | Positive               |
| 132.0765                | 6.92             | Creatine                   | 132.07675              | -0.00025     | Positive               |
| 132.102                 | 6.18             | L-Norleucine               | 132.10191              | 9E-05        | Positive               |
| 133.0601                | 7.48             | L-Asparagine               | 133.06077              | -0.00067     | Positive               |
| 133.097                 | 8.34             | Ornithine                  | 133.09715              | -0.00015     | Positive               |
| 137.0703                | 6.21             | N-Methylnicotinamide       | 137.07094              | -0.00064     | Positive               |
| 147.0766                | 7.34             | L-Glutamine                | 147.07641              | 0.00019      | Positive               |
| 147.1121                | 8.15             | L-Lysine                   | 147.11281              | -0.00071     | Positive               |
| 148.0598                | 7.06             | L-Glutamic acid            | 148.06044              | -0.00064     | Positive               |
| 150.0573                | 6.64             | L-Methionine               | 150.05833              | -0.00103     | Positive               |
| 156.0763                | 8.15             | L-Histidine                | 156.07675              | -0.00045     | Positive               |
| 162.1122                | 6.16             | L-Carnitine                | 162.11247              | -0.00027     | Positive               |
| 166.0538                | 7.44             | Methionine sulfoxide       | 166.05324              | 0.00056      | Positive               |
| 166.0864                | 6.2              | L-Phenylalanine            | 166.08626              | 0.00014      | Positive               |
| 170.0928                | 7.9              | 1-Methylhistidine          | 170.09241              | 0.00039      | Positive               |
| 175.1177                | 8.08             | L-Arginine                 | 175.11896              | -0.00126     | Positive               |
| 176.1014                | 7.49             | Citrulline                 | 176.10296              | -0.00156     | Positive               |
| 182.0814                | 6.74             | L-Tyrosine                 | 182.08117              | 0.00023      | Positive               |
| 188.0702                | 6.18             | Indoleacrylic acid         | 188.0706               | -0.0004      | Positive               |

|                       |      |                                |           |          |          |
|-----------------------|------|--------------------------------|-----------|----------|----------|
| 204.1239              | 3.78 | L-Acetylcarnitine              | 204.12303 | 0.00087  | Positive |
| 205.0969              | 6.2  | L-Tryptophan                   | 205.09715 | -0.00025 | Positive |
| 258.1103              | 7.61 | Glycerophosphocholine          | 258.11009 | 0.00021  | Positive |
| 261.0354              | 7.01 | Glucose 1-phosphate            | 261.037   | -0.0016  | Positive |
| 343.1233              | 6.98 | Alpha-Lactose                  | 343.12349 | -0.00019 | Positive |
| 348.0715              | 8.56 | Adenosine monophosphate        | 348.07036 | 0.00114  | Positive |
| 89.0234               | 1.49 | D-Lactic acid                  | 89.02442  | -0.00102 | Negative |
| 104.0335              | 7.36 | L-Serine                       | 104.03532 | -0.00182 | Negative |
| 124.0076              | 6.94 | Taurine                        | 124.0062  | 0.0014   | Negative |
| 129.0188              | 3.26 | Citraconic acid_Mesaconic acid | 129.01933 | -0.00053 | Negative |
| 129.0542              | 1.36 | Ketoleucine                    | 129.05571 | -0.00151 | Negative |
| 130.0873              | 6.18 | L-Leucine                      | 130.08736 | -6E-05   | Negative |
| 131.0454              | 7.44 | L-Asparagine                   | 131.04622 | -0.00082 | Negative |
| 145.0133              | 2.45 | Oxoglutaric acid               | 145.01425 | -0.00095 | Negative |
| 145.0609              | 7.28 | L-Glutamine                    | 145.06186 | -0.00096 | Negative |
| 145.0969              | 8.08 | L-Lysine                       | 145.09825 | -0.00135 | Negative |
| 147.0281              | 1.72 | Ribonolactone                  | 147.02989 | -0.00179 | Negative |
| 154.0611              | 8.05 | L-Histidine                    | 154.0622  | -0.0011  | Negative |
| 157.0369              | 6.11 | Allantoin                      | 157.03671 | 0.00019  | Negative |
| 164.0719              | 6.21 | L-Phenylalanine                | 164.0717  | 0.0002   | Negative |
| 166.0149              | 1.36 | Quinolinic acid                | 166.01457 | 0.00033  | Negative |
| 173.009               | 3.28 | trans-Aconitic acid            | 173.00916 | -0.00016 | Negative |
| 173.1042              | 7.96 | L-Arginine                     | 173.1044  | -0.0002  | Negative |
| 174.0887              | 7.43 | Citrulline                     | 174.08841 | 0.00029  | Negative |
| 179.0571              | 6.98 | D-Mannose                      | 179.05611 | 0.00099  | Negative |
| 191.019               | 7.2  | Citric acid                    | 191.01973 | -0.00073 | Negative |
| 195.0513              | 6.93 | Gluconic acid                  | 195.05103 | 0.00027  | Negative |
| 203.0824              | 6.18 | L-Tryptophan                   | 203.0826  | -0.0002  | Negative |
| 346.0578              | 8.52 | Adenosine monophosphate        | 346.0558  | 0.002    | Negative |
|                       |      |                                |           |          |          |
| <b>(B) Lipidomics</b> |      |                                |           |          |          |

| Experimental m/z | Ret. Time | Name     | Theoretical m/z by LIPID MAPS | Delta  | Mode     |
|------------------|-----------|----------|-------------------------------|--------|----------|
| 1020.8003        | 11.73     | TG 64:14 | 1020.8015                     | 0.0012 | Positive |
| 973.7261         | 11.95     | TG 62:15 | 973.728                       | 0.0019 | Positive |
| 996.8016         | 12.54     | TG 62:12 | 996.8015                      | 0.0001 | Positive |
| 998.8178         | 12.66     | TG 62:11 | 998.8171                      | 0.0007 | Positive |
| 961.8227         | 14.36     | TG 60:7  | 961.8219                      | 0.0008 | Positive |
| 968.7684         | 11.95     | TG 60:12 | 968.7702                      | 0.0018 | Positive |
| 953.7598         | 12.95     | TG 60:11 | 953.7593                      | 0.0005 | Positive |
| 970.7849         | 12.35     | TG 60:11 | 970.7858                      | 0.0009 | Positive |
| 972.8033         | 12.56     | TG 60:10 | 972.8015                      | 0.0018 | Positive |
| 929.7577         | 13.21     | TG 58:9  | 929.7593                      | 0.0016 | Positive |
| 948.8004         | 12.97     | TG 58:8  | 948.8015                      | 0.0011 | Positive |
| 950.8161         | 13.3      | TG 58:7  | 950.8171                      | 0.001  | Positive |
| 937.8238         | 14.83     | TG 58:5  | 937.8219                      | 0.0019 | Positive |
| 958.8806         | 14.87     | TG 58:3  | 958.8797                      | 0.0009 | Positive |
| 942.7555         | 11.78     | TG 58:11 | 942.7545                      | 0.001  | Positive |
| 944.7718         | 12.18     | TG 58:10 | 944.7702                      | 0.0016 | Positive |
| 932.7713         | 13.65     | TG 57:9  | 932.7702                      | 0.0011 | Positive |
| 942.849          | 14.16     | TG 57:4  | 942.8484                      | 0.0006 | Positive |
| 922.7843         | 12.82     | TG 56:7  | 922.7858                      | 0.0015 | Positive |
| 924.802          | 13.26     | TG 56:6  | 924.8015                      | 0.0005 | Positive |
| 930.8479         | 14.41     | TG 56:3  | 930.8484                      | 0.0005 | Positive |
| 916.7408         | 11.62     | TG 56:10 | 916.7389                      | 0.0019 | Positive |
| 891.742          | 13.3      | TG 55:7  | 891.7436                      | 0.0016 | Positive |
| 881.7606         | 13.01     | TG 54:5  | 881.7593                      | 0.0013 | Positive |
| 900.7998         | 13.5      | TG 54:4  | 900.8015                      | 0.0017 | Positive |
| 863.7137         | 12.75     | TG 53:7  | 863.7123                      | 0.0014 | Positive |
| 867.7444         | 13.72     | TG 53:5  | 867.7436                      | 0.0008 | Positive |
| 884.771          | 12.8      | TG 53:5  | 884.7702                      | 0.0008 | Positive |
| 886.7845         | 13.28     | TG 53:4  | 886.7858                      | 0.0013 | Positive |



|          |       |               |          |        |          |
|----------|-------|---------------|----------|--------|----------|
| 890.8159 | 14.19 | TG 53:2       | 890.8171 | 0.0012 | Positive |
| 866.7237 | 11.9  | TG 52:7       | 866.7232 | 0.0005 | Positive |
| 868.7378 | 12.19 | TG 52:6       | 868.7389 | 0.0011 | Positive |
| 870.7543 | 12.56 | TG 52:5       | 870.7545 | 0.0002 | Positive |
| 872.7102 | 11.14 | TG 52:4       | 872.7103 | 0.0001 | Positive |
| 857.7577 | 13.52 | TG 52:3       | 857.7593 | 0.0016 | Positive |
| 876.8014 | 13.97 | TG 52:2       | 876.8015 | 0.0001 | Positive |
| 878.8189 | 14.46 | TG 52:1       | 878.8171 | 0.0018 | Positive |
| 856.7146 | 10.89 | TG 51:5       | 856.7154 | 0.0008 | Positive |
| 860.7683 | 13.26 | TG 51:3       | 860.7702 | 0.0019 | Positive |
| 862.7854 | 13.69 | TG 51:2       | 862.7858 | 0.0004 | Positive |
| 846.7526 | 13    | TG 50:3       | 846.7545 | 0.0019 | Positive |
| 850.7849 | 14    | TG 50:1       | 850.7858 | 0.0009 | Positive |
| 832.7405 | 12.73 | TG 49:3       | 832.7389 | 0.0016 | Positive |
| 838.7875 | 14.26 | TG 49:0       | 838.7858 | 0.0017 | Positive |
| 816.7068 | 11.98 | TG 48:4       | 816.7076 | 0.0008 | Positive |
| 740.6749 | 12.45 | TG 42:0       | 740.6763 | 0.0014 | Positive |
| 712.6444 | 11.92 | TG 40:0       | 712.645  | 0.0006 | Positive |
| 684.6143 | 11.31 | TG 38:0       | 684.6137 | 0.0006 | Positive |
| 489.3567 | 3.49  | ST 30:3;O5    | 489.3574 | 0.0007 | Positive |
| 492.4058 | 7.41  | ST 30:2;O4    | 492.4047 | 0.0011 | Positive |
| 429.3721 | 7.45  | ST 29:2;O2    | 429.3727 | 0.0006 | Positive |
| 592.4577 | 7.56  | ST 29:2;O;Hex | 592.4572 | 0.0005 | Positive |
| 457.2956 | 2.59  | ST 28:5;O5    | 457.2948 | 0.0008 | Positive |
| 512.3358 | 3.55  | ST 28:2;O7    | 512.3582 | 0.0008 | Positive |
| 568.4587 | 7.65  | ST 27:0;O;Hex | 568.4572 | 0.0015 | Positive |
| 460.2684 | 2.31  | ST 26:6;O6    | 460.2694 | 0.001  | Positive |
| 369.2405 | 9.22  | ST 24:5;O3    | 369.2424 | 0.0019 | Positive |
| 369.2412 | 13.6  | ST 24:5;O3    | 369.2424 | 0.0012 | Positive |
| 371.2574 | 8.08  | ST 24:4;O3    | 371.2581 | 0.0007 | Positive |
| 389.2681 | 8.06  | ST 24:3;O4    | 389.2686 | 0.0005 | Positive |

|          |       |                     |          |        |          |
|----------|-------|---------------------|----------|--------|----------|
| 391.2831 | 6.23  | ST 24:2;O4          | 391.2843 | 0.0012 | Positive |
| 408.3091 | 5.5   | ST 24:2;O4          | 408.3108 | 0.0017 | Positive |
| 426.32   | 10.07 | ST 24:1;O5          | 426.3214 | 0.0014 | Positive |
| 363.2183 | 4.29  | ST 21:3;O5          | 363.2166 | 0.0017 | Positive |
| 347.2209 | 1.67  | ST 21:3;O4          | 347.2217 | 0.0008 | Positive |
| 302.2474 | 4.92  | ST 20:3;O           | 302.2478 | 0.0004 | Positive |
| 338.232  | 4.37  | ST 19:2;O4          | 338.2326 | 0.0006 | Positive |
| 798.5392 | 8.8   | SQDG 30:0           | 798.5396 | 0.0004 | Positive |
| 288.2895 | 2.75  | SPB 17:0;O2         | 288.2897 | 0.0002 | Positive |
| 274.2736 | 2.27  | SPB 16:0;O2         | 274.274  | 0.0004 | Positive |
| 829.7157 | 10.88 | SM 43:1;O2          | 829.7157 | 0      | Positive |
| 811.6683 | 9.5   | SM 42:3;2           | 811.6687 | 0.0004 | Positive |
| 813.6846 | 10.04 | SM 42:2;2           | 813.6844 | 0.0002 | Positive |
| 815.6986 | 10.68 | SM 40:3;4           | 815.7    | 0.0014 | Positive |
| 799.6673 | 9.75  | SM 40:3;3           | 799.6687 | 0.0014 | Positive |
| 785.6542 | 9.54  | SM 40:2;2           | 785.6531 | 0.0011 | Positive |
| 804.6948 | 10.42 | SM 40:1;O2          | 804.6953 | 0.0005 | Positive |
| 757.6236 | 9.64  | SM 38:2;O2          | 757.6218 | 0.0018 | Positive |
| 727.5736 | 7.59  | SM 36:3;O2          | 727.5748 | 0.0012 | Positive |
| 729.5909 | 8.14  | SM 36:2;2           | 729.5905 | 0.0004 | Positive |
| 717.5906 | 14.89 | SM 35:1;O2          | 717.5905 | 0.0001 | Positive |
| 701.5577 | 7.45  | SM 34:2;2           | 701.5592 | 0.0015 | Positive |
| 703.5751 | 8.07  | SM 34:1;2           | 703.5748 | 0.0003 | Positive |
| 705.5896 | 8.33  | SM 34:0;2           | 705.5905 | 0.0009 | Positive |
| 687.5454 | 13.95 | SM 33:2;O2          | 687.5435 | 0.0019 | Positive |
| 689.5603 | 7.72  | SM 33:1;O2          | 689.5592 | 0.0011 | Positive |
| 852.5863 | 9.53  | SHexCer 38:1;O3     | 852.5865 | 0.0002 | Positive |
| 824.5563 | 8.89  | SHexCer 36:1;O3     | 824.5552 | 0.0011 | Positive |
| 854.6275 | 8.67  | PS O-42:4_PG O-42:6 | 854.6269 | 0.0006 | Positive |
| 856.6428 | 9.3   | PS O-42:3_PG O-42:5 | 856.6426 | 0.0002 | Positive |
| 828.6113 | 8.67  | PS O-40:3_PG O-40:5 | 828.6113 | 0      | Positive |

|          |       |                     |          |        |          |
|----------|-------|---------------------|----------|--------|----------|
| 800.5812 | 9.21  | PS O-38:3_PG O-38:5 | 800.58   | 0.0012 | Positive |
| 802.5972 | 7.94  | PS O-38:2_PG O-38:4 | 802.5956 | 0.0016 | Positive |
| 772.5503 | 7.19  | PS O-36:3_PG O-36:5 | 772.5487 | 0.0016 | Positive |
| 730.5003 | 8.24  | PS O-33:3           | 730.5017 | 0.0014 | Positive |
| 734.5332 | 12.82 | PS O-33:1_PG O-33:3 | 734.533  | 0.0002 | Positive |
| 721.5109 | 9.01  | PS O-31:2           | 721.5126 | 0.0017 | Positive |
| 707.4979 | 9.36  | PS O-30:2           | 707.497  | 0.0009 | Positive |
| 709.5116 | 14.07 | PS O-30:1           | 709.5126 | 0.001  | Positive |
| 911.6493 | 11.66 | PS 44:5             | 911.6484 | 0.0009 | Positive |
| 915.6801 | 12.15 | PS 44:3             | 915.6797 | 0.0004 | Positive |
| 899.6487 | 11.6  | PS 43:4             | 899.6484 | 0.0003 | Positive |
| 903.6811 | 12.31 | PS 43:2             | 903.6797 | 0.0014 | Positive |
| 907.711  | 13.26 | PS 43:0             | 907.711  | 0      | Positive |
| 891.6811 | 12.69 | PS 42:1             | 891.6797 | 0.0014 | Positive |
| 879.68   | 12.78 | PS 41:0             | 879.6797 | 0.0003 | Positive |
| 848.636  | 10.23 | PS 40:0_PG 40:2     | 848.6375 | 0.0015 | Positive |
| 796.5107 | 7.67  | PS 37:5_PG 37:7     | 796.5123 | 0.0016 | Positive |
| 804.5734 | 8.74  | PS 37:1_PG 37:3     | 804.5749 | 0.0015 | Positive |
| 805.5692 | 8.87  | PS 36:2             | 805.5702 | 0.001  | Positive |
| 789.5404 | 8.15  | PS 35:3             | 789.5389 | 0.0015 | Positive |
| 695.3528 | 9.76  | PS 25:4;O3          | 695.3515 | 0.0013 | Positive |
| 808.6229 | 10.02 | plasmeyl-PE 42:4    | 808.6215 | 0.0014 | Positive |
| 748.5282 | 8.37  | plasmeyl-PE 38:6    | 748.5276 | 0.0006 | Positive |
| 758.6064 | 10.18 | plasmeyl-PE 38:1    | 758.6058 | 0.0006 | Positive |
| 724.49   | 9.67  | plasmeyl-PE 36:4    | 724.4912 | 0.0012 | Positive |
| 724.5275 | 8.6   | plasmeyl-PE 36:4    | 724.5276 | 0.0001 | Positive |
| 730.5362 | 7.52  | plasmeyl-PE 36:1    | 730.5381 | 0.0019 | Positive |
| 730.5748 | 9.56  | plasmeyl-PE 36:1    | 730.5745 | 0.0003 | Positive |
| 702.5418 | 8.9   | plasmeyl-PE 34:1    | 702.5432 | 0.0014 | Positive |
| 847.6768 | 12.05 | PG O-42:1           | 847.6786 | 0.0018 | Positive |
| 807.5521 | 7.09  | PG O-40:7           | 807.5534 | 0.0013 | Positive |

|          |       |                         |          |        |          |
|----------|-------|-------------------------|----------|--------|----------|
| 733.5384 | 13.97 | PG O-34:2               | 733.5378 | 0.0006 | Positive |
| 831.6104 | 9.64  | PG 40:2                 | 831.611  | 0.0006 | Positive |
| 850.6533 | 10.87 | PG 40:1                 | 850.6532 | 0.0001 | Positive |
| 821.6279 | 8.94  | PG 39:0                 | 821.6266 | 0.0013 | Positive |
| 822.6204 | 10.29 | PG 38:1                 | 822.6219 | 0.0015 | Positive |
| 723.5164 | 13.33 | PG 32:0                 | 723.5171 | 0.0007 | Positive |
| 698.497  | 7.38  | PG 29:0                 | 698.4967 | 0.0003 | Positive |
| 670.4644 | 7.37  | PG 27:0                 | 670.4654 | 0.001  | Positive |
| 642.4337 | 6.73  | PG 25:0                 | 642.4341 | 0.0004 | Positive |
| 754.5742 | 9.4   | PE O-38:4               | 754.5745 | 0.0003 | Positive |
| 717.5539 | 7.23  | PE O-34:3               | 717.5541 | 0.0002 | Positive |
| 691.5376 | 7.14  | PE O-32:2               | 691.5385 | 0.0009 | Positive |
| 790.5726 | 8.12  | PE 40:7                 | 790.5745 | 0.0019 | Positive |
| 762.5988 | 9.38  | PE 38:7                 | 762.6007 | 0.0019 | Positive |
| 768.554  | 8.94  | PE 38:4                 | 768.5538 | 0.0002 | Positive |
| 772.584  | 8.53  | PE 38:2                 | 772.5851 | 0.0011 | Positive |
| 772.6211 | 9.73  | PE 38:2                 | 772.6215 | 0.0004 | Positive |
| 774.5451 | 8.39  | PE 38:1                 | 774.5432 | 0.0019 | Positive |
| 754.5385 | 8.58  | PE 37:4                 | 754.5381 | 0.0004 | Positive |
| 742.5372 | 7.47  | PE 36:3                 | 742.5381 | 0.0009 | Positive |
| 744.5546 | 7.85  | PE 36:2                 | 744.5538 | 0.0008 | Positive |
| 744.5891 | 8.62  | PE 36:2                 | 744.5902 | 0.0011 | Positive |
| 746.5696 | 8.4   | PE 36:1_PC 33:1_PA 38:2 | 746.5694 | 0.0002 | Positive |
| 716.5224 | 8.42  | PE 34:2                 | 716.5225 | 0.0001 | Positive |
| 718.5753 | 9.07  | PE 34:1                 | 718.5745 | 0.0008 | Positive |
| 686.4742 | 8.27  | PE 32:3                 | 686.4755 | 0.0013 | Positive |
| 664.4907 | 8.22  | PE 30:0                 | 664.4912 | 0.0005 | Positive |
| 820.6221 | 8.92  | PC O-40:6               | 820.6215 | 0.0006 | Positive |
| 826.6698 | 9.88  | PC O-40:3               | 826.6684 | 0.0014 | Positive |
| 794.6063 | 8.49  | PC O-38:5               | 794.6058 | 0.0005 | Positive |
| 798.6369 | 9.82  | PC O-38:3               | 798.6371 | 0.0002 | Positive |

|          |       |                     |          |        |          |
|----------|-------|---------------------|----------|--------|----------|
| 782.6064 | 9.8   | PC O-37:4_PE O-40:4 | 782.6058 | 0.0006 | Positive |
| 719.5705 | 7.84  | PC O-31:2           | 719.5698 | 0.0007 | Positive |
| 723.6016 | 14.06 | PC O-31:0_PE O-34:0 | 723.6011 | 0.0005 | Positive |
| 705.5551 | 7.5   | PC O-30:2           | 705.5541 | 0.001  | Positive |
| 693.5538 | 13.13 | PC O-29:1_PE O-32:1 | 693.5541 | 0.0003 | Positive |
| 878.5703 | 7.59  | PC 44:12            | 878.5694 | 0.0009 | Positive |
| 905.7662 | 12.84 | PC 43:0             | 905.7681 | 0.0019 | Positive |
| 856.5845 | 7.62  | PC 42:9             | 856.5851 | 0.0006 | Positive |
| 858.6007 | 8.97  | PC 42:8             | 858.6007 | 0      | Positive |
| 860.6151 | 9.18  | PC 42:7             | 860.6164 | 0.0013 | Positive |
| 864.6459 | 9.37  | PC 42:5             | 864.6477 | 0.0018 | Positive |
| 870.6947 | 10.68 | PC 42:2             | 870.6946 | 0.0001 | Positive |
| 854.5676 | 8.92  | PC 42:10            | 854.5694 | 0.0018 | Positive |
| 850.6675 | 9.78  | PC 41:5             | 850.6684 | 0.0009 | Positive |
| 854.5692 | 7.19  | PC 41:3             | 854.5694 | 0.0002 | Positive |
| 830.5679 | 7.35  | PC 40:8             | 830.5694 | 0.0015 | Positive |
| 832.5851 | 8.68  | PC 40:7             | 832.5851 | 0      | Positive |
| 834.5998 | 9.04  | PC 40:6             | 834.6007 | 0.0009 | Positive |
| 833.5815 | 8.52  | PC 39:8_PE 42:8     | 833.5803 | 0.0012 | Positive |
| 818.5701 | 7.56  | PC 39:7             | 818.5694 | 0.0007 | Positive |
| 822.6012 | 9.21  | PC 39:5_PE 42:5     | 822.6007 | 0.0005 | Positive |
| 824.6537 | 9.8   | PC 39:4             | 824.6528 | 0.0009 | Positive |
| 826.6319 | 9.36  | PC 39:3             | 826.632  | 0.0001 | Positive |
| 830.6635 | 10.26 | PC 39:1             | 830.6633 | 0.0002 | Positive |
| 804.5541 | 7.24  | PC 38:7             | 804.5538 | 0.0003 | Positive |
| 806.5703 | 7.81  | PC 38:6             | 806.5694 | 0.0009 | Positive |
| 808.5866 | 8.08  | PC 38:5             | 808.5851 | 0.0015 | Positive |
| 810.6005 | 8.72  | PC 38:4             | 810.6007 | 0.0002 | Positive |
| 812.6153 | 9.03  | PC 38:3             | 812.6164 | 0.0011 | Positive |
| 818.6045 | 8.83  | PC 38:0             | 818.6058 | 0.0013 | Positive |
| 790.5363 | 8.94  | PC 37:7             | 790.5381 | 0.0018 | Positive |

|          |       |                       |          |        |          |
|----------|-------|-----------------------|----------|--------|----------|
| 792.5888 | 7.95  | PC 37:6               | 792.5902 | 0.0014 | Positive |
| 811.5971 | 9.42  | PC 37:5_PE 40:5       | 811.598  | 0.0011 | Positive |
| 796.62   | 9.16  | PC 37:4               | 796.6215 | 0.0015 | Positive |
| 802.631  | 9.73  | PC 37:1_PE 40:1       | 802.632  | 0.001  | Positive |
| 829.57   | 8.72  | PC 36:5;O2_PS 38:4    | 829.5702 | 0.0002 | Positive |
| 782.5698 | 8.04  | PC 36:4               | 782.5694 | 0.0004 | Positive |
| 786.5059 | 8.03  | PC 36:2               | 786.5068 | 0.0009 | Positive |
| 786.5995 | 8.87  | PC 36:2               | 786.6007 | 0.0012 | Positive |
| 788.6174 | 9.4   | PC 36:1               | 788.6164 | 0.001  | Positive |
| 790.6325 | 10.01 | PC 36:0               | 790.632  | 0.0005 | Positive |
| 766.5375 | 7.85  | PC 35:5               | 766.5381 | 0.0006 | Positive |
| 766.5739 | 8.36  | PC 35:5               | 766.5745 | 0.0006 | Positive |
| 768.5538 | 7.71  | PC 35:4               | 768.5538 | 0      | Positive |
| 787.5959 | 8.34  | PC 35:3               | 787.596  | 0.0001 | Positive |
| 774.601  | 9.08  | PC 35:1               | 774.6007 | 0.0003 | Positive |
| 776.6535 | 10.41 | PC 35:0               | 776.6528 | 0.0007 | Positive |
| 754.5371 | 8.1   | PC 34:4               | 754.5381 | 0.001  | Positive |
| 758.5694 | 8.19  | PC 34:2               | 758.5694 | 0      | Positive |
| 760.585  | 8.76  | PC 34:1               | 760.5851 | 0.0001 | Positive |
| 748.5831 | 9.03  | PC 33:0               | 748.5851 | 0.002  | Positive |
| 704.4482 | 8.28  | PC 30:1               | 704.4497 | 0.0015 | Positive |
| 679.4306 | 9.69  | PC 25:3;O2_PE 28:3;O2 | 679.4293 | 0.0013 | Positive |
| 666.4352 | 4.84  | PC 25:1;O2_PS 27:0    | 666.4341 | 0.0011 | Positive |
| 627.3999 | 9.67  | PC 21:1;O2            | 627.398  | 0.0019 | Positive |
| 319.284  | 4.86  | MG O-15:0;O           | 319.2843 | 0.0003 | Positive |
| 336.3102 | 4.86  | MG O-15:0;O           | 336.3108 | 0.0006 | Positive |
| 376.343  | 5.46  | MG 18:0_MG O-18:1;O   | 376.3421 | 0.0009 | Positive |
| 331.2851 | 5.48  | MG 16:0_MG O-16:1;O   | 331.2843 | 0.0008 | Positive |
| 526.294  | 3.84  | LPE 22:6              | 526.2928 | 0.0012 | Positive |
| 478.2942 | 4.1   | LPE 18:2              | 478.2928 | 0.0014 | Positive |
| 606.4497 | 6.59  | LPC 24:1              | 606.4493 | 0.0004 | Positive |

|          |      |                        |          |        |          |
|----------|------|------------------------|----------|--------|----------|
| 608.4631 | 7.3  | LPC 24:0               | 608.465  | 0.0019 | Positive |
| 594.4482 | 6.95 | LPC 23:0               | 594.4493 | 0.0011 | Positive |
| 568.3396 | 3.73 | LPC 22:6               | 568.3398 | 0.0003 | Positive |
| 572.3716 | 4.57 | LPC 22:4               | 572.3711 | 0.0005 | Positive |
| 578.4172 | 5.92 | LPC 22:1               | 578.418  | 0.0008 | Positive |
| 580.4323 | 6.61 | LPC 22:0               | 580.4337 | 0.0014 | Positive |
| 542.3234 | 3.99 | LPC 20:5               | 542.3241 | 0.0007 | Positive |
| 544.3384 | 3.91 | LPC 20:4               | 544.3398 | 0.0014 | Positive |
| 546.3544 | 4.35 | LPC 20:3               | 546.3554 | 0.001  | Positive |
| 548.3716 | 4.74 | LPC 20:2               | 548.3711 | 0.0005 | Positive |
| 550.3856 | 5.23 | LPC 20:1               | 550.3867 | 0.0011 | Positive |
| 552.4018 | 5.89 | LPC 20:0               | 552.4024 | 0.0006 | Positive |
| 538.3861 | 5.53 | LPC 19:0               | 538.3867 | 0.0006 | Positive |
| 518.3235 | 3.29 | LPC 18:3               | 518.3241 | 0.0006 | Positive |
| 520.3395 | 3.99 | LPC 18:2               | 520.3398 | 0.0003 | Positive |
| 522.3546 | 4.6  | LPC 18:1               | 522.3554 | 0.0008 | Positive |
| 524.3705 | 5.18 | LPC 18:0               | 524.3711 | 0.0006 | Positive |
| 508.3379 | 4.24 | LPC 17:1               | 508.3398 | 0.0019 | Positive |
| 510.3544 | 4.82 | LPC 17:0               | 510.3554 | 0.001  | Positive |
| 494.3237 | 3.56 | LPC 16:1               | 494.3241 | 0.0004 | Positive |
| 496.3399 | 4.45 | LPC 16:0               | 496.3398 | 0.0001 | Positive |
| 482.3234 | 5.28 | LPC 15:0               | 482.3241 | 0.0007 | Positive |
| 482.359  | 4.76 | LPC 15:0               | 482.3605 | 0.0015 | Positive |
| 468.3089 | 3.17 | LPC 14:0               | 468.3085 | 0.0004 | Positive |
| 454.2923 | 2.6  | LPC 13:0               | 454.2928 | 0.0005 | Positive |
| 683.4973 | 7.94 | LPS O-28:1;O_PS O-28:0 | 683.497  | 0.0003 | Positive |
| 655.4662 | 9.07 | LPS O-26:1;O           | 655.4657 | 0.0005 | Positive |
| 583.3195 | 9.82 | LPS O-22:0;O_LPG 22:1  | 584.3922 | 0.0012 | Positive |
| 540.3656 | 4.67 | LPS O-20:0             | 540.366  | 0.0004 | Positive |
| 512.334  | 1.7  | LPS O-18:0             | 512.3347 | 0.0007 | Positive |
| 503.3089 | 2.31 | LPS O-15:0;O           | 503.3092 | 0.0003 | Positive |

|          |       |                       |          |        |          |
|----------|-------|-----------------------|----------|--------|----------|
| 537.2931 | 4.47  | LPS 18:3              | 537.2935 | 0.0004 | Positive |
| 515.3086 | 4.49  | LPS 16:0_LPS O-16:1;O | 515.3092 | 0.0006 | Positive |
| 555.3638 | 9.05  | LPG 21:0              | 555.3656 | 0.0018 | Positive |
| 488.2991 | 2.31  | LPG 15:0              | 488.2983 | 0.0008 | Positive |
| 460.2659 | 4.14  | LPG 13:0              | 460.267  | 0.0011 | Positive |
| 460.2677 | 13.84 | LPG 13:0              | 460.267  | 0.0007 | Positive |
| 446.2528 | 14.76 | LPG 12:0              | 446.2513 | 0.0015 | Positive |
| 564.4009 | 5.54  | LPE 24:1              | 564.4024 | 0.0015 | Positive |
| 504.3093 | 5.26  | LPE 20:3              | 504.3085 | 0.0008 | Positive |
| 536.4088 | 5.56  | LPC O-20:1            | 536.4074 | 0.0014 | Positive |
| 508.3748 | 4.88  | LPC O-18:1            | 508.3761 | 0.0013 | Positive |
| 413.2782 | 8.87  | LPC O-10:1            | 413.2775 | 0.0007 | Positive |
| 812.697  | 10.87 | HexCer 42:1;2         | 812.6974 | 0.0004 | Positive |
| 798.6835 | 10.59 | HexCer 41:1;O2        | 798.6817 | 0.0018 | Positive |
| 784.6671 | 10.3  | HexCer 40:1;2         | 784.6661 | 0.001  | Positive |
| 731.5776 | 9.57  | HexCer 34:2;O3        | 731.578  | 0.0004 | Positive |
| 701.5655 | 14.16 | HexCer 33:2;O2        | 701.5674 | 0.0019 | Positive |
| 888.6414 | 9.12  | Hex2Cer 36:2;O2       | 888.6407 | 0.0007 | Positive |
| 892.6708 | 9.95  | Hex2Cer 36:0;O2       | 892.672  | 0.0012 | Positive |
| 551.5029 | 13.52 | DG O-32:2             | 551.5034 | 0.0005 | Positive |
| 738.6048 | 12.21 | DG 44:8               | 738.6031 | 0.0017 | Positive |
| 742.6326 | 12.38 | DG 44:6               | 742.6344 | 0.0018 | Positive |
| 714.6037 | 12.46 | DG 42:6               | 714.6031 | 0.0006 | Positive |
| 687.4975 | 10.31 | DG 42:11              | 687.4983 | 0.0008 | Positive |
| 686.5699 | 9.38  | DG 40:6               | 686.5718 | 0.0019 | Positive |
| 696.6514 | 9.47  | DG 40:1               | 696.65   | 0.0014 | Positive |
| 639.4966 | 9.07  | DG 38:7               | 639.4983 | 0.0017 | Positive |
| 660.556  | 9.43  | DG 38:5               | 660.5561 | 0.0001 | Positive |
| 664.5874 | 9.62  | DG 38:3               | 664.5874 | 0      | Positive |
| 634.5396 | 9.06  | DG 36:4               | 634.5405 | 0.0009 | Positive |
| 636.5556 | 9.61  | DG 36:3               | 636.5561 | 0.0005 | Positive |



|          |       |                         |          |        |          |
|----------|-------|-------------------------|----------|--------|----------|
| 640.5872 | 10.71 | DG 36:1                 | 640.5874 | 0.0002 | Positive |
| 625.5754 | 8.01  | DG 36:0                 | 625.5765 | 0.0011 | Positive |
| 591.4964 | 10.08 | DG 34:3                 | 591.4983 | 0.0019 | Positive |
| 610.5392 | 9.61  | DG 34:2                 | 610.5405 | 0.0013 | Positive |
| 597.5468 | 10.71 | DG 34:0                 | 597.5452 | 0.0016 | Positive |
| 569.513  | 10.09 | DG 32:0                 | 569.5139 | 0.0009 | Positive |
| 925.52   | 7.96  | CL 36:4                 | 925.5202 | 0.0002 | Positive |
| 506.3615 | 4.35  | CerP 26:1;O2_LPC O-18:2 | 506.3605 | 0.001  | Positive |
| 506.3615 | 5.17  | CerP 26:1;O2_LPC O-18:2 | 506.3605 | 0.001  | Positive |
| 632.634  | 11.52 | Cer 42:2;O              | 632.634  | 0      | Positive |
| 622.6114 | 10.91 | Cer 40:1;O2             | 622.6133 | 0.0019 | Positive |
| 642.603  | 11.27 | Cer 39:0;O4_DG 36:0     | 642.6031 | 0.0001 | Positive |
| 584.5611 | 11.59 | Cer 36:0;O3             | 584.5612 | 0.0001 | Positive |
| 568.566  | 9.67  | Cer 36:0;O2             | 568.5663 | 0.0003 | Positive |
| 540.5334 | 8.87  | Cer 34:0;O2             | 540.535  | 0.0016 | Positive |
| 714.6179 | 13.27 | CE(22:6)                | 714.6183 | 0.0004 | Positive |
| 694.6485 | 14.36 | CE(20:2)                | 694.6496 | 0.0011 | Positive |
| 664.6017 | 13.46 | CE(18:3)                | 664.6027 | 0.001  | Positive |
| 666.6185 | 13.99 | CE(18:2)                | 666.6183 | 0.0002 | Positive |
| 668.633  | 14.5  | CE(18:1)                | 668.634  | 0.001  | Positive |
| 668.6556 | 11.19 | CE(18:1)                | 668.6551 | 0.0005 | Positive |
| 699.606  | 14.36 | CE 22:5                 | 699.6075 | 0.0015 | Positive |
| 675.6088 | 13.91 | CE 20:3                 | 675.6075 | 0.0014 | Positive |
| 696.6648 | 14.51 | CE 20:1                 | 696.6653 | 0.0005 | Positive |
| 647.5769 | 14.58 | CE 18:3                 | 647.5762 | 0.0008 | Positive |
| 649.5905 | 13.96 | CE 18:2                 | 649.5918 | 0.0013 | Positive |
| 642.6179 | 14.58 | CE 16:0                 | 642.6183 | 0.0004 | Positive |
| 628.6028 | 10.31 | CE 15:0                 | 628.6027 | 0.0001 | Positive |
| 302.1961 | 1.22  | CAR 8:1;O               | 302.1962 | 0.0001 | Positive |
| 305.2439 | 13.61 | CAR 8:0                 | 305.2435 | 0.0004 | Positive |
| 279.1567 | 4.03  | CAR 4:1;O2              | 279.1551 | 0.0016 | Positive |

|          |      |                                                       |          |        |          |
|----------|------|-------------------------------------------------------|----------|--------|----------|
| 448.3422 | 4.18 | CAR 20:4_ST 27:3;O4_ST 28:2;O4                        | 448.3421 | 0.0001 | Positive |
| 204.1218 | 1.2  | CAR 2:0                                               | 204.123  | 0.0012 | Positive |
| 458.3467 | 4.51 | CAR 18:1;O2                                           | 458.3476 | 0.0009 | Positive |
| 426.3596 | 4.66 | CAR 18:1                                              | 426.3578 | 0.0018 | Positive |
| 431.3855 | 5.49 | CAR 17:0                                              | 431.3843 | 0.0012 | Positive |
| 396.3091 | 3.16 | CAR 16:2_ST 23:1;O4                                   | 396.3108 | 0.0017 | Positive |
| 447.3431 | 7.47 | CAR 16:1;O2                                           | 447.3429 | 0.0002 | Positive |
| 400.3411 | 4.55 | CAR 16:0                                              | 400.3421 | 0.001  | Positive |
| 370.294  | 2.85 | CAR 14:1                                              | 370.2952 | 0.0012 | Positive |
| 191.0197 | 1.14 | FA 6:2;O5                                             | 191.0197 | 0      | Negative |
| 119.0338 | 1.2  | FA 4:0;O2                                             | 119.035  | 0.0012 | Negative |
| 113.0238 | 1.21 | FA 5:2;O                                              | 113.0244 | 0.0006 | Negative |
| 161.0442 | 1.21 | FA 6:1;O3_FA 5:1;O                                    | 161.0456 | 0.0014 | Negative |
| 179.0552 | 1.22 | FA 6:0;O4_FA 5:0;O2                                   | 179.0561 | 0.0009 | Negative |
| 225.0604 | 1.22 | FA 6:0;O4                                             | 225.0616 | 0.0012 | Negative |
| 205.0521 | 1.24 | FA 11:6;O2_FA 10:6                                    | 205.0506 | 0.0015 | Negative |
| 203.035  | 1.27 | FA 10:7                                               | 203.035  | 0      | Negative |
| 103.0403 | 1.29 | FA 4:0;O                                              | 103.0401 | 0.0002 | Negative |
| 391.2119 | 1.68 | FA 22:6;O4                                            | 391.2126 | 0.0007 | Negative |
| 420.2508 | 2.15 | CerP 20:1;O2                                          | 420.2521 | 0.0013 | Negative |
| 293.1759 | 2.34 | FA 16:4                                               | 293.1758 | 0.0001 | Negative |
| 239.1276 | 2.45 | FA 12:3                                               | 239.1289 | 0.0013 | Negative |
| 619.2898 | 2.76 | LPI 20:4                                              | 619.2889 | 0.0009 | Negative |
| 512.2993 | 3.2  | LPS O-17:0;O_LPC 14:0_LPE 17:0_LPE O-17:1;O_PC O-14:0 | 512.2994 | 0.0001 | Negative |
| 562.3168 | 3.29 | LPC 18:3                                              | 562.3151 | 0.0017 | Negative |
| 538.3156 | 3.57 | LPS 19:0_LPS O-19:1;O_LPC 16:1_LPE 19:1               | 538.3151 | 0.0005 | Negative |
| 612.3302 | 3.77 | LPC 22:6                                              | 612.3307 | 0.0005 | Negative |
| 524.2781 | 3.89 | LPE 22:6                                              | 524.2783 | 0.0002 | Negative |
| 588.3314 | 3.93 | LPC 20:4                                              | 588.3307 | 0.0007 | Negative |
| 528.3108 | 3.93 | LPE 22:4                                              | 528.3096 | 0.0012 | Negative |
| 526.3141 | 4    | LPC 15:0_LPE 18:0_LPE O-18:1;O                        | 526.3151 | 0.001  | Negative |

|          |      |                                          |          |        |          |
|----------|------|------------------------------------------|----------|--------|----------|
| 564.3289 | 4.02 | LPC 18:2                                 | 564.3307 | 0.0018 | Negative |
| 500.2784 | 4.03 | LPE 20:4                                 | 500.2783 | 0.0001 | Negative |
| 476.2798 | 4.13 | LPE 18:2                                 | 476.2783 | 0.0015 | Negative |
| 552.3296 | 4.25 | LPS 20:0_LPC 17:1_LPE 20:1               | 552.3307 | 0.0011 | Negative |
| 464.2788 | 4.29 | LPC 14:1_LPE 17:1                        | 464.2783 | 0.0005 | Negative |
| 526.294  | 4.35 | LPE 22:5                                 | 526.2939 | 0.0001 | Negative |
| 590.3456 | 4.36 | LPC 20:3                                 | 590.3464 | 0.0008 | Negative |
| 614.3455 | 4.38 | LPC 22:5                                 | 614.3464 | 0.0009 | Negative |
| 540.3304 | 4.48 | LPS 20:6                                 | 540.3307 | 0.0003 | Negative |
| 616.3617 | 4.48 | LPC 22:4                                 | 616.362  | 0.0003 | Negative |
| 480.3087 | 4.49 | LPE 18:0                                 | 480.3096 | 0.0009 | Negative |
| 625.2995 | 4.51 | PA 24:2;O3                               | 625.2995 | 0      | Negative |
| 566.3478 | 4.62 | PS 20:0                                  | 566.3464 | 0.0014 | Negative |
| 584.3587 | 4.67 | LPS O-20:0                               | 584.3569 | 0.0018 | Negative |
| 478.2936 | 4.71 | LPE 18:1                                 | 478.2939 | 0.0003 | Negative |
| 592.3601 | 4.76 | LPC 20:2_PC O-20:2                       | 592.362  | 0.0019 | Negative |
| 526.3509 | 4.77 | LPC O-16:0                               | 526.3514 | 0.0005 | Negative |
| 436.285  | 4.81 | LPE O-16:1                               | 436.2834 | 0.0016 | Negative |
| 554.3456 | 4.84 | LPS O-20:0;O_LPC 17:0_LPE 20:0_PC O-17:0 | 554.3464 | 0.0008 | Negative |
| 552.3667 | 4.88 | LPC O-18:1                               | 552.3671 | 0.0004 | Negative |
| 466.2941 | 4.92 | LPE 17:0                                 | 466.2939 | 0.0002 | Negative |
| 305.198  | 4.96 | FA 14:0;O2                               | 305.197  | 0.001  | Negative |
| 399.2749 | 4.99 | FA 21:2;O2                               | 399.2752 | 0.0003 | Negative |
| 594.3778 | 5.24 | LPC 20:1_PC O-20:1                       | 594.3777 | 0.0001 | Negative |
| 277.2182 | 5.26 | FA 18:3                                  | 277.2173 | 0.0009 | Negative |
| 548.2986 | 5.28 | LPS 20:2_LPE 20:3                        | 548.2994 | 0.0008 | Negative |
| 327.2327 | 5.33 | FA 22:6                                  | 327.233  | 0.0003 | Negative |
| 395.2204 | 5.35 | LPA 15:0                                 | 395.2204 | 0      | Negative |
| 333.2291 | 5.47 | FA 16:0;O2                               | 333.2283 | 0.0008 | Negative |
| 379.2321 | 5.47 | FA 18:0;O6                               | 379.2338 | 0.0017 | Negative |
| 375.277  | 5.48 | MG 16:0_MG O-16:1;O                      | 375.2752 | 0.0018 | Negative |

|          |      |                                          |          |        |          |
|----------|------|------------------------------------------|----------|--------|----------|
| 303.2341 | 5.51 | FA 20:4                                  | 303.233  | 0.0011 | Negative |
| 253.2159 | 5.51 | FA 16:1                                  | 253.2173 | 0.0014 | Negative |
| 582.377  | 5.54 | LPS O-22:0;O_LPC 19:0_LPE 22:0_PC O-19:0 | 582.3777 | 0.0007 | Negative |
| 279.2336 | 5.66 | FA 18:2                                  | 279.233  | 0.0006 | Negative |
| 325.2387 | 5.69 | FA 19:2;O2_FA 18:2                       | 325.2384 | 0.0003 | Negative |
| 409.1862 | 5.69 | FA 20:6;O4                               | 409.1868 | 0.0006 | Negative |
| 393.2087 | 5.69 | FA 24:10                                 | 393.2071 | 0.0016 | Negative |
| 329.2493 | 5.79 | FA 22:5                                  | 329.2486 | 0.0007 | Negative |
| 465.3059 | 5.79 | ST 27:1;O;S                              | 465.3044 | 0.0015 | Negative |
| 549.2687 | 5.79 | ST 28:5;O8                               | 549.2705 | 0.0018 | Negative |
| 305.2494 | 5.86 | FA 20:3                                  | 305.2486 | 0.0008 | Negative |
| 596.3942 | 5.89 | LPS O-23:0;O                             | 596.3933 | 0.0009 | Negative |
| 622.4099 | 5.89 | LPS O-25:1;O_LPC 22:1                    | 622.409  | 0.0009 | Negative |
| 331.2646 | 6.08 | FA 22:4                                  | 331.2643 | 0.0003 | Negative |
| 301.2377 | 6.18 | FA 17:0;O2_FA 16:0                       | 301.2384 | 0.0007 | Negative |
| 255.232  | 6.18 | FA 16:0                                  | 255.233  | 0.001  | Negative |
| 511.4749 | 6.18 | FA 31:0                                  | 511.4732 | 0.0017 | Negative |
| 449.3107 | 6.19 | FA 22:0;O4                               | 449.312  | 0.0013 | Negative |
| 493.3315 | 6.22 | LPA 22:0                                 | 493.33   | 0.0015 | Negative |
| 281.2481 | 6.25 | FA 18:1                                  | 281.2486 | 0.0005 | Negative |
| 327.2532 | 6.25 | FA 19:1;O2_FA 18:1                       | 327.2541 | 0.0009 | Negative |
| 582.4123 | 6.27 | LPC O-20:0                               | 582.414  | 0.0017 | Negative |
| 494.3634 | 6.42 | LPE 19:0                                 | 494.3616 | 0.0018 | Negative |
| 239.0568 | 6.88 | FA 10:5;O2                               | 239.0561 | 0.0007 | Negative |
| 283.2646 | 6.96 | FA 18:0                                  | 283.2643 | 0.0003 | Negative |
| 619.29   | 7.01 | LPI 20:4_PA 25:4;O2                      | 619.2889 | 0.0011 | Negative |
| 881.5185 | 7.15 | PI 38:6                                  | 881.5186 | 0.0001 | Negative |
| 822.5307 | 7.22 | PC 36:6                                  | 822.5291 | 0.0016 | Negative |
| 652.456  | 7.32 | LPC 24:0_LPE O-27:1;O                    | 652.4559 | 0.0001 | Negative |
| 951.5236 | 7.38 | PI 40:8                                  | 951.524  | 0.0004 | Negative |
| 719.5344 | 7.39 | SM 32:1;O2                               | 719.5345 | 0.0001 | Negative |

|          |      |                                   |          |        |          |
|----------|------|-----------------------------------|----------|--------|----------|
| 798.5279 | 7.39 | PC 34:4                           | 798.5291 | 0.0012 | Negative |
| 883.5336 | 7.4  | PI 38:5                           | 883.5342 | 0.0006 | Negative |
| 818.5543 | 7.45 | PS O-36:2                         | 818.5553 | 0.001  | Negative |
| 760.4911 | 7.47 | PE 38:7                           | 760.4923 | 0.0012 | Negative |
| 740.5275 | 7.59 | PE 36:3                           | 740.5236 | 0.0027 | Negative |
| 868.5334 | 7.63 | PS 39:5                           | 868.5345 | 0.0011 | Negative |
| 871.5335 | 7.66 | PI 37:4                           | 871.5342 | 0.0007 | Negative |
| 765.5806 | 7.71 | PA 41:4                           | 765.5804 | 0.0002 | Negative |
| 337.3127 | 7.72 | FA 22:1                           | 337.3112 | 0.0015 | Negative |
| 733.5518 | 7.73 | SM 33:1;O2                        | 733.5501 | 0.0017 | Negative |
| 847.535  | 7.79 | PI 35:2                           | 847.5342 | 0.0008 | Negative |
| 712.4934 | 7.82 | PE 34:3                           | 712.4923 | 0.0011 | Negative |
| 763.5525 | 7.85 | DG 44:9                           | 763.5518 | 0.0007 | Negative |
| 876.5775 | 7.87 | PC 40:7                           | 876.576  | 0.0015 | Negative |
| 969.513  | 7.99 | CL 36:4                           | 969.5111 | 0.0019 | Negative |
| 788.5217 | 8.07 | PE 40:7                           | 788.5236 | 0.0019 | Negative |
| 627.5001 | 8.08 | DG 37:5                           | 627.4994 | 0.0007 | Negative |
| 747.5647 | 8.09 | SM 34:1;O2                        | 747.5658 | 0.0011 | Negative |
| 750.5648 | 8.1  | PC O-31:0_PE O-34:0               | 750.5655 | 0.0007 | Negative |
| 773.5825 | 8.14 | SM 36:2;O2                        | 773.5814 | 0.0011 | Negative |
| 742.5386 | 8.19 | PE 36:2                           | 742.5392 | 0.0006 | Negative |
| 768.5555 | 8.24 | 768.5555_8.24                     | 768.5549 | 0.0006 | Negative |
| 662.475  | 8.24 | PE 30:0                           | 662.4766 | 0.0016 | Negative |
| 730.4664 | 8.28 | PS 32:2                           | 730.4665 | 0.0001 | Negative |
| 887.5671 | 8.29 | PI 38:3                           | 887.5655 | 0.0016 | Negative |
| 773.5338 | 8.4  | PG 36:2_PA 38:2                   | 773.5338 | 0      | Negative |
| 782.4981 | 8.42 | PS 36:4_PC 33:5_PE 36:5_PE O-40:2 | 782.4978 | 0.0003 | Negative |
| 913.5818 | 8.45 | PI 40:4                           | 913.5812 | 0.0006 | Negative |
| 868.5697 | 8.51 | PS O-40:5                         | 868.5709 | 0.0012 | Negative |
| 748.5287 | 8.52 | plasmeyl-PE 38:5                  | 748.5287 | 0      | Negative |
| 774.5442 | 8.52 | plasmeyl-PE 40:6                  | 774.5443 | 0.0001 | Negative |

|          |      |                               |          |        |          |
|----------|------|-------------------------------|----------|--------|----------|
| 377.2707 | 8.52 | FA 23:4;O2_FA 22:4            | 377.2697 | 0.001  | Negative |
| 595.3868 | 8.52 | ST 27:1;O4;Hex                | 595.3852 | 0.0016 | Negative |
| 553.3389 | 8.54 | ST 29:2;O7                    | 553.3382 | 0.0007 | Negative |
| 756.556  | 8.54 | PE 37:2                       | 756.5549 | 0.0011 | Negative |
| 806.545  | 8.55 | SHexCer 36:1;O2               | 806.5458 | 0.0008 | Negative |
| 518.3501 | 8.55 | CAR 22:5                      | 518.3487 | 0.0014 | Negative |
| 884.5674 | 8.55 | PS 40:4                       | 884.5658 | 0.0016 | Negative |
| 808.5489 | 8.57 | PC O-36:6                     | 808.5498 | 0.0009 | Negative |
| 722.5124 | 8.6  | plasmeyl-PE 36:4              | 722.513  | 0.0006 | Negative |
| 790.5405 | 8.69 | PE 40:6                       | 790.5392 | 0.0013 | Negative |
| 778.5616 | 8.71 | PC 32:0                       | 778.5604 | 0.0012 | Negative |
| 854.5925 | 8.72 | PC 38:4                       | 854.5917 | 0.0008 | Negative |
| 718.5383 | 8.74 | PE 34:0                       | 718.5392 | 0.0009 | Negative |
| 744.5646 | 8.74 | HexCer 34:1;O2                | 744.5631 | 0.0015 | Negative |
| 698.5121 | 8.8  | plasmeyl-PE 34:2              | 698.513  | 0.0009 | Negative |
| 775.5952 | 8.8  | SM 36:1;O2                    | 775.5971 | 0.0019 | Negative |
| 700.5289 | 8.89 | plasmeyl-PE 34:1              | 700.5287 | 0.0002 | Negative |
| 864.6138 | 8.95 | PC O-40:6                     | 864.6124 | 0.0014 | Negative |
| 796.5868 | 9.04 | PE 40:3                       | 796.5862 | 0.0006 | Negative |
| 762.5663 | 9.06 | PS O-35:0_PC O-32:1_PE O-35:1 | 762.5655 | 0.0008 | Negative |
| 936.5969 | 9.1  | PS 44:6                       | 936.5971 | 0.0002 | Negative |
| 744.5563 | 9.12 | PE 36:1                       | 744.5549 | 0.0014 | Negative |
| 776.5603 | 9.18 | plasmeyl-PE 40:5              | 776.56   | 0.0003 | Negative |
| 768.5544 | 9.26 | PE 38:3                       | 768.5549 | 0.0005 | Negative |
| 874.5827 | 9.38 | PS 39:2                       | 874.5815 | 0.0012 | Negative |
| 786.6024 | 9.41 | PE 39:1                       | 786.6018 | 0.0006 | Negative |
| 900.5989 | 9.42 | PS 41:3                       | 900.5971 | 0.0018 | Negative |
| 824.5817 | 9.43 | PS O-40:4_PE O-40:5           | 824.5811 | 0.0006 | Negative |
| 756.562  | 9.44 | HexCer 35:2;O2                | 756.5631 | 0.0011 | Negative |
| 829.643  | 9.45 | PE 42:0                       | 829.644  | 0.001  | Negative |
| 819.6132 | 9.47 | PG 39:0_PA 41:0               | 819.6121 | 0.0011 | Negative |

|          |       |                  |          |        |          |
|----------|-------|------------------|----------|--------|----------|
| 702.5454 | 9.48  | PE O-34:1        | 702.5443 | 0.0011 | Negative |
| 855.6616 | 9.5   | SM 42:3;O2       | 855.6597 | 0.0019 | Negative |
| 939.6176 | 9.54  | PI 38:0          | 939.6179 | 0.0003 | Negative |
| 858.6248 | 9.55  | PC 38:2          | 858.623  | 0.0018 | Negative |
| 770.5707 | 9.62  | PE 38:2          | 770.5705 | 0.0002 | Negative |
| 866.6294 | 9.69  | PC O-40:5        | 866.6281 | 0.0013 | Negative |
| 802.5756 | 9.71  | plasmeyl-PE 42:6 | 802.5756 | 0      | Negative |
| 846.6236 | 9.72  | PC 37:1          | 846.623  | 0.0006 | Negative |
| 900.5749 | 9.75  | PC 42:9          | 900.576  | 0.0011 | Negative |
| 788.6165 | 9.94  | PE 39:0          | 788.6175 | 0.001  | Negative |
| 609.5603 | 9.96  | CE 15:0          | 609.5616 | 0.0013 | Negative |
| 834.6226 | 10    | PC 36:0          | 834.623  | 0.0004 | Negative |
| 862.6547 | 10.01 | PC 38:0          | 862.6543 | 0.0004 | Negative |
| 730.5759 | 10.06 | PE O-36:1        | 730.5756 | 0.0003 | Negative |
| 857.6767 | 10.06 | SM 42:2;O2       | 857.6753 | 0.0014 | Negative |
| 847.6421 | 10.09 | PG 41:0_PA 43:0  | 847.6434 | 0.0013 | Negative |
| 886.6556 | 10.12 | PC 40:2          | 886.6543 | 0.0013 | Negative |
| 844.644  | 10.23 | PS 40:1          | 844.6437 | 0.0003 | Negative |
| 808.622  | 10.44 | PE O-42:4        | 808.6226 | 0.0006 | Negative |
| 859.6927 | 10.71 | SM 42:1;O2       | 859.691  | 0.0017 | Negative |
| 806.593  | 10.88 | PC 34:0          | 806.5917 | 0.0013 | Negative |
| 712.6463 | 11.19 | Cer 42:0;O3      | 712.6461 | 0.0002 | Negative |
| 711.6286 | 11.51 | CE 19:0          | 711.6297 | 0.0011 | Negative |

**Supplementary Table 6:** List of significantly changed metabolites and lipids in LD group and HD group using univariate analysis (two tailed student's t test).

| Identified significant features | C vs. LD |             |          |             |          | C vs. HD |            |          |             |          |
|---------------------------------|----------|-------------|----------|-------------|----------|----------|------------|----------|-------------|----------|
|                                 | t.stat   | p.value     | FDR      | Fold Change | log2(FC) | t.stat   | p.value    | FDR      | Fold Change | log2(FC) |
| L-Asparagine                    | -2.6619  | 0.037431    | 0.26154  | 1.3515      | 0.43453  | -3.4943  | 0.012915   | 0.22285  | 1.462       | 0.54798  |
| L-Histidine                     | -10.14   | 0.000053505 | 0.045827 | 1.5587      | 0.64036  | -7.4977  | 0.00029105 | 0.076702 | 1.6839      | 0.75178  |
| L-Phenylalanine                 | -4.2451  | 0.0054094   | 0.15872  | 1.5203      | 0.60432  | -2.9414  | 0.0259     | 0.2762   | 1.3179      | 0.39822  |
| L-Proline                       | -3.1704  | 0.01931     | 0.21814  | 1.3829      | 0.4677   | -2.6654  | 0.037254   | 0.33151  | 1.5501      | 0.63237  |
| L-Serine                        | -3.5615  | 0.011906    | 0.19588  | 1.2807      | 0.35695  | -4.0359  | 0.0068343  | 0.18298  | 1.4257      | 0.51167  |
| Methionine sulfoxide            | -3.198   | 0.018647    | 0.21676  | 2.2306      | 1.1574   | -6.1731  | 0.00083041 | 0.097188 | 2.1805      | 1.1246   |
| Alpha-Lactose                   | -3.2662  | 0.017115    | 0.214    | 1.7259      | 0.78733  | -        | -          | -        | -           | -        |
| L-Leucine                       | -2.5503  | 0.043476    | 0.24713  | 1.5974      | 0.67568  | -        | -          | -        | -           | -        |
| L-Methionine                    | -3.6806  | 0.010324    | 0.19045  | 1.2126      | 0.27807  | -        | -          | -        | -           | -        |
| L-Norleucine                    | -5.53    | 0.0014731   | 0.13066  | 1.4505      | 0.53653  | -        | -          | -        | -           | -        |
| L-Tryptophan                    | -2.4527  | 0.049609    | 0.29153  | 1.414       | 0.49974  | -        | -          | -        | -           | -        |
| Maltotriose                     | -3.3699  | 0.015045    | 0.2071   | 1.9492      | 0.96287  | -        | -          | -        | -           | -        |
| Ribonolactone                   | -3.7378  | 0.0096479   | 0.15658  | 1.7224      | 0.78444  | -        | -          | -        | -           | -        |
| 1-Methylhistidine               | -        | -           | -        | -           | -        | -2.831   | 0.02992    | 0.29545  | 1.2772      | 0.35302  |
| Creatine                        | -        | -           | -        | -           | -        | -4.4707  | 0.0042343  | 0.16814  | 1.4608      | 0.54676  |
| D-Lactic acid                   | -        | -           | -        | -           | -        | -2.4651  | 0.048783   | 0.36355  | 1.5143      | 0.59866  |
| Glycerophosphocholine           | -        | -           | -        | -           | -        | -2.7987  | 0.031219   | 0.29869  | 1.2919      | 0.36953  |
| L-Arginine                      | -        | -           | -        | -           | -        | -5.0437  | 0.0023482  | 0.14084  | 1.369       | 0.45311  |
| L-Homoserine                    | -        | -           | -        | -           | -        | -2.6041  | 0.040438   | 0.34123  | 1.455       | 0.54106  |
| L-Lysine                        | -        | -           | -        | -           | -        | -3.9778  | 0.0073016  | 0.18412  | 1.5075      | 0.59212  |
| Ornithine                       | -        | -           | -        | -           | -        | -3.9324  | 0.0076918  | 0.18412  | 1.6627      | 0.73356  |
| Pipecolic acid                  | -        | -           | -        | -           | -        | -3.8534  | 0.0084264  | 0.18993  | 1.4876      | 0.57301  |
| PC 34:4                         | 3.055    | 0.022       | 0.436    | 0.462       | -1.114   | 5.864    | 0.001      | 0.046    | 0.295       | -1.762   |
| PS 43:4                         | -        | -           | -        | -           | -        | 9.415    | 0          | 0.094    | 0.299       | -1.742   |
| CAR 16:2_ST 23:1;O4             | 4.172    | 0.006       | 0.259    | 0.348       | -1.523   | 4.357    | 0.005      | 0.17     | 0.342       | -1.549   |
| PE 38:7                         | 3.524    | 0.012       | 0.436    | 0.556       | -0.846   | 3.736    | 0.01       | 0.119    | 0.343       | -1.544   |



|                         |       |       |       |       |        |       |       |       |       |        |
|-------------------------|-------|-------|-------|-------|--------|-------|-------|-------|-------|--------|
| DG 37:5                 | -     | -     | -     | -     | -      | 6.897 | 0     | 0.04  | 0.404 | -1.307 |
| PC 36:6                 | 2.65  | 0.038 | 0.495 | 0.607 | -0.72  | 4.699 | 0.003 | 0.063 | 0.413 | -1.277 |
| CAR 14:1                | 3.393 | 0.015 | 0.307 | 0.616 | -0.698 | 7.328 | 0     | 0.109 | 0.432 | -1.212 |
| CAR 18:1                | 2.911 | 0.027 | 0.335 | 0.624 | -0.681 | 5.29  | 0.002 | 0.135 | 0.432 | -1.211 |
| ST 24:3;O4              | -     | -     | -     | -     | -      | 4.071 | 0.007 | 0.181 | 0.459 | -1.124 |
| PE 40:7                 | 2.703 | 0.035 | 0.495 | 0.622 | -0.685 | 4.906 | 0.003 | 0.062 | 0.472 | -1.083 |
| TG 52:7                 | -     | -     | -     | -     | -      | 3.257 | 0.017 | 0.278 | 0.5   | -0.999 |
| PS 44:5                 | -     | -     | -     | -     | -      | 2.556 | 0.043 | 0.421 | 0.533 | -0.908 |
| PC 32:1                 | 3.306 | 0.016 | 0.307 | 0.719 | -0.475 | 5.601 | 0.001 | 0.131 | 0.539 | -0.892 |
| PE 38:5                 | 3.693 | 0.01  | 0.413 | 0.717 | -0.479 | 3.847 | 0.008 | 0.107 | 0.559 | -0.84  |
| plasmeyl-PE 36:1        | -     | -     | -     | -     | -      | 3.304 | 0.016 | 0.27  | 0.582 | -0.78  |
| PS O-36:3_PG O-36:5     | -     | -     | -     | -     | -      | 3.596 | 0.011 | 0.222 | 0.627 | -0.672 |
| PS 37:5_PG 37:7         | -     | -     | -     | -     | -      | 2.807 | 0.031 | 0.356 | 0.631 | -0.665 |
| FA 16:1                 | -     | -     | -     | -     | -      | 5.133 | 0.002 | 0.057 | 0.634 | -0.658 |
| MADAG 50:8+NH4          | -     | -     | -     | -     | -      | 4.08  | 0.007 | 0.181 | 0.639 | -0.646 |
| PS 34:0                 | -     | -     | -     | -     | -      | 4.23  | 0.006 | 0.082 | 0.656 | -0.607 |
| PE 36:3                 | -     | -     | -     | -     | -      | 2.622 | 0.039 | 0.407 | 0.665 | -0.588 |
| PC O-30:2               | 3.302 | 0.016 | 0.307 | 0.715 | -0.484 | 3.995 | 0.007 | 0.188 | 0.667 | -0.584 |
| LPC 24:0_LPE O-27:1;O   | -     | -     | -     | -     | -      | 2.564 | 0.043 | 0.317 | 0.685 | -0.547 |
| SM 43:1;O2              | -     | -     | -     | -     | -      | 5.565 | 0.001 | 0.131 | 0.686 | -0.543 |
| PE 38:3                 | -     | -     | -     | -     | -      | 2.625 | 0.039 | 0.31  | 0.687 | -0.541 |
| PC 42:9                 | 2.451 | 0.05  | 0.367 | 0.699 | -0.517 | 2.857 | 0.029 | 0.35  | 0.688 | -0.54  |
| PE 38:4                 | 4.003 | 0.007 | 0.341 | 0.782 | -0.354 | 7.076 | 0     | 0.038 | 0.689 | -0.538 |
| PC 41:3                 | 4.159 | 0.006 | 0.259 | 0.652 | -0.616 | 6.103 | 0.001 | 0.113 | 0.692 | -0.531 |
| PC 35:4                 | -     | -     | -     | -     | -      | 5.449 | 0.002 | 0.132 | 0.693 | -0.53  |
| PE O-32:2               | 3.385 | 0.015 | 0.307 | 0.62  | -0.689 | 4.605 | 0.004 | 0.161 | 0.694 | -0.527 |
| PE 40:6                 | -     | -     | -     | -     | -      | 3.585 | 0.012 | 0.137 | 0.695 | -0.526 |
| PA 41:4                 | 2.505 | 0.046 | 0.496 | 0.776 | -0.366 | 4.548 | 0.004 | 0.069 | 0.707 | -0.5   |
| PS 39:5                 | -     | -     | -     | -     | -      | 6.06  | 0.001 | 0.044 | 0.714 | -0.486 |
| PE 36:1_PC 33:1_PA 38:2 | -     | -     | -     | -     | -      | 3.602 | 0.011 | 0.222 | 0.72  | -0.474 |
| CE(18:3)                | 3.106 | 0.021 | 0.328 | 0.667 | -0.584 | 2.761 | 0.033 | 0.358 | 0.731 | -0.451 |

|                                |       |       |       |       |        |        |       |       |       |        |
|--------------------------------|-------|-------|-------|-------|--------|--------|-------|-------|-------|--------|
| CE 20:3                        | 3.073 | 0.022 | 0.328 | 0.693 | -0.53  | 3.734  | 0.01  | 0.203 | 0.742 | -0.431 |
| CAR 16:0                       | 4.713 | 0.003 | 0.216 | 0.598 | -0.741 | 2.945  | 0.026 | 0.333 | 0.749 | -0.416 |
| SM 40:3;3                      | -     | -     | -     | -     | -      | 4.662  | 0.003 | 0.161 | 0.75  | -0.416 |
| PE 37:4                        | 2.451 | 0.05  | 0.367 | 0.876 | -0.191 | 6.16   | 0.001 | 0.113 | 0.76  | -0.396 |
| PE 38:6                        | 2.948 | 0.026 | 0.333 | 0.783 | -0.352 | 2.809  | 0.031 | 0.356 | 0.761 | -0.394 |
| ST 29:2;O7                     | -     | -     | -     | -     | -      | 6.658  | 0.001 | 0.044 | 0.764 | -0.388 |
| PC 36:2                        | 3.588 | 0.012 | 0.284 | 0.753 | -0.409 | 3.154  | 0.02  | 0.285 | 0.767 | -0.383 |
| CAR 20:4_ST 27:3;O4_ST 28:2;O4 | -     | -     | -     | -     | -      | 2.495  | 0.047 | 0.426 | 0.768 | -0.382 |
| PC 38:7                        | -     | -     | -     | -     | -      | 3.397  | 0.015 | 0.256 | 0.777 | -0.365 |
| PC 40:8                        | 4.623 | 0.004 | 0.216 | 0.738 | -0.439 | 4.696  | 0.003 | 0.161 | 0.777 | -0.364 |
| CAR 22:5                       | -     | -     | -     | -     | -      | 3.571  | 0.012 | 0.138 | 0.782 | -0.355 |
| PE 40:4                        | -     | -     | -     | -     | -      | 3.032  | 0.023 | 0.317 | 0.79  | -0.34  |
| PC O-29:1_PE O-32:1            | 3.793 | 0.009 | 0.283 | 0.554 | -0.851 | 4.937  | 0.003 | 0.155 | 0.791 | -0.338 |
| PG O-40:7                      | -     | -     | -     | -     | -      | 2.491  | 0.047 | 0.426 | 0.8   | -0.322 |
| PC 37:7                        | 8.304 | 0     | 0.075 | 0.883 | -0.179 | 2.512  | 0.046 | 0.426 | 0.801 | -0.32  |
| PC 36:4                        | 4.402 | 0.005 | 0.235 | 0.85  | -0.235 | 6.485  | 0.001 | 0.113 | 0.802 | -0.318 |
| PC O-31:0_PE O-34:0            | 2.839 | 0.03  | 0.335 | 0.725 | -0.465 | 2.601  | 0.041 | 0.315 | 0.803 | -0.317 |
| LPC 20:4                       | 4.725 | 0.003 | 0.293 | 0.766 | -0.385 | 4.129  | 0.006 | 0.086 | 0.81  | -0.304 |
| PC 36:3                        | -     | -     | -     | -     | -      | 4.487  | 0.004 | 0.069 | 0.814 | -0.296 |
| PC 38:5                        | -     | -     | -     | -     | -      | 3.457  | 0.014 | 0.246 | 0.818 | -0.29  |
| PC 35:5.1                      | -     | -     | -     | -     | -      | 2.5    | 0.047 | 0.426 | 0.844 | -0.245 |
| CE 18:3                        | -     | -     | -     | -     | -      | 2.755  | 0.033 | 0.358 | 0.85  | -0.234 |
| lysoPE 22:4                    | 3.211 | 0.018 | 0.436 | 0.802 | -0.318 | 2.482  | 0.048 | 0.333 | 0.856 | -0.225 |
| FA 23:4;O2_FA 22:4             | -     | -     | -     | -     | -      | 3.296  | 0.016 | 0.179 | 0.867 | -0.206 |
| PE 40:7                        | 3.282 | 0.017 | 0.307 | 0.912 | -0.133 | 5.29   | 0.002 | 0.135 | 0.872 | -0.198 |
| TG 38:0                        | 3.352 | 0.015 | 0.307 | 0.862 | -0.215 | -2.511 | 0.046 | 0.426 | 1.098 | 0.134  |
| PC O-31:2                      | -     | -     | -     | -     | -      | -2.483 | 0.048 | 0.426 | 1.1   | 0.138  |
| SM 34:1;2                      | -     | -     | -     | -     | -      | -3.183 | 0.019 | 0.284 | 1.12  | 0.164  |
| PC O-38:5                      | -     | -     | -     | -     | -      | -3.902 | 0.008 | 0.198 | 1.155 | 0.208  |
| LPG 21:0                       | 3.042 | 0.023 | 0.328 | 0.859 | -0.219 | -2.85  | 0.029 | 0.35  | 1.175 | 0.233  |

|                                          |        |       |       |       |        |         |       |       |       |       |
|------------------------------------------|--------|-------|-------|-------|--------|---------|-------|-------|-------|-------|
| lysoPC 20:2                              | -      | -     | -     | -     | -      | -2.621  | 0.04  | 0.407 | 1.179 | 0.238 |
| DG 42:11                                 | -2.592 | 0.041 | 0.367 | 1.158 | 0.211  | -5.71   | 0.001 | 0.126 | 1.18  | 0.239 |
| PG 39:0                                  | -      | -     | -     | -     | -      | -4.609  | 0.004 | 0.161 | 1.193 | 0.255 |
| plasmeyl-PE 42:4                         | -3.285 | 0.017 | 0.307 | 1.21  | 0.275  | -3.253  | 0.017 | 0.278 | 1.231 | 0.3   |
| PC O-40:6                                | -2.491 | 0.047 | 0.367 | 1.114 | 0.155  | -3.729  | 0.01  | 0.203 | 1.237 | 0.307 |
| DG 36:1                                  | -      | -     | -     | -     | -      | -2.469  | 0.049 | 0.426 | 1.253 | 0.325 |
| MG O-15:0;O.1                            | -      | -     | -     | -     | -      | -2.553  | 0.043 | 0.421 | 1.256 | 0.329 |
| LPC 15:0_LPE 18:0_LPE O-18:1;O           | -      | -     | -     | -     | -      | -2.686  | 0.036 | 0.303 | 1.288 | 0.365 |
| PC O-38:3                                | -      | -     | -     | -     | -      | -2.77   | 0.032 | 0.358 | 1.334 | 0.415 |
| PS O-42:3_PG O-42:5                      | -      | -     | -     | -     | -      | -5.088  | 0.002 | 0.15  | 1.34  | 0.422 |
| LPS O-20:0;O_LPC 17:0_LPE 20:0_PC O-17:0 | -      | -     | -     | -     | -      | -2.816  | 0.031 | 0.273 | 1.355 | 0.439 |
| DG 38:7                                  | -      | -     | -     | -     | -      | -2.692  | 0.036 | 0.378 | 1.429 | 0.515 |
| LPE 18:0                                 | -      | -     | -     | -     | -      | -2.557  | 0.043 | 0.317 | 1.443 | 0.529 |
| CerP 26:1;O2_LPC O-18:2.1                | -      | -     | -     | -     | -      | -2.608  | 0.04  | 0.41  | 1.479 | 0.564 |
| LPC 20:1_PC O-20:1                       | -      | -     | -     | -     | -      | -2.589  | 0.041 | 0.315 | 1.53  | 0.613 |
| LPE 18:2                                 | -      | -     | -     | -     | -      | -2.653  | 0.038 | 0.303 | 1.538 | 0.621 |
| lysoPC 15:0.1                            | -      | -     | -     | -     | -      | -6.341  | 0.001 | 0.113 | 1.556 | 0.638 |
| FA 21:2;O2                               | -3.461 | 0.013 | 0.436 | 1.676 | 0.745  | -4.366  | 0.005 | 0.077 | 1.638 | 0.712 |
| LPC O-16:0                               | -3.352 | 0.015 | 0.436 | 1.342 | 0.425  | -10.306 | 0     | 0.017 | 1.698 | 0.764 |
| LPC O-20:1                               | -3.103 | 0.021 | 0.328 | 1.569 | 0.65   | -4.169  | 0.006 | 0.181 | 1.728 | 0.789 |
| lysoPE 19:0                              | -5.211 | 0.002 | 0.234 | 1.841 | 0.881  | -6.245  | 0.001 | 0.044 | 1.775 | 0.828 |
| PE O-42:4                                | -5.549 | 0.001 | 0.218 | 1.657 | 0.729  | -5.789  | 0.001 | 0.046 | 1.895 | 0.922 |
| Cer 36:0;O3                              | -      | -     | -     | -     | -      | -2.552  | 0.043 | 0.421 | 2.138 | 1.096 |
| LPC O-18:1                               | -4.145 | 0.006 | 0.259 | 1.457 | 0.543  | -8.013  | 0     | 0.109 | 2.166 | 1.115 |
| LPC O-18:1                               | -9.93  | 0     | 0.036 | 1.491 | 0.576  | -21.362 | 0     | 0.001 | 2.199 | 1.137 |
| LPC O-20:0                               | -3.171 | 0.019 | 0.436 | 1.802 | 0.849  | -7.481  | 0     | 0.038 | 2.472 | 1.306 |
| CerP 26:1;O2_LPC O-18:2                  | -3.264 | 0.017 | 0.307 | 1.693 | 0.76   | -8.045  | 0     | 0.109 | 2.651 | 1.407 |
| PC 30:0                                  | 3.383  | 0.015 | 0.307 | 0.802 | -0.319 | -       | -     | -     | -     | -     |
| CAR 2:0                                  | 2.698  | 0.036 | 0.349 | 0.518 | -0.948 | -       | -     | -     | -     | -     |
| CE 18:2                                  | 4.925  | 0.003 | 0.216 | 0.671 | -0.576 | -       | -     | -     | -     | -     |

|                                          |        |       |       |       |        |   |   |   |   |   |
|------------------------------------------|--------|-------|-------|-------|--------|---|---|---|---|---|
| CE(18:2)                                 | 6.126  | 0.001 | 0.143 | 0.655 | -0.611 | - | - | - | - | - |
| CE(20:2)                                 | 4.586  | 0.004 | 0.216 | 0.728 | -0.457 | - | - | - | - | - |
| DAG 40:4                                 | 3.828  | 0.009 | 0.283 | 0.825 | -0.278 | - | - | - | - | - |
| DG 36:3                                  | -2.865 | 0.029 | 0.335 | 1.487 | 0.573  | - | - | - | - | - |
| DG 38:3                                  | -2.879 | 0.028 | 0.335 | 1.426 | 0.512  | - | - | - | - | - |
| DG 44:6                                  | 2.499  | 0.047 | 0.367 | 0.549 | -0.865 | - | - | - | - | - |
| DG 44:9                                  | 4.338  | 0.005 | 0.323 | 0.754 | -0.406 | - | - | - | - | - |
| LPS O-22:0;O_LPC 19:0_LPE 22:0_PC O-19:0 | -2.529 | 0.045 | 0.495 | 1.561 | 0.642  | - | - | - | - | - |
| lysoPC 18:2                              | 2.484  | 0.048 | 0.367 | 0.828 | -0.272 | - | - | - | - | - |
| lysoPC 20:5                              | 2.481  | 0.048 | 0.367 | 0.839 | -0.254 | - | - | - | - | - |
| lysoPC 22:4                              | 2.466  | 0.049 | 0.367 | 0.707 | -0.5   | - | - | - | - | - |
| lysoPC 22:6                              | 2.782  | 0.032 | 0.343 | 0.759 | -0.398 | - | - | - | - | - |
| lysoPC 24:0                              | 4.896  | 0.003 | 0.216 | 0.809 | -0.306 | - | - | - | - | - |
| MADAG 54:10+NH4                          | -2.903 | 0.027 | 0.335 | 1.564 | 0.645  | - | - | - | - | - |
| MADAG 54:11+NH4                          | -2.699 | 0.036 | 0.349 | 1.492 | 0.578  | - | - | - | - | - |
| MADAG 58:12+NH4                          | -2.511 | 0.046 | 0.367 | 1.38  | 0.464  | - | - | - | - | - |
| PE 36:4                                  | 2.846  | 0.029 | 0.454 | 0.828 | -0.272 | - | - | - | - | - |
| PE 42:0                                  | 2.869  | 0.028 | 0.449 | 0.835 | -0.26  | - | - | - | - | - |
| PG 38:1                                  | 2.486  | 0.047 | 0.367 | 0.768 | -0.38  | - | - | - | - | - |
| PG 40:1                                  | 3.262  | 0.017 | 0.307 | 0.77  | -0.378 | - | - | - | - | - |
| PG O-34:2                                | 4.212  | 0.006 | 0.255 | 0.707 | -0.501 | - | - | - | - | - |
| PS 41:0                                  | -2.885 | 0.028 | 0.335 | 1.696 | 0.762  | - | - | - | - | - |
| PS 42:1                                  | -2.483 | 0.048 | 0.367 | 1.462 | 0.548  | - | - | - | - | - |
| PS 44:6                                  | -2.482 | 0.048 | 0.496 | 1.402 | 0.487  | - | - | - | - | - |
| PS O-30:1                                | 3.41   | 0.014 | 0.307 | 0.789 | -0.342 | - | - | - | - | - |
| PS O-33:1_PG O-33:3                      | 3.151  | 0.02  | 0.328 | 0.655 | -0.61  | - | - | - | - | - |
| SM 33:2;O2                               | 4.584  | 0.004 | 0.216 | 0.653 | -0.615 | - | - | - | - | - |
| SM 34:3;4_SM 36:1;2                      | 3.288  | 0.017 | 0.307 | 0.754 | -0.407 | - | - | - | - | - |
| SM 36:1;O2                               | 2.614  | 0.04  | 0.495 | 0.71  | -0.495 | - | - | - | - | - |
| SM 36:2;2                                | 3.633  | 0.011 | 0.284 | 0.798 | -0.326 | - | - | - | - | - |

|                     |        |       |       |       |        |   |   |   |   |   |
|---------------------|--------|-------|-------|-------|--------|---|---|---|---|---|
| SM 36:2;O2          | 3.241  | 0.018 | 0.436 | 0.669 | -0.58  | - | - | - | - | - |
| SM 36:3;4_SM 38:1;2 | 3.011  | 0.024 | 0.328 | 0.626 | -0.676 | - | - | - | - | - |
| SM 36:4;4_SM 38:2;2 | 2.932  | 0.026 | 0.333 | 0.762 | -0.392 | - | - | - | - | - |
| SM 40:3;4           | 4.644  | 0.004 | 0.216 | 0.665 | -0.589 | - | - | - | - | - |
| SM 42:1;O2          | 3.07   | 0.022 | 0.436 | 0.848 | -0.238 | - | - | - | - | - |
| TG 50:3             | -2.938 | 0.026 | 0.333 | 1.663 | 0.734  | - | - | - | - | - |
| TG 51:2             | -3.12  | 0.021 | 0.328 | 1.965 | 0.975  | - | - | - | - | - |
| TG 51:3             | -3.127 | 0.02  | 0.328 | 1.99  | 0.993  | - | - | - | - | - |
| TG 52:1             | -2.505 | 0.046 | 0.367 | 1.511 | 0.595  | - | - | - | - | - |
| TG 52:3             | -3.632 | 0.011 | 0.284 | 1.543 | 0.626  | - | - | - | - | - |
| TG 52:5             | -2.543 | 0.044 | 0.367 | 1.87  | 0.903  | - | - | - | - | - |
| TG 53:2             | -3.069 | 0.022 | 0.328 | 1.72  | 0.782  | - | - | - | - | - |
| TG 53:4             | -2.824 | 0.03  | 0.336 | 1.776 | 0.829  | - | - | - | - | - |
| TG 53:5             | -3.063 | 0.022 | 0.328 | 1.746 | 0.804  | - | - | - | - | - |
| TG 53:5.1           | -2.643 | 0.038 | 0.36  | 1.792 | 0.841  | - | - | - | - | - |
| TG 53:7             | -2.554 | 0.043 | 0.367 | 1.962 | 0.972  | - | - | - | - | - |
| TG 54:5             | -2.51  | 0.046 | 0.367 | 1.528 | 0.611  | - | - | - | - | - |

**Supplementary Table 7:** Pathway analysis of dysregulated metabolites in LD group (A) and HD group (B) compared to Control group (p values shows pathway enrichment analysis based on Global Test and pathway impact values shows the pathway topology analysis).

| <b>(A) Pathway analysis of C vs LD (p-value&lt;0.05, impact&gt;0.02)</b> |       |          |      |          |         |             |          |         |
|--------------------------------------------------------------------------|-------|----------|------|----------|---------|-------------|----------|---------|
|                                                                          | Total | Expected | Hits | Raw p    | #NAME?  | Holm adjust | FDR      | Impact  |
| Aminoacyl-tRNA biosynthesis                                              | 48    | 0.44622  | 8    | 1.52E-09 | 8.8173  | 1.28E-07    | 1.28E-07 | 0.16667 |
| Cysteine and methionine metabolism                                       | 33    | 0.30677  | 2    | 0.035954 | 1.4443  | 1           | 1        | 0.1263  |
| Phenylalanine, tyrosine and tryptophan biosynthesis                      | 4     | 0.037185 | 1    | 0.036705 | 1.4353  | 1           | 1        | 0.5     |
| Valine, leucine and isoleucine biosynthesis                              | 8     | 0.074369 | 1    | 0.072156 | 1.1417  | 1           | 1        | 0       |
| Phenylalanine metabolism                                                 | 12    | 0.11155  | 1    | 0.10639  | 0.97309 | 1           | 1        | 0.35714 |
| Glycerolipid metabolism                                                  | 16    | 0.14874  | 1    | 0.13945  | 0.85557 | 1           | 1        | 0.01402 |
| Histidine metabolism                                                     | 16    | 0.14874  | 1    | 0.13945  | 0.85557 | 1           | 1        | 0.22131 |
| beta-Alanine metabolism                                                  | 21    | 0.19522  | 1    | 0.17918  | 0.74671 | 1           | 1        | 0       |
| Sphingolipid metabolism                                                  | 21    | 0.19522  | 1    | 0.17918  | 0.74671 | 1           | 1        | 0       |
| Alanine, aspartate and glutamate metabolism                              | 28    | 0.26029  | 1    | 0.23195  | 0.63461 | 1           | 1        | 0       |
| Glyoxylate and dicarboxylate metabolism                                  | 32    | 0.29748  | 1    | 0.26066  | 0.58392 | 1           | 1        | 0.04233 |
| Glycine, serine and threonine metabolism                                 | 34    | 0.31607  | 1    | 0.27465  | 0.56123 | 1           | 1        | 0.20661 |
| Arginine and proline metabolism                                          | 38    | 0.35325  | 1    | 0.30188  | 0.52017 | 1           | 1        | 0.0778  |
| Valine, leucine and isoleucine degradation                               | 40    | 0.37185  | 1    | 0.31513  | 0.5015  | 1           | 1        | 0       |
| Tryptophan metabolism                                                    | 41    | 0.38114  | 1    | 0.32167  | 0.49258 | 1           | 1        | 0.14305 |

| <b>(B) Pathway analysis of C vs HD (p-value&lt;0.05, impact&gt;0.02)</b> |       |          |      |          |        |             |          |         |
|--------------------------------------------------------------------------|-------|----------|------|----------|--------|-------------|----------|---------|
| HD                                                                       | Total | Expected | Hits | Raw p    | #NAME? | Holm adjust | FDR      | Impact  |
| Aminoacyl-tRNA biosynthesis                                              | 48    | 0.47809  | 7    | 1.14E-07 | 6.9449 | 9.54E-06    | 9.54E-06 | 0.16667 |
| Arginine and proline metabolism                                          | 38    | 0.37849  | 4    | 0.000386 | 3.4133 | 0.032048    | 0.016217 | 0.25841 |
| Arginine biosynthesis                                                    | 14    | 0.13944  | 2    | 0.007867 | 2.1042 | 0.64511     | 0.21536  | 0.13705 |
| Histidine metabolism                                                     | 16    | 0.15936  | 2    | 0.010255 | 1.989  | 0.83069     | 0.21536  | 0.22131 |
| Lysine degradation                                                       | 25    | 0.249    | 2    | 0.024345 | 1.6136 | 1           | 0.40899  | 0       |
| Phenylalanine, tyrosine and tryptophan biosynthesis                      | 4     | 0.039841 | 1    | 0.039288 | 1.4057 | 1           | 0.5188   | 0.5     |

|                                             |    |          |   |          |         |   |        |         |
|---------------------------------------------|----|----------|---|----------|---------|---|--------|---------|
| Glycine, serine and threonine metabolism    | 34 | 0.33865  | 2 | 0.043233 | 1.3642  | 1 | 0.5188 | 0.20661 |
| Biotin metabolism                           | 10 | 0.099602 | 1 | 0.095527 | 1.0199  | 1 | 1      | 0       |
| Phenylalanine metabolism                    | 12 | 0.11952  | 1 | 0.11358  | 0.9447  | 1 | 1      | 0.35714 |
| Ether lipid metabolism                      | 20 | 0.1992   | 1 | 0.18248  | 0.73878 | 1 | 1      | 0       |
| beta-Alanine metabolism                     | 21 | 0.20916  | 1 | 0.19073  | 0.71957 | 1 | 1      | 0       |
| Sphingolipid metabolism                     | 21 | 0.20916  | 1 | 0.19073  | 0.71957 | 1 | 1      | 0       |
| Pyruvate metabolism                         | 22 | 0.21912  | 1 | 0.19891  | 0.70135 | 1 | 1      | 0.08398 |
| Alanine, aspartate and glutamate metabolism | 28 | 0.27888  | 1 | 0.24636  | 0.60843 | 1 | 1      | 0       |
| Glutathione metabolism                      | 28 | 0.27888  | 1 | 0.24636  | 0.60843 | 1 | 1      | 0       |
| Glyoxylate and dicarboxylate metabolism     | 32 | 0.31873  | 1 | 0.27652  | 0.55827 | 1 | 1      | 0.04233 |
| Cysteine and methionine metabolism          | 33 | 0.32869  | 1 | 0.28388  | 0.54686 | 1 | 1      | 0.02184 |
| Glycerophospholipid metabolism              | 36 | 0.35857  | 1 | 0.30555  | 0.51491 | 1 | 1      | 0.04814 |

**Supplementary Table 8:** Differentially expressed genes common in both radiation groups.

(Two-tailed p-value calculation using Wald statistics and Log2 fold change by maximum-likelihood estimate).

| Gene name     | Gene description                                                                                      | LD              |                                |               | HD              |                                |               |
|---------------|-------------------------------------------------------------------------------------------------------|-----------------|--------------------------------|---------------|-----------------|--------------------------------|---------------|
|               |                                                                                                       | log2Fold Change | Upregulation or Downregulation | p-value (adj) | log2Fold Change | Upregulation or Downregulation | p-value (adj) |
| 4930486L24Rik | RIKEN cDNA 4930486L24 gene                                                                            | 2.179           | 2.179                          | 0.00273       | 2.804           | 2.804                          | 1.90757E-09   |
| Adgrf5        | adhesion G protein-coupled receptor F5                                                                | 3.842           | 3.842                          | 0.00509       | 2.783           | 2.783                          | 5.04682E-05   |
| Armcx6        | armadillo repeat containing, X-linked 6                                                               | 2.022           | 2.022                          | 0.04792       | 2.681           | 2.681                          | 0.001640411   |
| Bcas3os1      | breast carcinoma amplified sequence 3, opposite strand 1                                              | 2.275           | 2.275                          | 0.03437       | 2.538           | 2.538                          | 0.000230673   |
| Blk           | B lymphoid kinase                                                                                     | -2.307          | -2.307                         | 2.3E-07       | -3.63           | -3.63                          | 9.10614E-19   |
| Blnk          | B cell linker                                                                                         | -2.044          | -2.044                         | 0.00016       | -2.797          | -2.797                         | 3.39806E-11   |
| Ccr6          | chemokine (C-C motif) receptor 6                                                                      | -2.49           | -2.49                          | 0.00081       | -2.536          | -2.536                         | 4.74191E-05   |
| Cd200         | CD200 antigen                                                                                         | -2.153          | -2.153                         | 0.02696       | -2.724          | -2.724                         | 0.000401773   |
| Cd74          | CD74 antigen (invariant polypeptide of major histocompatibility complex, class II antigen-associated) | -2.064          | -2.064                         | 0.00262       | -5.317          | -5.317                         | 7.45352E-24   |
| Cd79a         | CD79A antigen (immunoglobulin-associated alpha)                                                       | -2.016          | -2.016                         | 0.00097       | -6.132          | -6.132                         | 8.511E-20     |
| Cd79b         | CD79B antigen                                                                                         | -2.03           | -2.03                          | 0.0002        | -7.173          | -7.173                         | 1.39832E-41   |
| Cdkn1a        | cyclin-dependent kinase inhibitor 1A (P21)                                                            | 2.206           | 2.206                          | 0.03427       | 2.482           | 2.482                          | 0.000399111   |
| Chst3         | carbohydrate sulfotransferase 3                                                                       | -2.387          | -2.387                         | 3E-06         | -4.038          | -4.038                         | 5.64482E-20   |
| Ciita         | class II transactivator                                                                               | -2.569          | -2.569                         | 2.3E-07       | -4.601          | -4.601                         | 2.72629E-22   |
| Clca3a1       | chloride channel accessory 3A1                                                                        | 2.594           | 2.594                          | 0.01346       | 2.761           | 2.761                          | 0.001449224   |
| Dexi          | dexamethasone-induced transcript                                                                      | -2.047          | -2.047                         | 0.00026       | -3.229          | -3.229                         | 4.83481E-17   |
| F11r          | F11 receptor                                                                                          | 2.015           | 2.015                          | 0.00368       | 2.204           | 2.204                          | 3.11409E-05   |
| Fcgr2a        | Fc receptor, IgE, low affinity II, alpha polypeptide                                                  | -2.327          | -2.327                         | 0.00017       | -5.381          | -5.381                         | 1.48172E-21   |



|                 |                                                                             |        |        |         |        |        |             |
|-----------------|-----------------------------------------------------------------------------|--------|--------|---------|--------|--------|-------------|
| <b>Fcmmr</b>    | <b>Fc fragment of IgM receptor</b>                                          | -2.185 | -2.185 | 7.7E-05 | -5.804 | -5.804 | 2.07289E-25 |
| <b>Fcrla</b>    | <b>Fc receptor-like A</b>                                                   | -2.001 | -2.001 | 1.3E-05 | -4.782 | -4.782 | 3.16726E-24 |
| <b>Fpr2</b>     | <b>formyl peptide receptor 2</b>                                            | 2.114  | 2.114  | 0.00171 | 2.766  | 2.766  | 4.21174E-07 |
| <b>Gm15050</b>  | <b>predicted gene 15050</b>                                                 | 2.284  | 2.284  | 0.02651 | 3.275  | 3.275  | 4.68598E-06 |
| <b>Gp6</b>      | <b>glycoprotein 6 (platelet)</b>                                            | 2.185  | 2.185  | 0.00056 | 2.472  | 2.472  | 4.47584E-09 |
| <b>H2-Ab1</b>   | <b>histocompatibility 2, class II antigen A, beta 1</b>                     | -2.459 | -2.459 | 0.00039 | -5.95  | -5.95  | 5.1713E-26  |
| <b>H2-Eb2</b>   | <b>histocompatibility 2, class II antigen E beta2</b>                       | -2.227 | -2.227 | 0.00304 | -5.934 | -5.934 | 1.71447E-16 |
| <b>H2-Ob</b>    | <b>histocompatibility 2, O region beta locus</b>                            | -2.412 | -2.412 | 3.2E-06 | -5.902 | -5.902 | 1.97027E-24 |
| <b>Hist1h4m</b> | <b>histone cluster 1, H4m</b>                                               | 2.06   | 2.06   | 0.00187 | 2.602  | 2.602  | 1.40385E-06 |
| <b>Hnmt</b>     | <b>histamine N-methyltransferase</b>                                        | 2.358  | 2.358  | 0.02389 | 3.158  | 3.158  | 9.39632E-06 |
| <b>Mest</b>     | <b>mesoderm specific transcript</b>                                         | 2.208  | 2.208  | 0.00249 | 3.061  | 3.061  | 2.5645E-13  |
| <b>Mfap3l</b>   | <b>microfibrillar-associated protein 3-like</b>                             | 2.694  | 2.694  | 2.9E-07 | 3.254  | 3.254  | 1.70134E-15 |
| <b>Mir5107</b>  | <b>microRNA 5107</b>                                                        | -2.317 | -2.317 | 1.3E-05 | -5.484 | -5.484 | 1.31069E-31 |
| <b>Nyap2</b>    | <b>neuronal tyrosine-phosphorylated phosphoinositide 3-kinase adaptor 2</b> | 2.011  | 2.011  | 0.01978 | 2.339  | 2.339  | 8.0219E-05  |
| <b>Pde5a</b>    | <b>phosphodiesterase 5A, cGMP-specific</b>                                  | 2.038  | 2.038  | 0.00109 | 2.663  | 2.663  | 6.43504E-09 |
| <b>Pdgfa</b>    | <b>platelet derived growth factor, alpha</b>                                | 2.211  | 2.211  | 7.9E-05 | 2.263  | 2.263  | 8.50722E-07 |
| <b>Peg10</b>    | <b>paternally expressed 10</b>                                              | 2.015  | 2.015  | 0.01812 | 2.381  | 2.381  | 1.73103E-06 |
| <b>Plp1</b>     | <b>proteolipid protein (myelin) 1</b>                                       | 2.279  | 2.279  | 0.00104 | 2.381  | 2.381  | 2.26711E-07 |
| <b>Popdc2</b>   | <b>popeye domain containing 2</b>                                           | 2.256  | 2.256  | 0.00183 | 2.649  | 2.649  | 1.40256E-08 |
| <b>Ppm1f</b>    | <b>protein phosphatase 1F (PP2C domain containing)</b>                      | -3.647 | -3.647 | 0.00952 | -4.163 | -4.163 | 2.15394E-05 |
| <b>Ptgs1</b>    | <b>prostaglandin-endoperoxide synthase 1</b>                                | 2.329  | 2.329  | 0.00047 | 2.879  | 2.879  | 1.15454E-09 |
| <b>Rgs18</b>    | <b>regulator of G-protein signaling 18</b>                                  | 2.352  | 2.352  | 0.00883 | 2.976  | 2.976  | 5.12078E-09 |
| <b>Satb2</b>    | <b>special AT-rich sequence binding protein 2</b>                           | 2.42   | 2.42   | 0.04601 | 2.167  | 2.167  | 1.12811E-05 |
| <b>Scd1</b>     | <b>stearoyl-Coenzyme A desaturase 1</b>                                     | -2.134 | -2.134 | 1.3E-05 | -4.841 | -4.841 | 1.5353E-17  |
| <b>Scn4a</b>    | <b>sodium channel, voltage-gated, type IV, alpha</b>                        | -2.414 | -2.414 | 0.00031 | -2.786 | -2.786 | 8.91112E-06 |
| <b>Sdc4</b>     | <b>syndecan 4</b>                                                           | -2.261 | -2.261 | 0.00232 | -2.55  | -2.55  | 0.000188854 |
| <b>Sh3bgrl2</b> | <b>SH3 domain binding glutamic acid-rich protein like 2</b>                 | 2.045  | 2.045  | 0.00362 | 2.802  | 2.802  | 1.14879E-09 |

|                  |                                                                  |        |        |         |        |        |             |
|------------------|------------------------------------------------------------------|--------|--------|---------|--------|--------|-------------|
| <b>Slamf1</b>    | <b>signaling lymphocytic activation molecule family member 1</b> | 2.043  | 2.043  | 0.01036 | 2.413  | 2.413  | 2.45212E-07 |
| <b>Slfn4</b>     | <b>schlafen 4</b>                                                | 2.467  | 2.467  | 0.0041  | 2.228  | 2.228  | 0.000741934 |
| <b>Smim3</b>     | <b>small integral membrane protein 3</b>                         | 2.063  | 2.063  | 0.00235 | 2.806  | 2.806  | 2.81577E-08 |
| <b>Srpk3</b>     | <b>serine/arginine-rich protein specific kinase 3</b>            | -2.313 | -2.313 | 0.00253 | -4.013 | -4.013 | 1.48062E-07 |
| <b>Sycp1</b>     | <b>synaptonemal complex protein 1</b>                            | 2.55   | 2.55   | 0.03417 | 2.476  | 2.476  | 0.002065869 |
| <b>Tnfrsf13c</b> | <b>tumor necrosis factor receptor superfamily, member 13c</b>    | -2.551 | -2.551 | 2.3E-07 | -3.923 | -3.923 | 6.24418E-14 |
| <b>Triqk</b>     | <b>triple QxxK/R motif containing</b>                            | 2.705  | 2.705  | 0.00688 | 2.75   | 2.75   | 5.21562E-06 |
| <b>Trove2</b>    | <b>TROVE domain family, member 2</b>                             | 2.208  | 2.208  | 0.00322 | 2.306  | 2.306  | 4.85907E-07 |
| <b>Ttc34</b>     | <b>tetratricopeptide repeat domain 34</b>                        | 4.286  | 4.286  | 0.00693 | 4.818  | 4.818  | 3.06796E-06 |
| <b>Ttc9</b>      | <b>tetratricopeptide repeat domain 9</b>                         | -3.605 | -3.605 | 0.00342 | -2.852 | -2.852 | 0.001376546 |
| <b>Vill</b>      | <b>villin-like</b>                                               | 2.707  | 2.707  | 0.0302  | 3.012  | 3.012  | 0.006042759 |
| <b>Vpreb3</b>    | <b>pre-B lymphocyte gene 3</b>                                   | -2.338 | -2.338 | 0.00114 | -3.512 | -3.512 | 2.01472E-09 |
| <b>Zfp772</b>    | <b>zinc finger protein 772</b>                                   | -4.146 | -4.146 | 0.02329 | -2.933 | -2.933 | 0.01241694  |
